# Supplementary material for: Assessment of pan coefficient models for the estimation of the reference evapotranspiration in a Mediterranean environment in Turkey
Source: PeerJ. 2022 Jun 8;10:e13554. doi: 10.7717/peerj.13554 (PMC9188310; doi:10.7717/peerj.13554)
Supplement: Supplemental Information 2 [file peerj-10-13554-s002.xlsx]

## Sheet: Penman-Monnteith ETo Estimates
FAO-56 PM Daily ETo estimates (mm/day) obtained by IAM-ETo Software (1998-2019)-(April-October)
YEAR	MON	DAY	DOY	FAO-56 PM
1998	4	1	91	2.6
1998	4	2	92	2.1
1998	4	3	93	2.5
1998	4	4	94	3.3
1998	4	5	95	3
1998	4	6	96	2.9
1998	4	7	97	2.8
1998	4	8	98	3
1998	4	9	99	3
1998	4	10	100	2.9
1998	4	11	101	3.7
1998	4	12	102	3.7
1998	4	13	103	3.7
1998	4	14	104	3.1
1998	4	15	105	2
1998	4	16	106	4.1
1998	4	17	107	1.5
1998	4	18	108	3.2
1998	4	19	109	2.9
1998	4	20	110	3
1998	4	21	111	3.3
1998	4	22	112	2.7
1998	4	23	113	3.1
1998	4	24	114	3.2
1998	4	25	115	2.4
1998	4	26	116	1.3
1998	4	27	117	1.6
1998	4	28	118	2.5
1998	4	29	119	2.5
1998	4	30	120	2.9
1998	5	1	121	3.2
1998	5	2	122	3.2
1998	5	3	123	3.4
1998	5	4	124	3.9
1998	5	5	125	4.1
1998	5	6	126	3
1998	5	7	127	2.3
1998	5	8	128	3.6
1998	5	9	129	3.2
1998	5	10	130	2.7
1998	5	11	131	3.1
1998	5	12	132	3.4
1998	5	13	133	2.9
1998	5	14	134	2.6
1998	5	15	135	3.2
1998	5	16	136	3.4
1998	5	17	137	2.4
1998	5	18	138	1.6
1998	5	19	139	3.1
1998	5	20	140	2.4
1998	5	21	141	3.6
1998	5	22	142	2.7
1998	5	23	143	2.7
1998	5	24	144	3.6
1998	5	25	145	3.9
1998	5	26	146	3.5
1998	5	27	147	3.5
1998	5	28	148	4
1998	5	29	149	4.1
1998	5	30	150	3.6
1998	5	31	151	3
1998	6	1	152	3.8
1998	6	2	153	3.6
1998	6	3	154	3.5
1998	6	4	155	4.1
1998	6	5	156	4.5
1998	6	6	157	4.1
1998	6	7	158	3.6
1998	6	8	159	3.9
1998	6	9	160	3.4
1998	6	10	161	3.9
1998	6	11	162	4.2
1998	6	12	163	3.1
1998	6	13	164	4.5
1998	6	14	165	4.5
1998	6	15	166	4.4
1998	6	16	167	4.1
1998	6	17	168	4.2
1998	6	18	169	3.9
1998	6	19	170	4.2
1998	6	20	171	3.2
1998	6	21	172	3.8
1998	6	22	173	4.1
1998	6	23	174	4.4
1998	6	24	175	4.3
1998	6	25	176	4.4
1998	6	26	177	4.4
1998	6	27	178	4.1
1998	6	28	179	4.3
1998	6	29	180	4.4
1998	6	30	181	4.6
1998	7	1	182	4.6
1998	7	2	183	4.5
1998	7	3	184	4.9
1998	7	4	185	4.7
1998	7	5	186	3.9
1998	7	6	187	3
1998	7	7	188	3.8
1998	7	8	189	4
1998	7	9	190	4
1998	7	10	191	4.5
1998	7	11	192	4.6
1998	7	12	193	4.6
1998	7	13	194	4.6
1998	7	14	195	4.6
1998	7	15	196	4.5
1998	7	16	197	4.1
1998	7	17	198	3.9
1998	7	18	199	4.1
1998	7	19	200	4.4
1998	7	20	201	4.3
1998	7	21	202	4.2
1998	7	22	203	4.2
1998	7	23	204	4.3
1998	7	24	205	3.2
1998	7	25	206	2.8
1998	7	26	207	3.6
1998	7	27	208	3.6
1998	7	28	209	4.2
1998	7	29	210	4.2
1998	7	30	211	3.7
1998	7	31	212	3.6
1998	8	1	213	3.8
1998	8	2	214	3.9
1998	8	3	215	4
1998	8	4	216	3.8
1998	8	5	217	3.9
1998	8	6	218	3.7
1998	8	7	219	3.6
1998	8	8	220	3.6
1998	8	9	221	3.7
1998	8	10	222	4
1998	8	11	223	3.8
1998	8	12	224	3.9
1998	8	13	225	3.9
1998	8	14	226	3.7
1998	8	15	227	3.6
1998	8	16	228	3.9
1998	8	17	229	3.3
1998	8	18	230	3.6
1998	8	19	231	3.6
1998	8	20	232	3.7
1998	8	21	233	3.8
1998	8	22	234	3.7
1998	8	23	235	3.7
1998	8	24	236	3.5
1998	8	25	237	3.4
1998	8	26	238	3.1
1998	8	27	239	3.2
1998	8	28	240	3.4
1998	8	29	241	3.2
1998	8	30	242	3.1
1998	8	31	243	3.1
1998	9	1	244	3.2
1998	9	2	245	3.4
1998	9	3	246	3
1998	9	4	247	2.7
1998	9	5	248	2.7
1998	9	6	249	3.1
1998	9	7	250	2.9
1998	9	8	251	2.6
1998	9	9	252	2.8
1998	9	10	253	2.9
1998	9	11	254	2.9
1998	9	12	255	2.7
1998	9	13	256	2.4
1998	9	14	257	2.8
1998	9	15	258	2.5
1998	9	16	259	2.6
1998	9	17	260	2.7
1998	9	18	261	2.7
1998	9	19	262	2.3
1998	9	20	263	2.4
1998	9	21	264	2.2
1998	9	22	265	2.1
1998	9	23	266	1.9
1998	9	24	267	2.2
1998	9	25	268	2.1
1998	9	26	269	2
1998	9	27	270	2.1
1998	9	28	271	2
1998	9	29	272	2
1998	9	30	273	2.5
1998	10	1	274	3.1
1998	10	2	275	2
1998	10	3	276	1.9
1998	10	4	277	2.1
1998	10	5	278	2
1998	10	6	279	2.1
1998	10	7	280	1.9
1998	10	8	281	3.1
1998	10	9	282	5
1998	10	10	283	2.1
1998	10	11	284	1.6
1998	10	12	285	2.1
1998	10	13	286	3.2
1998	10	14	287	2.6
1998	10	15	288	2
1998	10	16	289	1.6
1998	10	17	290	2.4
1998	10	18	291	2
1998	10	19	292	1.3
1998	10	20	293	1.3
1998	10	21	294	1.3
1998	10	22	295	1.1
1998	10	23	296	1.4
1998	10	24	297	1
1998	10	25	298	1.4
1998	10	26	299	1.2
1998	10	27	300	1.2
1998	10	28	301	0.6
1998	10	29	302	1.8
1998	10	30	303	1.1
1998	10	31	304	1.1
1999	4	1	91	3.1
1999	4	2	92	3.1
1999	4	3	93	2
1999	4	4	94	3
1999	4	5	95	2.5
1999	4	6	96	3.1
1999	4	7	97	1.4
1999	4	8	98	3.1
1999	4	9	99	3
1999	4	10	100	2.9
1999	4	11	101	3.1
1999	4	12	102	1.1
1999	4	13	103	3.3
1999	4	14	104	3.1
1999	4	15	105	3.8
1999	4	16	106	4.3
1999	4	17	107	3.6
1999	4	18	108	3.2
1999	4	19	109	3.7
1999	4	20	110	2.9
1999	4	21	111	3
1999	4	22	112	4.3
1999	4	23	113	4
1999	4	24	114	3.6
1999	4	25	115	4.3
1999	4	26	116	4.2
1999	4	27	117	4.5
1999	4	28	118	4.2
1999	4	29	119	3.3
1999	4	30	120	4.3
1999	5	1	121	3.8
1999	5	2	122	4.1
1999	5	3	123	4.5
1999	5	4	124	4.5
1999	5	5	125	4.3
1999	5	6	126	4.5
1999	5	7	127	3.5
1999	5	8	128	4.6
1999	5	9	129	3.9
1999	5	10	130	4.3
1999	5	11	131	4.3
1999	5	12	132	4.3
1999	5	13	133	4.2
1999	5	14	134	3.9
1999	5	15	135	4.1
1999	5	16	136	4.4
1999	5	17	137	4.4
1999	5	18	138	4.3
1999	5	19	139	4.6
1999	5	20	140	6.9
1999	5	21	141	4.3
1999	5	22	142	4.4
1999	5	23	143	4.6
1999	5	24	144	5
1999	5	25	145	5.1
1999	5	26	146	2.4
1999	5	27	147	4.5
1999	5	28	148	4.8
1999	5	29	149	4.4
1999	5	30	150	4.5
1999	5	31	151	4.9
1999	6	1	152	4.6
1999	6	2	153	5
1999	6	3	154	5.1
1999	6	4	155	4.7
1999	6	5	156	4.9
1999	6	6	157	4.7
1999	6	7	158	5.1
1999	6	8	159	4.9
1999	6	9	160	4.8
1999	6	10	161	4.8
1999	6	11	162	3.6
1999	6	12	163	4.7
1999	6	13	164	4.5
1999	6	14	165	3.1
1999	6	15	166	4.5
1999	6	16	167	4.8
1999	6	17	168	5.2
1999	6	18	169	5.5
1999	6	19	170	5.2
1999	6	20	171	5.4
1999	6	21	172	5
1999	6	22	173	4.7
1999	6	23	174	4.9
1999	6	24	175	4.4
1999	6	25	176	4.9
1999	6	26	177	4.2
1999	6	27	178	4.5
1999	6	28	179	4.3
1999	6	29	180	5.5
1999	6	30	181	5.3
1999	7	1	182	5.4
1999	7	2	183	4.6
1999	7	3	184	4.4
1999	7	4	185	5
1999	7	5	186	5.2
1999	7	6	187	5.3
1999	7	7	188	5.4
1999	7	8	189	4.8
1999	7	9	190	5.4
1999	7	10	191	5.6
1999	7	11	192	5.7
1999	7	12	193	5.8
1999	7	13	194	5.6
1999	7	14	195	5.4
1999	7	15	196	4.9
1999	7	16	197	4
1999	7	17	198	4.8
1999	7	18	199	4.8
1999	7	19	200	4.9
1999	7	20	201	5.4
1999	7	21	202	5.7
1999	7	22	203	5.5
1999	7	23	204	4.9
1999	7	24	205	5.3
1999	7	25	206	5.4
1999	7	26	207	4.2
1999	7	27	208	4.4
1999	7	28	209	4.7
1999	7	29	210	4.9
1999	7	30	211	4.1
1999	7	31	212	3.8
1999	8	1	213	4.5
1999	8	2	214	4.4
1999	8	3	215	4.3
1999	8	4	216	4.2
1999	8	5	217	4.5
1999	8	6	218	4.6
1999	8	7	219	5
1999	8	8	220	4.8
1999	8	9	221	4.5
1999	8	10	222	4.2
1999	8	11	223	4.1
1999	8	12	224	4.8
1999	8	13	225	5
1999	8	14	226	4.9
1999	8	15	227	4.3
1999	8	16	228	4.2
1999	8	17	229	4.2
1999	8	18	230	4.2
1999	8	19	231	4.7
1999	8	20	232	4.1
1999	8	21	233	3.8
1999	8	22	234	3.9
1999	8	23	235	3.5
1999	8	24	236	4
1999	8	25	237	4.2
1999	8	26	238	4.3
1999	8	27	239	4.3
1999	8	28	240	5
1999	8	29	241	4.3
1999	8	30	242	4.1
1999	8	31	243	4.8
1999	9	1	244	4.2
1999	9	2	245	4.2
1999	9	3	246	4.7
1999	9	4	247	3.8
1999	9	5	248	4.1
1999	9	6	249	3.6
1999	9	7	250	3.7
1999	9	8	251	4.1
1999	9	9	252	3.4
1999	9	10	253	3.3
1999	9	11	254	3.9
1999	9	12	255	2.2
1999	9	13	256	3.1
1999	9	14	257	3
1999	9	15	258	2.8
1999	9	16	259	3.6
1999	9	17	260	3.6
1999	9	18	261	3.3
1999	9	19	262	3.7
1999	9	20	263	3.1
1999	9	21	264	3.3
1999	9	22	265	3.4
1999	9	23	266	3.2
1999	9	24	267	3
1999	9	25	268	3
1999	9	26	269	3.6
1999	9	27	270	3
1999	9	28	271	2.9
1999	9	29	272	3.1
1999	9	30	273	4
1999	10	1	274	2.9
1999	10	2	275	2.8
1999	10	3	276	2.7
1999	10	4	277	2.9
1999	10	5	278	2.8
1999	10	6	279	2.6
1999	10	7	280	2.3
1999	10	8	281	2.5
1999	10	9	282	1.7
1999	10	10	283	2.5
1999	10	11	284	2
1999	10	12	285	3.6
1999	10	13	286	2.7
1999	10	14	287	2.4
1999	10	15	288	2.2
1999	10	16	289	2.3
1999	10	17	290	2.2
1999	10	18	291	2.3
1999	10	19	292	2.2
1999	10	20	293	2.2
1999	10	21	294	2.1
1999	10	22	295	2.1
1999	10	23	296	1.5
1999	10	24	297	2
1999	10	25	298	1.7
1999	10	26	299	2.1
1999	10	27	300	1.7
1999	10	28	301	1.9
1999	10	29	302	2.2
1999	10	30	303	2
1999	10	31	304	3.9
2000	4	1	91	2.7
2000	4	2	92	4.2
2000	4	3	93	3.2
2000	4	4	94	2.7
2000	4	5	95	2.4
2000	4	6	96	3.2
2000	4	7	97	3.4
2000	4	8	98	3.1
2000	4	9	99	1.6
2000	4	10	100	3.2
2000	4	11	101	2.5
2000	4	12	102	3.3
2000	4	13	103	3.5
2000	4	14	104	3
2000	4	15	105	2.9
2000	4	16	106	3.5
2000	4	17	107	3.9
2000	4	18	108	5
2000	4	19	109	3
2000	4	20	110	1
2000	4	21	111	2.3
2000	4	22	112	1.7
2000	4	23	113	2.5
2000	4	24	114	2.3
2000	4	25	115	3
2000	4	26	116	3.9
2000	4	27	117	4.3
2000	4	28	118	1.4
2000	4	29	119	2.3
2000	4	30	120	3
2000	5	1	121	4.1
2000	5	2	122	3.6
2000	5	3	123	3.7
2000	5	4	124	3.5
2000	5	5	125	1.8
2000	5	6	126	2.1
2000	5	7	127	3.5
2000	5	8	128	4.1
2000	5	9	129	4.4
2000	5	10	130	4.5
2000	5	11	131	4.3
2000	5	12	132	4.3
2000	5	13	133	4.5
2000	5	14	134	4.5
2000	5	15	135	3.7
2000	5	16	136	3.7
2000	5	17	137	2.4
2000	5	18	138	4.4
2000	5	19	139	4
2000	5	20	140	3.4
2000	5	21	141	4
2000	5	22	142	4.4
2000	5	23	143	3.3
2000	5	24	144	3.6
2000	5	25	145	4.1
2000	5	26	146	4
2000	5	27	147	4.7
2000	5	28	148	5
2000	5	29	149	4.9
2000	5	30	150	4.1
2000	5	31	151	4.9
2000	6	1	152	5.4
2000	6	2	153	5.3
2000	6	3	154	4.8
2000	6	4	155	4.4
2000	6	5	156	4.9
2000	6	6	157	5.2
2000	6	7	158	4.3
2000	6	8	159	5
2000	6	9	160	5.6
2000	6	10	161	0.9
2000	6	11	162	5.3
2000	6	12	163	5.2
2000	6	13	164	6.6
2000	6	14	165	8.1
2000	6	15	166	6.5
2000	6	16	167	4.8
2000	6	17	168	4.7
2000	6	18	169	5
2000	6	19	170	5.7
2000	6	20	171	5.9
2000	6	21	172	4.9
2000	6	22	173	5.1
2000	6	23	174	5
2000	6	24	175	4.9
2000	6	25	176	5.4
2000	6	26	177	5.3
2000	6	27	178	5.2
2000	6	28	179	4.5
2000	6	29	180	5.4
2000	6	30	181	5.1
2000	7	1	182	5.2
2000	7	2	183	5
2000	7	3	184	5.6
2000	7	4	185	5.4
2000	7	5	186	5.4
2000	7	6	187	5.1
2000	7	7	188	5.2
2000	7	8	189	5.2
2000	7	9	190	5.3
2000	7	10	191	5.1
2000	7	11	192	5.2
2000	7	12	193	5.4
2000	7	13	194	5.4
2000	7	14	195	4.2
2000	7	15	196	4.8
2000	7	16	197	5
2000	7	17	198	4.4
2000	7	18	199	4.3
2000	7	19	200	4.7
2000	7	20	201	4.8
2000	7	21	202	4.8
2000	7	22	203	4.9
2000	7	23	204	4.5
2000	7	24	205	4.9
2000	7	25	206	5
2000	7	26	207	-999
2000	7	27	208	4.9
2000	7	28	209	5.2
2000	7	29	210	4.6
2000	7	30	211	4.7
2000	7	31	212	5
2000	8	1	213	4.9
2000	8	2	214	5.4
2000	8	3	215	5.4
2000	8	4	216	5.9
2000	8	5	217	4.4
2000	8	6	218	4.5
2000	8	7	219	4.5
2000	8	8	220	4.5
2000	8	9	221	4.5
2000	8	10	222	4
2000	8	11	223	3.9
2000	8	12	224	3.6
2000	8	13	225	3.9
2000	8	14	226	4.2
2000	8	15	227	4.3
2000	8	16	228	4.3
2000	8	17	229	4.5
2000	8	18	230	4.4
2000	8	19	231	4
2000	8	20	232	4.1
2000	8	21	233	4.2
2000	8	22	234	4.2
2000	8	23	235	4.1
2000	8	24	236	3.3
2000	8	25	237	4.2
2000	8	26	238	3.4
2000	8	27	239	3.6
2000	8	28	240	4.7
2000	8	29	241	4.6
2000	8	30	242	4.3
2000	8	31	243	4.1
2000	9	1	244	4.5
2000	9	2	245	4.3
2000	9	3	246	3.7
2000	9	4	247	4.2
2000	9	5	248	4.3
2000	9	6	249	3.6
2000	9	7	250	4.4
2000	9	8	251	4
2000	9	9	252	4
2000	9	10	253	4.2
2000	9	11	254	3.9
2000	9	12	255	4.1
2000	9	13	256	3.6
2000	9	14	257	3.3
2000	9	15	258	3.4
2000	9	16	259	3.4
2000	9	17	260	3.1
2000	9	18	261	3.6
2000	9	19	262	3.8
2000	9	20	263	3.9
2000	9	21	264	3.5
2000	9	22	265	5.1
2000	9	23	266	3.7
2000	9	24	267	3.3
2000	9	25	268	3.2
2000	9	26	269	2.8
2000	9	27	270	3
2000	9	28	271	2.2
2000	9	29	272	2.1
2000	9	30	273	3.1
2000	10	1	274	3.1
2000	10	2	275	3.4
2000	10	3	276	2.9
2000	10	4	277	3.6
2000	10	5	278	3.4
2000	10	6	279	3.1
2000	10	7	280	3
2000	10	8	281	2.6
2000	10	9	282	2.9
2000	10	10	283	1.5
2000	10	11	284	2.5
2000	10	12	285	2.3
2000	10	13	286	3
2000	10	14	287	3.6
2000	10	15	288	3.5
2000	10	16	289	2.7
2000	10	17	290	2.6
2000	10	18	291	2.6
2000	10	19	292	2.2
2000	10	20	293	0.6
2000	10	21	294	2.4
2000	10	22	295	1.8
2000	10	23	296	2
2000	10	24	297	1.3
2000	10	25	298	1.9
2000	10	26	299	1.7
2000	10	27	300	1.9
2000	10	28	301	1.7
2000	10	29	302	1
2000	10	30	303	2
2000	10	31	304	2.1
2001	4	1	91	4.4
2001	4	2	92	1.5
2001	4	3	93	3.4
2001	4	4	94	3.2
2001	4	5	95	2.9
2001	4	6	96	2.8
2001	4	7	97	3.2
2001	4	8	98	4
2001	4	9	99	3.3
2001	4	10	100	2.7
2001	4	11	101	3.3
2001	4	12	102	4.2
2001	4	13	103	3.3
2001	4	14	104	1.8
2001	4	15	105	3.2
2001	4	16	106	3.1
2001	4	17	107	3.5
2001	4	18	108	3.6
2001	4	19	109	3.9
2001	4	20	110	4.1
2001	4	21	111	4
2001	4	22	112	3.6
2001	4	23	113	4.6
2001	4	24	114	4.4
2001	4	25	115	4.5
2001	4	26	116	3.8
2001	4	27	117	4.3
2001	4	28	118	4.9
2001	4	29	119	5.7
2001	4	30	120	5.8
2001	5	1	121	4.5
2001	5	2	122	6.2
2001	5	3	123	3.6
2001	5	4	124	4.5
2001	5	5	125	4.4
2001	5	6	126	2.9
2001	5	7	127	3.7
2001	5	8	128	2.1
2001	5	9	129	2.1
2001	5	10	130	2
2001	5	11	131	2
2001	5	12	132	3.9
2001	5	13	133	4
2001	5	14	134	4.2
2001	5	15	135	3.1
2001	5	16	136	3.6
2001	5	17	137	4.8
2001	5	18	138	5.2
2001	5	19	139	5.3
2001	5	20	140	4.7
2001	5	21	141	5.5
2001	5	22	142	5.1
2001	5	23	143	5
2001	5	24	144	5.9
2001	5	25	145	6.6
2001	5	26	146	5
2001	5	27	147	5.2
2001	5	28	148	5.2
2001	5	29	149	5.7
2001	5	30	150	5.2
2001	5	31	151	5.4
2001	6	1	152	5.5
2001	6	2	153	5.4
2001	6	3	154	5.7
2001	6	4	155	5.3
2001	6	5	156	4.8
2001	6	6	157	5.4
2001	6	7	158	5.5
2001	6	8	159	5.1
2001	6	9	160	5.7
2001	6	10	161	6.2
2001	6	11	162	6.4
2001	6	12	163	6.5
2001	6	13	164	6.3
2001	6	14	165	5.7
2001	6	15	166	5.8
2001	6	16	167	4.3
2001	6	17	168	6.9
2001	6	18	169	5.8
2001	6	19	170	5.9
2001	6	20	171	5.6
2001	6	21	172	5.8
2001	6	22	173	6.2
2001	6	23	174	5.2
2001	6	24	175	5.6
2001	6	25	176	5.5
2001	6	26	177	5.4
2001	6	27	178	4.7
2001	6	28	179	5.4
2001	6	29	180	6
2001	6	30	181	6.2
2001	7	1	182	5.3
2001	7	2	183	5.4
2001	7	3	184	5.1
2001	7	4	185	5
2001	7	5	186	4.9
2001	7	6	187	5.7
2001	7	7	188	5.3
2001	7	8	189	5.9
2001	7	9	190	6.4
2001	7	10	191	5.8
2001	7	11	192	5.7
2001	7	12	193	5.6
2001	7	13	194	4.9
2001	7	14	195	5
2001	7	15	196	4.5
2001	7	16	197	4.5
2001	7	17	198	5.3
2001	7	18	199	5.3
2001	7	19	200	5
2001	7	20	201	5.6
2001	7	21	202	5.8
2001	7	22	203	5.3
2001	7	23	204	5.5
2001	7	24	205	5.4
2001	7	25	206	5.2
2001	7	26	207	4.9
2001	7	27	208	5
2001	7	28	209	4
2001	7	29	210	4.2
2001	7	30	211	4.4
2001	7	31	212	4.1
2001	8	1	213	5.3
2001	8	2	214	4.9
2001	8	3	215	5.2
2001	8	4	216	4.5
2001	8	5	217	5
2001	8	6	218	4.6
2001	8	7	219	5.1
2001	8	8	220	4.8
2001	8	9	221	4.9
2001	8	10	222	5.2
2001	8	11	223	5.2
2001	8	12	224	4.6
2001	8	13	225	4.4
2001	8	14	226	4.9
2001	8	15	227	5
2001	8	16	228	4.7
2001	8	17	229	4.9
2001	8	18	230	4.3
2001	8	19	231	4.1
2001	8	20	232	4.7
2001	8	21	233	4.9
2001	8	22	234	5
2001	8	23	235	4.9
2001	8	24	236	5.1
2001	8	25	237	4.9
2001	8	26	238	4.7
2001	8	27	239	5
2001	8	28	240	4.7
2001	8	29	241	4.9
2001	8	30	242	4.9
2001	8	31	243	5.1
2001	9	1	244	4.7
2001	9	2	245	4.7
2001	9	3	246	4.5
2001	9	4	247	4.3
2001	9	5	248	4.5
2001	9	6	249	4.3
2001	9	7	250	3.4
2001	9	8	251	4.3
2001	9	9	252	3.9
2001	9	10	253	4.4
2001	9	11	254	3.6
2001	9	12	255	3.9
2001	9	13	256	4.2
2001	9	14	257	3.8
2001	9	15	258	4
2001	9	16	259	4
2001	9	17	260	4
2001	9	18	261	4
2001	9	19	262	3.9
2001	9	20	263	4
2001	9	21	264	3.9
2001	9	22	265	3.6
2001	9	23	266	3.6
2001	9	24	267	3.7
2001	9	25	268	3.7
2001	9	26	269	3.4
2001	9	27	270	3.6
2001	9	28	271	3.8
2001	9	29	272	3.8
2001	9	30	273	3.6
2001	10	1	274	3.6
2001	10	2	275	3.4
2001	10	3	276	3.4
2001	10	4	277	3.6
2001	10	5	278	2.9
2001	10	6	279	3.5
2001	10	7	280	3.4
2001	10	8	281	3.3
2001	10	9	282	4.6
2001	10	10	283	3
2001	10	11	284	3
2001	10	12	285	2.9
2001	10	13	286	3
2001	10	14	287	2.8
2001	10	15	288	2.6
2001	10	16	289	2.8
2001	10	17	290	2.6
2001	10	18	291	2.6
2001	10	19	292	3.1
2001	10	20	293	2.4
2001	10	21	294	2.5
2001	10	22	295	2.2
2001	10	23	296	2.5
2001	10	24	297	2.6
2001	10	25	298	3
2001	10	26	299	3.7
2001	10	27	300	2.9
2001	10	28	301	1.4
2001	10	29	302	1.7
2001	10	30	303	1.9
2001	10	31	304	1.7
2002	4	1	91	1.3
2002	4	2	92	1.9
2002	4	3	93	3.3
2002	4	4	94	1.5
2002	4	5	95	3.3
2002	4	6	96	1.8
2002	4	7	97	3.2
2002	4	8	98	2.9
2002	4	9	99	3.5
2002	4	10	100	3.8
2002	4	11	101	4
2002	4	12	102	3.7
2002	4	13	103	1.8
2002	4	14	104	3.5
2002	4	15	105	2.5
2002	4	16	106	1.9
2002	4	17	107	3.4
2002	4	18	108	2.9
2002	4	19	109	1.8
2002	4	20	110	2.7
2002	4	21	111	3.9
2002	4	22	112	1.4
2002	4	23	113	2.8
2002	4	24	114	2.2
2002	4	25	115	3.3
2002	4	26	116	3.3
2002	4	27	117	3.2
2002	4	28	118	4
2002	4	29	119	3.3
2002	4	30	120	4
2002	5	1	121	4
2002	5	2	122	2.1
2002	5	3	123	3.3
2002	5	4	124	3.6
2002	5	5	125	3.3
2002	5	6	126	4.7
2002	5	7	127	3.8
2002	5	8	128	3.9
2002	5	9	129	4.7
2002	5	10	130	4.4
2002	5	11	131	4.1
2002	5	12	132	3.6
2002	5	13	133	3.5
2002	5	14	134	2.4
2002	5	15	135	3
2002	5	16	136	4.2
2002	5	17	137	3.9
2002	5	18	138	2.1
2002	5	19	139	3.7
2002	5	20	140	4.4
2002	5	21	141	3.9
2002	5	22	142	4.3
2002	5	23	143	3.2
2002	5	24	144	4.5
2002	5	25	145	4.9
2002	5	26	146	5.2
2002	5	27	147	4.1
2002	5	28	148	4.2
2002	5	29	149	3.9
2002	5	30	150	4.3
2002	5	31	151	4.3
2002	6	1	152	3
2002	6	2	153	4.4
2002	6	3	154	5.1
2002	6	4	155	4.2
2002	6	5	156	3.5
2002	6	6	157	4.7
2002	6	7	158	5.2
2002	6	8	159	4.8
2002	6	9	160	5.3
2002	6	10	161	5
2002	6	11	162	5.2
2002	6	12	163	4.5
2002	6	13	164	4.7
2002	6	14	165	5.2
2002	6	15	166	5.2
2002	6	16	167	4.4
2002	6	17	168	4.6
2002	6	18	169	5.2
2002	6	19	170	6.9
2002	6	20	171	6.1
2002	6	21	172	7.6
2002	6	22	173	5.2
2002	6	23	174	5.7
2002	6	24	175	5.4
2002	6	25	176	5
2002	6	26	177	4.1
2002	6	27	178	4.9
2002	6	28	179	4.4
2002	6	29	180	5.1
2002	6	30	181	5.6
2002	7	1	182	5
2002	7	2	183	4.6
2002	7	3	184	4.7
2002	7	4	185	5.4
2002	7	5	186	5.6
2002	7	6	187	5.5
2002	7	7	188	5.5
2002	7	8	189	4.8
2002	7	9	190	4.6
2002	7	10	191	4.9
2002	7	11	192	4.4
2002	7	12	193	4.4
2002	7	13	194	4.2
2002	7	14	195	4.2
2002	7	15	196	5.2
2002	7	16	197	5.5
2002	7	17	198	5.7
2002	7	18	199	5.5
2002	7	19	200	5.2
2002	7	20	201	5.3
2002	7	21	202	5
2002	7	22	203	4.7
2002	7	23	204	4.9
2002	7	24	205	6.5
2002	7	25	206	5.7
2002	7	26	207	5
2002	7	27	208	4.7
2002	7	28	209	5.3
2002	7	29	210	5.3
2002	7	30	211	5.3
2002	7	31	212	5.3
2002	8	1	213	5.2
2002	8	2	214	5.5
2002	8	3	215	4.4
2002	8	4	216	4.3
2002	8	5	217	4.7
2002	8	6	218	4.8
2002	8	7	219	5.1
2002	8	8	220	4.7
2002	8	9	221	4.4
2002	8	10	222	4.7
2002	8	11	223	5.2
2002	8	12	224	5.6
2002	8	13	225	5.3
2002	8	14	226	4.7
2002	8	15	227	4.4
2002	8	16	228	3.9
2002	8	17	229	4
2002	8	18	230	3.1
2002	8	19	231	4.2
2002	8	20	232	4.2
2002	8	21	233	4
2002	8	22	234	4.3
2002	8	23	235	4.8
2002	8	24	236	4.8
2002	8	25	237	4.8
2002	8	26	238	4.8
2002	8	27	239	4.8
2002	8	28	240	4.4
2002	8	29	241	4.6
2002	8	30	242	4.2
2002	8	31	243	3.9
2002	9	1	244	4
2002	9	2	245	4.2
2002	9	3	246	4.2
2002	9	4	247	4.1
2002	9	5	248	3.5
2002	9	6	249	3.9
2002	9	7	250	3.4
2002	9	8	251	3.6
2002	9	9	252	4
2002	9	10	253	3.4
2002	9	11	254	3.6
2002	9	12	255	3.3
2002	9	13	256	3.7
2002	9	14	257	3.5
2002	9	15	258	3.6
2002	9	16	259	3.6
2002	9	17	260	3.7
2002	9	18	261	3.7
2002	9	19	262	4.3
2002	9	20	263	3.6
2002	9	21	264	3.8
2002	9	22	265	3.9
2002	9	23	266	3.2
2002	9	24	267	2.9
2002	9	25	268	3.2
2002	9	26	269	3.1
2002	9	27	270	2.9
2002	9	28	271	3.2
2002	9	29	272	3.2
2002	9	30	273	3
2002	10	1	274	3
2002	10	2	275	2.1
2002	10	3	276	3.3
2002	10	4	277	2.9
2002	10	5	278	3
2002	10	6	279	3
2002	10	7	280	2.2
2002	10	8	281	2.4
2002	10	9	282	2.7
2002	10	10	283	2.8
2002	10	11	284	2.7
2002	10	12	285	2.7
2002	10	13	286	2.9
2002	10	14	287	1.8
2002	10	15	288	2.7
2002	10	16	289	2.2
2002	10	17	290	1.8
2002	10	18	291	2.3
2002	10	19	292	2.3
2002	10	20	293	2.3
2002	10	21	294	3.9
2002	10	22	295	2.4
2002	10	23	296	2
2002	10	24	297	1.9
2002	10	25	298	1.9
2002	10	26	299	1.9
2002	10	27	300	2
2002	10	28	301	1.9
2002	10	29	302	1.9
2002	10	30	303	3.5
2002	10	31	304	1.8
2003	4	1	91	2.8
2003	4	2	92	2.3
2003	4	3	93	3
2003	4	4	94	3.5
2003	4	5	95	3.7
2003	4	6	96	3.7
2003	4	7	97	3
2003	4	8	98	3.7
2003	4	9	99	3.4
2003	4	10	100	3.3
2003	4	11	101	4
2003	4	12	102	4
2003	4	13	103	3.9
2003	4	14	104	2.1
2003	4	15	105	1.3
2003	4	16	106	3.2
2003	4	17	107	2
2003	4	18	108	1.3
2003	4	19	109	3.4
2003	4	20	110	2.1
2003	4	21	111	2.6
2003	4	22	112	3.1
2003	4	23	113	1.9
2003	4	24	114	3.7
2003	4	25	115	1
2003	4	26	116	2
2003	4	27	117	4.3
2003	4	28	118	4
2003	4	29	119	2.7
2003	4	30	120	3.7
2003	5	1	121	4.3
2003	5	2	122	5.6
2003	5	3	123	5.2
2003	5	4	124	5.4
2003	5	5	125	5.2
2003	5	6	126	5.3
2003	5	7	127	7
2003	5	8	128	6.7
2003	5	9	129	6.3
2003	5	10	130	5.8
2003	5	11	131	5.6
2003	5	12	132	5.2
2003	5	13	133	5.1
2003	5	14	134	5.4
2003	5	15	135	4.5
2003	5	16	136	4.8
2003	5	17	137	4.6
2003	5	18	138	5.3
2003	5	19	139	5.3
2003	5	20	140	5.3
2003	5	21	141	4.6
2003	5	22	142	4.8
2003	5	23	143	4.9
2003	5	24	144	4.9
2003	5	25	145	5.4
2003	5	26	146	4.7
2003	5	27	147	4.9
2003	5	28	148	4
2003	5	29	149	3.3
2003	5	30	150	3
2003	5	31	151	2.4
2003	6	1	152	4.3
2003	6	2	153	4
2003	6	3	154	4.2
2003	6	4	155	4.6
2003	6	5	156	6.2
2003	6	6	157	6
2003	6	7	158	5.5
2003	6	8	159	2.9
2003	6	9	160	4.2
2003	6	10	161	4.1
2003	6	11	162	4.4
2003	6	12	163	4.2
2003	6	13	164	5.1
2003	6	14	165	5.5
2003	6	15	166	5.6
2003	6	16	167	5.4
2003	6	17	168	4.5
2003	6	18	169	5.3
2003	6	19	170	5.5
2003	6	20	171	5
2003	6	21	172	4.5
2003	6	22	173	4.4
2003	6	23	174	5.2
2003	6	24	175	5.7
2003	6	25	176	6.1
2003	6	26	177	5.4
2003	6	27	178	4.8
2003	6	28	179	4.5
2003	6	29	180	5.2
2003	6	30	181	5.6
2003	7	1	182	5.9
2003	7	2	183	5.4
2003	7	3	184	5.6
2003	7	4	185	5.7
2003	7	5	186	5.7
2003	7	6	187	4
2003	7	7	188	4.7
2003	7	8	189	5.2
2003	7	9	190	4.5
2003	7	10	191	5
2003	7	11	192	5.4
2003	7	12	193	5.4
2003	7	13	194	5
2003	7	14	195	4.7
2003	7	15	196	4.8
2003	7	16	197	5.2
2003	7	17	198	5.1
2003	7	18	199	5.3
2003	7	19	200	5.7
2003	7	20	201	5.3
2003	7	21	202	5.1
2003	7	22	203	5.2
2003	7	23	204	5.4
2003	7	24	205	5
2003	7	25	206	4.8
2003	7	26	207	5
2003	7	27	208	4.8
2003	7	28	209	4.8
2003	7	29	210	4.7
2003	7	30	211	4.9
2003	7	31	212	4.5
2003	8	1	213	4.9
2003	8	2	214	4.8
2003	8	3	215	4.7
2003	8	4	216	4.6
2003	8	5	217	3.9
2003	8	6	218	4.4
2003	8	7	219	4.7
2003	8	8	220	3.8
2003	8	9	221	4.2
2003	8	10	222	4.5
2003	8	11	223	4.7
2003	8	12	224	4.1
2003	8	13	225	4.5
2003	8	14	226	4.5
2003	8	15	227	4.1
2003	8	16	228	4
2003	8	17	229	4.7
2003	8	18	230	4.5
2003	8	19	231	4.1
2003	8	20	232	4.6
2003	8	21	233	4
2003	8	22	234	4.3
2003	8	23	235	4.4
2003	8	24	236	4.2
2003	8	25	237	3.7
2003	8	26	238	4
2003	8	27	239	3.6
2003	8	28	240	4
2003	8	29	241	4.2
2003	8	30	242	4.5
2003	8	31	243	4.8
2003	9	1	244	4.3
2003	9	2	245	3.7
2003	9	3	246	3.7
2003	9	4	247	3.3
2003	9	5	248	3.2
2003	9	6	249	4.3
2003	9	7	250	4.7
2003	9	8	251	3.9
2003	9	9	252	3.5
2003	9	10	253	3.3
2003	9	11	254	3
2003	9	12	255	3.4
2003	9	13	256	3.3
2003	9	14	257	3.2
2003	9	15	258	2.9
2003	9	16	259	3.1
2003	9	17	260	2.6
2003	9	18	261	4.3
2003	9	19	262	3.7
2003	9	20	263	4.1
2003	9	21	264	5.3
2003	9	22	265	4.5
2003	9	23	266	4.2
2003	9	24	267	3.2
2003	9	25	268	2.8
2003	9	26	269	3
2003	9	27	270	2.9
2003	9	28	271	2.5
2003	9	29	272	2.8
2003	9	30	273	3
2003	10	1	274	2.2
2003	10	2	275	2.7
2003	10	3	276	2.7
2003	10	4	277	2.8
2003	10	5	278	2.8
2003	10	6	279	2.7
2003	10	7	280	2.7
2003	10	8	281	2.5
2003	10	9	282	2.2
2003	10	10	283	2.4
2003	10	11	284	2.8
2003	10	12	285	2.3
2003	10	13	286	2.4
2003	10	14	287	2.1
2003	10	15	288	2.4
2003	10	16	289	2.3
2003	10	17	290	2.1
2003	10	18	291	2
2003	10	19	292	1.9
2003	10	20	293	1.8
2003	10	21	294	1.9
2003	10	22	295	1.9
2003	10	23	296	2
2003	10	24	297	1.4
2003	10	25	298	1.9
2003	10	26	299	1.7
2003	10	27	300	2.7
2003	10	28	301	1.8
2003	10	29	302	2.9
2003	10	30	303	1.8
2003	10	31	304	0.9
2004	4	1	91	2.9
2004	4	2	92	3.3
2004	4	3	93	4.4
2004	4	4	94	5
2004	4	5	95	3.6
2004	4	6	96	2.7
2004	4	7	97	3.2
2004	4	8	98	3
2004	4	9	99	3
2004	4	10	100	3.8
2004	4	11	101	3.7
2004	4	12	102	3.9
2004	4	13	103	3.6
2004	4	14	104	3.2
2004	4	15	105	3.5
2004	4	16	106	4.2
2004	4	17	107	3.4
2004	4	18	108	1.4
2004	4	19	109	3.8
2004	4	20	110	2.8
2004	4	21	111	1.3
2004	4	22	112	3
2004	4	23	113	2.6
2004	4	24	114	2.9
2004	4	25	115	3.1
2004	4	26	116	4.1
2004	4	27	117	5.2
2004	4	28	118	3.9
2004	4	29	119	4.4
2004	4	30	120	2.6
2004	5	1	121	3.4
2004	5	2	122	3.7
2004	5	3	123	2.7
2004	5	4	124	3.2
2004	5	5	125	3.5
2004	5	6	126	3.6
2004	5	7	127	4.4
2004	5	8	128	2.9
2004	5	9	129	3.3
2004	5	10	130	5.6
2004	5	11	131	2.9
2004	5	12	132	3.6
2004	5	13	133	3.9
2004	5	14	134	3.8
2004	5	15	135	3
2004	5	16	136	3.7
2004	5	17	137	2.3
2004	5	18	138	3.9
2004	5	19	139	3.5
2004	5	20	140	4.7
2004	5	21	141	4.4
2004	5	22	142	4.2
2004	5	23	143	4.2
2004	5	24	144	4.1
2004	5	25	145	4.3
2004	5	26	146	4.4
2004	5	27	147	4.3
2004	5	28	148	4.4
2004	5	29	149	3.9
2004	5	30	150	4.4
2004	5	31	151	3.4
2004	6	1	152	3.8
2004	6	2	153	3.7
2004	6	3	154	4.1
2004	6	4	155	4.3
2004	6	5	156	4.5
2004	6	6	157	4.6
2004	6	7	158	4.7
2004	6	8	159	4
2004	6	9	160	4.6
2004	6	10	161	5
2004	6	11	162	5
2004	6	12	163	4.9
2004	6	13	164	4.9
2004	6	14	165	4.8
2004	6	15	166	5
2004	6	16	167	4.6
2004	6	17	168	4.6
2004	6	18	169	4.7
2004	6	19	170	4
2004	6	20	171	4.9
2004	6	21	172	4.3
2004	6	22	173	4.1
2004	6	23	174	4.1
2004	6	24	175	4.5
2004	6	25	176	4.4
2004	6	26	177	4.8
2004	6	27	178	5.2
2004	6	28	179	5
2004	6	29	180	5.8
2004	6	30	181	5.1
2004	7	1	182	5
2004	7	2	183	5.4
2004	7	3	184	5.1
2004	7	4	185	5.1
2004	7	5	186	5.4
2004	7	6	187	5.5
2004	7	7	188	5.3
2004	7	8	189	4.9
2004	7	9	190	4.2
2004	7	10	191	5.5
2004	7	11	192	5.5
2004	7	12	193	5
2004	7	13	194	5
2004	7	14	195	4.3
2004	7	15	196	5.5
2004	7	16	197	4.5
2004	7	17	198	5.2
2004	7	18	199	5.1
2004	7	19	200	5.4
2004	7	20	201	5.1
2004	7	21	202	4.7
2004	7	22	203	5
2004	7	23	204	5.1
2004	7	24	205	4.7
2004	7	25	206	4.6
2004	7	26	207	4.2
2004	7	27	208	3.9
2004	7	28	209	3.8
2004	7	29	210	4.4
2004	7	30	211	4.5
2004	7	31	212	4.3
2004	8	1	213	4.2
2004	8	2	214	4.4
2004	8	3	215	4
2004	8	4	216	4.3
2004	8	5	217	4
2004	8	6	218	4
2004	8	7	219	3.9
2004	8	8	220	3.9
2004	8	9	221	4.1
2004	8	10	222	3.7
2004	8	11	223	3.7
2004	8	12	224	4.8
2004	8	13	225	4.8
2004	8	14	226	4.8
2004	8	15	227	4.2
2004	8	16	228	4
2004	8	17	229	4.1
2004	8	18	230	4.3
2004	8	19	231	4.1
2004	8	20	232	4.3
2004	8	21	233	4.1
2004	8	22	234	4.3
2004	8	23	235	4
2004	8	24	236	4.2
2004	8	25	237	4.5
2004	8	26	238	4.5
2004	8	27	239	4.4
2004	8	28	240	4
2004	8	29	241	3.9
2004	8	30	242	4
2004	8	31	243	3.8
2004	9	1	244	3.6
2004	9	2	245	3.7
2004	9	3	246	4
2004	9	4	247	3.9
2004	9	5	248	4
2004	9	6	249	4.5
2004	9	7	250	4
2004	9	8	251	3.8
2004	9	9	252	3.9
2004	9	10	253	3.5
2004	9	11	254	4.4
2004	9	12	255	6
2004	9	13	256	3.6
2004	9	14	257	3.7
2004	9	15	258	3.7
2004	9	16	259	3.6
2004	9	17	260	3.5
2004	9	18	261	3.7
2004	9	19	262	3.3
2004	9	20	263	3.3
2004	9	21	264	3.4
2004	9	22	265	3.1
2004	9	23	266	2.9
2004	9	24	267	3.1
2004	9	25	268	3.1
2004	9	26	269	2.9
2004	9	27	270	2.9
2004	9	28	271	3
2004	9	29	272	3
2004	9	30	273	2.9
2004	10	1	274	2.9
2004	10	2	275	3.4
2004	10	3	276	2.4
2004	10	4	277	2.7
2004	10	5	278	3.8
2004	10	6	279	2.3
2004	10	7	280	1.9
2004	10	8	281	2.7
2004	10	9	282	2.5
2004	10	10	283	2.7
2004	10	11	284	2.6
2004	10	12	285	2.9
2004	10	13	286	2.5
2004	10	14	287	2.5
2004	10	15	288	2.3
2004	10	16	289	2
2004	10	17	290	2.3
2004	10	18	291	2.3
2004	10	19	292	2.2
2004	10	20	293	2.3
2004	10	21	294	2.4
2004	10	22	295	2.1
2004	10	23	296	2.1
2004	10	24	297	2.5
2004	10	25	298	2.8
2004	10	26	299	2.8
2004	10	27	300	3.3
2004	10	28	301	2.5
2004	10	29	302	2.5
2004	10	30	303	1.6
2004	10	31	304	2.1
2005	4	1	91	3.5
2005	4	2	92	2.2
2005	4	3	93	1.6
2005	4	4	94	2.7
2005	4	5	95	3.4
2005	4	6	96	3.7
2005	4	7	97	3.6
2005	4	8	98	4.8
2005	4	9	99	4.3
2005	4	10	100	3.7
2005	4	11	101	4.3
2005	4	12	102	3.9
2005	4	13	103	5
2005	4	14	104	4
2005	4	15	105	3.2
2005	4	16	106	2.6
2005	4	17	107	2.9
2005	4	18	108	1.7
2005	4	19	109	3.1
2005	4	20	110	3.3
2005	4	21	111	3.6
2005	4	22	112	1.6
2005	4	23	113	3.3
2005	4	24	114	4.1
2005	4	25	115	3.7
2005	4	26	116	3.7
2005	4	27	117	3.4
2005	4	28	118	3.6
2005	4	29	119	3.7
2005	4	30	120	2.5
2005	5	1	121	2.8
2005	5	2	122	3.5
2005	5	3	123	3.9
2005	5	4	124	3.9
2005	5	5	125	4.1
2005	5	6	126	1.9
2005	5	7	127	3.6
2005	5	8	128	3.1
2005	5	9	129	3.3
2005	5	10	130	4.2
2005	5	11	131	4.5
2005	5	12	132	4.3
2005	5	13	133	3.2
2005	5	14	134	4.7
2005	5	15	135	4.5
2005	5	16	136	3.6
2005	5	17	137	4.4
2005	5	18	138	4.8
2005	5	19	139	4.7
2005	5	20	140	4.6
2005	5	21	141	4.2
2005	5	22	142	4.7
2005	5	23	143	4
2005	5	24	144	3.8
2005	5	25	145	3.6
2005	5	26	146	3.9
2005	5	27	147	4.9
2005	5	28	148	3.8
2005	5	29	149	3.1
2005	5	30	150	2.7
2005	5	31	151	2.5
2005	6	1	152	2.3
2005	6	2	153	3.8
2005	6	3	154	4.1
2005	6	4	155	4.2
2005	6	5	156	4.6
2005	6	6	157	4.4
2005	6	7	158	4.7
2005	6	8	159	4.9
2005	6	9	160	4.5
2005	6	10	161	2.8
2005	6	11	162	4
2005	6	12	163	3.9
2005	6	13	164	4.3
2005	6	14	165	4.9
2005	6	15	166	3.9
2005	6	16	167	4.7
2005	6	17	168	5
2005	6	18	169	4.8
2005	6	19	170	4.4
2005	6	20	171	4.5
2005	6	21	172	3.8
2005	6	22	173	4.9
2005	6	23	174	5.6
2005	6	24	175	5.1
2005	6	25	176	5
2005	6	26	177	5.2
2005	6	27	178	5.4
2005	6	28	179	5.1
2005	6	29	180	4.6
2005	6	30	181	4.2
2005	7	1	182	4.8
2005	7	2	183	4.2
2005	7	3	184	4.3
2005	7	4	185	4.6
2005	7	5	186	4
2005	7	6	187	4.6
2005	7	7	188	4.5
2005	7	8	189	4.7
2005	7	9	190	4.9
2005	7	10	191	4.8
2005	7	11	192	4.9
2005	7	12	193	5.1
2005	7	13	194	4.8
2005	7	14	195	4.2
2005	7	15	196	4.4
2005	7	16	197	4.6
2005	7	17	198	5
2005	7	18	199	5
2005	7	19	200	5.2
2005	7	20	201	5.2
2005	7	21	202	5.1
2005	7	22	203	4.7
2005	7	23	204	4.4
2005	7	24	205	4.3
2005	7	25	206	4.3
2005	7	26	207	4.4
2005	7	27	208	4.9
2005	7	28	209	4.6
2005	7	29	210	4.5
2005	7	30	211	3.9
2005	7	31	212	3.6
2005	8	1	213	4.1
2005	8	2	214	3.5
2005	8	3	215	4.8
2005	8	4	216	4.8
2005	8	5	217	4.2
2005	8	6	218	4.6
2005	8	7	219	4.8
2005	8	8	220	4.3
2005	8	9	221	4.6
2005	8	10	222	4.1
2005	8	11	223	4.3
2005	8	12	224	4.6
2005	8	13	225	4.8
2005	8	14	226	4.9
2005	8	15	227	4.7
2005	8	16	228	4.4
2005	8	17	229	4.1
2005	8	18	230	4.4
2005	8	19	231	4.3
2005	8	20	232	3.7
2005	8	21	233	3.9
2005	8	22	234	4.4
2005	8	23	235	4.5
2005	8	24	236	4.1
2005	8	25	237	4.1
2005	8	26	238	3.8
2005	8	27	239	4.5
2005	8	28	240	4.1
2005	8	29	241	4.2
2005	8	30	242	4.5
2005	8	31	243	5.2
2005	9	1	244	4.3
2005	9	2	245	3.6
2005	9	3	246	3.3
2005	9	4	247	3.3
2005	9	5	248	4.9
2005	9	6	249	4.4
2005	9	7	250	3.9
2005	9	8	251	3.9
2005	9	9	252	3.9
2005	9	10	253	3.7
2005	9	11	254	3.8
2005	9	12	255	3.8
2005	9	13	256	3.7
2005	9	14	257	3.6
2005	9	15	258	3.4
2005	9	16	259	3.2
2005	9	17	260	3.1
2005	9	18	261	3.2
2005	9	19	262	3.4
2005	9	20	263	3.4
2005	9	21	264	3.1
2005	9	22	265	3.5
2005	9	23	266	3.1
2005	9	24	267	2.9
2005	9	25	268	3.3
2005	9	26	269	3
2005	9	27	270	3.1
2005	9	28	271	2.5
2005	9	29	272	1.8
2005	9	30	273	2.8
2005	10	1	274	2.8
2005	10	2	275	2.5
2005	10	3	276	2.5
2005	10	4	277	2.9
2005	10	5	278	3.6
2005	10	6	279	2.7
2005	10	7	280	2.7
2005	10	8	281	3
2005	10	9	282	2.3
2005	10	10	283	2.7
2005	10	11	284	2
2005	10	12	285	2.2
2005	10	13	286	2.2
2005	10	14	287	2.5
2005	10	15	288	2.2
2005	10	16	289	1.5
2005	10	17	290	2.3
2005	10	18	291	1.4
2005	10	19	292	1.4
2005	10	20	293	2.4
2005	10	21	294	2.2
2005	10	22	295	2.7
2005	10	23	296	2.6
2005	10	24	297	2.3
2005	10	25	298	2.2
2005	10	26	299	2
2005	10	27	300	1.8
2005	10	28	301	1.6
2005	10	29	302	2
2005	10	30	303	3.2
2005	10	31	304	1.7
2006	4	1	91	2.8
2006	4	2	92	1.3
2006	4	3	93	3
2006	4	4	94	2.8
2006	4	5	95	2.2
2006	4	6	96	2.6
2006	4	7	97	1.3
2006	4	8	98	2.4
2006	4	9	99	4.1
2006	4	10	100	3
2006	4	11	101	3.2
2006	4	12	102	1.5
2006	4	13	103	1.7
2006	4	14	104	3.2
2006	4	15	105	3.4
2006	4	16	106	2.8
2006	4	17	107	2
2006	4	18	108	2
2006	4	19	109	3.1
2006	4	20	110	2
2006	4	21	111	2.6
2006	4	22	112	2.4
2006	4	23	113	4.1
2006	4	24	114	1.4
2006	4	25	115	4.6
2006	4	26	116	5.2
2006	4	27	117	3.5
2006	4	28	118	2.8
2006	4	29	119	4.1
2006	4	30	120	3.1
2006	5	1	121	3.4
2006	5	2	122	3.1
2006	5	3	123	3.4
2006	5	4	124	3.7
2006	5	5	125	3.2
2006	5	6	126	3.6
2006	5	7	127	3.9
2006	5	8	128	4
2006	5	9	129	3.5
2006	5	10	130	3.5
2006	5	11	131	3.5
2006	5	12	132	4
2006	5	13	133	3.9
2006	5	14	134	4.3
2006	5	15	135	4.5
2006	5	16	136	3.7
2006	5	17	137	1.7
2006	5	18	138	3.3
2006	5	19	139	4.1
2006	5	20	140	4.2
2006	5	21	141	3.7
2006	5	22	142	4
2006	5	23	143	4
2006	5	24	144	4.8
2006	5	25	145	4.7
2006	5	26	146	4.8
2006	5	27	147	4.5
2006	5	28	148	4.3
2006	5	29	149	4.3
2006	5	30	150	4.4
2006	5	31	151	4.8
2006	6	1	152	3.9
2006	6	2	153	4.3
2006	6	3	154	4.2
2006	6	4	155	4.4
2006	6	5	156	4.4
2006	6	6	157	4.5
2006	6	7	158	4.4
2006	6	8	159	4.3
2006	6	9	160	4.5
2006	6	10	161	4.5
2006	6	11	162	4.3
2006	6	12	163	4.4
2006	6	13	164	3.8
2006	6	14	165	4
2006	6	15	166	4.3
2006	6	16	167	4.2
2006	6	17	168	4.4
2006	6	18	169	4.8
2006	6	19	170	4.7
2006	6	20	171	4.7
2006	6	21	172	4.7
2006	6	22	173	4.2
2006	6	23	174	3.8
2006	6	24	175	4.4
2006	6	25	176	4
2006	6	26	177	4.3
2006	6	27	178	3.9
2006	6	28	179	4.2
2006	6	29	180	3.1
2006	6	30	181	4
2006	7	1	182	4.6
2006	7	2	183	4.6
2006	7	3	184	4.1
2006	7	4	185	3.8
2006	7	5	186	3.8
2006	7	6	187	4.2
2006	7	7	188	4.4
2006	7	8	189	4.7
2006	7	9	190	4.5
2006	7	10	191	4.4
2006	7	11	192	4.2
2006	7	12	193	4.6
2006	7	13	194	3.5
2006	7	14	195	3.7
2006	7	15	196	4.1
2006	7	16	197	4.5
2006	7	17	198	4.5
2006	7	18	199	4.7
2006	7	19	200	4.8
2006	7	20	201	5
2006	7	21	202	4.7
2006	7	22	203	4.6
2006	7	23	204	4.3
2006	7	24	205	4.2
2006	7	25	206	4.4
2006	7	26	207	4.4
2006	7	27	208	4.4
2006	7	28	209	4.4
2006	7	29	210	4.8
2006	7	30	211	4.9
2006	7	31	212	4.4
2006	8	1	213	3.3
2006	8	2	214	4.2
2006	8	3	215	4.4
2006	8	4	216	4.1
2006	8	5	217	3.7
2006	8	6	218	4.5
2006	8	7	219	4
2006	8	8	220	3.8
2006	8	9	221	3.8
2006	8	10	222	4.2
2006	8	11	223	4.1
2006	8	12	224	4.1
2006	8	13	225	3.9
2006	8	14	226	4.1
2006	8	15	227	4.1
2006	8	16	228	4.1
2006	8	17	229	3.8
2006	8	18	230	4.2
2006	8	19	231	4.2
2006	8	20	232	4.4
2006	8	21	233	4.3
2006	8	22	234	4.4
2006	8	23	235	4.3
2006	8	24	236	4.1
2006	8	25	237	3.9
2006	8	26	238	3.8
2006	8	27	239	3.8
2006	8	28	240	3.6
2006	8	29	241	3.6
2006	8	30	242	4
2006	8	31	243	3.7
2006	9	1	244	3.8
2006	9	2	245	3.4
2006	9	3	246	3.7
2006	9	4	247	3.8
2006	9	5	248	4.3
2006	9	6	249	4
2006	9	7	250	4.4
2006	9	8	251	3.9
2006	9	9	252	3.7
2006	9	10	253	3.6
2006	9	11	254	3.6
2006	9	12	255	3.7
2006	9	13	256	4.1
2006	9	14	257	3.5
2006	9	15	258	3.4
2006	9	16	259	3.4
2006	9	17	260	3.5
2006	9	18	261	3.2
2006	9	19	262	3.1
2006	9	20	263	3.3
2006	9	21	264	3
2006	9	22	265	2.3
2006	9	23	266	2.3
2006	9	24	267	3.1
2006	9	25	268	1.6
2006	9	26	269	2.7
2006	9	27	270	3.1
2006	9	28	271	2.6
2006	9	29	272	1.6
2006	9	30	273	3.1
2006	10	1	274	2.1
2006	10	2	275	2.7
2006	10	3	276	2.8
2006	10	4	277	2.7
2006	10	5	278	2.8
2006	10	6	279	2.6
2006	10	7	280	2.5
2006	10	8	281	2.4
2006	10	9	282	2.4
2006	10	10	283	2.2
2006	10	11	284	2.3
2006	10	12	285	2.3
2006	10	13	286	2.2
2006	10	14	287	2.2
2006	10	15	288	2.1
2006	10	16	289	2.1
2006	10	17	290	1.3
2006	10	18	291	2.5
2006	10	19	292	2.6
2006	10	20	293	1.5
2006	10	21	294	1.9
2006	10	22	295	1.8
2006	10	23	296	2.3
2006	10	24	297	2
2006	10	25	298	1.8
2006	10	26	299	1.7
2006	10	27	300	2.5
2006	10	28	301	2.3
2006	10	29	302	1.4
2006	10	30	303	1.2
2006	10	31	304	1.7
2007	4	1	91	2.5
2007	4	2	92	2
2007	4	3	93	2.9
2007	4	4	94	3.1
2007	4	5	95	2.1
2007	4	6	96	2.7
2007	4	7	97	3
2007	4	8	98	3.4
2007	4	9	99	3.4
2007	4	10	100	3
2007	4	11	101	3.7
2007	4	12	102	3
2007	4	13	103	3.8
2007	4	14	104	3.7
2007	4	15	105	1.6
2007	4	16	106	2.7
2007	4	17	107	1.9
2007	4	18	108	3.2
2007	4	19	109	3.6
2007	4	20	110	3.1
2007	4	21	111	3.1
2007	4	22	112	3.6
2007	4	23	113	4.1
2007	4	24	114	4.8
2007	4	25	115	3.4
2007	4	26	116	3.1
2007	4	27	117	4.4
2007	4	28	118	3.4
2007	4	29	119	2.6
2007	4	30	120	3.5
2007	5	1	121	3.1
2007	5	2	122	3.4
2007	5	3	123	4.1
2007	5	4	124	4.5
2007	5	5	125	3.9
2007	5	6	126	4.4
2007	5	7	127	4.9
2007	5	8	128	4
2007	5	9	129	2.6
2007	5	10	130	2.3
2007	5	11	131	1.2
2007	5	12	132	2.1
2007	5	13	133	2.8
2007	5	14	134	3.5
2007	5	15	135	3.9
2007	5	16	136	3.9
2007	5	17	137	2.4
2007	5	18	138	2
2007	5	19	139	4.1
2007	5	20	140	5.1
2007	5	21	141	3.6
2007	5	22	142	4
2007	5	23	143	3.9
2007	5	24	144	4.2
2007	5	25	145	4.4
2007	5	26	146	3.9
2007	5	27	147	4.1
2007	5	28	148	4.1
2007	5	29	149	3.8
2007	5	30	150	4.6
2007	5	31	151	4.2
2007	6	1	152	4
2007	6	2	153	3.7
2007	6	3	154	4.1
2007	6	4	155	3.3
2007	6	5	156	4.2
2007	6	6	157	4.2
2007	6	7	158	5.4
2007	6	8	159	4
2007	6	9	160	2.6
2007	6	10	161	3.4
2007	6	11	162	4
[truncated: 2,710 more rows]

## Sheet: Kpan model ETo Estimates
Daily ETo estimates (mm/day) obtained by Kpan models (1998-2019)-(April-October)
YEAR	MON	DAY	DOY	Snyder	Mod-Snyder	Wahed-Snyder	Cuenca	Allen-Pruitt	Orang	Pereira	Raghuwanshi-Wallender
1998	4	1	91	1.66784	1.54101	1.29448	1.54629	1.62201	0.8634	1.6329	1.54054
1998	4	2	92	2.08608	1.8906	1.59025	1.91038	1.97574	0.936783	1.89659	1.84865
1998	4	3	93	2.21103	1.98608	1.67119	2.01025	2.06525	0.918913	1.92166	2.05868
1998	4	4	94	3.20464	2.99274	2.50667	2.99939	3.15169	1.71502	3.0803	3.08108
1998	4	5	95	2.76329	2.52202	2.12253	2.5396	2.64674	1.3365	2.67118	2.46487
1998	4	6	96	2.07204	1.88986	1.59027	1.90403	1.98238	0.993429	1.98585	1.84865
1998	4	7	97	4.1458	3.78634	3.18706	3.81065	3.97542	2.02265	4.04504	3.6973
1998	4	8	98	3.44512	3.14753	2.64865	3.16848	3.30429	1.67724	3.3414	3.08108
1998	4	9	99	2.71289	2.49402	2.09722	2.50533	2.62305	1.37355	2.67613	2.46487
1998	4	10	100	4.081	3.75034	3.15452	3.76637	3.94484	2.07028	4.04998	3.6973
1998	4	11	101	2.85572	2.66177	2.23371	2.66067	2.80593	1.55726	2.89805	2.69595
1998	4	12	102	3.1348	2.961	2.47866	2.94605	3.12205	1.81268	3.22947	3.08108
1998	4	13	103	7.46045	7.07701	5.92276	7.01966	7.46157	4.43386	7.80749	7.3946
1998	4	14	104	6.53167	6.10057	5.12193	6.08239	6.43558	3.64892	6.756	6.16217
1998	4	15	105	5.07209	4.66466	3.92143	4.68701	4.90538	2.56295	4.99368	4.62163
1998	4	16	106	2.8739	2.67818	2.24916	2.67318	2.82464	1.58529	2.95698	2.69595
1998	4	17	107	2.75232	2.43129	2.04813	2.45926	2.50078	0.983537	2.27173	2.47041
1998	4	18	108	1.75917	1.61752	1.35825	1.62855	1.69895	0.868307	1.67554	1.61757
1998	4	19	109	2.79469	2.52439	2.12322	2.55331	2.63277	1.2146	2.51709	2.63511
1998	4	20	110	2.56224	2.32215	1.94913	2.35159	2.42049	1.10009	2.20976	2.47041
1998	4	21	111	2.01753	1.87123	1.56665	1.8847	1.96613	1.01288	1.84328	1.92568
1998	4	22	112	3.42534	3.1529	2.64718	3.17328	3.3126	1.70205	3.23067	3.15811
1998	4	23	113	3.28096	3.04926	2.55913	3.05357	3.21249	1.75158	3.24187	3.08108
1998	4	24	114	2.88504	2.73732	2.29194	2.71132	2.88651	1.73035	3.00711	2.85
1998	4	25	115	3.30112	3.06753	2.57633	3.06764	3.23345	1.78309	3.34119	3.08108
1998	4	26	116	2.15391	1.90285	1.59887	1.92452	1.94984	0.720158	1.65846	1.97633
1998	4	27	117	0.776648	0.676302	0.571851	0.682019	0.69084	0.25869	0.643078	0.658777
1998	4	28	118	0.369496	0.327926	0.276705	0.331706	0.339383	0.144728	0.324708	0.329388
1998	4	29	119	2.81369	2.55002	2.14784	2.57256	2.66918	1.29946	2.67203	2.46487
1998	4	30	120	2.12064	1.91686	1.61468	1.93539	2.00371	0.957707	1.98762	1.97633
1998	5	1	121	2.65134	2.39815	2.02038	2.42038	2.50817	1.20832	2.50767	2.31081
1998	5	2	122	1.90961	1.79821	1.50728	1.78794	1.89693	1.10355	1.98018	1.84865
1998	5	3	123	3.77688	3.57573	2.99612	3.54194	3.77186	2.25676	3.99319	3.6973
1998	5	4	124	2.30385	2.1945	1.83526	2.17268	2.31272	1.39424	2.41714	2.31081
1998	5	5	125	4.2975	4.08483	3.41441	4.05734	4.30467	2.53995	4.44578	4.31352
1998	5	6	126	4.75915	4.36768	3.67266	4.39187	4.59044	2.37357	4.6681	4.31352
1998	5	7	127	3.36412	3.10253	2.60797	3.1128	3.2656	1.73678	3.35052	3.08108
1998	5	8	128	1.44808	1.35642	1.13737	1.35326	1.43037	0.809048	1.48103	1.38649
1998	5	9	129	4.38973	4.14926	3.47393	4.1242	4.3754	2.55863	4.56256	4.31352
1998	5	10	130	2.53902	2.32162	1.94984	2.34282	2.43305	1.19822	2.39268	2.31081
1998	5	11	131	2.4314	2.17232	1.82991	2.19847	2.25393	0.981302	2.14739	2.22337
1998	5	12	132	2.83043	2.60098	2.18214	2.62307	2.72881	1.36637	2.61665	2.61892
1998	5	13	133	1.35726	1.20956	1.01899	1.22424	1.25285	0.534614	1.17391	1.23521
1998	5	14	134	1.4741	1.3086	1.10393	1.32381	1.35411	0.575593	1.29226	1.31755
1998	5	15	135	2.16751	1.93725	1.63256	1.96003	2.01167	0.886194	1.9258	1.97633
1998	5	16	136	1.79379	1.61097	1.35773	1.62851	1.67848	0.770742	1.64789	1.64694
1998	5	17	137	2.15304	1.93486	1.63095	1.95539	2.01718	0.933892	1.99439	1.97633
1998	5	18	138	2.80851	2.53019	2.12828	2.56043	2.63481	1.19209	2.50955	2.63511
1998	5	19	139	0.451295	0.402561	0.339098	0.407457	0.417189	0.179032	0.394579	0.411735
1998	5	20	140	2.59977	2.30963	1.94248	2.33863	2.38089	0.950669	2.11242	2.38807
1998	5	21	141	4.32171	3.88323	3.26667	3.93108	4.0374	1.7909	3.77749	4.03501
1998	5	22	142	2.78877	2.46037	2.07527	2.488	2.53287	1.01465	2.35977	2.47041
1998	5	23	143	1.57127	1.3972	1.17946	1.4129	1.44899	0.634108	1.42178	1.3999
1998	5	24	144	3.68428	3.34455	2.81715	3.3718	3.50403	1.72814	3.54192	3.23514
1998	5	25	145	3.02235	2.75846	2.32152	2.77768	2.89487	1.4618	2.93242	2.69595
1998	5	26	146	4.01551	3.7164	3.12407	3.72009	3.91612	2.13447	4.07619	3.6973
1998	5	27	147	4.48296	4.21754	3.53725	4.19075	4.45012	2.59819	4.70187	4.31352
1998	5	28	148	4.20307	3.82597	3.21575	3.86374	4.00418	1.93485	3.92157	3.77433
1998	5	29	149	3.59308	3.21324	2.70646	3.25189	3.33568	1.4604	3.19405	3.29388
1998	5	30	150	3.6028	3.221	2.7137	3.2593	3.34423	1.46869	3.21799	3.29388
1998	5	31	151	5.55594	4.9264	4.15736	4.98301	5.09575	2.161	4.91874	4.94083
1998	6	1	152	3.84191	3.42223	2.88642	3.46181	3.5493	1.54743	3.44541	3.45858
1998	6	2	153	5.10994	4.55597	3.84223	4.6086	4.72759	2.0725	4.60073	4.61144
1998	6	3	154	3.6334	3.24977	2.74085	3.28586	3.37998	1.52341	3.3278	3.29388
1998	6	4	155	2.82579	2.54921	2.14638	2.57655	2.66015	1.24115	2.61387	2.63511
1998	6	5	156	2.36177	2.23301	1.87148	2.21326	2.35574	1.40285	2.4939	2.30311
1998	6	6	157	4.45085	4.00877	3.37746	4.05092	4.18253	1.95177	4.13758	4.11735
1998	6	7	158	4.27195	3.84512	3.2391	3.88672	4.00941	1.85581	3.94917	3.95266
1998	6	8	159	4.06813	3.64784	3.07634	3.68682	3.80002	1.7455	3.77479	3.70562
1998	6	9	160	6.49151	5.82259	4.90912	5.8857	6.06463	2.77786	5.99982	5.92899
1998	6	10	161	3.6424	3.25477	2.74537	3.29113	3.38351	1.5168	3.33423	3.29388
1998	6	11	162	5.23896	4.63754	3.91693	4.68943	4.79661	2.04252	4.69915	4.61144
1998	6	12	163	5.50517	4.90879	4.14247	4.96351	5.09858	2.26779	5.0338	4.94083
1998	6	13	164	4.38168	3.91173	3.29986	3.95564	4.06442	1.81222	4.00655	3.95266
1998	6	14	165	6.44032	5.78567	4.87493	5.84962	6.0273	2.7599	5.93719	5.92899
1998	6	15	166	5.46036	4.86976	4.10582	4.92662	5.05244	2.20809	4.91963	4.94083
1998	6	16	167	5.72703	5.15164	4.34196	5.20562	5.37325	2.50096	5.34281	5.27021
1998	6	17	168	7.03567	6.38057	5.37505	6.43415	6.68223	3.27847	6.76057	6.16217
1998	6	18	169	6.47661	5.81855	4.90587	5.87933	6.06693	2.81661	6.04554	5.92899
1998	6	19	170	3.58983	3.23028	2.72368	3.26256	3.37169	1.58631	3.3797	3.29388
1998	6	20	171	5.14975	4.58468	3.86883	4.63665	4.75636	2.08647	4.67657	4.61144
1998	6	21	172	3.58624	3.21651	2.71009	3.25315	3.34717	1.51175	3.2784	3.29388
1998	6	22	173	4.9527	4.44883	3.74347	4.50295	4.62615	2.05837	4.45083	4.61144
1998	6	23	174	6.99392	6.33853	5.33522	6.39978	6.6294	3.18563	6.59688	6.16217
1998	6	24	175	4.1705	3.85597	3.23961	3.86643	4.06007	2.17714	4.17276	3.85135
1998	6	25	176	7.28479	6.50955	5.49073	6.58226	6.76701	3.03359	6.67429	6.58777
1998	6	26	177	6.34183	5.72672	4.82122	5.78728	5.97858	2.8045	5.90355	5.92899
1998	6	27	178	6.18268	5.58121	4.69996	5.6392	5.82748	2.74112	5.7726	5.7643
1998	6	28	179	6.03791	5.57059	4.68131	5.59054	5.86268	3.11127	6.0117	5.54595
1998	6	29	180	6.83623	6.26506	5.27017	6.30043	6.5834	3.39418	6.72068	6.16217
1998	6	30	181	6.97879	6.33955	5.33705	6.3939	6.64011	3.25851	6.68171	6.16217
1998	7	1	182	7.08392	6.38853	5.38042	6.45589	6.66748	3.11947	6.60949	6.58777
1998	7	2	183	5.63985	5.13016	4.31725	5.17396	5.37472	2.6448	5.40141	5.00676
1998	7	3	184	6.61304	6.11751	5.13451	6.14354	6.43669	3.40381	6.55993	6.16217
1998	7	4	185	7.67034	6.94926	5.84684	7.02056	7.26319	3.45313	7.19418	6.77838
1998	7	5	186	5.87393	5.19556	4.37803	5.25628	5.35213	2.14593	5.06348	5.27021
1998	7	6	187	5.99948	5.29923	4.47502	5.35847	5.47016	2.276	5.31021	5.27021
1998	7	7	188	2.74618	2.4217	2.04676	2.44812	2.49962	1.04456	2.44965	2.38807
1998	7	8	189	1.98807	1.78036	1.501	1.80025	1.85233	0.836951	1.82419	1.81164
1998	7	9	190	6.37164	5.7348	4.82771	5.80043	5.97452	2.727	5.82732	5.92899
1998	7	10	191	6.93992	6.30853	5.3081	6.36531	6.60589	3.22532	6.58795	6.16217
1998	7	11	192	4.4162	3.98658	3.35711	4.028	4.16248	1.95794	4.12113	4.11735
1998	7	12	193	5.46438	4.99441	4.19874	5.0339	5.23872	2.6199	5.24398	4.92973
1998	7	13	194	5.25894	4.7614	4.0082	4.80836	4.97785	2.3793	4.95384	4.62163
1998	7	14	195	3.58768	3.22202	2.71553	3.25711	3.35706	1.54157	3.32219	3.29388
1998	7	15	196	5.62393	5.08682	4.28264	5.13794	5.31584	2.52733	5.28497	5.27021
1998	7	16	197	5.43444	4.8589	4.09634	4.9145	5.04959	2.2503	4.95217	4.94083
1998	7	17	198	6.30868	5.65121	4.76324	5.71518	5.87879	2.6485	5.7833	5.7643
1998	7	18	199	5.45117	4.87879	4.11535	4.93187	5.07746	2.30749	5.04353	4.94083
1998	7	19	200	5.60609	5.03019	4.24273	5.08256	5.24322	2.42802	5.24145	5.10552
1998	7	20	201	7.28623	6.51506	5.49617	6.58648	6.77706	3.06342	6.72426	6.58777
1998	7	21	202	6.4779	5.82351	4.91077	5.88257	6.07571	2.84346	6.08716	5.92899
1998	7	22	203	6.37671	5.70549	4.81391	5.76675	5.93868	2.70659	5.91947	5.7643
1998	7	23	204	5.39609	4.84466	4.08415	4.89664	5.04842	2.32481	5.02697	4.94083
1998	7	24	205	7.43023	6.59506	5.56849	6.66924	6.8323	2.95757	6.72798	6.58777
1998	7	25	206	3.72412	3.30253	2.78877	3.33965	3.4195	1.47217	3.36286	3.29388
1998	7	26	207	4.6421	4.11502	3.47351	4.16193	4.25715	1.8112	4.15673	4.11735
1998	7	27	208	4.55389	4.07191	3.43511	4.11655	4.23566	1.91464	4.20481	4.11735
1998	7	28	209	8.01638	7.23439	6.09778	7.30294	7.56097	3.61386	7.60974	7.41124
1998	7	29	210	5.43767	4.87129	4.10857	4.92384	5.0721	2.31741	5.04493	4.94083
1998	7	30	211	7.25023	6.49506	5.47809	6.56512	6.7628	3.08988	6.72368	6.58777
1998	7	31	212	8.23913	7.35814	6.20965	7.43833	7.65139	3.45013	7.60879	7.41124
1998	8	1	213	7.17823	6.45506	5.44193	6.52161	6.73368	3.1428	6.72909	6.58777
1998	8	2	214	3.64383	3.26028	2.7508	3.29528	3.39353	1.54662	3.382	3.29388
1998	8	3	215	7.25167	6.50057	5.48353	6.56902	6.7727	3.1197	6.76579	6.58777
1998	8	4	216	7.12567	6.43057	5.42025	6.4915	6.72086	3.21232	6.76612	6.58777
1998	8	5	217	6.07645	5.54225	4.66668	5.57848	5.81768	2.9507	5.94619	5.3919
1998	8	6	218	6.62167	6.15057	5.16713	6.14902	6.48401	3.58277	6.7688	6.16217
1998	8	7	219	6.40567	6.03057	5.05865	5.98634	6.36389	3.74153	6.76988	6.16217
1998	8	8	220	8.44535	8.39258	6.99674	7.99373	8.65738	6.42091	10.1084	8.26885
1998	8	9	221	10.5536	9.8865	8.29944	9.83672	10.4329	6.01735	11.0427	10.0135
1998	8	10	222	12.1499	11.0592	9.30821	11.1483	11.5922	5.7487	11.7123	10.7838
1998	8	11	223	5.38475	4.84542	4.08552	4.89384	5.05754	2.37947	5.07353	4.94083
1998	8	12	224	6.18645	5.59567	4.71423	5.64756	5.85241	2.81941	5.88771	5.3919
1998	8	13	225	6.1867	5.6035	4.72205	5.65091	5.86678	2.86966	5.94568	5.3919
1998	8	14	226	5.99871	5.49549	4.62407	5.52517	5.77545	2.98442	5.91713	5.3919
1998	8	15	227	6.29544	5.6521	4.76484	5.71275	5.88982	2.71228	5.84846	5.7643
1998	8	16	228	7.73288	7.07689	5.9554	7.11759	7.4351	3.82223	7.61021	6.93244
1998	8	17	229	7.58982	7.002	5.88814	7.01864	7.37346	3.95748	7.64429	6.93244
1998	8	18	230	6.87367	6.29057	5.29369	6.32675	6.60897	3.39754	6.76229	6.16217
1998	8	19	231	9.23919	8.20505	6.92442	8.299	8.49759	3.65548	8.31523	8.23471
1998	8	20	232	9.17349	8.17443	6.89732	8.26687	8.48491	3.74238	8.35932	8.23471
1998	8	21	233	9.10599	8.13693	6.86342	8.22782	8.45877	3.79199	8.35878	8.23471
1998	8	22	234	7.33879	6.53955	5.51785	6.6135	6.78792	2.9939	6.68875	6.58777
1998	8	23	235	5.54675	4.93542	4.16688	4.99022	5.12177	2.2604	5.07231	4.94083
1998	8	24	236	8.29988	7.39189	6.24016	7.47369	7.67492	3.40548	7.60847	7.41124
1998	8	25	237	4.61104	4.1066	3.46675	4.15205	4.26384	1.89193	4.22702	4.11735
1998	8	26	238	2.78013	2.47146	2.08683	2.49897	2.56345	1.12524	2.53637	2.47041
1998	8	27	239	5.87334	5.24045	4.42298	5.29792	5.4466	2.44284	5.41149	5.27021
1998	8	28	240	5.64017	4.98379	4.21027	5.03911	5.14907	2.16857	5.04681	4.94083
1998	8	29	241	3.70683	3.29528	2.78244	3.33195	3.41793	1.50032	3.38218	3.29388
1998	8	30	242	5.20116	4.61654	3.89794	4.66847	4.78261	2.0703	4.7082	4.61144
1998	8	31	243	7.46623	6.61506	5.58657	6.68927	6.84567	2.93111	6.72499	6.58777
1998	9	1	244	3.58083	3.22528	2.71916	3.25699	3.36797	1.59293	3.38133	3.29388
1998	9	2	245	5.77254	5.18445	4.37236	5.23776	5.40652	2.51693	5.40954	5.27021
1998	9	3	246	4.08229	3.81285	3.2012	3.8015	4.02224	2.28057	4.22502	3.85135
1998	9	4	247	4.49375	4.35042	3.63804	4.23593	4.56555	3.03437	5.06938	4.13443
1998	9	5	248	6.92767	6.32057	5.32081	6.36314	6.63395	3.35785	6.75949	6.16217
1998	9	6	249	6.94279	6.31955	5.31897	6.37047	6.62414	3.28497	6.68572	6.16217
1998	9	7	250	5.43788	4.878	4.11527	4.92812	5.08521	2.36048	5.09604	4.94083
1998	9	8	251	4.68476	4.3358	3.64475	4.3401	4.56881	2.49022	4.75646	4.31352
1998	9	9	252	6.89051	6.304	5.30623	6.33894	6.6238	3.41192	6.795	6.16217
1998	9	10	253	4.29532	3.93375	3.31074	3.95416	4.13459	2.14072	4.24692	3.85135
1998	9	11	254	4.86177	4.40039	3.70777	4.43939	4.60477	2.23575	4.64922	4.23649
1998	9	12	255	6.25071	5.63549	4.75063	5.68993	5.88737	2.7992	5.91616	5.7643
1998	9	13	256	5.42309	4.85966	4.09771	4.91281	5.05926	2.30496	5.00282	4.94083
1998	9	14	257	8.72221	7.8168	6.59528	7.89807	8.14503	3.7609	8.15372	7.90532
1998	9	15	258	5.46488	4.893	4.12883	4.94442	5.09605	2.34064	5.096	4.94083
1998	9	16	259	4.54354	4.0691	3.43285	4.11239	4.23744	1.94155	4.22468	4.11735
1998	9	17	260	4.49764	4.04066	3.40686	4.08287	4.21315	1.95598	4.19956	4.11735
1998	9	18	261	4.83677	4.4174	3.71824	4.44576	4.63798	2.35976	4.73075	4.31352
1998	9	19	262	4.93503	4.43785	3.74133	4.48361	4.62941	2.16067	4.61625	4.52909
1998	9	20	263	4.30639	3.93441	3.31081	3.96059	4.13036	2.09655	4.1941	3.85135
1998	9	21	264	4.1134	3.76834	3.17079	3.78869	3.96031	2.04646	4.0538	3.6973
1998	9	22	265	3.51712	3.18753	2.68481	3.2157	3.33648	1.62432	3.35348	3.08108
1998	9	23	266	4.66639	4.13441	3.49161	4.18079	4.27854	1.83195	4.18849	4.11735
1998	9	24	267	5.36958	4.9329	4.15018	4.9529	5.18928	2.72856	5.3499	4.85271
1998	9	25	268	4.42766	4.15598	3.48651	4.13489	4.38494	2.53361	4.61269	4.23649
1998	9	26	269	5.69845	5.33225	4.47684	5.30866	5.62661	3.22854	5.94457	5.3919
1998	9	27	270	5.7457	5.3585	4.50057	5.34421	5.65274	3.19381	5.94487	5.3919
1998	9	28	271	3.90229	3.71285	3.1108	3.6613	3.91502	2.41288	4.22343	3.85135
1998	9	29	272	5.00675	4.63542	3.89568	4.64114	4.88403	2.65731	5.06824	4.62163
1998	9	30	273	6.77648	6.21302	5.22131	6.25637	6.52341	3.31457	6.53808	6.16217
1998	10	1	274	3.554	3.48403	2.90054	3.39362	3.64108	2.43725	3.91296	3.44535
1998	10	2	275	3.97925	3.74972	3.14356	3.72464	3.95604	2.31771	4.16239	3.85135
1998	10	3	276	4.89102	4.50592	3.7881	4.52273	4.74156	2.50874	4.86178	4.46757
1998	10	4	277	5.11259	4.68716	3.94177	4.71479	4.92472	2.53319	4.99564	4.62163
1998	10	5	278	3.4714	3.15977	2.65949	3.18524	3.31207	1.64248	3.33361	3.08108
1998	10	6	279	3.55312	3.20753	2.70289	3.23852	3.35187	1.59786	3.35503	3.29388
1998	10	7	280	4.22764	3.89066	3.27126	3.90676	4.09305	2.15444	4.19525	3.85135
1998	10	8	281	3.69936	3.56184	2.97059	3.51728	3.74625	2.31112	3.88669	3.85135
1998	10	9	282	5.76073	6.15481	5.05964	5.58334	5.64795	5.44015	7.36437	6.89071
1998	10	10	283	8.30387	8.29279	6.90448	7.88602	8.52503	6.38593	9.86803	8.26885
1998	10	11	284	4.56017	4.38379	3.66787	4.29483	4.61218	2.96239	5.03126	4.62163
1998	10	12	285	4.28586	4.21726	3.51596	4.06906	4.39128	3.07137	4.91069	4.13443
1998	10	13	286	2.77048	2.74447	2.28155	2.65317	2.85115	1.98781	3.1253	2.75628
1998	10	14	287	4.88904	4.53823	3.80475	4.55753	4.77541	2.53537	4.82406	4.62163
1998	10	15	288	5.91367	5.42764	4.56073	5.46371	5.70059	2.91182	5.72913	5.3919
1998	10	16	289	4.2785	3.90125	3.27912	3.93706	4.08661	2.00125	4.01252	3.85135
1998	10	17	290	4.19469	4.05802	3.38521	3.9852	4.26271	2.71728	4.47013	4.39054
1998	10	18	291	4.58178	4.37813	3.66104	4.32294	4.61224	2.8307	4.84618	4.62163
1998	10	19	292	2.54334	2.33815	1.96614	2.34874	2.45911	1.2877	2.51005	2.31081
1998	10	20	293	2.52309	2.3269	1.95597	2.3346	2.4492	1.30258	2.51177	2.31081
1998	10	21	294	3.2824	3.05477	2.56457	3.05421	3.22014	1.7814	3.32645	3.08108
1998	10	22	295	2.44884	2.28565	1.91868	2.28083	2.41062	1.35716	2.51364	2.31081
1998	10	23	296	2.4213	2.26858	1.90309	2.26055	2.39301	1.36582	2.49514	2.31081
1998	10	24	297	4.08229	3.81285	3.2012	3.8015	4.02224	2.28057	4.2185	3.85135
1998	10	25	298	3.08283	2.78382	2.34365	2.81326	2.90625	1.3633	2.84347	2.88215
1998	10	26	299	3.5344	3.19477	2.69113	3.22565	3.33951	1.59618	3.32215	3.29388
1998	10	27	300	3.16347	2.8348	2.39033	2.86581	2.95124	1.34456	2.90848	2.88215
1998	10	28	301	1.19013	1.03126	0.873242	1.03882	1.05088	0.388069	1.00382	0.988165
1998	10	29	302	1.50442	1.40943	1.1795	1.41202	1.48434	0.813037	1.45558	1.46351
1998	10	30	303	5.27567	4.78129	4.02721	4.82355	5.00472	2.43648	5.01147	4.62163
1998	10	31	304	1.78484	1.60601	1.35324	1.62311	1.67486	0.777402	1.64419	1.64694
1999	4	1	91	5.27487	4.7643	4.01025	4.81529	4.97336	2.32856	4.77067	4.94083
1999	4	2	92	5.46764	4.90958	4.12947	4.97102	5.10125	2.24333	4.6429	5.10552
1999	4	3	93	2.17659	1.93664	1.63146	1.96021	2.00349	0.842465	1.83159	1.97633
1999	4	4	94	2.8263	2.49358	2.10649	2.5211	2.57298	1.06814	2.47325	2.47041
1999	4	5	95	3.72132	3.36265	2.83328	3.39451	3.51547	1.6847	3.50074	3.45858
1999	4	6	96	3.01054	2.75307	2.30886	2.78343	2.88076	1.38115	2.6506	2.77298
1999	4	7	97	2.83602	2.48662	2.099	2.51154	2.54925	0.979923	2.31755	2.47041
1999	4	8	98	2.37879	2.12031	1.7886	2.14455	2.20051	0.967624	2.12419	2.14102
1999	4	9	99	4.35749	3.88981	3.27923	3.93514	4.0378	1.77441	3.8654	3.95266
1999	4	10	100	2.75205	2.45233	2.0692	2.48006	2.54547	1.12271	2.48077	2.47041
1999	4	11	101	2.74584	2.45065	2.06784	2.47784	2.54668	1.13886	2.50318	2.47041
1999	4	12	102	2.93997	2.5532	2.16004	2.57289	2.60363	0.961425	2.43061	2.47041
1999	4	13	103	2.42581	2.1708	1.8287	2.19654	2.25499	0.995833	2.12616	2.22337
1999	4	14	104	2.13835	1.91399	1.61085	1.93779	1.98601	0.861302	1.83054	1.97633
1999	4	15	105	2.54782	2.30297	1.9386	2.32696	2.4053	1.13439	2.33945	2.38807
1999	4	16	106	3.22636	2.92694	2.46336	2.95462	3.0625	1.47947	3.0172	2.85
1999	4	17	107	3.40286	3.09321	2.60446	3.11829	3.24152	1.60306	3.25867	3.00406
1999	4	18	108	3.64572	3.32065	2.79532	3.34576	3.48242	1.74027	3.51169	3.23514
1999	4	19	109	3.61324	3.23151	2.72365	3.26893	3.35784	1.4919	3.23354	3.29388
1999	4	20	110	4.09203	3.63993	3.06714	3.68385	3.76616	1.58896	3.51561	3.70562
1999	4	21	111	3.38196	3.04405	2.56429	3.07699	3.17411	1.46918	3.09921	3.12919
1999	4	22	112	2.45802	2.27662	1.90916	2.28822	2.39451	1.25776	2.34442	2.31081
1999	4	23	113	5.05752	4.65303	3.91057	4.67653	4.89255	2.55051	4.92627	4.62163
1999	4	24	114	4.75947	4.42942	3.71862	4.4286	4.6692	2.58303	4.80933	4.46757
1999	4	25	115	1.93247	1.84016	1.54013	1.81856	1.93973	1.18156	2.05138	1.92568
1999	4	26	116	3.99995	3.75533	3.14806	3.74215	3.96062	2.26389	4.10806	3.85135
1999	4	27	117	5.34612	4.88327	4.10178	4.92912	5.11582	2.50585	4.97303	4.85271
1999	4	28	118	5.12178	4.67813	3.93224	4.71754	4.90461	2.43379	4.82615	4.62163
1999	4	29	119	4.4378	3.99564	3.36502	4.03955	4.16577	1.92276	4.05323	4.11735
1999	4	30	120	6.18112	5.64167	4.74475	5.68658	5.91633	2.95042	5.88956	5.54595
1999	5	1	121	4.52844	4.17794	3.51098	4.1929	4.39701	2.33345	4.48849	4.15946
1999	5	2	122	3.71295	3.44787	2.89531	3.45073	3.6333	1.98919	3.74437	3.46622
1999	5	3	123	7.30128	6.6171	5.56588	6.68632	6.91508	3.27874	6.74032	6.47028
1999	5	4	124	3.39796	3.11426	2.61789	3.13522	3.27026	1.66558	3.28498	3.08108
1999	5	5	125	3.67164	3.42227	2.87191	3.42086	3.60763	2.00219	3.72212	3.46622
1999	5	6	126	6.47192	6.04853	5.07306	6.04131	6.377	3.56931	6.57705	6.16217
1999	5	7	127	7.17753	6.39343	5.38031	6.47396	6.60984	2.74184	6.10453	6.58777
1999	5	8	128	3.64734	3.39553	2.84645	3.40432	3.57555	1.93319	3.57246	3.46622
1999	5	9	129	4.32336	3.8652	3.25644	3.91116	4.01308	1.76243	3.83496	3.95266
1999	5	10	130	6.97304	6.31751	5.31531	6.38233	6.6029	3.13921	6.44623	6.16217
1999	5	11	131	5.05644	4.6489	3.9065	4.67532	4.88621	2.52814	4.91104	4.62163
1999	5	12	132	4.93709	4.58966	3.85363	4.59117	4.83734	2.66218	4.98967	4.62163
1999	5	13	133	5.27731	4.74334	3.98914	4.80254	4.93092	2.1805	4.64869	4.94083
1999	5	14	134	7.74852	6.88604	5.80308	6.96878	7.12099	2.98731	6.73598	6.9995
1999	5	15	135	5.28594	4.7764	4.02176	4.82524	4.98931	2.35945	4.92523	4.94083
1999	5	16	136	5.38152	4.83303	4.07329	4.88566	5.03558	2.31236	4.95792	4.94083
1999	5	17	137	5.43228	4.85063	4.08818	4.90779	5.03441	2.20556	4.85424	4.94083
1999	5	18	138	5.24544	4.7539	4.00142	4.79984	4.97205	2.38922	4.93797	4.62163
1999	5	19	139	4.8216	4.45369	3.73957	4.47327	4.6855	2.4702	4.73835	4.46757
1999	5	20	140	6.42828	6.61935	5.45704	6.27843	6.66635	5.17587	7.36064	5.1737
1999	5	21	141	7.15635	6.9807	5.82691	6.77864	7.30422	4.93965	8.04663	6.7529
1999	5	22	142	4.64009	4.42466	3.70447	4.36273	4.66358	2.88048	5.00097	4.62163
1999	5	23	143	5.43871	5.10257	4.27675	5.08932	5.38052	3.05354	5.57596	5.23784
1999	5	24	144	7.6203	6.97725	5.86174	7.0337	7.31915	3.66178	7.27941	6.93244
1999	5	25	145	6.8629	6.19038	5.19402	6.27557	6.43046	2.7878	5.93825	6.58777
1999	5	26	146	6.64762	5.81479	4.90872	5.86917	5.94918	2.23724	5.46701	5.7643
1999	5	27	147	0.647335	0.605404	0.50785	0.604155	0.638425	0.359913	0.659731	0.616217
1999	5	28	148	7.73349	7.37443	6.17412	7.27122	7.77263	4.8008	8.33465	7.70271
1999	5	29	149	10.4574	9.468	7.96482	9.56869	9.89019	4.66407	9.64011	9.88165
1999	5	30	150	8.13327	7.29612	6.13748	7.38767	7.57715	3.313	7.16063	7.57593
1999	5	31	151	7.11704	6.39751	5.38763	6.47029	6.66278	3.03336	6.48567	6.58777
1999	6	1	152	10.7587	9.64953	8.13028	9.75946	10.0415	4.53525	9.79689	9.88165
1999	6	2	153	7.82442	7.09595	5.96956	7.16741	7.41958	3.54649	7.30276	6.93244
1999	6	3	154	5.18496	4.6991	3.94984	4.75187	4.90659	2.2947	4.74605	4.94083
1999	6	4	155	8.56205	7.68901	6.47601	7.77718	8.00404	3.62416	7.77521	7.90532
1999	6	5	156	7.87708	7.09871	5.96949	7.18478	7.39115	3.33407	7.10043	7.41124
1999	6	6	157	11.6775	10.443	8.796	10.5686	10.841	4.74628	10.436	10.7051
1999	6	7	158	10.4895	9.34017	7.87467	9.45037	9.67896	4.17027	9.36197	9.46992
1999	6	8	159	8.24504	7.3853	6.22071	7.47257	7.67555	3.40842	7.43488	7.57593
1999	6	9	160	12.7043	11.326	9.5454	11.461	11.7412	5.07097	11.3203	11.5286
1999	6	10	161	9.75574	8.72507	7.35387	8.82612	9.06616	4.02814	8.83415	8.89349
1999	6	11	162	9.18897	8.22057	6.92686	8.31692	8.54067	3.78319	8.28288	8.3994
1999	6	12	163	7.9038	7.13475	6.00412	7.21387	7.44316	3.4534	7.25714	7.41124
1999	6	13	164	9.2059	8.32095	6.9948	8.41937	8.6757	3.97938	8.33571	8.72879
1999	6	14	165	10.2292	8.82904	7.47197	8.87382	8.95337	3.12189	8.34587	8.48175
1999	6	15	166	4.5071	4.04002	3.40571	4.08482	4.20536	1.91043	4.13862	4.11735
1999	6	16	167	5.28702	4.78053	4.02583	4.82765	4.99643	2.38182	4.97221	4.94083
1999	6	17	168	6.19732	5.65067	4.75289	5.69722	5.92366	2.93851	5.94194	5.54595
1999	6	18	169	8.692	7.8775	6.62605	7.95991	8.23224	3.90326	8.1154	7.70271
1999	6	19	170	9.33922	8.3895	7.06413	8.48703	8.73195	3.94214	8.51133	8.64645
1999	6	20	171	8.692	7.8775	6.62605	7.95991	8.23224	3.90326	8.08748	7.70271
1999	6	21	172	8.67427	7.81245	6.5777	7.89966	8.14395	3.74828	7.97802	8.07002
1999	6	22	173	9.0052	8.04561	6.77745	8.14249	8.34791	3.63445	8.06498	8.23471
1999	6	23	174	8.61011	7.7849	6.53779	7.88356	8.10838	3.65462	7.74163	8.23471
1999	6	24	175	9.23717	8.30807	6.98814	8.41	8.64212	3.85502	8.25825	8.64645
1999	6	25	176	7.89571	7.10376	5.97355	7.19206	7.38828	3.28563	7.05607	7.41124
1999	6	26	177	7.88983	7.17713	6.03148	7.25106	7.50746	3.59848	7.3358	7.08649
1999	6	27	178	6.50752	5.91941	4.98144	5.96996	6.2016	3.0517	6.21224	5.77703
1999	6	28	179	6.42038	5.83615	4.91071	5.88862	6.11129	2.98423	6.10544	5.70001
1999	6	29	180	6.94051	6.24294	5.25824	6.31229	6.50577	2.98661	6.39464	6.42307
1999	6	30	181	6.19344	5.6358	4.73821	5.69019	5.89909	2.85798	5.83895	5.54595
1999	7	1	182	8.8738	7.98439	6.72324	8.07441	8.31934	3.80824	8.1603	8.23471
1999	7	2	183	8.64499	7.72379	6.50635	7.81679	8.01399	3.48907	7.73541	7.90532
1999	7	3	184	8.72967	7.76518	6.54322	7.85889	8.03448	3.38978	7.68923	7.90532
1999	7	4	185	9.95918	8.89282	7.495	8.99761	9.22976	4.04353	8.98392	9.05818
1999	7	5	186	11.1462	10.0031	8.42381	10.1202	10.4064	4.67235	10.1416	10.2934
1999	7	6	187	8.68819	7.74779	6.52805	7.84108	8.03056	3.45732	7.75826	7.90532
1999	7	7	188	9.01441	8.17244	6.87227	8.25957	8.53928	4.03782	8.40478	8.01082
1999	7	8	189	10.6918	9.56994	8.05424	9.68893	9.93003	4.30651	9.5496	9.88165
1999	7	9	190	8.33968	7.49885	6.31346	7.58539	7.80866	3.5447	7.64167	7.74063
1999	7	10	191	9.86216	8.8454	7.45276	8.94617	9.20473	4.15731	9.05462	9.05818
1999	7	11	192	8.76071	7.8547	6.61534	7.9471	8.16742	3.64692	7.98213	8.07002
1999	7	12	193	10.7274	9.618	8.10042	9.73114	10.0009	4.46562	9.78274	9.88165
1999	7	13	194	8.58576	7.73273	6.51058	7.81905	8.06084	3.71004	7.92758	7.98767
1999	7	14	195	8.67075	7.79895	6.56438	7.89023	8.11998	3.67521	7.93189	8.07002
1999	7	15	196	8.8927	7.98311	6.72095	8.07775	8.30376	3.71714	8.07763	8.23471
1999	7	16	197	8.62339	7.71179	6.49551	7.80452	8.00563	3.50495	7.73929	7.90532
1999	7	17	198	8.34973	7.55729	6.3635	7.63034	7.90191	3.78693	7.87718	7.31757
1999	7	18	199	8.10752	7.19732	6.07159	7.28098	7.44761	3.16576	7.22613	7.24654
1999	7	19	200	8.21109	7.42187	6.24334	7.50453	7.74504	3.60293	7.61026	7.74063
1999	7	20	201	7.1516	6.412	5.40028	6.48743	6.66728	2.97708	6.51973	6.58777
1999	7	21	202	4.78258	4.3402	3.6518	4.38213	4.5406	2.1878	4.52421	4.23649
1999	7	22	203	8.35989	7.71066	6.47693	7.7456	8.11093	4.26318	8.26721	7.70271
1999	7	23	204	9.98378	9.01525	7.58459	9.11687	9.40362	4.35066	9.21116	9.38757
1999	7	24	205	8.8288	7.95939	6.70064	8.04726	8.30089	3.84132	8.18423	8.23471
1999	7	25	206	5.59829	5.0003	4.21324	5.05986	5.18896	2.26622	5.04068	5.10552
1999	7	26	207	7.74051	6.87595	5.80132	6.95539	7.12001	3.05318	6.94814	6.91716
1999	7	27	208	8.04971	7.17038	6.04774	7.25333	7.43664	3.24223	7.28429	7.24654
1999	7	28	209	10.8581	9.67647	8.15191	9.79395	10.0228	4.27691	9.67207	9.88165
1999	7	29	210	6.41217	5.7921	4.87497	5.85444	6.046	2.82831	5.96296	6.01134
1999	7	30	211	7.13648	6.41302	5.40211	6.48493	6.67989	3.04996	6.56965	6.58777
1999	7	31	212	8.53869	7.65108	6.44721	7.73881	7.95804	3.57469	7.80655	7.82297
1999	8	1	213	7.06304	6.36751	5.36051	6.43781	6.64071	3.07305	6.53126	6.58777
1999	8	2	214	5.85433	5.21482	4.39836	5.27515	5.40846	2.35798	5.28527	5.27021
1999	8	3	215	8.58365	7.70101	6.48686	7.78993	8.01268	3.60828	7.85399	7.90532
1999	8	4	216	6.30616	5.64157	4.75373	5.70769	5.86124	2.59631	5.72307	5.7643
1999	8	5	217	5.4177	4.839	4.07733	4.89664	5.02158	2.19312	4.88218	4.94083
1999	8	6	218	7.4555	6.71267	5.65323	6.78645	6.99849	3.23024	6.91186	6.91716
1999	8	7	219	6.95504	6.30751	5.30627	6.37103	6.59518	3.15244	6.55442	6.16217
1999	8	8	220	5.75451	5.1862	4.36718	5.24254	5.40948	2.51034	5.34712	5.35256
1999	8	9	221	8.51539	7.65179	6.44127	7.74196	7.96297	3.58433	7.78287	7.90532
1999	8	10	222	5.32536	4.79476	4.03802	4.84746	4.99892	2.30731	4.93919	4.94083
1999	8	11	223	6.72824	6.04645	5.09671	6.1106	6.30368	2.91841	6.2709	6.17603
1999	8	12	224	7.98804	7.19215	6.05703	7.2712	7.49839	3.46097	7.40924	7.41124
1999	8	13	225	7.52959	6.74888	5.68549	6.82727	7.01861	3.14336	6.87773	6.91716
1999	8	14	226	5.37936	4.82476	4.06514	4.87973	5.02076	2.26762	4.94311	4.94083
1999	8	15	227	4.92647	4.38954	3.70134	4.44083	4.55184	1.97835	4.44389	4.44674
1999	8	16	228	6.29167	5.63764	4.75057	5.70228	5.86382	2.63398	5.76239	5.7643
1999	8	17	229	5.46252	4.87803	4.11397	4.93343	5.06769	2.25282	4.9933	4.94083
1999	8	18	230	4.89692	4.41344	3.71895	4.45839	4.60742	2.16746	4.60309	4.52909
1999	8	19	231	6.23231	5.67859	4.77894	5.72279	5.95446	2.96838	6.03338	5.54595
1999	8	20	232	5.22615	4.67844	3.94274	4.73238	4.86374	2.17285	4.77977	4.77613
1999	8	21	233	8.92419	8.03005	6.76622	8.11556	8.37432	3.88701	8.32115	8.23471
1999	8	22	234	6.97561	6.26244	5.27587	6.33326	6.51996	2.96081	6.42095	6.42307
1999	8	23	235	5.40744	4.8439	4.08278	4.89872	5.03896	2.27015	4.96908	4.94083
1999	8	24	236	5.14017	4.75309	3.99047	4.772	5.00169	2.65082	5.09775	4.77568
1999	8	25	237	5.28162	4.75987	4.00545	4.81466	4.96042	2.26998	4.84751	4.94083
1999	8	26	238	6.27782	5.88856	4.93921	5.86417	6.21194	3.56403	6.52027	6.00811
1999	8	27	239	5.47518	5.19228	4.34877	5.14121	5.47595	3.28816	5.8128	5.3919
1999	8	28	240	5.38085	5.17588	4.32163	5.09922	5.4452	3.39966	5.78148	5.54595
1999	8	29	241	7.4356	7.19127	6.00684	7.03576	7.55277	4.90395	8.19713	7.70271
1999	8	30	242	8.18651	7.68767	6.44744	7.65109	8.11025	4.67753	8.5157	7.85676
1999	8	31	243	8.80989	7.96066	6.70293	8.04206	8.31552	3.93242	8.2564	8.23471
1999	9	1	244	5.2827	4.764	4.00953	4.81744	4.9677	2.29234	4.86838	4.94083
1999	9	2	245	6.5568	5.94237	5.00177	5.9998	6.21506	2.98652	6.18635	5.77703
1999	9	3	246	7.01048	6.34302	5.33883	6.40799	6.62769	3.14257	6.56396	6.58777
1999	9	4	247	6.26017	5.62014	4.73475	5.6837	5.85125	2.65714	5.74462	5.7643
1999	9	5	248	5.1087	4.61319	3.88376	4.66198	4.81608	2.25918	4.75887	4.77613
1999	9	6	249	5.29944	4.7839	4.02854	4.8336	4.99498	2.34953	4.95106	4.94083
1999	9	7	250	4.77175	4.37468	3.67899	4.40047	4.5964	2.36431	4.67688	4.31352
1999	9	8	251	5.48162	4.98452	4.19581	5.026	5.22282	2.57649	5.26149	4.85271
1999	9	9	252	5.91423	5.37075	4.51957	5.42034	5.62172	2.73027	5.61372	5.23784
1999	9	10	253	4.61718	4.16262	3.50668	4.20577	4.34499	2.03845	4.31374	4.28205
1999	9	11	254	5.32536	4.79476	4.03802	4.84746	4.99892	2.30731	4.92097	4.94083
1999	9	12	255	6.87568	5.96621	5.048	6.01059	6.08018	2.23175	5.75128	5.7643
1999	9	13	256	4.4612	4.01158	3.37971	4.05547	4.18106	1.92486	4.11422	4.11735
1999	9	14	257	2.79147	2.4707	2.08546	2.49884	2.55283	1.07058	2.46823	2.47041
1999	9	15	258	3.34225	2.98915	2.51938	3.02376	3.106	1.38001	3.02342	3.04684
1999	9	16	259	3.87576	3.54097	2.97973	3.56453	3.71733	1.8869	3.77554	3.46622
1999	9	17	260	3.2464	3.03477	2.54649	3.02758	3.20068	1.80786	3.33146	3.08108
1999	9	18	261	4.21639	3.88441	3.26561	3.8989	4.08755	2.1627	4.19293	3.85135
1999	9	19	262	4.07583	3.64417	3.07225	3.68587	3.78719	1.68773	3.70572	3.70562
1999	9	20	263	5.50086	4.89226	4.12616	4.94938	5.06782	2.17832	4.90892	4.94083
1999	9	21	264	3.54268	3.19702	2.69293	3.22965	3.33854	1.57465	3.30855	3.29388
1999	9	22	265	2.45505	2.28733	1.92004	2.2857	2.4115	1.34101	2.50196	2.31081
1999	9	23	266	3.26772	3.11065	2.60548	3.06852	3.27963	2.0181	3.52401	3.23514
1999	9	24	267	4.58376	4.27354	3.58787	4.26691	4.50667	2.5241	4.69775	4.31352
1999	9	25	268	8.35468	7.60207	6.40014	7.66165	7.9695	3.96188	8.05608	7.3946
1999	9	26	269	4.93817	4.59379	3.85771	4.59159	4.84304	2.68455	5.03627	4.62163
1999	9	27	270	4.3049	4.09101	3.4281	4.03741	4.31447	2.64507	4.64606	4.23649
1999	9	28	271	2.91267	2.76139	2.31454	2.72941	2.91299	1.76717	3.1259	2.85
1999	9	29	272	4.55909	4.37966	3.66379	4.29623	4.60885	2.94002	5.01297	4.62163
1999	9	30	273	3.26259	3.18178	2.65322	3.10094	3.33152	2.21598	3.64355	3.10082
1999	10	1	274	2.31841	2.11749	1.78112	2.13323	2.22163	1.11647	2.24606	2.07973
1999	10	2	275	5.38275	4.76544	4.02139	4.8201	4.92306	2.05775	4.75036	4.77613
1999	10	3	276	4.53905	4.05189	3.41587	4.09911	4.20604	1.84834	4.09311	4.11735
1999	10	4	277	3.25386	2.9158	2.45863	2.94769	3.03556	1.38298	3.00386	2.9645
1999	10	5	278	3.46164	3.09727	2.61326	3.13052	3.22386	1.46929	3.21031	3.12919
1999	10	6	279	3.1556	2.83043	2.38638	2.86111	2.94808	1.35035	2.92011	2.88215
1999	10	7	280	3.6244	3.24477	2.73633	3.28055	3.37642	1.53003	3.33619	3.29388
1999	10	8	281	3.35257	3.00142	2.5311	3.03451	3.12319	1.41527	3.08763	3.04684
1999	10	9	282	3.242	2.84965	2.40887	2.87985	2.93415	1.19512	2.8491	2.7998
1999	10	10	283	1.32202	1.19616	1.00748	1.20749	1.25088	0.601047	1.24711	1.15541
1999	10	11	284	2.24792	2.01689	1.70003	2.03906	2.10043	0.959349	2.06314	2.05868
1999	10	12	285	2.03061	2.0321	1.68743	1.94718	2.09408	1.52559	2.30739	2.06721
1999	10	13	286	3.68593	3.48888	2.922	3.46072	3.67962	2.18247	3.84511	3.62027
1999	10	14	287	3.33712	3.08753	2.59441	3.09365	3.25206	1.75662	3.34712	3.08108
1999	10	15	288	2.63622	2.38445	2.00749	2.40841	2.4918	1.18469	2.45552	2.47041
1999	10	16	289	3.50524	3.17151	2.66941	3.204	3.31384	1.57129	3.25705	3.29388
1999	10	17	290	2.87014	2.57761	2.17242	2.60569	2.68565	1.23326	2.63966	2.63511
1999	10	18	291	2.2855	2.03187	1.71301	2.05597	2.10301	0.893126	2.00668	2.05868
1999	10	19	292	1.34536	1.23991	1.0421	1.24486	1.30459	0.688747	1.33003	1.23243
1999	10	20	293	2.67726	2.40901	2.02987	2.43467	2.5123	1.1661	2.47536	2.47041
1999	10	21	294	2.68455	2.41483	2.0353	2.44014	2.51871	1.17233	2.49524	2.47041
1999	10	22	295	1.8077	1.61989	1.3659	1.6376	1.68642	0.768321	1.66356	1.64694
1999	10	23	296	2.33927	2.07205	1.75033	2.09511	2.14462	0.921159	2.10877	2.05868
1999	10	24	297	1.41981	1.2775	1.07572	1.29191	1.33109	0.609319	1.29159	1.31755
1999	10	25	298	2.66376	2.40151	2.02309	2.42641	2.50672	1.17603	2.47232	2.47041
1999	10	26	299	2.27901	2.18776	1.82986	2.14878	2.3027	1.45882	2.47218	2.31081
1999	10	27	300	2.07014	1.95343	1.63818	1.93645	2.06131	1.2246	2.19226	2.0027
1999	10	28	301	2.33007	2.12238	1.78538	2.14043	2.2241	1.09748	2.2075	2.07973
1999	10	29	302	2.08197	2.01356	1.68191	1.97001	2.11478	1.37311	2.2759	2.15676
1999	10	30	303	2.45197	2.34341	1.96052	2.31035	2.46882	1.52827	2.61758	2.46487
1999	10	31	304	2.67545	2.67519	2.21733	2.58407	2.76675	1.94957	2.92699	2.75628
2000	4	1	91	5.03375	4.65042	3.90924	4.66049	4.89775	2.63746	5.05869	4.62163
2000	4	2	92	3.00448	2.87447	2.39907	2.84984	3.02657	1.81582	3.08953	3.08108
2000	4	3	93	4.72061	4.21396	3.5525	4.26307	4.37428	1.92227	4.22942	4.28205
2000	4	4	94	3.97647	3.5044	2.96143	3.54257	3.61453	1.49716	3.51232	3.45858
2000	4	5	95	0.940064	0.83175	0.702828	0.840926	0.860529	0.368607	0.849075	0.823471
2000	4	6	96	0.44405	0.400597	0.337521	0.404612	0.418387	0.197868	0.415127	0.411735
2000	4	7	97	2.77021	2.50137	2.1015	2.53282	2.60449	1.17082	2.41483	2.63511
2000	4	8	98	4.92246	4.41555	3.71179	4.47293	4.58119	1.9725	4.16689	4.61144
2000	4	9	99	2.73261	2.4221	2.03999	2.45121	2.49753	1.00961	2.22934	2.47041
2000	4	10	100	1.3049	1.2146	1.01895	1.21608	1.27969	0.699958	1.27796	1.23243
2000	4	11	101	2.13101	1.92121	1.61847	1.94112	2.00538	0.940821	1.95828	1.97633
2000	4	12	102	2.34894	2.21249	1.85084	2.20973	2.33145	1.31477	2.30444	2.31081
2000	4	13	103	4.9112	4.49049	3.75579	4.55452	4.68387	2.12532	4.23482	4.62163
2000	4	14	104	4.49631	3.9987	3.36495	4.04878	4.12881	1.68674	3.74516	4.11735
2000	4	15	105	4.17789	3.70352	3.12616	3.74574	3.83144	1.63008	3.70315	3.70562
2000	4	16	106	3.60725	3.242	2.73447	3.27441	3.38281	1.58689	3.39629	3.29388
2000	4	17	107	5.34289	5.09818	4.26171	5.04541	5.37136	3.25028	5.59532	5.3919
2000	4	18	108	4.47541	4.28018	3.56874	4.25598	4.50559	2.6541	4.55656	4.62163
2000	4	19	109	4.01064	3.56026	2.99179	3.60498	3.66332	1.42295	3.23232	3.70562
2000	4	20	110	2.04807	1.79944	1.51687	1.81802	1.84423	0.69943	1.63528	1.81164
2000	4	21	111	0.761023	0.669506	0.565889	0.676673	0.689756	0.282527	0.667837	0.658777
2000	4	22	112	0.386812	0.338253	0.286109	0.341551	0.347049	0.136633	0.333811	0.329388
2000	4	23	113	0.564125	0.498792	0.421434	0.504314	0.5157	0.219094	0.505487	0.494083
2000	4	24	114	1.70015	1.49964	1.26715	1.51609	1.54764	0.644617	1.50263	1.48225
2000	4	25	115	1.83956	1.63876	1.38308	1.6571	1.70126	0.752624	1.66927	1.64694
2000	4	26	116	1.82192	1.63014	1.3754	1.64764	1.69677	0.773311	1.68546	1.64694
2000	4	27	117	2.45397	2.2832	1.91596	2.28529	2.40583	1.31864	2.45687	2.31081
2000	4	28	118	3.72124	3.29151	2.77789	3.32903	3.39849	1.41252	3.24119	3.29388
2000	4	29	119	3.78807	3.36407	2.83901	3.40259	3.48401	1.49875	3.36504	3.37623
2000	4	30	120	1.72159	1.54127	1.29976	1.55826	1.6038	0.726763	1.5739	1.56459
2000	5	1	121	1.43565	1.29101	1.08839	1.30432	1.34674	0.62856	1.33834	1.31755
2000	5	2	122	3.86875	3.47793	2.93282	3.5132	3.62855	1.69817	3.6263	3.54093
2000	5	3	123	3.54412	3.20253	2.69837	3.23287	3.34807	1.60448	3.34969	3.29388
2000	5	4	124	1.7186	1.55861	1.30937	1.57674	1.62698	0.756601	1.54982	1.64694
2000	5	5	125	3.68992	3.25998	2.74803	3.29742	3.35685	1.34289	3.08157	3.29388
2000	5	6	126	1.53256	1.34391	1.13611	1.35767	1.3811	0.551151	1.32415	1.31755
2000	5	7	127	1.28479	1.14635	0.967527	1.15892	1.19144	0.534372	1.1798	1.15286
2000	5	8	128	0.863529	0.788132	0.663291	0.793624	0.827105	0.417657	0.83594	0.770271
2000	5	9	129	2.39218	2.19084	1.84266	2.20451	2.30116	1.17752	2.32227	2.15676
2000	5	10	130	4.31916	4.12654	3.45498	4.06064	4.34801	2.71859	4.68597	4.31352
2000	5	11	131	4.85717	4.54879	3.81703	4.53128	4.79885	2.74409	5.02327	4.62163
2000	5	12	132	3.28383	3.06028	2.57	3.05462	3.22761	1.81123	3.37475	3.08108
2000	5	13	133	5.8763	5.29613	4.46273	5.35007	5.52891	2.60095	5.48887	5.43491
2000	5	14	134	5.16402	4.65417	3.9218	4.70158	4.85874	2.28568	4.82276	4.77613
2000	5	15	135	4.12969	3.68469	3.10991	3.7251	3.82964	1.71762	3.79701	3.70562
2000	5	16	136	3.6244	3.24477	2.73633	3.28055	3.37642	1.53003	3.3278	3.29388
2000	5	17	137	4.28146	3.72516	3.15015	3.75571	3.80285	1.41552	3.57017	3.62327
2000	5	18	138	2.60355	2.36983	1.99462	2.38893	2.48405	1.23186	2.49204	2.31081
2000	5	19	139	3.5398	3.186	2.68206	3.22246	3.31918	1.515	3.20662	3.29388
2000	5	20	140	5.13911	4.60955	3.88638	4.65952	4.80117	2.19914	4.73883	4.69378
2000	5	21	141	3.97773	3.56678	3.00798	3.60489	3.71558	1.70671	3.68466	3.62327
2000	5	22	142	4.49764	4.04066	3.40686	4.08287	4.21315	1.95598	4.18769	4.11735
2000	5	23	143	10.871	9.72606	8.20083	9.83542	10.1143	4.54534	9.90089	9.88165
2000	5	24	144	2.69751	2.42026	2.04004	2.44687	2.52051	1.15122	2.47883	2.47041
2000	5	25	145	3.54124	3.19151	2.68749	3.22618	3.32891	1.54482	3.24806	3.29388
2000	5	26	146	4.17139	3.85941	3.24301	3.86706	4.06507	2.19578	4.18318	3.85135
2000	5	27	147	6.18824	5.74645	4.82551	5.75122	6.05551	3.31532	6.23633	5.77703
2000	5	28	148	4.96409	4.60466	3.86719	4.61074	4.85141	2.64234	4.99368	4.62163
2000	5	29	149	5.01216	4.51154	3.80302	4.5574	4.70839	2.20922	4.69499	4.61144
2000	5	30	150	6.20094	5.5996	4.71738	5.65476	5.85081	2.78174	5.82619	5.7643
2000	5	31	151	5.58135	5.09766	4.28787	5.13555	5.34838	2.6878	5.37417	5.00676
2000	6	1	152	4.93709	4.58966	3.85363	4.59117	4.83734	2.66218	5.00135	4.62163
2000	6	2	153	5.04762	4.59292	3.86675	4.62891	4.81491	2.39363	4.86528	4.46757
2000	6	3	154	5.1342	4.6815	3.93495	4.72447	4.90394	2.40149	4.84374	4.62163
2000	6	4	155	5.24867	4.76629	4.01365	4.80614	4.99292	2.45633	5.02942	4.62163
2000	6	5	156	4.463	4.01847	3.38651	4.06001	4.19323	1.96215	4.1681	4.11735
2000	6	6	157	5.35236	4.80976	4.05158	4.8637	5.00992	2.28747	4.90284	4.94083
2000	6	7	158	5.73568	5.1376	4.32745	5.19831	5.33951	2.37108	5.16012	5.27021
2000	6	8	159	6.79812	6.1071	5.14575	6.17459	6.36215	2.91323	6.2593	6.25838
2000	6	9	160	4.85178	4.52813	3.79664	4.53036	4.77167	2.63224	4.89694	4.62163
2000	6	10	161	5.57885	5.18843	4.35514	5.19166	5.46777	3.00303	5.63893	5.23784
2000	6	11	162	6.41935	6.02404	5.05138	6.00098	6.35411	3.63882	6.63683	6.16217
2000	6	12	163	5.91996	5.45174	4.58452	5.47064	5.73754	3.04231	5.914	5.3919
2000	6	13	164	6.16301	6.44306	5.32647	5.89477	6.16095	5.5691	7.90954	6.89071
2000	6	14	165	7.27768	7.5363	6.2184	7.06308	7.48381	6.1121	8.91903	8.13104
2000	6	15	166	8.98765	8.87275	7.38491	8.57758	9.23117	6.41949	10.2806	8.82011
2000	6	16	167	10.3569	10.0713	8.41598	9.77934	10.5496	7.12062	11.7744	9.64699
2000	6	17	168	6.94567	6.33057	5.32985	6.37514	6.64215	3.34462	6.76034	6.16217
2000	6	18	169	8.52834	7.59812	6.40267	7.6895	7.87129	3.36975	7.56888	7.74063
2000	6	19	170	5.26036	5.03997	4.20789	4.9854	5.30609	3.22988	5.53164	5.3919
2000	6	20	171	8.28229	8.21015	6.82294	7.9402	8.52777	5.93854	9.26659	8.26885
2000	6	21	172	6.38623	6.01506	5.04417	5.97288	6.34677	3.72493	6.70765	6.16217
2000	6	22	173	6.95597	6.48077	5.4401	6.47615	6.83259	3.79954	7.08524	6.5473
2000	6	23	174	9.14638	8.45423	7.09976	8.48552	8.8975	4.72588	9.06113	8.47298
2000	6	24	175	7.52714	6.95199	5.84147	6.97391	7.31828	3.90397	7.51229	6.93244
2000	6	25	176	7.03135	6.36404	5.35874	6.42555	6.65424	3.18899	6.63898	6.16217
2000	6	26	177	7.24592	6.47853	5.46178	6.55267	6.73279	3.0004	6.60141	6.58777
2000	6	27	178	8.11115	7.26584	6.12417	7.34808	7.55844	3.40522	7.42192	7.41124
2000	6	28	179	5.51652	4.90803	4.14109	4.96428	5.0884	2.21313	4.97946	4.94083
2000	6	29	180	5.40852	4.84803	4.08685	4.90179	5.04643	2.29252	4.98461	4.94083
2000	6	30	181	7.40484	6.70431	5.64758	6.76506	7.01478	3.39718	7.05112	6.47028
2000	7	1	182	8.58849	7.84943	6.60352	7.90353	8.23934	4.17236	8.34316	7.70271
2000	7	2	183	7.16023	6.44506	5.43289	6.51057	6.72628	3.15603	6.72144	6.58777
2000	7	3	184	5.96469	5.46835	4.59873	5.50059	5.74551	2.95538	5.85377	5.3919
2000	7	4	185	9.02857	8.4082	7.06003	8.39972	8.86571	4.93987	9.24384	8.47298
2000	7	5	186	10.0405	9.28585	7.80493	9.30168	9.78184	5.29477	10.1435	9.24325
2000	7	6	187	5.9502	5.46442	4.59558	5.49129	5.7455	2.99306	5.88462	5.3919
2000	7	7	188	7.01767	6.37057	5.36601	6.42248	6.67434	3.2917	6.7628	6.16217
2000	7	8	189	8.94893	8.20976	6.90523	8.25317	8.62953	4.47222	8.83582	8.08785
2000	7	9	190	9.20182	8.50445	7.14704	8.52518	8.95568	4.81253	9.25529	8.47298
2000	7	10	191	9.19419	8.18005	6.90182	8.2738	8.48066	3.68856	8.31488	8.23471
2000	7	11	192	6.4857	5.76192	4.86452	5.82674	5.97235	2.59945	5.88624	5.7643
2000	7	12	193	6.81532	6.10366	5.14928	6.16858	6.35616	2.91232	6.34217	6.17603
2000	7	13	194	8.07551	7.26194	6.12217	7.33681	7.57539	3.53565	7.57022	7.41124
2000	7	14	195	7.35823	6.55506	5.53233	6.62839	6.80504	3.0105	6.72499	6.58777
2000	7	15	196	5.47602	4.88553	4.12075	4.94122	5.07291	2.2429	4.98935	4.94083
2000	7	16	197	8.88279	8.01882	6.75721	8.0963	8.37969	3.99465	8.40533	8.23471
2000	7	17	198	8.05364	7.24449	6.10589	7.32041	7.55614	3.51698	7.5202	7.41124
2000	7	18	199	5.40959	4.85216	4.09093	4.90475	5.05386	2.31489	5.01527	4.94083
2000	7	19	200	6.2967	5.65692	4.7696	5.71602	5.8984	2.73837	5.88437	5.7643
2000	7	20	201	7.50906	6.78304	5.71287	6.85112	7.08637	3.36019	7.0606	6.9995
2000	7	21	202	7.85438	7.14439	6.01642	7.19881	7.49066	3.73293	7.60442	6.93244
2000	7	22	203	8.83959	8.00071	6.74141	8.07161	8.37231	4.06501	8.45004	7.70271
2000	7	23	204	5.28917	4.78879	4.03399	4.83219	5.01055	2.42656	5.03819	4.62163
2000	7	24	205	7.17967	6.46057	5.44737	6.52512	6.74339	3.17263	6.75988	6.58777
2000	7	25	206	7.03451	6.384	5.37855	6.43486	6.68916	3.30607	6.79502	6.16217
2000	7	26	207	6.22047	5.62282	4.73956	5.67277	5.88235	2.84845	5.95	5.3919
2000	7	27	208	10.5513	9.56258	8.05442	9.64711	10.0094	4.87296	10.0888	9.24325
2000	7	28	209	7.99289	7.21074	6.07538	7.28301	7.53097	3.56163	7.52604	7.41124
2000	7	29	210	7.16051	6.454	5.44183	6.51533	6.74325	3.21346	6.79529	6.58777
2000	7	30	211	7.14251	6.444	5.43279	6.50403	6.73569	3.22669	6.79526	6.58777
2000	7	31	212	7.95239	7.18824	6.05504	7.25771	7.5139	3.5914	7.53187	7.41124
2000	8	1	213	8.49849	7.79943	6.55832	7.84263	8.19721	4.23851	8.35878	7.70271
2000	8	2	214	4.67412	4.42237	3.70035	4.39862	4.66226	2.7165	4.86164	4.62163
2000	8	3	215	8.89876	8.8993	7.40045	8.48755	9.15446	6.78872	10.5248	8.95792
2000	8	4	216	12.9597	12.6449	10.5355	12.3506	13.2421	8.72215	14.428	12.4033
2000	8	5	217	9.90376	9.216	7.74238	9.20163	9.71958	5.4354	10.1923	9.24325
2000	8	6	218	12.1214	11.067	9.31754	11.1358	11.6209	5.92455	11.8912	10.7838
2000	8	7	219	8.37266	7.55591	6.36879	7.62752	7.89701	3.77447	7.94654	7.74063
2000	8	8	220	8.97279	8.06882	6.80241	8.15201	8.4171	3.9285	8.40732	8.23471
2000	8	9	221	5.27567	4.78129	4.02721	4.82355	5.00472	2.43648	5.04503	4.62163
2000	8	10	222	5.39825	4.85292	4.0923	4.90215	5.06309	2.36955	5.07193	4.94083
2000	8	11	223	8.01638	7.23439	6.09778	7.30294	7.56097	3.61386	7.6079	7.41124
2000	8	12	224	2.72613	2.44146	2.05971	2.46743	2.54247	1.16493	2.53618	2.47041
2000	8	13	225	9.04064	8.1175	6.84748	8.19982	8.46621	3.95068	8.49396	8.23471
2000	8	14	226	4.53229	4.06285	3.4272	4.10563	4.23294	1.94981	4.22675	4.11735
2000	8	15	227	5.88745	5.43725	4.57176	5.44773	5.72701	3.08962	5.94596	5.3919
2000	8	16	228	8.14209	7.61321	6.39111	7.58609	8.03204	4.57768	8.45588	7.70271
2000	8	17	229	10.7155	9.66085	8.14393	9.75416	10.0926	4.79863	10.1448	9.88165
2000	8	18	230	9.06459	8.12571	6.85441	8.21127	8.46588	3.89963	8.45332	8.23471
2000	8	19	231	8.67695	7.77546	6.55634	7.8605	8.09482	3.68794	8.02752	7.90532
2000	8	20	232	3.61683	3.24528	2.73724	3.27907	3.38272	1.56647	3.381	3.29388
2000	8	21	233	1.78113	1.6085	1.35594	1.62317	1.68202	0.809981	1.69877	1.64694
2000	8	22	234	1.73613	1.5835	1.33334	1.59385	1.66219	0.843057	1.69884	1.54054
2000	8	23	235	6.05688	5.40422	4.5612	5.46348	5.61681	2.51918	5.58002	5.43491
2000	8	24	236	7.48684	6.68818	5.64284	6.76198	6.95373	3.12644	6.89603	6.75246
2000	8	25	237	4.49854	4.0441	3.41025	4.08512	4.21925	1.97462	4.22675	4.11735
2000	8	26	238	4.35995	3.95533	3.32886	3.99273	4.13851	1.99929	4.1316	3.85135
2000	8	27	239	5.37125	4.83792	4.07874	4.88549	5.05195	2.38939	5.06885	4.94083
2000	8	28	240	4.02968	3.9284	3.28016	3.81326	4.11107	2.78366	4.56801	3.78989
2000	8	29	241	6.17051	5.904	4.94463	5.79594	6.21906	3.94113	6.79443	6.16217
2000	8	30	242	7.01517	6.528	5.48419	6.51782	6.88471	3.85008	7.21908	6.5473
2000	8	31	243	3.8321	3.66502	3.06671	3.60904	3.86076	2.40657	4.15439	3.85135
2000	9	1	244	3.99521	3.81096	3.18819	3.76459	4.016	2.45546	4.26073	4.00541
2000	9	2	245	10.9217	10.0385	8.43172	10.1043	10.5451	5.4022	10.5882	10.0135
2000	9	3	246	7.92405	7.146	6.01429	7.22617	7.45155	3.43852	7.30322	7.41124
2000	9	4	247	5.33886	4.80226	4.0448	4.85561	5.00444	2.29739	4.92658	4.94083
2000	9	5	248	5.36586	4.81726	4.05836	4.87174	5.01536	2.27755	4.92528	4.94083
2000	9	6	249	5.33346	4.7816	4.02442	4.84019	4.96729	2.18555	4.78686	4.94083
2000	9	7	250	4.90147	4.4605	3.7421	4.51477	4.65744	2.1652	4.4628	4.46757
2000	9	8	251	4.65883	4.27145	3.58965	4.30126	4.48485	2.27876	4.5021	4.23649
2000	9	9	252	6.40357	5.85283	4.9204	5.8991	6.13912	3.07019	6.14054	5.77703
2000	9	10	253	4.78536	4.49476	3.76682	4.48042	4.73991	2.70422	4.92756	4.62163
2000	9	11	254	4.58557	4.23399	3.5561	4.25144	4.45491	2.35384	4.53535	4.23649
2000	9	12	255	5.16012	4.69237	3.94443	4.73969	4.909	2.35928	4.82923	4.62163
2000	9	13	256	6.1474	5.54925	4.66987	5.61079	5.78913	2.68598	5.66387	5.7643
2000	9	14	257	5.36154	4.80073	4.04205	4.85901	4.98542	2.18807	4.79817	4.94083
2000	9	15	258	4.97134	4.47897	3.77262	4.52684	4.67246	2.17437	4.61156	4.61144
2000	9	16	259	5.32644	4.7989	4.0421	4.85019	5.0062	2.32968	4.94622	4.94083
2000	9	17	260	3.5398	3.186	2.68206	3.22246	3.31918	1.515	3.2371	3.29388
2000	9	18	261	1.69898	1.55713	1.30895	1.56761	1.63513	0.83279	1.64728	1.54054
2000	9	19	262	5.13744	4.6939	3.94718	4.72989	4.92413	2.4686	4.9519	4.62163
2000	9	20	263	4.1237	3.82408	3.21021	3.83312	4.02725	2.17293	4.1298	3.85135
2000	9	21	264	4.82802	4.52553	3.79531	4.51093	4.77319	2.71919	4.98743	4.62163
2000	9	22	265	6.87941	6.82929	5.67449	6.59678	7.08636	4.96532	7.88189	6.89071
2000	9	23	266	6.63392	6.13853	5.15442	6.15859	6.46188	3.45023	6.61271	6.16217
2000	9	24	267	4.3226	3.92281	3.29833	3.96392	4.1006	1.94953	4.03567	3.85135
2000	9	25	268	7.0616	6.362	5.35508	6.43412	6.63101	3.04323	6.48307	6.58777
2000	9	26	269	6.75416	6.18649	5.19596	6.23805	6.4888	3.23832	6.42008	6.16217
2000	9	27	270	4.1228	3.82064	3.20682	3.8325	4.02229	2.15429	4.08418	3.85135
2000	9	28	271	3.51136	3.16549	2.66306	3.20248	3.29839	1.50502	3.16041	3.29388
2000	9	29	272	4.56155	4.06439	3.42717	4.11188	4.21467	1.8318	4.05565	4.11735
2000	9	30	273	1.52876	1.40018	1.17683	1.4104	1.46966	0.7428	1.46284	1.38649
2000	10	1	274	4.1696	3.85252	3.23621	3.86572	4.05501	2.1585	4.13051	3.85135
2000	10	2	275	3.1258	2.956	2.47414	2.93913	3.11673	1.8193	3.22285	3.08108
2000	10	3	276	2.40726	2.25901	1.89427	2.25037	2.38279	1.36456	2.48255	2.31081
2000	10	4	277	4.44354	4.29073	3.58101	4.21601	4.50951	2.86282	4.79653	4.62163
2000	10	5	278	5.18287	5.00104	4.17309	4.92019	5.2572	3.31386	5.57184	5.3919
2000	10	6	279	6.12704	5.84751	4.89043	5.77839	6.16135	3.76103	6.52003	6.16217
2000	10	7	280	6.8096	6.222	5.22852	6.27587	6.52237	3.22845	6.46695	6.16217
2000	10	8	281	3.00023	2.66701	2.24699	2.69932	2.75756	1.15293	2.59096	2.71745
2000	10	9	282	2.07399	1.87964	1.57994	1.90075	1.96264	0.917878	1.8894	1.97633
2000	10	10	283	3.39059	2.95686	2.50027	2.98332	3.02474	1.1506	2.86298	2.88215
2000	10	11	284	1.97699	1.77031	1.49154	1.79098	1.84016	0.819621	1.77543	1.81164
2000	10	12	285	2.54226	2.33401	1.96207	2.34753	2.45275	1.26533	2.47509	2.31081
2000	10	13	286	4.17635	3.84156	3.22488	3.86873	4.03443	2.05703	3.99348	3.85135
2000	10	14	287	4.31665	4.20257	3.49961	4.12182	4.40619	2.84028	4.61769	4.62163
2000	10	15	288	3.85506	3.64245	3.0429	3.64064	3.83658	2.15807	3.83266	3.85135
2000	10	16	289	3.86486	3.58552	3.0091	3.59503	3.77556	2.03281	3.83479	3.62027
2000	10	17	290	3.41452	3.11875	2.6215	3.14503	3.26974	1.62252	3.23822	3.08108
2000	10	18	291	5.29296	4.7591	4.00408	4.81672	4.95119	2.21531	4.72547	4.94083
2000	10	19	292	3.39796	3.11426	2.61789	3.13522	3.27026	1.66558	3.27938	3.08108
2000	10	20	293	1.90562	1.67075	1.41155	1.68771	1.71508	0.673185	1.61532	1.64694
2000	10	21	294	0.8107	0.75525	0.633225	0.756615	0.795528	0.433325	0.796512	0.770271
2000	10	22	295	4.02182	3.70051	3.10783	3.72346	3.88843	2.0026	3.84605	3.6973
2000	10	23	296	3.31768	3.07202	2.57993	3.07983	3.23494	1.74003	3.27989	3.08108
2000	10	24	297	1.7456	1.57361	1.32293	1.59297	1.6382	0.736756	1.50867	1.64694
2000	10	25	298	1.83553	1.66242	1.39907	1.67914	1.73775	0.828398	1.6892	1.61757
2000	10	26	299	1.7402	1.58239	1.332	1.59555	1.65804	0.817935	1.65581	1.54054
2000	10	27	300	2.17997	1.97766	1.66443	1.99636	2.06926	0.999643	2.03835	1.92568
2000	10	28	301	0.88288	0.795939	0.670064	0.804726	0.830089	0.384132	0.801178	0.823471
2000	10	29	302	2.34737	2.06625	1.74409	2.08867	2.12537	0.847647	1.98119	2.05868
2000	10	30	303	3.7239	3.40504	2.85976	3.43613	3.56848	1.75739	3.44149	3.38919
2000	10	31	304	3.49547	3.31115	2.77018	3.29115	3.49064	2.04482	3.54569	3.46622
2001	4	1	91	3.95511	3.72805	3.11528	3.73049	3.9263	2.18436	3.90858	3.92838
2001	4	2	92	2.32353	2.04858	1.72769	2.0714	2.10736	0.836223	1.94985	2.05868
2001	4	3	93	1.34694	1.2342	1.0363	1.24478	1.29434	0.644345	1.2582	1.23243
2001	4	4	94	2.17773	1.96906	1.65594	1.99136	2.0545	0.95304	1.94852	2.05868
2001	4	5	95	3.47608	3.14824	2.6477	3.18235	3.28817	1.54639	3.13862	3.29388
2001	4	6	96	3.49589	3.1357	2.63408	3.17775	3.25012	1.37742	2.87849	3.29388
2001	4	7	97	2.72039	2.47558	2.07836	2.50369	2.58704	1.2198	2.41148	2.46487
2001	4	8	98	1.84175	1.69	1.41844	1.70443	1.77272	0.885049	1.70167	1.6946
2001	4	9	99	2.14375	1.91699	1.61356	1.94082	1.9881	0.857332	1.8461	1.97633
2001	4	10	100	2.80851	2.53019	2.12828	2.56043	2.63481	1.19209	2.47596	2.63511
2001	4	11	101	3.03614	2.77152	2.32595	2.80139	2.89976	1.39014	2.69456	2.77298
2001	4	12	102	1.66388	1.52586	1.27954	1.54124	1.5986	0.781379	1.49474	1.54054
2001	4	13	103	2.41385	2.19134	1.842	2.21477	2.29034	1.08593	2.18396	2.15676
2001	4	14	104	4.22012	3.78806	3.18479	3.83672	3.93276	1.70861	3.58737	3.95266
2001	4	15	105	3.3742	3.08223	2.58711	3.11405	3.22651	1.55951	3.02735	3.08108
2001	4	16	106	2.1928	1.97154	1.65762	1.99646	2.0492	0.903355	1.88739	2.05868
2001	4	17	107	1.45668	1.32153	1.10989	1.33716	1.37929	0.639584	1.28496	1.3999
2001	4	18	108	3.04424	2.77602	2.33002	2.80651	2.90334	1.38418	2.74398	2.77298
2001	4	19	109	3.38861	3.07845	2.58256	3.11739	3.21117	1.47171	2.97125	3.29388
2001	4	20	110	2.5806	2.34825	1.97425	2.37091	2.45796	1.19082	2.3939	2.31081
2001	4	21	111	3.32178	3.04128	2.55685	3.06274	3.1926	1.61749	3.19107	3.00406
2001	4	22	112	2.48221	2.34137	1.95686	2.34078	2.46635	1.38251	2.46099	2.46487
2001	4	23	113	4.04565	3.69236	3.0905	3.74375	3.85089	1.74791	3.51491	3.77433
2001	4	24	114	4.00896	3.71618	3.10841	3.74986	3.90054	1.96774	3.61099	3.85135
2001	4	25	115	3.50885	3.24001	2.71407	3.26789	3.40061	1.71371	3.19814	3.31217
2001	4	26	116	5.06023	4.61921	3.87659	4.66898	4.83294	2.31689	4.53697	4.62163
2001	4	27	117	4.58239	4.18566	3.51581	4.22496	4.38499	2.14787	4.25457	4.15946
2001	4	28	118	2.26679	2.22358	1.85055	2.16673	2.32345	1.5532	2.47205	2.20503
2001	4	29	119	4.17674	4.03127	3.3594	3.98049	4.23763	2.62045	4.38621	4.39054
2001	4	30	120	5.71809	5.57792	4.64263	5.46756	5.84435	3.78367	6.19437	5.51257
2001	5	1	121	5.76643	5.3265	4.45165	5.39005	5.57845	2.69933	5.23882	5.54595
2001	5	2	122	2.89468	2.88362	2.39042	2.79681	2.9914	2.06554	3.1467	2.96301
2001	5	3	123	7.93265	7.46828	6.24944	7.45652	7.87083	4.44735	7.85687	7.77974
2001	5	4	124	3.69403	3.44106	2.88161	3.45569	3.62102	1.93037	3.51957	3.54325
2001	5	5	125	3.2788	3.041	2.55098	3.05218	3.20072	1.70684	3.1933	3.08108
2001	5	6	126	3.31264	3.05274	2.56091	3.07489	3.20614	1.63564	3.12541	3.08108
2001	5	7	127	3.65178	3.28198	2.7563	3.32612	3.40523	1.46018	3.09583	3.45858
2001	5	8	128	3.56596	3.13285	2.64327	3.16556	3.21507	1.24592	2.94398	3.12919
2001	5	9	129	1.66792	1.46901	1.23823	1.48506	1.50858	0.584925	1.35563	1.48225
2001	5	10	130	1.85234	1.64351	1.38714	1.6623	1.7012	0.727789	1.64056	1.64694
2001	5	11	131	2.05136	1.77738	1.50252	1.7884	1.80609	0.637325	1.63505	1.72929
2001	5	12	132	3.65782	3.30512	2.77912	3.3436	3.44653	1.58545	3.26721	3.45858
2001	5	13	133	1.67451	1.52234	1.27545	1.54333	1.5861	0.711806	1.44273	1.64694
2001	5	14	134	3.28143	2.97294	2.49063	3.01579	3.0908	1.34604	2.77342	3.21154
2001	5	15	135	4.1706	3.67563	3.09864	3.7163	3.77755	1.47909	3.43486	3.70562
2001	5	16	136	3.56468	3.16704	2.66965	3.20478	3.27562	1.37874	3.07414	3.21154
2001	5	17	137	1.77819	1.65728	1.38911	1.66078	1.74545	0.948751	1.74503	1.6946
2001	5	18	138	3.88385	3.67906	3.07798	3.65684	3.87849	2.27202	3.9795	3.85135
2001	5	19	139	3.8051	3.63531	3.03843	3.59489	3.82946	2.3299	3.98562	3.85135
2001	5	20	140	4.13284	3.93591	3.29004	3.90242	4.14744	2.4783	4.28314	4.15946
2001	5	21	141	4.63362	4.39987	3.68001	4.36722	4.63781	2.74627	4.80618	4.62163
2001	5	22	142	5.9636	5.752	4.80364	5.64761	6.04691	3.85028	6.45457	6.16217
2001	5	23	143	6.56722	6.27532	5.2475	6.19621	6.61088	4.05733	6.99188	6.62433
2001	5	24	144	5.29338	5.10609	4.25649	5.03986	5.3682	3.32498	5.58296	5.54595
2001	5	25	145	8.60807	8.94316	7.38097	8.33099	8.80358	7.37919	10.5091	9.64699
2001	5	26	146	9.1884	8.763	7.3275	8.66923	9.23371	5.59681	9.66565	9.24325
2001	5	27	147	8.28929	7.86717	6.58205	7.8061	8.29366	4.91971	8.64627	8.2419
2001	5	28	148	5.57525	5.28388	4.41926	5.25377	5.56963	3.25677	5.76043	5.54595
2001	5	29	149	7.97265	7.47266	6.25168	7.48874	7.86886	4.30098	7.83034	7.77974
2001	5	30	150	3.3742	3.08223	2.58711	3.11405	3.22651	1.55951	3.12798	3.08108
2001	5	31	151	3.37636	3.09049	2.59526	3.11787	3.23997	1.60425	3.1872	3.08108
2001	6	1	152	3.55348	3.46797	2.89239	3.37504	3.62946	2.43123	3.97052	3.37645
2001	6	2	153	6.22178	6.13414	5.10897	5.92543	6.38407	4.44991	7.10208	6.06382
2001	6	3	154	5.73538	5.31211	4.4547	5.33919	5.58718	2.93477	5.58817	5.3919
2001	6	4	155	6.89672	6.26098	5.26285	6.3279	6.54384	3.10265	6.37286	6.16217
2001	6	5	156	6.13448	5.56913	4.67467	5.63729	5.81091	2.67896	5.53643	5.92899
2001	6	6	157	4.03911	3.72115	3.11177	3.76633	3.89507	1.86837	3.64442	3.85135
2001	6	7	158	3.62324	3.40715	2.85148	3.40376	3.59057	2.01792	3.62737	3.54325
2001	6	8	159	6.71385	6.14996	5.16157	6.20744	6.44572	3.1753	6.27562	6.16217
2001	6	9	160	5.86556	5.44092	4.56081	5.46796	5.72329	3.0156	5.69147	5.54595
2001	6	10	161	4.65846	4.4066	3.68542	4.38879	4.64457	2.68168	4.76875	4.62163
2001	6	11	162	7.5634	7.23872	6.04746	7.15516	7.6229	4.6556	8.0114	7.70271
2001	6	12	163	6.23917	6.05252	5.05006	5.92256	6.35119	4.12952	6.86532	6.5473
2001	6	13	164	7.85085	7.56262	6.31664	7.43208	7.95318	5.03613	8.53446	8.08785
2001	6	14	165	6.83205	6.38189	5.34782	6.38893	6.7235	3.69374	6.87061	6.5473
2001	6	15	166	7.55183	6.93755	5.81779	7.00202	7.27421	3.60425	7.11888	7.00947
2001	6	16	167	7.52066	6.82984	5.73538	6.90964	7.13143	3.32534	6.881	6.77838
2001	6	17	168	3.89884	3.83698	3.1878	3.74636	4.00614	2.66003	4.26998	3.8588
2001	6	18	169	7.22457	6.65057	5.5798	6.70109	6.9827	3.54313	6.90684	6.70136
2001	6	19	170	6.85785	6.22996	5.23389	6.29915	6.50962	3.06946	6.33039	6.16217
2001	6	20	171	6.93128	6.27547	5.27549	6.34687	6.54974	3.04636	6.35353	6.58777
2001	6	21	172	5.99386	5.50796	4.62101	5.55473	5.77867	2.89349	5.69046	5.54595
2001	6	22	173	7.238	6.70657	5.61142	6.76544	7.04023	3.5606	6.77406	6.93244
2001	6	23	174	7.09634	6.45321	5.42079	6.52372	6.74565	3.19829	6.52045	6.39325
2001	6	24	175	8.29502	7.48775	6.29685	7.57578	7.80457	3.57042	7.52546	7.82297
2001	6	25	176	6.81897	6.19894	5.20494	6.27039	6.47539	3.03627	6.23283	6.16217
2001	6	26	177	7.27483	6.57767	5.52785	6.6567	6.85711	3.13605	6.60697	6.91716
2001	6	27	178	8.11753	7.30363	6.14584	7.39032	7.60316	3.43111	7.36055	7.57593
2001	6	28	179	8.8909	7.97622	6.71416	8.07245	8.29132	3.67986	7.99237	8.23471
2001	6	29	180	4.61149	4.25597	3.56881	4.28652	4.47055	2.28754	4.4458	4.31352
2001	6	30	181	6.08991	5.84312	4.88013	5.76629	6.15048	3.79782	6.51385	6.23919
2001	7	1	182	6.78297	6.17894	5.18686	6.24799	6.45977	3.06273	6.26602	6.16217
2001	7	2	183	6.64765	5.97876	5.02541	6.05528	6.21332	2.73043	5.91567	6.25838
2001	7	3	184	8.83691	7.91679	6.65759	8.0185	8.21085	3.52652	7.77485	8.23471
2001	7	4	185	6.96952	6.33802	5.32023	6.41242	6.61974	3.09517	6.37852	6.31622
2001	7	5	186	6.90753	6.24343	5.24471	6.3214	6.50382	2.94029	6.21266	6.58777
2001	7	6	187	6.85065	6.20241	5.20672	6.28163	6.46214	2.92033	6.17565	6.58777
2001	7	7	188	6.94209	6.25792	5.25735	6.33851	6.50877	2.88401	6.20498	6.58777
2001	7	8	189	6.01988	5.48381	4.60334	5.54509	5.73305	2.71817	5.58674	5.46892
2001	7	9	190	9.05829	8.35995	7.01016	8.41995	8.78144	4.49338	8.74943	8.47298
2001	7	10	191	7.36296	6.66183	5.59943	6.73982	6.94895	3.20507	6.75668	6.9995
2001	7	11	192	6.26797	5.65601	4.75443	5.72509	5.8909	2.66423	5.68476	5.92899
2001	7	12	193	6.94641	6.27445	5.27366	6.3505	6.53804	2.97348	6.31201	6.58777
2001	7	13	194	5.18281	4.69084	3.94168	4.74665	4.89231	2.24996	4.73467	4.94083
2001	7	14	195	7.97509	7.14256	6.00811	7.23333	7.40902	3.19254	7.08587	7.41124
2001	7	15	196	6.39757	5.72801	4.81952	5.80001	5.94262	2.56897	5.69564	5.92899
2001	7	16	197	5.62622	5.02776	4.23132	5.09086	5.21073	2.22701	4.98369	5.18787
2001	7	17	198	5.31888	4.76997	4.01356	4.82912	4.95446	2.1731	4.78069	4.94083
2001	7	18	199	8.67941	7.82929	6.57849	7.9283	8.14822	3.64229	7.8509	8.23471
2001	7	19	200	6.25177	5.64701	4.74629	5.71545	5.88424	2.67613	5.70855	5.92899
2001	7	20	201	5.98461	5.38983	4.53489	5.45334	5.61352	2.54729	5.47581	5.5996
2001	7	21	202	6.92697	6.25894	5.25918	6.33595	6.52093	2.95689	6.31814	6.58777
2001	7	22	203	7.92335	7.14054	6.00886	7.22268	7.44144	3.40575	7.28669	7.41124
2001	7	23	204	7.62758	6.91514	5.815	6.98887	7.22555	3.41662	7.12582	6.77838
2001	7	24	205	7.83819	7.0824	5.95527	7.16486	7.38541	3.39739	7.2062	7.41124
2001	7	25	206	7.71346	7.00251	5.88202	7.08288	7.31276	3.41959	7.11955	6.93244
2001	7	26	207	7.62125	6.8909	5.79108	6.97369	7.18364	3.28538	6.97437	7.24654
2001	7	27	208	5.23896	4.7291	3.97696	4.7847	4.9292	2.25501	4.81537	4.94083
2001	7	28	209	7.83453	6.99968	5.89638	7.08397	7.26268	3.16197	7.05195	7.1642
2001	7	29	210	7.04072	6.34098	5.33517	6.4157	6.60414	2.99681	6.45644	6.58777
2001	7	30	211	5.46846	4.8566	4.09222	4.91511	5.01875	2.08632	4.80846	4.94083
2001	7	31	212	5.45545	4.90999	4.13054	4.96908	5.1106	2.29941	4.97751	5.10552
2001	8	1	213	7.79122	7.03511	5.91047	7.12356	7.32512	3.29295	7.05946	7.41124
2001	8	2	214	5.57268	5.03197	4.23051	5.09204	5.24412	2.39206	5.10127	5.27021
2001	8	3	215	6.98672	6.31098	5.30805	6.38328	6.58192	3.0365	6.44213	6.58777
2001	8	4	216	7.25217	6.51436	5.48151	6.59361	6.77401	3.01403	6.57884	6.75246
2001	8	5	217	8.81621	7.91118	6.65308	8.01162	8.21465	3.58034	7.91283	8.23471
2001	8	6	218	6.41377	5.73701	4.82765	5.8091	5.94889	2.55706	5.73195	5.92899
2001	8	7	219	5.7789	5.21481	4.3866	5.27518	5.43624	2.4942	5.32971	5.43491
2001	8	8	220	7.30952	6.51591	5.48788	6.59577	6.74805	2.87011	6.51335	6.67011
2001	8	9	221	7.02272	6.33098	5.32613	6.40496	6.59678	3.01004	6.46026	6.58777
2001	8	10	222	4.85492	4.4044	3.70426	4.44966	4.60465	2.19509	4.57563	4.31352
2001	8	11	223	7.95969	7.1499	6.01629	7.23689	7.43488	3.30809	7.23858	7.41124
2001	8	12	224	7.95969	7.1499	6.01629	7.23689	7.43488	3.30809	7.2175	7.41124
2001	8	13	225	7.6748	6.9007	5.80591	6.98424	7.17922	3.21221	6.9876	7.1642
2001	8	14	226	7.73694	7.02615	5.90442	7.10271	7.34257	3.47181	7.20946	6.93244
2001	8	15	227	7.4058	6.70064	5.63597	6.77429	6.99546	3.27203	6.88416	6.9995
2001	8	16	228	7.79931	7.0661	5.94104	7.14404	7.37914	3.46071	7.25185	7.41124
2001	8	17	229	5.84202	5.2946	4.44725	5.35796	5.52364	2.54709	5.3756	5.5996
2001	8	18	230	6.57689	5.9996	5.03426	6.06683	6.2739	2.98288	6.08701	6.00811
2001	8	19	231	5.42866	4.89876	4.12074	4.95547	5.10677	2.34303	4.95527	5.10552
2001	8	20	232	4.4693	4.05597	3.40791	4.1017	4.23627	1.98655	4.12877	4.00541
2001	8	21	233	4.33295	3.92561	3.30058	3.96891	4.09952	1.92262	4.01188	4.11735
2001	8	22	234	4.49848	4.1118	3.4543	4.14837	4.30973	2.12786	4.2799	4.08244
2001	8	23	235	5.18604	4.70323	3.95391	4.75434	4.91368	2.31707	4.82202	4.62163
2001	8	24	236	6.30837	5.71724	4.80564	5.78144	5.96969	2.79188	5.84701	6.01134
2001	8	25	237	6.07262	5.4691	4.60158	5.53354	5.69607	2.58475	5.56088	5.68195
2001	8	26	238	6.37407	5.75374	4.83863	5.82139	5.99719	2.74359	5.85484	6.01134
2001	8	27	239	6.66416	6.13649	5.15076	6.17778	6.4465	3.30447	6.4869	6.16217
2001	8	28	240	7.02128	6.32547	5.32069	6.40108	6.58702	2.98021	6.39525	6.58777
2001	8	29	241	7.23854	6.56246	5.51457	6.63746	6.85126	3.19515	6.68055	6.91716
2001	8	30	242	6.04409	5.463	4.58912	5.53122	5.69084	2.57276	5.47729	5.7643
2001	8	31	243	6.71241	6.14445	5.15614	6.20496	6.43681	3.14548	6.33782	6.16217
2001	9	1	244	6.67586	6.09132	5.12073	6.14428	6.38393	3.15102	6.37996	6.00811
2001	9	2	245	5.44998	4.98641	4.19151	5.02435	5.23211	2.63048	5.26186	4.92973
2001	9	3	246	6.37538	5.75877	4.84359	5.82475	6.006	2.77081	5.86617	6.01134
2001	9	4	247	6.93416	6.28649	5.28636	6.35352	6.56868	3.10602	6.46273	6.16217
2001	9	5	248	6.69441	6.13445	5.1471	6.19328	6.42861	3.15871	6.32074	6.16217
2001	9	6	249	5.07481	4.63084	3.88744	4.67968	4.84578	2.32934	4.73598	4.62163
2001	9	7	250	5.31781	4.76584	4.00948	4.82572	4.94692	2.15073	4.69268	4.94083
2001	9	8	251	3.84499	3.48943	2.92981	3.53142	3.64144	1.68368	3.48639	3.70562
2001	9	9	252	5.44038	4.89797	4.11932	4.95774	5.09734	2.28655	4.8763	5.10552
2001	9	10	253	4.85391	4.40054	3.70045	4.44746	4.59808	2.17421	4.49837	4.31352
2001	9	11	254	4.301	3.91375	3.29042	3.95152	4.09659	1.98471	4.04108	3.85135
2001	9	12	255	5.13312	4.67737	3.93087	4.72248	4.89711	2.37913	4.82373	4.62163
2001	9	13	256	5.22762	4.72987	3.97833	4.78185	4.93797	2.30967	4.82474	4.94083
2001	9	14	257	5.73638	5.16465	4.34658	5.22462	5.37976	2.44839	5.22734	5.35256
2001	9	15	258	4.7637	4.34383	3.64855	4.38767	4.54668	2.19728	4.45692	4.31352
2001	9	16	259	5.91115	5.418	4.55122	5.46021	5.68538	2.85963	5.66124	5.3919
2001	9	17	260	5.73439	5.23229	4.39858	5.27778	5.48363	2.70665	5.46269	5.16082
2001	9	18	261	5.56288	5.0416	4.24067	5.09434	5.26863	2.49809	5.17792	4.92973
2001	9	19	262	4.31135	3.91656	3.29268	3.95686	4.09573	1.9578	4.02682	3.85135
2001	9	20	263	4.0302	3.64407	3.0667	3.68272	3.80546	1.78983	3.7508	3.78797
2001	9	21	264	4.90633	4.43626	3.73337	4.48331	4.63273	2.17892	4.56146	4.61144
2001	9	22	265	5.08236	4.65976	3.91598	4.69228	4.89256	2.48592	4.91963	4.62163
2001	9	23	266	3.46996	3.15426	2.65405	3.18266	3.30294	1.61266	3.30384	3.08108
2001	9	24	267	4.16136	3.7752	3.17508	3.81399	3.94684	1.8815	3.89539	3.6973
2001	9	25	268	6.11716	5.53657	4.65881	5.59437	5.78425	2.73523	5.71309	5.7643
2001	9	26	269	3.53152	3.18375	2.68026	3.21891	3.32036	1.53653	3.26488	3.29388
2001	9	27	270	3.55708	3.19324	2.68838	3.2311	3.32151	1.48686	3.2208	3.29388
2001	9	28	271	4.09397	3.72928	3.13275	3.76774	3.90193	1.87545	3.8097	3.6973
2001	9	29	272	5.51612	5.08735	4.26527	5.127	5.34162	2.7119	5.23695	5.16082
2001	9	30	273	4.34891	4.11669	3.44353	4.09597	4.33946	2.52378	4.46844	4.31352
2001	10	1	274	5.50515	5.34046	4.45594	5.22579	5.60399	3.64369	5.99702	5.77703
2001	10	2	275	4.77078	4.48313	3.75596	4.47026	4.72708	2.69178	4.86383	4.62163
2001	10	3	276	3.8303	3.65814	3.05992	3.61074	3.85423	2.36929	4.09282	3.85135
2001	10	4	277	6.11286	5.77395	4.83338	5.74481	6.088	3.53473	6.30169	6.00811
2001	10	5	278	3.91304	3.56815	2.99702	3.60416	3.73477	1.80491	3.6396	3.54325
2001	10	6	279	4.00498	3.67137	3.07957	3.70748	3.8469	1.88527	3.72508	3.6973
2001	10	7	280	3.47608	3.14824	2.6477	3.18235	3.28817	1.54639	3.21073	3.29388
2001	10	8	281	4.68978	4.43813	3.71528	4.40833	4.67986	2.75131	4.89157	4.62163
2001	10	9	282	5.44521	5.4169	4.49616	5.23885	5.61775	3.92247	6.17303	5.51257
2001	10	10	283	6.12467	5.57129	4.68525	5.62385	5.83235	2.83301	5.78421	5.46892
2001	10	11	284	3.49624	3.16651	2.66489	3.19837	3.31001	1.5779	3.27332	3.08108
2001	10	12	285	2.76877	2.51941	2.11963	2.54148	2.63917	1.29542	2.63597	2.46487
2001	10	13	286	2.98468	2.88702	2.41269	2.81976	3.03158	1.98479	3.31949	3.08108
2001	10	14	287	5.28378	4.76813	4.0136	4.82014	4.97494	2.31471	4.87353	4.94083
2001	10	15	288	2.86153	2.59772	2.18511	2.62336	2.7173	1.30584	2.67698	2.54189
2001	10	16	289	3.43936	3.12549	2.6269	3.15831	3.26803	1.55794	3.17906	3.08108
2001	10	17	290	4.41547	4.04138	3.39619	4.0731	4.23996	2.12648	4.21006	4.00541
2001	10	18	291	3.98898	3.86235	3.22415	3.78165	4.0554	2.62573	4.32893	4.15946
2001	10	19	292	2.87092	2.80498	2.33671	2.73689	2.93569	1.94487	3.1111	2.75628
2001	10	20	293	4.98918	4.73041	3.96009	4.69048	4.98807	2.96918	5.19905	4.92973
2001	10	21	294	3.0898	2.936	2.45606	2.91111	3.09489	1.84576	3.2073	3.08108
2001	10	22	295	3.34232	3.10677	2.60549	3.11537	3.27128	1.76307	3.28992	3.15811
2001	10	23	296	2.45019	2.26874	1.90169	2.28249	2.38503	1.24035	2.33737	2.31081
2001	10	24	297	3.34786	3.09778	2.59619	3.11862	3.25532	1.67986	3.17342	3.15811
2001	10	25	298	3.35853	3.27379	2.72435	3.2134	3.43141	2.20538	3.51741	3.62027
2001	10	26	299	4.41554	4.53765	3.75061	4.26902	4.54761	3.63465	5.10404	4.8235
2001	10	27	300	3.50827	3.36252	2.80509	3.33237	3.53937	2.13161	3.57322	3.62027
2001	10	28	301	4.40811	3.95559	3.32654	4.00581	4.10732	1.79017	3.76487	4.11735
2001	10	29	302	1.11849	1.01847	0.856393	1.02784	1.0666	0.520871	1.0362	1.00135
2001	10	30	303	1.3841	1.2586	1.05873	1.2702	1.31775	0.641744	1.2875	1.23243
2001	10	31	304	1.55048	1.47463	1.23437	1.45844	1.55465	0.94194	1.62785	1.54054
2002	4	1	91	2.82204	2.51944	2.1089	2.55493	2.58929	0.965422	2.04671	2.08517
2002	4	2	92	1.17536	1.0447	0.87959	1.05759	1.07905	0.443945	0.962087	1.07051
2002	4	3	93	1.75604	1.58412	1.33289	1.60218	1.65162	0.759966	1.56367	1.64694
2002	4	4	94	1.43968	1.28289	1.08004	1.29885	1.32746	0.557652	1.20812	1.31755
2002	4	5	95	1.55484	1.40725	1.18251	1.42399	1.46769	0.674987	1.36986	1.48225
2002	4	6	96	2.22843	1.95838	1.65043	1.97863	2.00676	0.758036	1.78661	1.97633
2002	4	7	97	1.56391	1.41547	1.19024	1.4313	1.47754	0.689166	1.40168	1.48225
2002	4	8	98	2.38645	2.13939	1.79938	2.16658	2.22034	0.962228	2.02972	2.22337
2002	4	9	99	2.92274	2.70852	2.269	2.72648	2.84663	1.47349	2.70573	2.77298
2002	4	10	100	1.82105	1.74195	1.45573	1.72122	1.83463	1.12232	1.88085	1.84865
2002	4	11	101	3.6174	3.43421	2.87098	3.41348	3.61929	2.12397	3.64587	3.62027
2002	4	12	102	1.82059	1.65165	1.3891	1.66862	1.72674	0.823158	1.66917	1.61757
2002	4	13	103	4.96721	4.43954	3.74129	4.49173	4.61009	2.03086	4.39815	4.52909
2002	4	14	104	1.4237	1.2806	1.07861	1.29483	1.33452	0.612638	1.29825	1.31755
2002	4	15	105	2.65797	2.41624	2.03024	2.44213	2.52609	1.20097	2.42508	2.38784
2002	4	16	106	1.52706	1.36563	1.15025	1.38205	1.41766	0.620668	1.34367	1.3999
2002	4	17	107	1.16472	1.0681	0.895676	1.07887	1.11902	0.546966	1.05692	1.07838
2002	4	18	108	2.05278	1.83078	1.54008	1.85417	1.89347	0.787311	1.7175	1.89398
2002	4	19	109	2.69477	2.37436	2.00215	2.40053	2.44062	0.959207	2.2115	2.38807
2002	4	20	110	1.04196	0.941168	0.791049	0.952575	0.980706	0.446022	0.907327	0.988165
2002	4	21	111	0.8827	0.79525	0.669385	0.804265	0.828876	0.380404	0.788765	0.823471
2002	4	22	112	1.40762	1.23665	1.04339	1.24956	1.26911	0.491811	1.15854	1.23521
2002	4	23	113	1.41517	1.2435	1.04984	1.2566	1.27757	0.503627	1.18698	1.23521
2002	4	24	114	1.65269	1.46373	1.23377	1.48098	1.51007	0.616965	1.38406	1.48225
2002	4	25	115	1.49615	1.34746	1.13372	1.36334	1.40338	0.636822	1.32519	1.3999
2002	4	26	116	1.7546	1.57861	1.32745	1.59824	1.64184	0.73014	1.52063	1.64694
2002	4	27	117	2.02625	1.85595	1.55879	1.87142	1.94664	0.971496	1.88624	1.84865
2002	4	28	118	2.03079	1.85564	1.55824	1.8735	1.94375	0.949631	1.86172	1.84865
2002	4	29	119	4.21363	3.79859	3.19568	3.84298	3.95807	1.80602	3.74944	3.95266
2002	4	30	120	3.48508	3.15324	2.65222	3.1879	3.29198	1.53978	3.16037	3.29388
2002	5	1	121	3.85997	3.51365	2.95324	3.54833	3.67731	1.7769	3.55633	3.46622
2002	5	2	122	3.59308	3.21324	2.70646	3.25189	3.33568	1.4604	3.15586	3.29388
2002	5	3	123	2.93876	2.66517	2.24055	2.69412	2.78442	1.313	2.66354	2.61892
2002	5	4	124	4.19031	3.77998	3.1783	3.82548	3.93754	1.78611	3.71465	3.95266
2002	5	5	125	3.60906	3.27309	2.74969	3.31115	3.41665	1.58886	3.23419	3.45858
2002	5	6	126	3.81403	3.57659	2.99499	3.57592	3.76894	2.09974	3.79399	3.6973
2002	5	7	127	4.44971	4.17269	3.49415	4.17191	4.3971	2.44969	4.41155	4.31352
2002	5	8	128	5.02663	4.73238	3.96004	4.72492	4.98746	2.81813	5.02344	4.92973
2002	5	9	129	3.29909	3.1336	2.61886	3.11577	3.30207	1.93429	3.32551	3.31217
2002	5	10	130	4.21031	4.03969	3.37392	3.98657	4.25218	2.62566	4.40673	4.31352
2002	5	11	131	4.86823	4.64438	3.88049	4.60307	4.89273	2.93455	5.00439	4.92973
2002	5	12	132	6.842	6.22604	5.23082	6.29148	6.51174	3.11313	6.25808	6.16217
2002	5	13	133	2.72075	2.45112	2.06177	2.48042	2.55247	1.15483	2.42328	2.55276
2002	5	14	134	2.87331	2.56619	2.16082	2.59775	2.66041	1.14446	2.49619	2.63511
2002	5	15	135	2.96232	2.68026	2.25439	2.70971	2.79818	1.30881	2.68735	2.7998
2002	5	16	136	1.40405	1.29529	1.08646	1.30423	1.36077	0.697959	1.33106	1.30946
2002	5	17	137	2.96031	2.74636	2.30484	2.75364	2.89192	1.55704	2.93297	2.77298
2002	5	18	138	5.02125	4.46383	3.7548	4.52007	4.60495	1.85665	4.16072	4.61144
2002	5	19	139	1.50028	1.35075	1.1368	1.36644	1.40702	0.640348	1.34641	1.3999
2002	5	20	140	5.0157	4.48383	3.77511	4.53899	4.65087	2.01206	4.39298	4.61144
2002	5	21	141	4.54237	4.1237	3.46385	4.17103	4.3064	2.01376	4.1077	4.08244
2002	5	22	142	3.84741	3.49873	2.93898	3.53696	3.65728	1.73401	3.529	3.46622
2002	5	23	143	7.10553	6.35343	5.34415	6.4348	6.58258	2.79476	6.08327	6.58777
2002	5	24	144	3.44158	3.15468	2.64809	3.18252	3.30797	1.64263	3.21396	3.15811
2002	5	25	145	4.85657	4.45946	3.74347	4.49505	4.67985	2.35493	4.62144	4.46757
2002	5	26	146	4.31211	4.09954	3.42835	4.06621	4.32087	2.57244	4.49979	4.31352
2002	5	27	147	7.36701	6.76002	5.67377	6.81772	7.09087	3.54019	6.9307	6.77838
2002	5	28	148	5.46957	4.96715	4.17119	5.02519	5.18649	2.41843	4.93982	4.92973
2002	5	29	149	3.45664	3.13274	2.63323	3.16791	3.27106	1.5298	3.14944	3.29388
2002	5	30	150	4.00498	3.67137	3.07957	3.70748	3.8469	1.88527	3.70936	3.6973
2002	5	31	151	6.65697	6.10894	5.12358	6.16741	6.40323	3.15534	6.16071	6.16217
2002	6	1	152	5.07769	4.51497	3.80294	4.57012	4.66752	1.94487	4.37789	4.61144
2002	6	2	153	3.65666	3.39805	2.84848	3.411	3.57639	1.90897	3.57243	3.46622
2002	6	3	154	4.27331	4.07469	3.40556	4.03701	4.29312	2.57935	4.4429	4.31352
2002	6	4	155	7.07159	6.60108	5.53059	6.61373	6.95253	3.7913	6.95382	6.77838
2002	6	5	156	6.18826	5.61596	4.71864	5.67927	5.86561	2.75061	5.61839	5.54595
2002	6	6	157	4.70666	4.3391	3.63898	4.37175	4.55655	2.31896	4.46743	4.39054
2002	6	7	158	5.12973	4.79719	4.01936	4.79998	5.05466	2.79176	5.14799	4.92973
2002	6	8	159	5.50072	5.26367	4.40304	5.18511	5.5441	3.45052	5.95239	5.54595
2002	6	9	160	3.93941	3.83163	3.19607	3.74194	4.01659	2.64132	4.39207	3.72098
2002	6	10	161	6.38176	6.2282	5.1945	6.06129	6.51821	4.36629	7.19623	6.06382
2002	6	11	162	7.25694	6.66259	5.58219	6.73476	6.97735	3.38331	6.7478	6.77838
2002	6	12	163	5.30772	4.86593	4.07859	4.91859	5.09469	2.46328	4.86909	4.92973
2002	6	13	164	8.72987	8.00211	6.71711	8.07274	8.39094	4.16667	8.24482	8.01082
2002	6	14	165	5.24378	4.85678	4.07287	4.88154	5.10828	2.68322	5.12615	4.92973
2002	6	15	166	4.77529	4.34697	3.65107	4.39364	4.5458	2.16714	4.42591	4.31352
2002	6	16	167	7.52225	6.8359	5.74136	6.91325	7.14176	3.35815	6.92557	6.77838
2002	6	17	168	5.58247	5.02234	4.22035	5.08742	5.21858	2.28604	4.95464	5.27021
2002	6	18	169	4.04732	3.69206	3.09801	3.73344	3.86086	1.83562	3.74106	3.6973
2002	6	19	170	5.52801	5.68135	4.69315	5.35809	5.70466	4.51822	6.54735	6.06382
2002	6	20	171	5.44038	5.44412	4.51575	5.23881	5.62025	4.02509	6.15387	5.58147
2002	6	21	172	8.06308	7.98945	6.61388	7.83332	8.3279	5.45113	8.69964	5.96965
2002	6	22	173	5.47533	4.98919	4.19293	5.03731	5.22359	2.53773	5.14639	4.92973
2002	6	23	174	6.78441	6.18445	5.1923	6.25098	6.46899	3.09256	6.27766	6.16217
2002	6	24	175	7.13667	6.48539	5.45082	6.55349	6.78116	3.23273	6.642	6.39325
2002	6	25	176	7.03785	6.32996	5.32429	6.40762	6.58447	2.93716	6.34541	6.58777
2002	6	26	177	5.64583	5.07638	4.27102	5.13783	5.28127	2.363	5.10047	5.27021
2002	6	27	178	4.87811	4.41069	3.7093	4.46064	4.60209	2.13481	4.48937	4.61144
2002	6	28	179	5.57268	5.03197	4.23051	5.09204	5.24412	2.39206	5.07764	5.27021
2002	6	29	180	6.89241	6.24445	5.24654	6.31794	6.51552	3.01317	6.32934	6.58777
2002	6	30	181	5.68315	5.18409	4.3531	5.23759	5.42545	2.61499	5.31908	5.16082
2002	7	1	182	7.68381	6.93602	5.83287	7.01756	7.22949	3.30734	7.0315	7.24654
2002	7	2	183	5.83631	5.27707	4.43792	5.33684	5.50607	2.55415	5.37416	5.51726
2002	7	3	184	7.66559	6.93108	5.82891	7.00958	7.23186	3.3547	7.05003	7.24654
2002	7	4	185	4.8015	4.36483	3.66753	4.41159	4.56326	2.1695	4.47144	4.31352
2002	7	5	186	7.52383	6.84196	5.74734	6.91672	7.15202	3.39096	6.99603	6.77838
2002	7	6	187	6.02371	5.49848	4.61781	5.55272	5.75743	2.79758	5.68101	5.46892
2002	7	7	188	7.60461	6.89202	5.7931	6.96941	7.19634	3.36555	7.03721	7.24654
2002	7	8	189	5.46842	4.96275	4.16684	5.02247	5.17894	2.39457	5.01167	5.27021
2002	7	9	190	6.81897	6.19894	5.20494	6.27039	6.47539	3.03627	6.29491	6.16217
2002	7	10	191	6.07098	5.53809	4.64701	5.60016	5.79129	2.75343	5.63465	5.54595
2002	7	11	192	4.83728	4.37812	3.67891	4.43021	4.56615	2.09996	4.41221	4.61144
2002	7	12	193	4.7384	4.26597	3.5878	4.31803	4.43962	1.99151	4.28867	4.44674
2002	7	13	194	5.03927	4.56096	3.83523	4.61197	4.76097	2.22065	4.6578	4.77613
2002	7	14	195	3.96122	3.5699	3.00409	3.61099	3.72032	1.70248	3.63423	3.70562
2002	7	15	196	7.14442	6.46415	5.43705	6.53519	6.74856	3.15654	6.63377	6.75246
2002	7	16	197	4.37705	3.94717	3.31978	3.99399	4.11229	1.8709	4.01193	4.11735
2002	7	17	198	7.52541	6.84802	5.75332	6.92005	7.16222	3.42377	7.05711	6.77838
2002	7	18	199	6.81051	6.18272	5.19706	6.2488	6.46204	3.06387	6.37257	6.08514
2002	7	19	200	7.03785	6.32996	5.32429	6.40762	6.58447	2.93716	6.37347	6.58777
2002	7	20	201	5.40103	4.94038	4.14807	4.98666	5.17683	2.54293	5.13245	4.92973
2002	7	21	202	6.95216	6.29649	5.2954	6.36469	6.57635	3.09279	6.46522	6.58777
2002	7	22	203	7.57849	6.85232	5.76267	6.92992	7.14967	3.31658	6.99119	7.1642
2002	7	23	204	6.31657	5.68301	4.77884	5.75365	5.91062	2.62851	5.70855	5.92899
2002	7	24	205	2.95661	2.83845	2.3656	2.81614	2.98656	1.78924	3.10651	3.08108
2002	7	25	206	9.54729	9.25916	7.71783	9.09148	9.71948	6.21229	10.3891	10.0905
2002	7	26	207	7.40345	6.7699	5.6817	6.83823	7.08944	3.44547	6.95567	6.77838
2002	7	27	208	6.76928	6.18547	5.19413	6.24499	6.47917	3.16544	6.39599	6.16217
2002	7	28	209	5.53178	5.01678	4.21751	5.07129	5.24125	2.47154	5.14944	4.92973
2002	7	29	210	5.43443	4.97401	4.17993	5.01305	5.21842	2.61721	5.24867	4.92973
2002	7	30	211	6.43355	5.88666	4.94475	5.93741	6.1722	3.06383	6.1724	5.85406
2002	7	31	212	6.5936	6.102	5.12004	6.12967	6.41957	3.38722	6.53411	6.16217
2002	8	1	213	6.18956	5.62092	4.72353	5.68217	5.87406	2.77745	5.7878	5.54595
2002	8	2	214	5.9349	5.4413	4.55747	5.50539	5.69264	2.71447	5.51766	5.54595
2002	8	3	215	6.46365	5.88996	4.94644	5.95201	6.1618	2.95369	6.03897	5.85406
2002	8	4	216	5.31584	4.8129	4.04878	4.86408	5.02751	2.3709	4.96189	5.02317
2002	8	5	217	4.90129	4.41697	3.71435	4.47053	4.59894	2.07453	4.46415	4.61144
2002	8	6	218	5.34272	4.87026	4.08894	4.92265	5.09433	2.43539	4.99825	4.85271
2002	8	7	219	5.68556	5.19332	4.36221	5.24208	5.44064	2.66495	5.37474	5.16082
2002	8	8	220	5.50817	4.97352	4.17549	5.03904	5.17379	2.29124	4.94461	5.27021
2002	8	9	221	6.01259	5.4455	4.5733	5.5124	5.67775	2.59591	5.47218	5.7643
2002	8	10	222	5.51738	5.00878	4.21028	5.06232	5.23507	2.48212	5.15264	4.92973
2002	8	11	223	6.25565	5.66188	4.76097	5.7252	5.91017	2.75666	5.80089	5.92899
2002	8	12	224	6.51872	6.05098	5.07301	6.07671	6.36722	3.38049	6.46777	6.16217
2002	8	13	225	6.85928	6.23547	5.23933	6.30227	6.51895	3.09929	6.41838	6.16217
2002	8	14	226	5.34888	4.82158	4.0478	4.88631	5.01013	2.18627	4.78266	5.10552
2002	8	15	227	5.98921	5.47095	4.59212	5.52745	5.72705	2.76813	5.61729	5.46892
2002	8	16	228	7.07097	6.33894	5.3315	6.4195	6.57878	2.85105	6.25642	6.58777
2002	8	17	229	2.57736	2.33585	1.96202	2.36381	2.4369	1.12372	2.33806	2.47041
2002	8	18	230	6.1957	5.46884	4.61052	5.53086	5.62807	2.23826	5.29385	5.51726
2002	8	19	231	4.22702	3.81451	3.21088	3.85611	3.97996	1.85177	3.90729	3.95266
2002	8	20	232	3.69638	3.32901	2.80096	3.36824	3.46717	1.57332	3.36215	3.45858
2002	8	21	233	5.92219	5.35115	4.49953	5.41345	5.58009	2.56692	5.41859	5.5996
2002	8	22	234	5.56058	5.03278	4.23197	5.08907	5.25348	2.45037	5.13127	5.27021
2002	8	23	235	5.60493	5.06119	4.25802	5.11824	5.27923	2.44248	5.16968	5.27021
2002	8	24	236	5.94139	5.43068	4.56229	5.47898	5.6921	2.81038	5.66351	5.3919
2002	8	25	237	5.69391	5.22833	4.3889	5.27006	5.48672	2.76096	5.47014	5.23784
2002	8	26	238	4.66491	4.29554	3.60553	4.32444	4.51255	2.31313	4.52608	4.31352
2002	8	27	239	3.77256	3.5592	2.97981	3.54353	3.75279	2.16728	3.89055	3.6973
2002	8	28	240	6.71678	6.40914	5.35757	6.3428	6.75256	4.08607	7.08576	6.77838
2002	8	29	241	6.62097	6.08894	5.1055	6.14377	6.38652	3.1818	6.27172	6.16217
2002	8	30	242	5.41586	4.91831	4.13309	4.9719	5.1398	2.43027	5.01956	4.85271
2002	8	31	243	5.50183	4.99638	4.1987	5.05082	5.22138	2.46884	5.09488	4.92973
2002	9	1	244	6.76928	6.18547	5.19413	6.24499	6.47917	3.16544	6.37481	6.16217
2002	9	2	245	4.5333	4.12802	3.46867	4.16968	4.31972	2.0818	4.25027	4.08244
2002	9	3	246	4.18037	3.77728	3.17614	3.82126	3.93889	1.81194	3.82535	3.95266
2002	9	4	247	5.60148	5.04797	4.24497	5.10918	5.25593	2.37089	5.06835	5.27021
2002	9	5	248	6.08314	5.50943	4.63348	5.56911	5.75431	2.70619	5.63061	5.7643
2002	9	6	249	4.20219	3.8226	3.21242	3.86198	3.99854	1.91658	3.92471	3.77433
2002	9	7	250	5.56058	5.03278	4.23197	5.08907	5.25348	2.45037	5.11629	5.27021
2002	9	8	251	4.96097	4.51746	3.7959	4.56304	4.72724	2.2782	4.63982	4.46757
2002	9	9	252	4.90006	4.4499	3.73946	4.49839	4.65029	2.19881	4.51821	4.39054
2002	9	10	253	5.57728	5.0496	4.2479	5.1033	5.27477	2.4875	5.17984	5.27021
2002	9	11	254	4.80544	4.45447	3.73332	4.47971	4.68396	2.44912	4.65601	4.5446
2002	9	12	255	4.2965	3.89653	3.27344	3.94185	4.06744	1.8915	3.89906	4.11735
2002	9	13	256	3.04683	2.78594	2.3398	2.81138	2.91966	1.43787	2.85973	2.77298
2002	9	14	257	3.90127	3.53925	2.97664	3.57562	3.70016	1.76391	3.63971	3.46622
2002	9	15	258	4.00757	3.68128	3.08936	3.7116	3.86271	1.93895	3.82069	3.6973
2002	9	16	259	4.79293	4.37326	3.67642	4.41128	4.58333	2.26227	4.57012	4.31352
2002	9	17	260	4.77932	4.41995	3.70809	4.44304	4.64828	2.43411	4.67016	4.46757
2002	9	18	261	4.67348	4.28712	3.59664	4.32708	4.49424	2.22036	4.41158	4.31352
2002	9	19	262	5.00437	4.95401	4.11982	4.78729	5.14746	3.593	5.65073	4.96131
2002	9	20	263	4.85843	4.65401	3.89065	4.58782	4.90071	3.04058	5.18945	4.92973
2002	9	21	264	5.37129	5.14438	4.29852	5.07907	5.41696	3.33194	5.71692	5.46892
2002	9	22	265	4.18511	4.02569	3.36126	3.96606	4.23516	2.64418	4.5081	4.31352
2002	9	23	266	4.75311	4.34454	3.64983	4.38318	4.55368	2.2483	4.50681	4.31352
2002	9	24	267	4.14149	3.76981	3.17075	3.80366	3.94849	1.93317	3.92967	3.6973
2002	9	25	268	4.50269	4.05929	3.41733	4.1041	4.23346	1.95907	4.15149	4.1997
2002	9	26	269	4.31342	3.86251	3.25428	3.90759	4.0149	1.78826	3.90887	3.95266
2002	9	27	270	3.5128	3.171	2.6685	3.20616	3.30807	1.53484	3.2368	3.29388
2002	9	28	271	3.89885	3.52995	2.96746	3.57012	3.68423	1.71358	3.5788	3.70562
2002	9	29	272	3.67138	3.35562	2.82103	3.38215	3.51976	1.76024	3.52741	3.31217
2002	9	30	273	4.58175	4.26583	3.58026	4.2663	4.49621	2.48235	4.65494	4.31352
2002	10	1	274	4.18555	3.79712	3.19571	3.83302	3.97297	1.91931	3.96763	3.6973
2002	10	2	275	3.45664	3.13274	2.63323	3.16791	3.27106	1.5298	3.17068	3.29388
2002	10	3	276	2.49834	2.35598	1.97061	2.35165	2.48279	1.40772	2.51354	2.46487
2002	10	4	277	3.64382	3.49051	2.91799	3.44087	3.67553	2.28043	3.88481	3.6973
2002	10	5	278	5.85324	5.4468	4.56735	5.45929	5.73628	3.10803	5.78646	5.54595
2002	10	6	279	2.91634	2.74817	2.30112	2.73781	2.8976	1.66449	2.98232	2.85
2002	10	7	280	3.15976	2.88994	2.42991	2.91124	3.03273	1.52842	3.04074	2.85
2002	10	8	281	3.40408	3.10824	2.61154	3.1367	3.2567	1.59931	3.19985	3.08108
2002	10	9	282	2.71059	2.48521	2.08852	2.50255	2.60937	1.32583	2.6125	2.46487
2002	10	10	283	5.30713	4.91082	4.12354	4.92687	5.16951	2.76019	5.26295	4.92973
2002	10	11	284	3.70949	3.52981	2.95379	3.49227	3.72089	2.2507	3.92827	3.6973
2002	10	12	285	3.51895	3.3348	2.79258	3.30552	3.51686	2.09704	3.71413	3.46622
2002	10	13	286	3.58982	3.46051	2.89087	3.39645	3.63841	2.32012	3.91694	3.6973
2002	10	14	287	4.85391	4.40054	3.70045	4.44746	4.59808	2.17421	4.49598	4.31352
2002	10	15	288	8.31754	7.53056	6.33059	7.61625	7.85969	3.65564	7.57945	7.90532
2002	10	16	289	2.78979	2.52921	2.1283	2.55416	2.64492	1.26761	2.60398	2.46487
2002	10	17	290	1.98024	1.83886	1.54416	1.84039	1.93776	1.0609	1.99857	1.84865
2002	10	18	291	2.5274	2.4121	2.0173	2.38359	2.54156	1.55143	2.68538	2.54189
2002	10	19	292	3.18124	2.99151	2.50669	2.98014	3.15482	1.80943	3.27611	3.08108
2002	10	20	293	2.78144	2.5208	2.12033	2.54717	2.63432	1.24904	2.57648	2.46487
2002	10	21	294	2.75501	2.71468	2.25257	2.65771	2.83448	1.86021	2.88139	2.75628
2002	10	22	295	4.75418	4.58478	3.82698	4.50898	4.82027	3.04309	5.03971	4.92973
2002	10	23	296	2.50179	2.36921	1.98366	2.35087	2.49843	1.4793	2.5978	2.46487
2002	10	24	297	3.07396	2.93426	2.45517	2.89522	3.09194	1.90373	3.28025	3.08108
2002	10	25	298	1.9156	1.83079	1.53166	1.80496	1.92877	1.19396	2.05271	1.92568
2002	10	26	299	2.70454	2.48561	2.08926	2.4991	2.61282	1.35498	2.64268	2.46487
2002	10	27	300	2.39775	2.21959	1.86323	2.22747	2.33623	1.24469	2.35871	2.23379
2002	10	28	301	2.60317	2.42741	2.03646	2.42714	2.55858	1.41714	2.62013	2.46487
2002	10	29	302	2.51985	2.3145	1.94374	2.33105	2.43027	1.23548	2.39227	2.31081
2002	10	30	303	2.95134	3.06623	2.53062	2.85634	3.01837	2.53001	3.49953	3.30754
2002	10	31	304	3.28446	3.19922	2.66951	3.11557	3.35078	2.23465	3.61673	3.10082
2003	4	1	91	2.46639	2.28657	1.91866	2.29432	2.40696	1.28635	2.38593	2.31081
2003	4	2	92	3.15261	2.91056	2.43513	2.94133	3.05091	1.50095	2.76355	3.00406
2003	4	3	93	3.22141	2.94419	2.46508	2.98307	3.07406	1.42027	2.77526	3.00406
2003	4	4	94	1.87332	1.76534	1.47633	1.76372	1.86003	1.04684	1.86132	1.84865
2003	4	5	95	2.17244	2.05063	1.71415	2.04822	2.16046	1.22014	2.16192	2.15676
2003	4	6	96	4.34439	4.05812	3.38517	4.09777	4.25979	2.1596	3.86603	4.31352
2003	4	7	97	3.3922	3.09223	2.59615	3.12549	3.23449	1.54628	3.03492	3.08108
2003	4	8	98	3.12436	2.95049	2.4687	2.93946	3.11021	1.78947	3.12681	3.08108
2003	4	9	99	3.98165	3.65275	3.0622	3.69049	3.82636	1.86535	3.55629	3.6973
2003	4	10	100	4.36587	4.00464	3.36209	4.03782	4.20118	2.10272	4.03026	4.00541
2003	4	11	101	3.18808	2.98824	2.50306	2.98674	3.14934	1.75808	3.15047	3.08108
2003	4	12	102	3.1708	2.981	2.49674	2.9734	3.14283	1.78622	3.19006	3.08108
2003	4	13	103	3.75281	3.41851	2.87169	3.45376	3.57677	1.71916	3.42702	3.38919
2003	4	14	104	3.75744	3.3374	2.81397	3.37684	3.45237	1.45795	3.25423	3.37623
2003	4	15	105	1.14067	1.00095	0.845572	1.01128	1.02812	0.405895	0.962759	0.988165
2003	4	16	106	1.35132	1.20891	1.01866	1.22308	1.25598	0.556352	1.20026	1.23521
2003	4	17	107	3.00822	2.70576	2.27744	2.73743	2.81713	1.27507	2.68631	2.7998
2003	4	18	108	2.26835	2.04212	1.71628	2.06817	2.12327	0.938396	1.9465	2.14102
2003	4	19	109	2.45614	2.24731	1.87993	2.27856	2.34541	1.07385	2.08629	2.31081
2003	4	20	110	3.56248	3.18447	2.67931	3.22485	3.29985	1.40568	3.0186	3.29388
2003	4	21	111	1.61025	1.43379	1.20609	1.45203	1.48102	0.606469	1.32076	1.48225
2003	4	22	112	2.09105	1.89195	1.59133	1.91274	1.97519	0.923866	1.88085	1.97633
2003	4	23	113	3.17837	2.86538	2.41223	2.89701	2.98832	1.38287	2.86916	2.9645
2003	4	24	114	1.26544	1.18138	0.987824	1.1882	1.24237	0.654837	1.18515	1.23243
2003	4	25	115	3.64822	3.19967	2.69782	3.23119	3.27528	1.227	2.92472	3.21154
2003	4	26	116	0.872981	0.787495	0.662147	0.796975	0.82032	0.372106	0.762172	0.823471
2003	4	27	117	0.600178	0.572139	0.477097	0.570298	0.60236	0.348251	0.574608	0.616217
2003	4	28	118	4.50011	4.20069	3.51946	4.20874	4.42434	2.41265	4.34095	4.31352
2003	4	29	119	4.3208	3.91592	3.29153	3.95989	4.08883	1.91225	3.86368	4.11735
2003	4	30	120	3.98118	3.65015	3.06752	3.67562	3.83251	1.94731	3.80311	3.62027
2003	5	1	121	3.64123	3.48059	2.9082	3.44312	3.66601	2.22675	3.78847	3.6973
2003	5	2	122	4.95447	4.92205	4.09052	4.74674	5.10288	3.60188	5.56976	4.96131
2003	5	3	123	5.58129	5.42213	4.52568	5.29121	5.68549	3.74894	6.16784	5.23694
2003	5	4	124	6.51435	6.33235	5.2837	6.18178	6.63897	4.37175	7.19176	6.13273
2003	5	5	125	4.82733	4.62919	3.86749	4.56666	4.87333	3.01403	5.14852	4.92973
2003	5	6	126	5.52794	5.26184	4.39974	5.21524	5.54531	3.31934	5.78968	5.54595
2003	5	7	127	4.89658	5.08385	4.19235	4.75831	5.03148	4.14043	5.85307	5.51257
2003	5	8	128	6.44606	6.46976	5.36169	6.22279	6.66783	4.79597	7.21337	6.68399
2003	5	9	129	3.31292	3.28406	2.72918	3.17608	3.41111	2.37542	3.71052	3.30754
2003	5	10	130	5.48985	5.46996	4.54685	5.25097	5.65353	4.07497	6.33711	5.51257
2003	5	11	131	6.19881	6.11102	5.08707	5.91464	6.36361	4.39884	7.02573	6.06382
2003	5	12	132	6.20245	6.03712	5.03663	5.88759	6.32592	4.18932	6.8993	5.8571
2003	5	13	133	5.33613	5.16376	4.31189	5.05397	5.4226	3.51591	5.8745	5.54595
2003	5	14	134	6.36897	5.94894	4.97894	5.97055	6.26155	3.36703	6.27736	6.16217
2003	5	15	135	6.05038	5.48711	4.6129	5.54672	5.73262	2.70324	5.56678	5.3919
2003	5	16	136	4.33929	3.9595	3.32625	3.99765	4.14653	2.02011	4.0543	3.92838
2003	5	17	137	4.84518	4.65041	3.88777	4.57485	4.89494	3.07502	5.23881	4.92973
2003	5	18	138	4.52562	4.33987	3.62577	4.28125	4.56874	2.82565	4.81815	4.62163
2003	5	19	139	6.60872	6.10098	5.11821	6.13924	6.41199	3.31434	6.38574	6.16217
2003	5	20	140	4.40308	4.0588	3.40639	4.08465	4.26507	2.19798	4.25648	4.08244
2003	5	21	141	5.64583	5.07638	4.27102	5.13783	5.28127	2.363	5.07242	5.27021
2003	5	22	142	5.68783	5.12237	4.30688	5.18573	5.33008	2.38371	5.08374	5.35256
2003	5	23	143	6.77099	6.24221	5.23502	6.28918	6.55504	3.33605	6.43815	6.31622
2003	5	24	144	6.68504	6.15751	5.17067	6.19346	6.47206	3.35089	6.48908	6.16217
2003	5	25	145	5.48768	5.08973	4.26128	5.1264	5.34789	2.75504	5.21144	5.23784
2003	5	26	146	5.85908	5.41613	4.53635	5.46094	5.68625	2.88138	5.45908	5.54595
2003	5	27	147	6.69728	6.14547	5.15797	6.19793	6.44624	3.21836	6.26931	6.16217
2003	5	28	148	5.94594	5.39059	4.52983	5.4522	5.62782	2.62459	5.38429	5.68195
2003	5	29	149	5.25786	4.75726	4.00412	4.806	4.97076	2.35693	4.88128	4.94083
2003	5	30	150	4.38607	3.90802	3.28012	3.96017	4.026	1.57475	3.54914	4.11735
2003	5	31	151	3.5882	3.17092	2.67227	3.20753	3.26459	1.30123	3.0089	3.21154
2003	6	1	152	1.22557	1.10521	0.929539	1.11832	1.15144	0.523853	1.09809	1.15286
2003	6	2	153	4.30003	3.84659	3.23907	3.89337	3.99255	1.74252	3.79598	3.95266
2003	6	3	154	3.83972	3.5024	2.94307	3.53534	3.66833	1.79179	3.58874	3.46622
2003	6	4	155	4.77932	4.3624	3.66629	4.40133	4.57135	2.25066	4.51109	4.31352
2003	6	5	156	4.83942	4.56045	3.81385	4.55627	4.80507	2.70434	4.87727	4.77568
2003	6	6	157	5.82261	5.90202	4.89814	5.56817	5.98454	4.67536	7.02156	6.06382
2003	6	7	158	6.42555	6.3135	5.26171	6.11053	6.58331	4.53994	7.31086	6.20164
2003	6	8	159	10.8872	9.69973	8.17362	9.81639	10.0485	4.3018	9.63012	9.88165
2003	6	9	160	11.2012	10.0647	8.46667	10.1887	10.4643	4.64173	9.98569	10.4581
2003	6	10	161	5.52062	4.92307	4.14803	4.98236	5.10275	2.19684	4.88466	5.02317
2003	6	11	162	5.18074	4.63272	3.89944	4.69033	4.80457	2.07189	4.5701	4.77613
2003	6	12	163	4.3676	3.94781	3.32093	3.99177	4.1197	1.91645	4.00338	4.11735
2003	6	13	164	4.85492	4.4044	3.70426	4.44966	4.60465	2.19509	4.53277	4.31352
2003	6	14	165	5.00012	4.53921	3.81556	4.58773	4.74429	2.24942	4.64713	4.46757
2003	6	15	166	5.64629	5.10694	4.29368	5.16575	5.32781	2.46442	5.17512	5.35256
2003	6	16	167	7.00328	6.31547	5.31165	6.39038	6.57967	2.99344	6.36624	6.58777
2003	6	17	168	7.35194	6.62546	5.57153	6.7058	6.89841	3.1118	6.64424	6.91716
2003	6	18	169	6.89385	6.24996	5.25197	6.32139	6.52501	3.043	6.34293	6.58777
2003	6	19	170	6.41277	5.80991	4.88486	5.87399	6.06729	2.84548	5.93238	6.09369
2003	6	20	171	7.13704	6.43592	5.4092	6.51618	6.69908	3.00369	6.42169	6.75246
2003	6	21	172	5.77441	5.16664	4.34654	5.23225	5.35662	2.29497	5.08959	5.35256
2003	6	22	173	5.74399	5.14591	4.32743	5.21203	5.33705	2.29224	5.05863	5.35256
2003	6	23	174	5.55971	5.06267	4.25403	5.11376	5.29776	2.55315	5.20625	5.00676
2003	6	24	175	6.66128	6.12547	5.13989	6.17399	6.42939	3.24482	6.384	6.16217
2003	6	25	176	5.24337	5.13417	4.27937	4.98776	5.36515	3.63104	5.90512	5.03022
2003	6	26	177	9.5778	8.71566	7.32241	8.80733	9.11555	4.35752	8.91713	8.62703
2003	6	27	178	5.67348	5.08797	4.28113	5.15106	5.28475	2.31797	5.07567	5.27021
2003	6	28	179	6.846	6.14169	5.1699	6.21579	6.38432	2.83349	6.18164	6.34073
2003	6	29	180	5.60263	5.05238	4.24932	5.1123	5.26374	2.39475	5.11202	5.27021
2003	6	30	181	6.96297	6.27894	5.27726	6.35725	6.53569	2.93043	6.28666	6.58777
2003	7	1	182	7.34231	6.64535	5.58405	6.72442	6.93077	3.18744	6.70651	6.9995
2003	7	2	183	7.56501	6.87002	5.77321	6.94488	7.1794	3.39466	7.02573	6.77838
2003	7	3	184	7.07297	6.48531	5.44627	6.53744	6.80449	3.41413	6.80003	6.47028
2003	7	4	185	8.30872	7.43473	6.25887	7.52616	7.71566	3.35684	7.43448	7.65828
2003	7	5	186	6.35026	5.70596	4.8	5.77628	5.93251	2.63153	5.76794	5.92899
2003	7	6	187	8.05933	7.19996	6.06102	7.28941	7.46315	3.20011	7.15323	7.41124
2003	7	7	188	4.44455	3.98467	3.35368	4.03349	4.13941	1.82129	3.99517	4.11735
2003	7	8	189	7.10759	6.39896	5.3817	6.47704	6.65943	2.98727	6.433	6.67011
2003	7	9	190	6.24918	5.63709	4.73651	5.70837	5.86672	2.62245	5.62941	5.92899
2003	7	10	191	5.47274	4.93055	4.15018	4.98645	5.13903	2.3585	5.03463	5.10552
2003	7	11	192	6.94928	6.28547	5.28453	6.35785	6.5573	3.03313	6.39747	6.58777
2003	7	12	193	6.96297	6.27894	5.27726	6.35725	6.53569	2.93043	6.28017	6.58777
2003	7	13	194	6.21419	5.60917	4.71045	5.68207	5.83592	2.59258	5.5757	5.92899
2003	7	14	195	7.79628	6.97778	5.86862	7.06732	7.23322	3.08879	6.8868	7.24654
2003	7	15	196	7.14441	6.38445	5.3731	6.46458	6.6168	2.82795	6.31201	6.58777
2003	7	16	197	6.33277	5.69201	4.78697	5.76305	5.91711	2.6166	5.70252	5.92899
2003	7	17	198	6.33277	5.69201	4.78697	5.76305	5.91711	2.6166	5.69487	5.92899
2003	7	18	199	6.46298	5.85934	4.92373	5.9263	6.1172	2.85281	5.95951	6.17603
2003	7	19	200	7.73371	7.01376	5.89219	7.09533	7.32139	3.4047	7.12815	7.41124
2003	7	20	201	6.04505	5.54488	4.6552	5.59083	5.81702	2.91146	5.79372	5.54595
2003	7	21	202	7.0436	6.352	5.34604	6.42326	6.6236	3.05646	6.50794	6.58777
2003	7	22	203	6.34312	5.73167	4.82611	5.79029	5.98717	2.83134	5.95015	5.92899
2003	7	23	204	6.54299	5.96984	5.0221	6.01597	6.26128	3.13009	6.31605	5.85406
2003	7	24	205	7.30047	6.7645	5.68182	6.77665	7.1256	3.86087	7.35405	6.77838
2003	7	25	206	6.69962	6.0658	5.10972	6.12077	6.3467	3.07364	6.38777	5.85406
2003	7	26	207	6.42208	5.84558	4.92005	5.89269	6.12733	3.0386	6.1849	5.70001
2003	7	27	208	6.98167	6.35057	5.34793	6.39895	6.65837	3.31816	6.76214	6.16217
2003	7	28	209	6.36062	5.74563	4.83914	5.8033	6.00257	2.84628	5.98414	5.92899
2003	7	29	210	5.54098	5.05204	4.2523	5.08877	5.30003	2.66242	5.37894	4.92973
2003	7	30	211	7.51212	6.79475	5.72442	6.85775	7.10649	3.42357	7.14105	6.5473
2003	7	31	212	6.79104	6.05927	5.11407	6.12572	6.29763	2.82454	6.25443	6.09369
2003	8	1	213	8.35115	7.45127	6.28893	7.53297	7.74439	3.47342	7.69152	7.49359
2003	8	2	214	7.64752	6.87498	5.79743	6.94471	7.17272	3.35686	7.18509	6.9995
2003	8	3	215	5.90098	5.25204	4.4331	5.31096	5.44953	2.39781	5.37999	5.27021
2003	8	4	216	7.45167	6.64257	5.60699	6.71578	6.90041	3.07833	6.84682	6.67011
2003	8	5	217	5.84454	5.22445	4.40852	5.28099	5.43534	2.46401	5.40989	5.27021
2003	8	6	218	5.95197	5.3493	4.51188	5.40278	5.58163	2.61836	5.60607	5.43491
2003	8	7	219	6.23386	5.6916	4.79188	5.72699	5.97647	3.04691	6.11603	5.54595
2003	8	8	220	9.03588	8.04219	6.78818	8.13241	8.3446	3.67165	8.24074	8.07002
2003	8	9	221	5.17697	4.6064	3.88909	4.65754	4.78032	2.1097	4.73495	4.61144
2003	8	10	222	8.30856	7.42225	6.26218	7.50415	7.71694	3.46959	7.64935	7.49359
2003	8	11	223	6.29452	5.70467	4.8017	5.75981	5.96646	2.86706	5.95271	5.54595
2003	8	12	224	6.3645	5.76051	4.85381	5.81156	6.02807	2.92681	6.08539	5.54595
2003	8	13	225	7.52465	6.83761	5.75874	6.89155	7.16636	3.5528	7.2689	6.62433
2003	8	14	226	7.42244	6.84262	5.75345	6.86345	7.20314	3.83917	7.43852	6.77838
2003	8	15	227	5.7813	5.43651	4.56092	5.40024	5.73698	3.35547	6.08444	5.54595
2003	8	16	228	6.91495	6.43709	5.4065	6.42869	6.78814	3.78969	7.09892	6.47028
2003	8	17	229	6.3969	5.77851	4.87009	5.83215	6.04192	2.90299	6.08539	5.92899
2003	8	18	230	4.98797	4.5014	3.79417	4.54405	4.7046	2.24862	4.73381	4.61144
2003	8	19	231	6.7709	6.17565	5.20001	6.21602	6.48256	3.28792	6.62514	6.00811
2003	8	20	232	6.5265	5.85051	4.93517	5.91211	6.09543	2.80773	6.08593	5.92899
2003	8	21	233	5.14875	4.58083	3.86502	4.63333	4.74917	2.06559	4.65554	4.61144
2003	8	22	234	6.47531	5.81359	4.90098	5.87597	6.0581	2.78977	6.02045	5.92899
2003	8	23	235	6.14046	5.57424	4.69526	5.61967	5.84004	2.88024	5.91751	5.3919
2003	8	24	236	6.31461	5.72855	4.82451	5.77785	5.99861	2.93569	6.05275	5.54595
2003	8	25	237	7.10408	6.35218	5.35877	6.42181	6.60764	2.98683	6.55573	6.42307
2003	8	26	238	5.76908	5.17123	4.35931	5.22857	5.38286	2.44535	5.31832	5.27021
2003	8	27	239	5.16336	4.59554	3.87896	4.64709	4.76834	2.09809	4.7049	4.61144
2003	8	28	240	5.54567	4.93129	4.16281	4.98671	5.11407	2.23803	5.04471	4.94083
2003	8	29	241	5.08877	4.5574	3.8448	4.60588	4.74594	2.17453	4.7335	4.61144
2003	8	30	242	4.38254	3.91503	3.30313	3.95823	4.07047	1.83011	4.03412	3.95266
2003	8	31	243	6.59001	5.88155	4.96283	5.94681	6.11203	2.73326	6.05078	5.92899
2003	9	1	244	5.90098	5.25204	4.4331	5.31096	5.44953	2.39781	5.37906	5.27021
2003	9	2	245	4.41408	3.92973	3.31614	3.97427	4.07688	1.7884	4.01104	3.95266
2003	9	3	246	4.553	4.06847	3.43171	4.11391	4.22938	1.896	4.17993	4.11735
2003	9	4	247	5.08474	4.54197	3.82958	4.59416	4.71786	2.09102	4.6284	4.61144
2003	9	5	248	5.53556	4.8601	4.10001	4.90998	4.98375	1.91246	4.66991	4.85848
2003	9	6	249	5.56229	5.33306	4.45337	5.26917	5.61418	3.44203	5.84249	5.70001
2003	9	7	250	5.70441	5.58445	4.6499	5.44532	5.84009	3.88638	6.23061	5.51257
2003	9	8	251	3.64469	3.49381	2.92125	3.43999	3.67854	2.29833	3.91727	3.6973
2003	9	9	252	4.31405	3.92689	3.30287	3.96214	4.11301	2.01372	4.08204	3.85135
2003	9	10	253	4.93455	4.46183	3.75745	4.5058	4.66334	2.22303	4.64118	4.61144
2003	9	11	254	2.94877	2.61941	2.21003	2.64967	2.71238	1.16312	2.63737	2.63511
2003	9	12	255	3.41411	3.0552	2.57372	3.09143	3.17369	1.40154	3.08029	3.12919
2003	9	13	256	5.67101	5.06006	4.26123	5.12221	5.2431	2.24273	5.00151	5.18787
2003	9	14	257	4.44905	4.00189	3.37067	4.04634	4.17037	1.91449	4.09543	4.11735
2003	9	15	258	3.87101	3.44087	2.90351	3.48031	3.56544	1.54225	3.48038	3.45858
2003	9	16	259	3.54268	3.19702	2.69293	3.22965	3.33854	1.57465	3.31764	3.29388
2003	9	17	260	4.25683	3.82259	3.21737	3.8685	3.97554	1.77427	3.83054	3.95266
2003	9	18	261	3.65525	3.54028	2.95139	3.47939	3.71783	2.36283	3.89845	3.85135
2003	9	19	262	4.04953	3.96026	3.30307	3.84437	4.13969	2.80869	4.54668	3.8588
2003	9	20	263	4.39418	4.38478	3.64618	4.19488	4.52214	3.30769	5.10438	4.41005
2003	9	21	264	4.53296	4.53932	3.76177	4.37917	4.68915	3.32552	5.09166	4.68568
2003	9	22	265	5.54097	5.48894	4.5631	5.30634	5.70229	3.97562	6.2622	5.51257
2003	9	23	266	5.59785	5.52996	4.60109	5.3481	5.75237	3.99558	6.36402	5.51257
2003	9	24	267	5.09802	4.67553	3.93091	4.70425	4.91188	2.52074	4.97506	4.62163
2003	9	25	268	3.52396	3.18426	2.68117	3.21683	3.32621	1.57297	3.29496	3.29388
2003	9	26	269	3.50668	3.17702	2.67485	3.20708	3.32326	1.60111	3.31842	3.08108
2003	9	27	270	3.47896	3.15926	2.65857	3.18844	3.30689	1.60604	3.29671	3.08108
2003	9	28	271	3.56068	3.20702	2.70197	3.24073	3.34603	1.56142	3.31352	3.29388
2003	9	29	272	3.50524	3.17151	2.66941	3.204	3.31384	1.57129	3.26734	3.29388
2003	9	30	273	3.88467	3.50213	2.94828	3.5408	3.65239	1.69018	3.58687	3.62327
2003	10	1	274	4.81615	4.32507	3.64275	4.37466	4.50227	2.03859	4.36562	4.44674
2003	10	2	275	4.4396	4.00252	3.37181	4.04401	4.17787	1.96004	4.12718	4.11735
2003	10	3	276	2.44722	2.27945	1.91257	2.28038	2.40227	1.32361	2.46436	2.31081
2003	10	4	277	3.3778	3.096	2.6007	3.12012	3.24879	1.63407	3.22317	3.08108
2003	10	5	278	3.47896	3.15926	2.65857	3.18844	3.30689	1.60604	3.28996	3.08108
2003	10	6	279	2.98656	2.7673	2.32438	2.77227	2.91502	1.57945	3.00375	2.77298
2003	10	7	280	4.06761	3.73442	3.13931	3.75605	3.92439	2.02453	3.98024	3.6973
2003	10	8	281	2.88224	2.5768	2.17096	2.60744	2.67539	1.17495	2.58407	2.63511
2003	10	9	282	2.63109	2.3869	2.01021	2.40744	2.49942	1.2232	2.51752	2.31081
2003	10	10	283	3.50668	3.17702	2.67485	3.20708	3.32326	1.60111	3.31384	3.08108
2003	10	11	284	2.67459	2.46521	2.07044	2.47801	2.59218	1.35229	2.61092	2.46487
2003	10	12	285	2.77466	2.64534	2.21372	2.61223	2.78801	1.7074	2.95359	2.77298
2003	10	13	286	3.65721	3.50642	2.9332	3.44697	3.69174	2.32618	3.96316	3.6973
2003	10	14	287	3.1384	2.97477	2.49225	2.94452	3.13767	1.88725	3.33082	3.08108
2003	10	15	288	2.69701	2.54087	2.12916	2.52719	2.68004	1.55632	2.79971	2.61892
2003	10	16	289	3.43324	3.13151	2.63325	3.15802	3.28236	1.62421	3.26414	3.08108
2003	10	17	290	2.80477	2.53941	2.13771	2.56446	2.65485	1.26896	2.63245	2.46487
2003	10	18	291	3.16346	2.86134	2.40899	2.89009	2.99016	1.42162	2.95379	2.9645
2003	10	19	292	3.21206	2.88834	2.43339	2.91994	3.01036	1.3859	2.95301	2.9645
2003	10	20	293	2.15261	1.93321	1.62932	1.95426	2.01423	0.924945	1.98369	1.97633
2003	10	21	294	1.98352	1.77913	1.50001	1.79841	1.85308	0.848791	1.83131	1.81164
2003	10	22	295	2.15347	1.93652	1.63258	1.95648	2.0201	0.94284	2.0124	1.97633
2003	10	23	296	2.08284	1.89586	1.59569	1.91114	1.98724	0.985491	2.00032	1.84865
2003	10	24	297	2.40266	2.1351	1.80212	2.15935	2.21274	0.960118	2.16436	2.14102
2003	10	25	298	2.73051	2.46567	2.0758	2.49175	2.57411	1.20749	2.53628	2.55276
2003	10	26	299	2.16082	1.92929	1.62496	1.95278	2.00044	0.86332	1.90696	1.97633
2003	10	27	300	1.50746	1.44249	1.20451	1.42799	1.51895	0.919514	1.56635	1.54054
2003	10	28	301	3.18736	2.98549	2.50034	2.98656	3.14572	1.74317	3.14853	3.08108
2003	10	29	302	3.64784	3.72737	3.0837	3.52222	3.76341	2.94319	4.05144	3.9277
2003	10	30	303	2.77272	2.6379	2.20638	2.61362	2.78036	1.66714	2.81984	2.77298
2003	10	31	304	2.89568	2.55013	2.15145	2.57802	2.6222	1.03822	2.38607	2.55276
2004	4	1	91	2.55265	2.43584	2.0397	2.39894	2.56715	1.59657	2.75368	2.54189
2004	4	2	92	2.82975	2.64415	2.20958	2.66106	2.77994	1.45845	2.60763	2.77298
2004	4	3	93	3.32271	3.33493	2.76376	3.20762	3.43702	2.47215	3.60608	3.44535
2004	4	4	94	4.59089	4.76452	3.92082	4.50299	4.75858	3.77278	4.87324	3.78078
2004	4	5	95	3.95629	3.89197	3.23975	3.77702	4.05899	2.76913	4.23359	3.8588
2004	4	6	96	3.73471	3.5604	2.98305	3.5042	3.7532	2.34086	4.07459	3.6973
2004	4	7	97	2.60374	2.42961	2.03863	2.42731	2.56155	1.42907	2.62192	2.46487
2004	4	8	98	3.19383	3.01028	2.5248	2.98618	3.17662	1.87738	3.37045	3.08108
2004	4	9	99	4.28156	4.1118	3.44225	4.02567	4.32706	2.78658	4.75474	4.31352
2004	4	10	100	2.99152	2.88375	2.40906	2.83038	3.03201	1.93344	3.22186	3.08108
2004	4	11	101	3.73022	3.53851	2.96138	3.50983	3.73079	2.21693	3.87767	3.6973
2004	4	12	102	2.89551	2.71036	2.2723	2.70645	2.85751	1.60467	2.92971	2.77298
2004	4	13	103	4.01102	3.69451	3.1024	3.71608	3.88324	2.01053	3.86848	3.6973
2004	4	14	104	2.78922	2.527	2.12613	2.55293	2.64116	1.25568	2.58072	2.46487
2004	4	15	105	3.4117	3.13083	2.62584	3.1608	3.28166	1.61711	3.11972	3.15811
2004	4	16	106	4.02182	3.89541	3.23967	3.85526	4.09142	2.50478	3.93819	4.31352
2004	4	17	107	4.0581	3.95183	3.29418	3.86228	4.14139	2.71591	4.30089	3.8588
2004	4	18	108	1.90054	1.69483	1.42801	1.71524	1.75668	0.756289	1.63908	1.72929
2004	4	19	109	1.74394	1.63955	1.37321	1.63537	1.72856	0.982422	1.74783	1.6946
2004	4	20	110	3.75436	3.30049	2.7851	3.33547	3.38974	1.32641	3.12772	3.29388
2004	4	21	111	3.15724	2.80056	2.3643	2.8323	2.8993	1.24429	2.81154	2.7998
2004	4	22	112	1.39461	1.2635	1.06306	1.27647	1.32058	0.627841	1.28095	1.23243
2004	4	23	113	3.10268	2.78248	2.34124	2.81699	2.8901	1.26764	2.67815	2.88215
2004	4	24	114	2.33931	2.11797	1.78048	2.14207	2.21054	1.02815	2.09411	2.22337
2004	4	25	115	3.51568	3.18202	2.67937	3.21277	3.32712	1.5945	3.28738	3.08108
2004	4	26	116	2.57149	2.40039	2.01112	2.40499	2.52819	1.37866	2.52395	2.46487
2004	4	27	117	5.48456	5.14871	4.28887	5.19815	5.40587	2.76754	5.09381	4.16643
2004	4	28	118	6.55616	6.07649	5.09652	6.1032	6.39343	3.38385	6.34791	6.16217
2004	4	29	119	4.21031	4.03969	3.37392	3.98657	4.25218	2.62566	4.42164	4.31352
2004	4	30	120	5.60378	5.05678	4.25367	5.11532	5.2715	2.41861	5.01301	5.27021
2004	5	1	121	2.05325	1.87095	1.57235	1.88899	1.95884	0.95165	1.89962	1.84865
2004	5	2	122	3.24676	3.00672	2.51839	3.02863	3.15881	1.6223	3.04401	3.08108
2004	5	3	123	4.53677	3.97528	3.35513	4.01431	4.07218	1.54998	3.74993	3.95266
2004	5	4	124	2.71452	2.41912	2.03798	2.44849	2.5057	1.06923	2.35018	2.47041
2004	5	5	125	1.95639	1.75628	1.47861	1.7771	1.82683	0.817771	1.7461	1.81164
2004	5	6	126	4.13241	3.77042	3.17185	3.79956	3.95449	1.9769	3.96738	3.6973
2004	5	7	127	4.75412	4.3484	3.65363	4.38484	4.55992	2.26918	4.50151	4.31352
2004	5	8	128	4.46525	3.99028	3.35819	4.04036	4.1355	1.76747	3.86547	4.11735
2004	5	9	129	4.2361	3.81389	3.20978	3.85818	3.97275	1.80804	3.81481	3.95266
2004	5	10	130	4.23602	4.01441	3.34725	4.0207	4.22509	2.34734	4.15239	4.31352
2004	5	11	131	6.28224	5.60459	4.70221	5.68087	5.77608	2.26461	5.08501	5.92899
2004	5	12	132	3.5632	3.18723	2.68203	3.22728	3.30494	1.42059	3.0955	3.29388
2004	5	13	133	4.10045	3.71875	3.12187	3.76473	3.87851	1.77803	3.63049	3.95266
2004	5	14	134	5.32788	4.89597	4.10756	4.93754	5.13659	2.572	4.98949	4.92973
2004	5	15	135	4.01954	3.59435	3.02543	3.63905	3.72768	1.6075	3.48876	3.70562
2004	5	16	136	4.78036	4.42395	3.71203	4.44401	4.65419	2.45573	4.62295	4.46757
2004	5	17	137	4.37909	3.90181	3.29008	3.94741	4.04608	1.75853	3.8891	3.95266
2004	5	18	138	2.8699	2.63873	2.2099	2.66734	2.76398	1.34416	2.56255	2.69595
2004	5	19	139	4.48287	4.06964	3.42085	4.11314	4.2535	2.01672	4.08059	4.00541
2004	5	20	140	3.36759	3.17419	2.65579	3.1673	3.34544	1.90054	3.35476	3.31217
2004	5	21	141	4.89933	4.66919	3.90365	4.62438	4.92011	2.9611	5.08641	4.92973
2004	5	22	142	6.22454	5.64884	4.74959	5.70805	5.90486	2.80732	5.71593	5.54595
2004	5	23	143	4.50346	4.07189	3.422	4.12082	4.24488	1.94136	4.01393	4.28205
2004	5	24	144	6.71672	6.16098	5.17245	6.21203	6.46336	3.23495	6.33731	6.16217
2004	5	25	145	4.0309	3.69989	3.10673	3.72849	3.88325	1.95887	3.8235	3.6973
2004	5	26	146	5.94785	5.49088	4.60639	5.52532	5.77079	2.9829	5.68573	5.54595
2004	5	27	147	4.7889	4.35783	3.6612	4.40367	4.55778	2.17876	4.40552	4.31352
2004	5	28	148	4.97611	4.5327	3.81034	4.5754	4.74628	2.31185	4.66986	4.46757
2004	5	29	149	5.54503	5.02038	4.22039	5.0775	5.23979	2.43709	5.0426	5.27021
2004	5	30	150	6.77072	6.19098	5.19957	6.24751	6.48814	3.19526	6.36047	6.16217
2004	5	31	151	5.76908	5.17123	4.35931	5.22857	5.38286	2.44535	5.28733	5.27021
2004	6	1	152	4.04732	3.69206	3.09801	3.73344	3.86086	1.83562	3.66201	3.6973
2004	6	2	153	4.24517	3.81328	3.20869	3.85968	3.96527	1.76431	3.7788	3.95266
2004	6	3	154	5.58477	5.03115	4.22904	5.09424	5.23439	2.33376	4.95005	5.27021
2004	6	4	155	5.50413	5.00519	4.20739	5.05567	5.23627	2.51657	5.10398	4.92973
2004	6	5	156	8.3581	7.70377	6.47014	7.74379	8.10055	4.2259	8.16836	7.70271
2004	6	6	157	5.50413	5.00519	4.20739	5.05567	5.23627	2.51657	5.13717	4.92973
2004	6	7	158	5.96146	5.48996	4.60474	5.53311	5.76338	2.91731	5.67243	5.54595
2004	6	8	159	6.69834	6.06247	5.09066	6.13875	6.31727	2.8635	5.95739	6.42307
2004	6	9	160	4.6503	4.28083	3.5916	4.31334	4.49461	2.28063	4.42135	4.31352
2004	6	10	161	4.46231	4.17969	3.50048	4.18119	4.404	2.44043	4.45993	4.31352
2004	6	11	162	6.39128	5.97547	5.00429	5.98575	6.29378	3.44327	6.34135	6.16217
2004	6	12	163	6.70016	6.15649	5.16884	6.20209	6.46362	3.27801	6.42146	6.16217
2004	6	13	164	5.44653	4.97319	4.17847	5.01872	5.21071	2.5589	5.13826	4.92973
2004	6	14	165	6.27185	5.67088	4.76911	5.73511	5.91697	2.74476	5.7397	5.92899
2004	6	15	166	6.07486	5.55296	4.66169	5.6077	5.81585	2.83396	5.68814	5.54595
2004	6	16	167	6.28287	5.66005	4.75767	5.73102	5.88869	2.62548	5.61759	5.92899
2004	6	17	168	6.13578	5.57409	4.67956	5.64038	5.81941	2.7058	5.59511	5.54595
2004	6	18	169	5.55943	5.02838	4.22762	5.08628	5.24584	2.42651	5.09174	5.27021
2004	6	19	170	6.38525	5.73388	4.82606	5.80275	5.96331	2.66141	5.75781	5.92899
2004	6	20	171	4.40706	4.00915	3.3644	4.05707	4.18676	1.952	4.01935	4.00541
2004	6	21	172	6.35156	5.71092	4.80489	5.78006	5.94142	2.65838	5.71818	5.92899
2004	6	22	173	5.38228	4.84262	4.07496	4.9001	5.04122	2.27498	4.88147	5.02317
2004	6	23	174	6.89385	6.24996	5.25197	6.32139	6.52501	3.043	6.33039	6.58777
2004	6	24	175	5.27248	4.78162	4.01981	4.83357	4.99557	2.35568	4.87253	4.69865
2004	6	25	176	5.63258	5.07278	4.26813	5.13256	5.28331	2.39745	5.10438	5.27021
2004	6	26	177	4.87811	4.41069	3.7093	4.46064	4.60209	2.13481	4.48186	4.61144
2004	6	27	178	6.66885	6.00396	5.04949	6.07723	6.24835	2.80287	6.01226	6.25838
2004	6	28	179	6.09386	5.49889	4.62236	5.56606	5.72727	2.59022	5.51992	5.7643
2004	6	29	180	5.41641	5.42445	4.50526	5.18871	5.58335	4.09806	6.30137	5.51257
2004	6	30	181	6.42136	6.2502	5.21439	6.09538	6.54919	4.33718	7.1275	6.06382
2004	7	1	182	7.54996	6.8772	5.7812	6.94199	7.20125	3.50764	7.1288	6.77838
2004	7	2	183	6.05043	5.70425	4.77489	5.6846	6.01367	3.44797	6.22337	5.93109
2004	7	3	184	7.22841	6.68302	5.60416	6.72425	7.02468	3.64207	7.01314	6.77838
2004	7	4	185	6.17206	5.60696	4.71051	5.66923	5.85866	2.76251	5.71161	5.54595
2004	7	5	186	6.78872	6.20098	5.20861	6.2592	6.49628	3.18203	6.43478	6.16217
2004	7	6	187	5.99918	5.58885	4.68586	5.59895	5.8869	3.2066	6.03748	5.70001
2004	7	7	188	6.77216	6.19649	5.205	6.2499	6.49706	3.22509	6.49154	6.16217
2004	7	8	189	6.96728	6.29547	5.29357	6.36876	6.56481	3.0199	6.40479	6.58777
2004	7	9	190	7.03641	6.32445	5.31886	6.40339	6.57456	2.90733	6.32592	6.58777
2004	7	10	191	6.65338	6.10472	5.12745	6.15037	6.40807	3.24036	6.43194	6.08514
2004	7	11	192	6.10726	5.57096	4.67796	5.62846	5.83033	2.81014	5.72905	5.54595
2004	7	12	193	5.58708	5.03997	4.23774	5.10064	5.25005	2.38148	5.09564	5.27021
2004	7	13	194	4.91389	4.42397	3.72068	4.47796	4.60405	2.06527	4.4537	4.61144
2004	7	14	195	5.90927	5.30972	4.46667	5.37515	5.52053	2.44879	5.33384	5.51726
2004	7	15	196	4.56463	4.20026	3.51558	4.24796	4.39841	2.12742	4.24954	4.31352
2004	7	16	197	5.98025	5.50888	4.62266	5.5474	5.78645	2.95909	5.76239	5.54595
2004	7	17	198	7.73607	7.21318	6.04422	7.23056	7.596	4.12009	7.7028	7.3946
2004	7	18	199	5.34458	4.91278	4.12349	4.95043	5.15721	2.60913	5.13127	4.92973
2004	7	19	200	7.40401	6.96243	5.82693	6.95552	7.33724	4.12358	7.49222	7.24055
2004	7	20	201	7.03372	6.40265	5.38146	6.46585	6.70087	3.23791	6.61525	6.31622
2004	7	21	202	7.54046	6.84084	5.74533	6.92177	7.13987	3.31079	6.902	7.24654
2004	7	22	203	7.04181	6.4278	5.39829	6.4912	6.73052	3.27041	6.62732	6.39325
2004	7	23	204	6.22962	5.70816	4.79287	5.75713	5.98631	2.98009	5.94905	5.70001
2004	7	24	205	6.93272	6.28098	5.28093	6.35026	6.55924	3.07619	6.4176	6.58777
2004	7	25	206	6.44382	5.86999	4.92752	5.93559	6.13678	2.90959	5.9793	5.85406
2004	7	26	207	6.86611	6.18783	5.20709	6.25905	6.44855	2.95097	6.29441	6.42307
2004	7	27	208	4.97891	4.46669	3.75993	4.52057	4.64314	2.06072	4.50293	4.61144
2004	7	28	209	6.59725	5.91675	4.98187	5.98724	6.15141	2.73845	5.97687	6.09369
2004	7	29	210	4.92674	4.46807	3.75622	4.51662	4.66799	2.20121	4.58478	4.39054
2004	7	30	211	6.38784	5.7438	4.83584	5.81008	5.9811	2.71509	5.85666	5.92899
2004	7	31	212	7.3421	6.59952	5.55399	6.67835	6.86689	3.08174	6.67469	6.83481
2004	8	1	213	7.33304	6.61496	5.56203	6.69459	6.89069	3.12569	6.6946	6.91716
2004	8	2	214	4.82569	4.37497	3.67638	4.42497	4.56751	2.1301	4.43127	4.61144
2004	8	3	215	6.70442	6.0282	5.07183	6.10118	6.2715	2.80606	6.06045	6.25838
2004	8	4	216	6.23945	5.65288	4.75283	5.71523	5.90331	2.76857	5.79613	5.92899
2004	8	5	217	4.91691	4.43554	3.73209	4.4861	4.62454	2.1279	4.52695	4.61144
2004	8	6	218	6.10119	5.47684	4.6078	5.54457	5.69149	2.51048	5.49442	5.68195
2004	8	7	219	5.95691	5.34407	4.49849	5.40854	5.55518	2.4655	5.38687	5.51726
2004	8	8	220	4.96328	4.44812	3.74219	4.50401	4.61712	2.00735	4.43233	4.61144
2004	8	9	221	5.70596	5.14392	4.32748	5.20403	5.35989	2.44566	5.23315	5.35256
2004	8	10	222	6.35919	5.68485	4.7863	5.75479	5.89664	2.551	5.68618	5.84664
2004	8	11	223	6.29519	5.65417	4.75113	5.7285	5.86834	2.53304	5.56302	5.92899
2004	8	12	224	4.55488	4.19751	3.52124	4.22797	4.40844	2.24901	4.39417	4.23649
2004	8	13	225	3.9985	3.68189	3.09046	3.70667	3.8679	1.98268	3.88282	3.6973
2004	8	14	226	6.91616	6.27649	5.27732	6.34228	6.56095	3.11925	6.46584	6.16217
2004	8	15	227	6.30037	5.67401	4.7707	5.74419	5.90409	2.64041	5.68867	5.92899
2004	8	16	228	6.37681	5.78121	4.85808	5.84729	6.03564	2.81477	5.87556	6.09369
2004	8	17	229	6.23139	5.61385	4.72211	5.68096	5.84598	2.64494	5.66106	5.84664
2004	8	18	230	6.84128	6.22547	5.23029	6.29095	6.51111	3.11252	6.37712	6.16217
2004	8	19	231	7.11272	6.38098	5.37133	6.45796	6.63306	2.94389	6.42525	6.58777
2004	8	20	232	6.60319	5.97643	5.02547	6.04327	6.23851	2.90981	6.09938	6.25838
2004	8	21	233	6.36149	5.77706	4.85474	5.84001	6.03722	2.8546	5.91008	5.70001
2004	8	22	234	5.58823	5.04438	4.24209	5.10368	5.25781	2.40534	5.12499	5.27021
2004	8	23	235	4.9401	4.44183	3.73714	4.4956	4.62111	2.06763	4.47874	4.61144
2004	8	24	236	6.6189	5.95921	5.01529	6.02841	6.20742	2.82507	6.06975	6.17603
2004	8	25	237	6.14806	5.64107	4.73803	5.68325	5.92139	2.99425	5.95164	5.62298
2004	8	26	238	4.593	4.22192	3.54363	4.25428	4.43197	2.24222	4.4276	4.23649
2004	8	27	239	4.90331	4.42469	3.72196	4.47591	4.61256	2.11629	4.50529	4.61144
2004	8	28	240	6.7931	6.13808	5.16123	6.20954	6.40069	2.94441	6.23897	6.42307
2004	8	29	241	5.51393	4.99556	4.19723	5.05436	5.21241	2.41054	5.06688	5.27021
2004	8	30	242	5.69133	5.10919	4.30141	5.16976	5.31441	2.37897	5.15953	5.27021
2004	8	31	243	6.57927	5.90241	4.96848	5.97361	6.13558	2.72309	5.92844	6.09369
2004	9	1	244	4.85391	4.40054	3.70045	4.44746	4.59808	2.17421	4.51773	4.31352
2004	9	2	245	4.97991	4.47054	3.76373	4.52354	4.65011	2.0816	4.52172	4.61144
2004	9	3	246	5.09356	4.59795	3.86932	4.64894	4.79671	2.22552	4.71905	4.77613
2004	9	4	247	4.84131	4.39354	3.69413	4.43959	4.59267	2.18347	4.52781	4.31352
2004	9	5	248	4.68056	4.24338	3.56829	4.28863	4.43386	2.09656	4.3615	4.15946
2004	9	6	249	5.43441	5.43445	4.5143	5.20526	5.60134	4.08483	6.31552	5.51257
2004	9	7	250	6.04013	5.9673	4.96758	5.75966	6.20355	4.34516	6.88827	5.92601
2004	9	8	251	4.94483	4.70201	3.93404	4.65711	4.95655	2.97707	5.2185	4.92973
2004	9	9	252	4.88473	4.52171	3.78845	4.55339	4.75105	2.44589	4.68354	4.62163
2004	9	10	253	5.30023	4.88438	4.09745	4.91982	5.12982	2.61702	5.08921	4.92973
2004	9	11	254	5.51865	5.46241	4.53776	5.29955	5.68243	3.89938	6.13618	5.51257
2004	9	12	255	4.57995	4.65463	3.84304	4.46782	4.7608	3.48804	5.16846	3.58179
2004	9	13	256	4.68333	4.54919	3.79517	4.44714	4.77131	3.11987	5.1134	4.41005
2004	9	14	257	5.01453	4.73319	3.96151	4.71392	4.99002	2.87643	5.12996	4.92973
2004	9	15	258	3.66795	3.44282	2.88477	3.43497	3.62992	2.05609	3.74015	3.54325
2004	9	16	259	5.48743	4.98838	4.19146	5.04182	5.21516	2.47943	5.0658	4.92973
2004	9	17	260	4.18296	3.7872	3.18593	3.82748	3.95608	1.86563	3.87944	3.95266
2004	9	18	261	3.59757	3.34263	2.80409	3.3509	3.52006	1.9012	3.58715	3.38919
2004	9	19	262	4.45373	4.18811	3.50937	4.17219	4.41675	2.5332	4.59259	4.31352
2004	9	20	263	4.24946	4.04079	3.38082	4.00221	4.25953	2.55842	4.48536	4.23649
2004	9	21	264	5.15968	4.8176	4.03817	4.82144	5.07609	2.79445	5.18879	4.92973
2004	9	22	265	4.25597	3.81928	3.21411	3.86594	3.96957	1.75637	3.81691	3.95266
2004	9	23	266	3.67748	3.31851	2.79147	3.35693	3.45942	1.58722	3.35834	3.45858
2004	9	24	267	4.39301	4.03196	3.38797	4.05875	4.23472	2.16307	4.25532	4.00541
2004	9	25	268	4.75585	4.31887	3.6319	4.36241	4.51707	2.16499	4.44519	4.23649
2004	9	26	269	4.10909	3.75181	3.15448	3.78254	3.93396	1.95699	3.9338	3.6973
2004	9	27	270	4.10347	3.68749	3.10621	3.72884	3.84094	1.75373	3.76911	3.78797
2004	9	28	271	3.43324	3.13151	2.63325	3.15802	3.28236	1.62421	3.28132	3.08108
2004	9	29	272	4.70573	4.32811	3.63593	4.35384	4.54849	2.34798	4.59415	4.31352
2004	9	30	273	3.4948	3.161	2.65946	3.19513	3.30054	1.54807	3.24299	3.29388
2004	10	1	274	3.65523	3.2782	2.76022	3.31726	3.40821	1.51725	3.29622	3.37623
2004	10	2	275	5.14528	4.6259	3.88662	4.68668	4.80354	2.08544	4.55292	4.85848
2004	10	3	276	4.07582	3.73051	3.13495	3.75979	3.91381	1.96291	3.90244	3.6973
2004	10	4	277	2.74995	2.56828	2.15374	2.5674	2.7071	1.50428	2.77766	2.61892
2004	10	5	278	3.87868	3.84226	3.19417	3.71444	3.9916	2.78294	4.36647	3.8588
2004	10	6	279	4.6425	4.24942	3.56849	4.28708	4.45496	2.20584	4.37711	4.23649
2004	10	7	280	3.48652	3.15875	2.65766	3.19116	3.30145	1.5696	3.23967	3.08108
2004	10	8	281	4.02831	3.68998	3.09694	3.72446	3.86743	1.90518	3.75757	3.6973
2004	10	9	282	3.55538	3.25316	2.73263	3.2812	3.41096	1.69317	3.34871	3.23514
2004	10	10	283	4.07323	3.72059	3.12516	3.75552	3.89777	1.90922	3.80092	3.6973
2004	10	11	284	3.23452	3.01875	2.5311	3.02024	3.18111	1.75483	3.24623	3.08108
2004	10	12	285	3.07036	2.92049	2.44158	2.89775	3.07778	1.82916	3.19878	3.08108
2004	10	13	286	3.91296	3.6372	3.05033	3.64726	3.8298	2.06408	3.87199	3.6973
2004	10	14	287	3.3508	3.081	2.58714	3.10199	3.2361	1.65392	3.22059	3.08108
2004	10	15	288	3.10768	2.88943	2.4243	2.89436	3.04374	1.65612	3.10876	2.92703
2004	10	16	289	2.87186	2.69934	2.26254	2.68821	2.84704	1.63596	2.96314	2.77298
2004	10	17	290	3.62309	3.48181	2.9104	3.42224	3.66378	2.31421	3.92995	3.6973
2004	10	18	291	3.65462	3.49651	2.92341	3.44963	3.6827	2.2725	3.90729	3.6973
2004	10	19	292	3.66308	3.47066	2.905	3.44497	3.65951	2.16297	3.82368	3.62027
2004	10	20	293	3.4678	3.146	2.6459	3.17833	3.28903	1.56792	3.21536	3.08108
2004	10	21	294	2.53491	2.37819	1.99087	2.3785	2.50578	1.39319	2.53456	2.46487
2004	10	22	295	3.57808	3.36235	2.81697	3.35269	3.54531	2.01883	3.63701	3.46622
2004	10	23	296	3.12652	2.95875	2.47686	2.93889	3.11991	1.83421	3.23259	3.08108
2004	10	24	297	2.37651	2.29019	1.91132	2.25515	2.4083	1.50961	2.52648	2.46487
2004	10	25	298	2.52321	2.4263	2.02384	2.39793	2.55259	1.56594	2.63551	2.61892
2004	10	26	299	3.47578	3.37737	2.8138	3.31435	3.54319	2.27424	3.74149	3.6973
2004	10	27	300	3.91346	3.85169	3.20174	3.75366	4.0199	2.69252	4.31753	3.8588
2004	10	28	301	4.0094	3.86097	3.22168	3.80661	4.0608	2.52734	4.27585	4.15946
2004	10	29	302	2.80675	2.63561	2.20226	2.64467	2.77394	1.50315	2.7128	2.77298
2004	10	30	303	3.2257	2.9244	2.46085	2.95325	3.05818	1.46568	3.00768	2.85
2004	10	31	304	2.47827	2.28787	1.91933	2.30222	2.4045	1.24288	2.37404	2.31081
2005	4	1	91	2.13217	1.94197	1.62338	1.9721	2.01989	0.8779	1.7289	1.64286
2005	4	2	92	2.61409	2.34389	1.9681	2.37588	2.42737	1.01566	2.10887	2.47041
2005	4	3	93	2.30298	2.05982	1.73214	2.08647	2.13378	0.902903	1.88973	2.14102
2005	4	4	94	1.13498	1.05735	0.886514	1.05926	1.11374	0.606655	1.09384	1.07838
2005	4	5	95	2.36244	2.21999	1.85762	2.21976	2.33902	1.30485	2.27352	2.31081
2005	4	6	96	3.04876	2.89672	2.41895	2.88521	3.05146	1.76783	2.97454	3.08108
2005	4	7	97	2.56486	2.3986	2.00968	2.39999	2.52733	1.39588	2.51431	2.46487
2005	4	8	98	3.14852	3.04912	2.5345	3.02256	3.20259	1.94251	3.12429	3.38919
2005	4	9	99	4.72447	4.48564	3.74517	4.47232	4.72483	2.71702	4.70372	4.77568
2005	4	10	100	4.51472	4.2154	3.5334	4.21876	4.44158	2.44514	4.4766	4.31352
2005	4	11	101	4.29851	4.08869	3.41822	4.05685	4.30889	2.56083	4.43725	4.31352
2005	4	12	102	3.81725	3.645	3.04747	3.60319	3.84015	2.34027	4.03095	3.85135
2005	4	13	103	3.49307	3.37284	2.80834	3.33697	3.54507	2.16889	3.63534	3.6973
2005	4	14	104	5.22132	4.81793	4.0352	4.86222	5.05456	2.52678	4.78648	4.92973
2005	4	15	105	3.38105	3.07896	2.58348	3.11527	3.21669	1.50815	2.97435	3.08108
2005	4	16	106	3.8249	3.38805	2.85314	3.42858	3.49097	1.39779	3.14568	3.45858
2005	4	17	107	3.90447	3.51313	2.95823	3.55274	3.66051	1.67563	3.52075	3.62327
2005	4	18	108	2.15995	1.92599	1.6217	1.94982	1.99429	0.845425	1.8461	1.97633
2005	4	19	109	1.62207	1.46808	1.23187	1.48751	1.5284	0.682554	1.39356	1.56459
2005	4	20	110	3.33389	3.0457	2.55272	3.08261	3.18316	1.49649	2.93159	3.08108
2005	4	21	111	2.82523	2.6061	2.18754	2.62103	2.73964	1.4227	2.70938	2.61892
2005	4	22	112	3.86682	3.43888	2.89385	3.48195	3.55078	1.4506	3.24153	3.54093
2005	4	23	113	1.20642	1.09374	0.919096	1.10624	1.14188	0.532525	1.0953	1.15286
2005	4	24	114	2.67056	2.44978	2.05522	2.47262	2.56814	1.26878	2.47053	2.46487
2005	4	25	115	4.63872	4.18035	3.51537	4.23104	4.35257	1.9634	4.10159	4.3644
2005	4	26	116	4.13717	3.75328	3.15445	3.79482	3.92067	1.8437	3.74315	3.6973
2005	4	27	117	4.98848	4.46212	3.75484	4.51819	4.62691	1.98883	4.29707	4.61144
2005	4	28	118	4.21129	3.76969	3.17478	3.81492	3.9153	1.72374	3.72149	3.87031
2005	4	29	119	4.03176	3.7032	3.10999	3.72968	3.88844	1.97676	3.8272	3.6973
2005	4	30	120	4.32898	3.85137	3.24229	3.89918	3.9802	1.64712	3.63962	3.95266
2005	5	1	121	2.68459	2.35676	1.98508	2.38004	2.41065	0.888321	2.11133	2.38807
2005	5	2	122	3.06686	2.83397	2.37889	2.84721	2.98111	1.56814	2.96188	2.85
2005	5	3	123	4.84165	4.56899	3.82228	4.55628	4.81565	2.75057	4.79174	4.77568
2005	5	4	124	4.23602	4.01441	3.34725	4.0207	4.22509	2.34734	3.95252	4.31352
2005	5	5	125	3.16936	2.97549	2.4913	2.97327	3.13581	1.7564	3.12178	3.08108
2005	5	6	126	4.77443	4.22856	3.56422	4.27838	4.36242	1.78234	4.04887	4.28205
2005	5	7	127	2.46677	2.22898	1.87682	2.25178	2.32834	1.10108	2.29417	2.30572
2005	5	8	128	4.09483	3.73259	3.13601	3.76942	3.90742	1.89334	3.79449	3.6973
2005	5	9	129	3.45376	3.12172	2.62235	3.1607	3.25191	1.47015	3.03262	3.29388
2005	5	10	130	5.1612	4.6965	3.94851	4.74183	4.91591	2.38165	4.80632	4.62163
2005	5	11	131	4.36352	4.1314	3.45747	4.10505	4.35589	2.55628	4.5061	4.31352
2005	5	12	132	4.35193	4.12826	3.45494	4.0948	4.35258	2.58642	4.54901	4.31352
2005	5	13	133	6.13966	5.58896	4.69423	5.64897	5.8446	2.78633	5.62099	5.54595
2005	5	14	134	4.53891	4.22554	3.54225	4.23649	4.44957	2.40574	4.47423	4.31352
2005	5	15	135	5.54285	5.26588	4.40299	5.22862	5.54998	3.28059	5.70358	5.54595
2005	5	16	136	4.97991	4.47054	3.76373	4.52354	4.65011	2.0816	4.44953	4.61144
2005	5	17	137	3.93456	3.6492	3.06117	3.66262	3.84086	2.04821	3.84917	3.6973
2005	5	18	138	5.28494	5.12684	4.2777	5.01676	5.37983	3.49795	5.77807	5.54595
2005	5	19	139	6.268	5.85096	4.90211	5.86217	6.16247	3.36047	6.22755	6.00811
2005	5	20	140	5.72234	5.36984	4.49737	5.36413	5.65986	3.17645	5.78544	5.54595
2005	5	21	141	5.38893	4.94119	4.14954	4.98091	5.18438	2.60124	5.13826	4.92973
2005	5	22	142	4.3991	4.01697	3.37265	4.05752	4.20559	2.03815	4.08451	4.00541
2005	5	23	143	5.20873	4.70171	3.95117	4.75998	4.89625	2.20774	4.60983	4.94083
2005	5	24	144	4.95993	4.51347	3.79196	4.56094	4.72055	2.25657	4.55575	4.46757
2005	5	25	145	4.17951	3.77398	3.17288	3.81903	3.93309	1.79405	3.75304	3.95266
2005	5	26	146	4.52873	4.09206	3.44082	4.13969	4.26713	1.96294	4.09768	4.28205
2005	5	27	147	4.35446	4.09669	3.42322	4.1052	4.31325	2.36838	4.28143	4.31352
2005	5	28	148	4.82267	4.3634	3.66497	4.41747	4.54745	2.06747	4.30439	4.61144
2005	5	29	149	4.03476	3.62764	3.05002	3.67349	3.77053	1.66217	3.54988	3.78797
2005	5	30	150	3.99569	3.5206	2.96871	3.55941	3.61885	1.42227	3.35335	3.54093
2005	5	31	151	2.82031	2.44923	2.07033	2.46692	2.49412	0.900519	2.30422	2.38807
2005	6	1	152	10.3691	9.18823	7.75279	9.29418	9.49739	3.9921	9.07923	9.22287
2005	6	2	153	4.30176	3.8532	3.24559	3.89873	4.00463	1.77831	3.85039	3.95266
2005	6	3	154	3.85497	3.48563	2.93337	3.5226	3.64	1.71201	3.56554	3.62327
2005	6	4	155	5.06986	4.5543	3.83482	4.60724	4.7402	2.14002	4.59619	4.69378
2005	6	5	156	4.78789	4.35397	3.6574	4.40155	4.55129	2.15788	4.39164	4.31352
2005	6	6	157	6.05607	5.53405	4.64377	5.59248	5.79232	2.79218	5.59408	5.54595
2005	6	7	158	6.06203	5.64983	4.73561	5.66174	5.95041	3.23438	6.02204	5.77703
2005	6	8	159	5.31146	4.7961	4.0322	4.85335	4.9983	2.27993	4.82043	5.02317
2005	6	9	160	6.91185	6.25996	5.26101	6.33241	6.53263	3.02977	6.29559	6.58777
2005	6	10	161	4.9779	4.46283	3.75612	4.51751	4.63614	2.03984	4.43779	4.61144
2005	6	11	162	3.32519	2.99461	2.51787	3.03166	3.11605	1.39355	2.96375	3.12919
2005	6	12	163	4.13285	3.73675	3.13814	3.78411	3.89202	1.75422	3.6738	3.95266
2005	6	13	164	4.92649	4.43097	3.72701	4.48533	4.60913	2.05601	4.40061	4.61144
2005	6	14	165	4.94031	4.53635	3.80801	4.57255	4.76054	2.39554	4.7028	4.5446
2005	6	15	166	4.91389	4.42397	3.72068	4.47796	4.60405	2.06527	4.39422	4.61144
2005	6	16	167	5.45863	4.97238	4.177	5.02365	5.20257	2.5006	5.07635	4.92973
2005	6	17	168	5.91061	5.52221	4.62394	5.53619	5.81479	3.15744	5.85717	5.70001
2005	6	18	169	6.38396	5.72892	4.82117	5.7989	5.95435	2.63456	5.72322	5.92899
2005	6	19	170	6.23057	5.55836	4.67453	5.63001	5.74776	2.38164	5.36612	5.7643
2005	6	20	171	6.88999	6.16435	5.18232	6.24489	6.38464	2.69253	6.00059	6.42307
2005	6	21	172	6.39627	5.72305	4.81463	5.79573	5.93349	2.54213	5.61848	5.92899
2005	6	22	173	6.10467	5.56105	4.66818	5.62319	5.8138	2.75646	5.58668	5.54595
2005	6	23	174	4.38957	4.36715	3.62879	4.20637	4.52262	3.21225	4.99735	4.41005
2005	6	24	175	6.61377	6.19489	5.18821	6.19712	6.52736	3.61707	6.61974	6.39325
2005	6	25	176	6.23557	5.63801	4.73816	5.70575	5.87753	2.68804	5.66719	5.92899
2005	6	26	177	5.51277	4.99115	4.19288	5.0515	5.20477	2.38668	5.00822	5.27021
2005	6	27	178	4.64929	4.27697	3.58779	4.31196	4.4886	2.25976	4.42591	4.31352
2005	6	28	179	7.68223	6.92996	5.82689	7.01338	7.21881	3.27453	6.96435	7.24654
2005	6	29	180	6.85497	6.21894	5.22302	6.29252	6.49079	3.00981	6.2506	6.58777
2005	6	30	181	5.51047	4.98234	4.18419	5.04548	5.18936	2.33896	4.96735	5.27021
2005	7	1	182	5.67002	5.07475	4.26809	5.13987	5.26052	2.24639	4.99843	5.27021
2005	7	2	183	6.02685	5.40128	4.54408	5.46915	5.60651	2.43749	5.36446	5.5996
2005	7	3	184	4.16525	3.75475	3.15441	3.80311	3.90526	1.7304	3.73422	3.95266
2005	7	4	185	5.47937	4.95752	4.16103	5.02219	5.16198	2.31241	4.91398	5.27021
2005	7	5	186	5.42637	4.94315	4.14949	4.99839	5.16782	2.45018	5.01052	4.92973
2005	7	6	187	4.15704	3.75867	3.15877	3.80383	3.91835	1.79203	3.77758	3.95266
2005	7	7	188	5.68557	5.08715	4.27967	5.15176	5.27421	2.25967	5.02859	5.27021
2005	7	8	189	5.74548	5.12797	4.31729	5.19157	5.31264	2.26505	5.08351	5.27021
2005	7	9	190	4.92649	4.43097	3.72701	4.48533	4.60913	2.05601	4.44864	4.61144
2005	7	10	191	5.00008	4.46526	3.75736	4.52173	4.6246	1.95869	4.4058	4.61144
2005	7	11	192	6.66413	5.96667	5.02033	6.04168	6.19023	2.67601	5.94012	6.17603
2005	7	12	193	5.00209	4.47297	3.76497	4.52859	4.63889	2.00044	4.46415	4.61144
2005	7	13	194	5.67117	5.07915	4.27244	5.1437	5.26864	2.27025	5.04674	5.27021
2005	7	14	195	6.19781	5.53604	4.65395	5.60844	5.72684	2.3787	5.38965	5.7643
2005	7	15	196	5.60897	5.02952	4.22611	5.09625	5.21388	2.21715	4.93128	5.27021
2005	7	16	197	4.11125	3.72475	3.12729	3.77123	3.88304	1.77009	3.71727	3.95266
2005	7	17	198	5.24731	4.79801	4.02966	4.84182	5.02831	2.47633	4.97581	4.77568
2005	7	18	199	5.60148	5.04797	4.24497	5.10918	5.25593	2.37089	5.07961	5.27021
2005	7	19	200	5.99747	5.38897	4.53333	5.45538	5.60292	2.48534	5.41944	5.5996
2005	7	20	201	6.49922	5.9142	4.96878	5.9764	6.18555	2.95689	6.07899	5.85406
2005	7	21	202	6.40016	5.73792	4.8293	5.80823	5.96075	2.62265	5.76431	5.92899
2005	7	22	203	5.72993	5.11556	4.30571	5.17963	5.29895	2.25178	5.06755	5.27021
2005	7	23	204	6.64456	5.94697	5.00166	6.02328	6.16467	2.63249	5.8811	6.17603
2005	7	24	205	5.61242	5.04275	4.23916	5.10743	5.238	2.28873	5.02308	5.27021
2005	7	25	206	5.41231	4.81834	4.05694	4.878	4.98305	2.08127	4.75713	4.94083
2005	7	26	207	4.5224	4.02498	3.38983	4.07439	4.16323	1.74476	3.99113	4.11735
2005	7	27	208	5.01368	4.47612	3.7675	4.53218	4.63658	1.9703	4.4509	4.61144
2005	7	28	209	5.73108	5.11997	4.31006	5.18358	5.30713	2.27564	5.10681	5.27021
2005	7	29	210	4.98949	4.46597	3.75865	4.5215	4.63401	2.0097	4.47166	4.61144
2005	7	30	211	5.39773	4.80671	4.04609	4.86674	4.97021	2.06882	4.74447	4.94083
2005	7	31	212	5.03385	4.47083	3.76113	4.52659	4.60956	1.84739	4.32577	4.61144
2005	8	1	213	4.81474	4.26877	3.5944	4.3204	4.40097	1.77264	4.15849	4.3644
2005	8	2	214	4.92548	4.42712	3.7232	4.48237	4.60219	2.03513	4.42086	4.61144
2005	8	3	215	5.89281	5.33883	4.48879	5.39772	5.57535	2.61476	5.47917	5.5996
2005	8	4	216	6.14225	5.59888	4.70402	5.65413	5.86113	2.84001	5.80733	5.54595
2005	8	5	217	5.74663	5.13238	4.32164	5.19549	5.32082	2.28891	5.12788	5.27021
2005	8	6	218	4.92347	4.4194	3.71559	4.47617	4.58822	1.99338	4.39977	4.61144
2005	8	7	219	6.64569	6.03322	5.06422	6.10706	6.29515	2.9022	6.07111	6.42307
2005	8	8	220	6.21807	5.62405	4.72513	5.69268	5.86213	2.67311	5.67758	5.92899
2005	8	9	221	5.00209	4.47297	3.76497	4.52859	4.63889	2.00044	4.4509	4.61144
2005	8	10	222	5.90899	5.27542	4.44027	5.3415	5.46454	2.32214	5.21746	5.43491
2005	8	11	223	4.95169	4.44497	3.73966	4.49994	4.61918	2.03749	4.46685	4.61144
2005	8	12	224	4.8897	4.41383	3.71183	4.46572	4.60059	2.10467	4.49435	4.61144
2005	8	13	225	6.22066	5.63396	4.73491	5.69917	5.87937	2.72679	5.74102	5.92899
2005	8	14	226	4.90129	4.41697	3.71435	4.47053	4.59894	2.07453	4.47219	4.61144
2005	8	15	227	4.90129	4.41697	3.71435	4.47053	4.59894	2.07453	4.46523	4.61144
2005	8	16	228	6.1931	5.52384	4.64989	5.59282	5.71882	2.41628	5.47712	5.68195
2005	8	17	229	4.90129	4.41697	3.71435	4.47053	4.59894	2.07453	4.46739	4.61144
2005	8	18	230	5.57153	5.02756	4.22616	5.08897	5.23636	2.3682	5.0736	5.27021
2005	8	19	231	5.96687	5.37197	4.51797	5.43752	5.59063	2.50783	5.40192	5.5996
2005	8	20	232	4.97689	4.45897	3.75232	4.51436	4.6291	2.01896	4.45146	4.61144
2005	8	21	233	6.31916	5.69292	4.78862	5.76098	5.92832	2.68219	5.76234	5.92899
2005	8	22	234	4.84131	4.39354	3.69413	4.43959	4.59267	2.18347	4.53587	4.31352
2005	8	23	235	5.31888	4.76997	4.01356	4.82912	4.95446	2.1731	4.78764	4.94083
2005	8	24	236	4.26504	3.81867	3.21301	3.86668	3.96174	1.71265	3.8057	3.95266
2005	8	25	237	4.3415	3.92153	3.29604	3.96906	4.08628	1.85843	3.9428	4.11735
2005	8	26	238	4.364	3.99747	3.35502	4.03484	4.18972	2.06395	4.14174	4.00541
2005	8	27	239	4.77328	4.33926	3.64346	4.38928	4.53278	2.12539	4.4159	4.31352
2005	8	28	240	5.87792	5.28835	4.44697	5.35409	5.50016	2.44597	5.28852	5.51726
2005	8	29	241	4.57647	4.12164	3.46786	4.1702	4.29269	1.94793	4.18173	4.28205
2005	8	30	242	3.86803	3.60659	3.02211	3.61528	3.798	2.06005	3.86208	3.6973
2005	8	31	243	5.22858	5.07009	4.22394	4.98671	5.32288	3.37261	5.64158	5.54595
2005	9	1	244	5.73492	5.2351	4.39347	5.29152	5.47733	2.62581	5.34288	5.23784
2005	9	2	245	4.21104	3.78867	3.18589	3.83577	3.94041	1.75234	3.79348	3.95266
2005	9	3	246	4.96328	4.44812	3.74219	4.50401	4.61712	2.00735	4.38384	4.61144
2005	9	4	247	4.13374	3.8818	3.25164	3.87419	4.09227	2.31349	4.20627	4.00541
2005	9	5	248	4.54567	4.44634	3.69964	4.34967	4.65353	3.0481	4.93111	4.41005
2005	9	6	249	5.19601	5.15105	4.28301	4.97169	5.34686	3.75511	5.88006	5.16803
2005	9	7	250	3.85723	3.60059	3.01668	3.60749	3.79229	2.06798	3.82919	3.6973
2005	9	8	251	4.76471	4.34769	3.65235	4.38957	4.55305	2.21816	4.47881	4.31352
2005	9	9	252	4.44013	4.17726	3.49924	4.16273	4.40477	2.52159	4.55998	4.31352
2005	9	10	253	4.10753	3.85806	3.22928	3.85642	4.06543	2.27253	4.12454	4.00541
2005	9	11	254	4.67651	4.29869	3.60806	4.33163	4.51255	2.28299	4.47932	4.31352
2005	9	12	255	4.12955	3.80967	3.19548	3.83598	4.00226	2.05282	3.98183	3.85135
2005	9	13	256	3.73843	3.53459	2.95702	3.51911	3.72593	2.1553	3.84888	3.6973
2005	9	14	257	4.61981	4.20963	3.53778	4.25023	4.4074	2.14121	4.34541	4.15946
2005	9	15	258	4.17951	3.77398	3.17288	3.81903	3.93309	1.79405	3.79722	3.95266
2005	9	16	259	4.64253	4.19495	3.52977	4.24088	4.37822	2.04243	4.30154	4.3644
2005	9	17	260	3.49336	3.15549	2.65402	3.19164	3.29096	1.51825	3.20634	3.29388
2005	9	18	261	4.63061	4.18832	3.52378	4.23355	4.37321	2.0512	4.29465	4.3644
2005	9	19	262	4.20197	3.78928	3.18699	3.83423	3.9478	1.79607	3.8272	3.95266
2005	9	20	263	4.26763	3.82859	3.2228	3.87478	3.97983	1.76633	3.85098	3.95266
2005	9	21	264	3.82211	3.45701	2.90649	3.49682	3.60652	1.66822	3.51575	3.62327
2005	9	22	265	4.04904	3.69867	3.10453	3.73686	3.87181	1.87141	3.79088	3.6973
2005	9	23	266	3.23902	2.92091	2.45664	2.95555	3.0431	1.38447	2.93925	3.04684
2005	9	24	267	4.54332	4.12735	3.46746	4.17319	4.31262	2.03352	4.17671	4.08244
2005	9	25	268	5.17849	4.67431	3.92538	4.73506	4.86326	2.16048	4.56111	4.94083
2005	9	26	269	2.7558	2.53315	2.12618	2.55257	2.65918	1.34533	2.63038	2.54189
2005	9	27	270	2.04245	1.86495	1.56692	1.88202	1.95402	0.959588	1.92767	1.84865
2005	9	28	271	4.2577	3.82589	3.22063	3.87098	3.98148	1.79217	3.8537	3.95266
2005	9	29	272	3.76667	3.34252	2.81861	3.38186	3.45579	1.45117	3.2971	3.37623
2005	9	30	273	1.54868	1.41019	1.18578	1.42316	1.47683	0.721205	1.45587	1.38649
2005	10	1	274	3.65539	3.36957	2.82795	3.39103	3.54081	1.82474	3.52375	3.38919
2005	10	2	275	3.77703	3.41179	2.87156	3.4485	3.56134	1.66599	3.48265	3.54093
2005	10	3	276	2.04015	1.83324	1.54322	1.85485	1.90779	0.858746	1.84094	1.89398
2005	10	4	277	2.80658	2.62828	2.20284	2.62531	2.77065	1.55284	2.83798	2.69595
2005	10	5	278	2.87092	2.80498	2.33671	2.73689	2.93569	1.94487	3.14465	2.75628
2005	10	6	279	3.7591	3.73782	3.11188	3.57649	3.86214	2.81554	4.3759	3.72098
2005	10	7	280	4.15901	3.90196	3.27045	3.89183	4.11452	2.33506	4.24177	4.00541
2005	10	8	281	2.90908	2.83324	2.36294	2.76412	2.96835	1.96315	3.19949	2.75628
2005	10	9	282	4.39174	4.15697	3.48154	4.12341	4.38422	2.60039	4.58928	4.31352
2005	10	10	283	3.11199	3.0093	2.51242	2.94922	3.16109	2.03529	3.39062	3.23514
2005	10	11	284	2.96841	2.75086	2.30891	2.7594	2.89605	1.55109	2.93065	2.77298
2005	10	12	285	2.00422	1.84229	1.54631	1.85641	1.93395	0.978424	1.90672	1.84865
2005	10	13	286	3.25468	3.03702	2.54829	3.03413	3.20194	1.78634	3.30821	3.08108
2005	10	14	287	3.50837	3.19902	2.68888	3.22839	3.35102	1.64102	3.2971	3.15811
2005	10	15	288	2.05865	1.87395	1.57506	1.89244	1.96123	0.947681	1.91665	1.84865
2005	10	16	289	1.47957	1.30599	1.10102	1.3208	1.34402	0.53451	1.24186	1.31755
2005	10	17	290	1.12317	1.01724	0.854915	1.02902	1.06155	0.492337	1.00371	1.07051
2005	10	18	291	3.58293	3.17947	2.68111	3.21689	3.28721	1.38038	3.11066	3.21154
2005	10	19	292	0.361792	0.321998	0.271187	0.325951	0.333059	0.139581	0.306183	0.329388
2005	10	20	293	0.710272	0.665261	0.556469	0.66724	0.700349	0.379901	0.668238	0.693244
2005	10	21	294	1.5359	1.463	1.22351	1.44845	1.54181	0.929494	1.58147	1.54054
2005	10	22	295	2.30394	2.24798	1.87298	2.19567	2.35414	1.5506	2.46146	2.20503
2005	10	23	296	2.38371	2.29419	1.91493	2.26104	2.41325	1.50432	2.49315	2.46487
2005	10	24	297	1.81565	1.73895	1.45302	1.71687	1.83108	1.12629	1.90129	1.84865
2005	10	25	298	2.51504	2.3728	1.98654	2.36235	2.50186	1.44485	2.55862	2.46487
2005	10	26	299	2.53059	2.38521	1.99812	2.37314	2.51555	1.45813	2.59974	2.46487
2005	10	27	300	2.51428	2.34554	1.96721	2.34599	2.47199	1.36642	2.51787	2.38784
2005	10	28	301	2.07074	1.88491	1.58538	1.90183	1.97425	0.966586	1.94572	1.84865
2005	10	29	302	1.84784	1.73846	1.45081	1.74672	1.82876	0.982187	1.69292	1.84865
2005	10	30	303	2.48687	2.40945	2.00104	2.39323	2.53034	1.51761	2.37692	2.69595
2005	10	31	304	3.24011	3.04758	2.55174	3.04079	3.21263	1.82237	3.19692	3.15811
2006	4	1	91	1.94266	1.80103	1.50832	1.81349	1.89262	0.977346	1.81482	1.84865
2006	4	2	92	2.52666	2.21888	1.87139	2.24169	2.27493	0.869593	2.05363	2.22337
2006	4	3	93	0.497328	0.459563	0.385766	0.461709	0.483423	0.254294	0.479027	0.462163
2006	4	4	94	2.03489	1.85368	1.55606	1.8744	1.93793	0.918819	1.80567	1.84865
2006	4	5	95	3.21434	2.87052	2.41545	2.90683	2.97296	1.25916	2.69568	2.9645
2006	4	6	96	2.04056	1.83482	1.54478	1.856	1.91063	0.867321	1.82137	1.89398
2006	4	7	97	1.86476	1.64688	1.38985	1.66547	1.69821	0.695497	1.59204	1.64694
2006	4	8	98	0.726535	0.649404	0.547626	0.656746	0.67499	0.3017	0.656553	0.658777
2006	4	9	99	2.51591	2.35256	1.96624	2.36585	2.47417	1.30833	2.38589	2.46487
2006	4	10	100	4.15192	3.70356	3.1197	3.74861	3.83814	1.64709	3.60976	3.78797
2006	4	11	101	2.85344	2.5608	2.15649	2.59076	2.66405	1.19612	2.5447	2.63511
2006	4	12	102	2.24268	1.9776	1.6689	1.9996	2.03656	0.821679	1.90286	1.97633
2006	4	13	103	2.58647	2.29548	1.93694	2.32194	2.37568	1.0131	2.28124	2.30572
2006	4	14	104	1.55696	1.46999	1.22937	1.46639	1.54916	0.883131	1.56329	1.54054
2006	4	15	105	2.57121	2.37574	1.98647	2.40216	2.48962	1.21827	2.34452	2.46487
2006	4	16	106	1.63617	1.45349	1.22441	1.47114	1.50177	0.622162	1.3955	1.48225
2006	4	17	107	3.7958	3.36941	2.83605	3.41086	3.47514	1.40297	3.14593	3.45858
2006	4	18	108	3.24632	2.86846	2.41957	2.90123	2.95689	1.2026	2.76246	2.88215
2006	4	19	109	2.08651	1.89225	1.59188	1.91131	1.97855	0.945731	1.93349	1.84865
2006	4	20	110	2.14764	1.93186	1.62824	1.95211	2.01497	0.937861	1.9948	1.97633
2006	4	21	111	2.89491	2.57819	2.17167	2.60969	2.66862	1.12858	2.48504	2.63511
2006	4	22	112	3.5488	3.191	2.68658	3.22782	3.32283	1.50838	3.18678	3.29388
2006	4	23	113	1.904	1.77672	1.48608	1.78644	1.86869	0.987235	1.81324	1.84865
2006	4	24	114	4.52597	3.96928	3.34971	4.00912	4.06853	1.55792	3.72756	3.95266
2006	4	25	115	1.66467	1.63811	1.36023	1.60242	1.71096	1.12608	1.73143	1.65377
2006	4	26	116	4.39282	4.45345	3.68338	4.25962	4.55294	3.37603	4.77168	4.68568
2006	4	27	117	4.27129	4.06697	3.39795	4.03815	4.28493	2.53759	4.2774	4.31352
2006	4	28	118	3.4138	3.116	2.61878	3.14381	3.26525	1.60761	3.17713	3.08108
2006	4	29	119	3.31999	3.15474	2.63099	3.15181	3.32132	1.88442	3.246	3.38919
2006	4	30	120	4.1834	3.75353	3.15221	3.8044	3.88987	1.64295	3.54021	3.95266
2006	5	1	121	3.49805	3.14396	2.64224	3.18478	3.26519	1.42216	3.01853	3.29388
2006	5	2	122	4.8771	4.40683	3.7055	4.45813	4.59537	2.11393	4.37097	4.61144
2006	5	3	123	3.45808	3.13824	2.63866	3.17114	3.28048	1.55962	3.16763	3.08108
2006	5	4	124	4.0818	3.7586	3.15484	3.78389	3.94848	2.02399	3.88857	3.77433
2006	5	5	125	4.02831	3.68998	3.09694	3.72446	3.86743	1.90518	3.71281	3.6973
2006	5	6	126	4.10477	3.73528	3.13817	3.77457	3.90667	1.86751	3.74029	3.6973
2006	5	7	127	3.99763	3.67859	3.0872	3.70557	3.86279	1.96479	3.79149	3.6973
2006	5	8	128	6.0172	5.49125	4.60304	5.55875	5.73679	2.68178	5.40613	5.54595
2006	5	9	129	3.2482	3.01223	2.52383	3.03016	3.16701	1.65212	3.05938	3.08108
2006	5	10	130	4.03003	3.69659	3.10347	3.72722	3.87801	1.94097	3.77668	3.6973
2006	5	11	131	3.43036	3.12049	2.62238	3.15264	3.26411	1.56456	3.14982	3.08108
2006	5	12	132	4.80912	4.49737	3.76815	4.49998	4.73874	2.61727	4.76269	4.62163
2006	5	13	133	4.85291	4.39669	3.69665	4.44518	4.59147	2.15333	4.41215	4.61144
2006	5	14	134	5.32671	5.02433	4.20448	5.00869	5.29623	3.03086	5.37835	5.23784
2006	5	15	135	5.16712	4.99229	4.16518	4.90718	5.24612	3.32543	5.50534	5.3919
2006	5	16	136	7.50086	6.81884	5.72544	6.89743	7.12293	3.3399	6.78157	6.77838
2006	5	17	137	5.31709	4.64797	3.92317	4.69025	4.75156	1.76891	4.29787	4.61144
2006	5	18	138	3.69713	3.33191	2.80382	3.37026	3.47229	1.58898	3.32475	3.45858
2006	5	19	139	4.67852	4.3064	3.61567	4.33424	4.52453	2.32475	4.49591	4.31352
2006	5	20	140	4.37795	3.95061	3.32318	3.99635	4.11836	1.88954	3.96031	4.11735
2006	5	21	141	5.29081	4.75084	3.99592	4.81032	4.93629	2.17058	4.66094	4.94083
2006	5	22	142	4.6125	4.14472	3.48902	4.19356	4.31327	1.94151	4.17081	4.28205
2006	5	23	143	5.35592	4.83157	4.06532	4.88664	5.03745	2.3179	4.88304	5.02317
2006	5	24	144	3.89268	3.71439	3.10496	3.67594	3.91342	2.36806	4.1115	3.92838
2006	5	25	145	5.04065	4.98688	4.15077	4.80754	5.17919	3.64971	5.7907	4.96131
2006	5	26	146	7.29524	6.59396	5.54305	6.67195	6.87508	3.15347	6.64779	6.91716
2006	5	27	147	7.11564	6.41437	5.38879	6.49698	6.67149	2.95611	6.31456	6.75246
2006	5	28	148	6.23557	5.63801	4.73816	5.70575	5.87753	2.68804	5.65488	5.92899
2006	5	29	149	4.51472	4.2154	3.5334	4.21876	4.44158	2.44514	4.53236	4.31352
2006	5	30	150	4.77932	4.3624	3.66629	4.40133	4.57135	2.25066	4.52899	4.31352
2006	5	31	151	5.81696	5.41392	4.53641	5.4337	5.69849	3.05132	5.73941	5.54595
2006	6	1	152	7.09185	6.35996	5.35141	6.43883	6.60594	2.89747	6.31149	6.58777
2006	6	2	153	6.07616	5.55792	4.66658	5.60999	5.82393	2.8608	5.73033	5.54595
2006	6	3	154	6.19344	5.6358	4.73821	5.69019	5.89909	2.85798	5.83529	5.54595
2006	6	4	155	6.32304	5.7078	4.8033	5.77109	5.95453	2.76272	5.83687	5.92899
2006	6	5	156	7.15016	6.40649	5.39484	6.48312	6.65728	2.94725	6.45707	6.58777
2006	6	6	157	5.53812	4.99393	4.1943	5.0591	5.19332	2.29393	4.92447	5.27021
2006	6	7	158	6.27769	5.64021	4.73811	5.71521	5.85294	2.51811	5.46115	5.92899
2006	6	8	159	6.92265	6.24241	5.24288	6.32387	6.49165	2.86741	6.07288	6.58777
2006	6	9	160	5.73078	5.34909	4.47616	5.37266	5.62848	3.00348	5.53522	5.54595
2006	6	10	161	5.04103	4.74038	3.96727	4.73567	4.99557	2.80754	5.03699	4.92973
2006	6	11	162	5.66727	5.31805	4.44851	5.32672	5.60069	3.07795	5.54366	5.54595
2006	6	12	163	6.06179	5.61056	4.70423	5.643	5.8989	3.07489	5.83932	5.70001
2006	6	13	164	6.85353	6.21343	5.21759	6.28902	6.48129	2.97998	6.1547	6.58777
2006	6	14	165	5.43962	4.94675	4.15237	5.00481	5.16662	2.41574	4.93435	4.92973
2006	6	15	166	5.27143	4.86838	4.08298	4.90024	5.1159	2.63819	5.04539	4.92973
2006	6	16	167	5.70346	5.16901	4.34482	5.22705	5.39725	2.52417	5.21017	5.43491
2006	6	17	168	6.15974	5.61284	4.71705	5.66697	5.87653	2.85495	5.77309	5.54595
2006	6	18	169	5.31348	4.88797	4.10033	4.92795	5.12983	2.58258	5.05128	4.92973
2006	6	19	170	6.15995	5.73466	4.80734	5.74952	6.03871	3.26494	6.12139	5.85406
2006	6	20	171	5.38778	4.93678	4.14519	4.97914	5.17735	2.57738	5.1198	4.92973
2006	6	21	172	7.46285	6.8029	5.71153	6.87608	7.11589	3.40181	6.92656	6.77838
2006	6	22	173	6.28676	5.67492	4.77235	5.74164	5.91504	2.70601	5.72107	5.92899
2006	6	23	174	5.61242	5.04275	4.23916	5.10743	5.238	2.28873	4.98405	5.27021
2006	6	24	175	6.04337	5.41447	4.55639	5.48173	5.62105	2.4516	5.38796	5.5996
2006	6	25	176	7.04017	6.30565	5.30774	6.38309	6.54724	2.86457	6.2936	6.50542
2006	6	26	177	6.49477	5.78201	4.86833	5.85361	5.97966	2.49753	5.68789	5.92899
2006	6	27	178	6.1162	5.44292	4.58095	5.51104	5.62407	2.31932	5.30915	5.5996
2006	6	28	179	5.93581	5.31262	4.46815	5.3808	5.50711	2.35169	5.23438	5.51726
2006	6	29	180	6.85966	6.04946	5.10057	6.11713	6.22195	2.45987	5.8058	6.09369
2006	6	30	181	4.68928	4.2178	3.55013	4.26717	4.39142	1.98761	4.26494	4.3644
2006	7	1	182	6.42997	5.74601	4.83579	5.81812	5.95512	2.54515	5.69564	5.92899
2006	7	2	183	6.21158	5.59031	4.69962	5.66072	5.81334	2.57727	5.58835	5.84664
2006	7	3	184	7.42559	6.71169	5.63806	6.7955	6.9916	3.16081	6.73752	7.08185
2006	7	4	185	4.30652	3.83606	3.22818	3.88438	3.9659	1.6451	3.74346	3.95266
2006	7	5	186	5.64153	5.03997	4.24272	5.10259	5.22421	2.24008	4.96616	5.18787
2006	7	6	187	2.12259	1.90664	1.60434	1.92984	1.98264	0.882156	1.90241	1.97633
2006	7	7	188	5.30253	4.89319	4.10615	4.92255	5.14328	2.66475	5.15433	4.92973
2006	7	8	189	4.72691	4.32669	3.63337	4.36502	4.53596	2.24595	4.47778	4.31352
2006	7	9	190	6.17336	5.61192	4.7154	5.67204	5.86705	2.78936	5.73454	5.54595
2006	7	10	191	6.20536	5.56497	4.68249	5.63397	5.7802	2.53528	5.5413	5.7643
2006	7	11	192	7.16385	6.39996	5.38757	6.47947	6.63391	2.84454	6.32954	6.58777
2006	7	12	193	5.61473	5.05156	4.24786	5.11436	5.25389	2.33645	5.05521	5.27021
2006	7	13	194	4.89827	4.4054	3.70294	4.46179	4.57824	2.0119	4.37086	4.61144
2006	7	14	195	5.16456	4.61349	3.88106	4.6724	4.77736	2.01661	4.51972	4.77613
2006	7	15	196	5.68788	5.09597	4.28836	5.15927	5.2904	2.30739	5.08091	5.27021
2006	7	16	197	5.74663	5.13238	4.32164	5.19549	5.32082	2.28891	5.12091	5.27021
2006	7	17	198	6.47857	5.77301	4.8602	5.84483	5.97358	2.50943	5.68867	5.92899
2006	7	18	199	5.70228	5.10397	4.2956	5.16743	5.29602	2.2968	5.0848	5.27021
2006	7	19	200	5.85077	5.24697	4.41492	5.31203	5.4499	2.39041	5.26323	5.43491
2006	7	20	201	5.61357	5.04715	4.24351	5.11095	5.24596	2.31259	5.04101	5.27021
2006	7	21	202	7.7749	6.96072	5.8527	7.05097	7.21439	3.07053	6.85394	7.24654
2006	7	22	203	8.09659	7.21006	6.06913	7.30011	7.45532	3.10324	7.08383	7.41124
2006	7	23	204	7.79634	6.92779	5.83439	7.01255	7.15675	2.95471	6.80313	7.08185
2006	7	24	205	6.49736	5.79192	4.87812	5.86291	5.99827	2.55121	5.75838	5.92899
2006	7	25	206	6.01521	5.40683	4.55026	5.47142	5.62589	2.5248	5.47299	5.5996
2006	7	26	207	6.33136	5.63497	4.74577	5.70415	5.82853	2.44267	5.56362	5.7643
2006	7	27	208	6.41377	5.73701	4.82765	5.8091	5.94889	2.55706	5.7078	5.92899
2006	7	28	209	7.01553	6.30343	5.29895	6.38429	6.54749	2.86091	6.27413	6.58777
2006	7	29	210	5.78082	5.2606	4.41652	5.32034	5.49747	2.59208	5.3756	5.23784
2006	7	30	211	6.08847	5.55205	4.66004	5.61302	5.80669	2.76836	5.66788	5.54595
2006	7	31	212	7.03785	6.32996	5.32429	6.40762	6.58447	2.93716	6.35762	6.58777
2006	8	1	213	6.39627	5.72305	4.81463	5.79573	5.93349	2.54213	5.65047	5.92899
2006	8	2	214	5.77428	5.14397	4.33176	5.20739	5.32354	2.24388	5.0994	5.27021
2006	8	3	215	5.86684	5.2333	4.40827	5.29694	5.42345	2.32741	5.2401	5.35256
2006	8	4	216	6.24716	5.5437	4.67476	5.60893	5.73155	2.40681	5.53175	5.5996
2006	8	5	217	6.19759	5.50415	4.63785	5.57046	5.68791	2.36449	5.43596	5.5996
2006	8	6	218	6.33406	5.69696	4.79187	5.76686	5.92602	2.64344	5.74927	5.92899
2006	8	7	219	8.65796	7.70273	6.48459	7.79836	7.96039	3.29424	7.56904	7.90532
2006	8	8	220	6.22291	5.53634	4.6608	5.60507	5.72153	2.36774	5.44025	5.68195
2006	8	9	221	4.87609	4.40297	3.70169	4.45554	4.58861	2.09305	4.44351	4.61144
2006	8	10	222	5.74778	5.13678	4.32599	5.19931	5.32897	2.31277	5.14729	5.27021
2006	8	11	223	5.42688	4.82997	4.0678	4.88927	4.99588	2.09372	4.77776	4.94083
2006	8	12	224	7.21928	6.43547	5.42013	6.51434	6.66474	2.83468	6.42259	6.58777
2006	8	13	225	7.14585	6.38996	5.37853	6.46941	6.62699	2.85777	6.36798	6.58777
2006	8	14	226	5.02628	4.48312	3.77383	4.5391	4.64136	1.96104	4.43882	4.61144
2006	8	15	227	5.48446	4.92976	4.14877	4.98865	5.12949	2.30202	4.99925	5.10552
2006	8	16	228	7.20416	6.43649	5.42196	6.51399	6.67833	2.90756	6.47561	6.58777
2006	8	17	229	6.65585	6.01016	5.0564	6.07791	6.26908	2.90044	6.16477	6.25838
2006	8	18	230	6.27314	5.67584	4.774	5.73822	5.92557	2.7716	5.82805	5.92899
2006	8	19	231	6.62789	5.92506	4.98853	5.99795	6.14579	2.65879	5.9311	6.09369
2006	8	20	232	6.68216	6.14649	5.1598	6.18997	6.45509	3.29124	6.4984	6.16217
2006	8	21	233	6.23945	5.65288	4.75283	5.71523	5.90331	2.76857	5.82211	5.92899
2006	8	22	234	9.17447	8.24911	6.9404	8.34898	8.58206	3.83988	8.34846	8.5641
2006	8	23	235	6.94928	6.28547	5.28453	6.35785	6.5573	3.03313	6.41271	6.58777
2006	8	24	236	7.90056	7.12235	5.99189	7.20558	7.42138	3.38629	7.25258	7.41124
2006	8	25	237	7.97594	7.2358	6.08557	7.31015	7.56478	3.60622	7.4989	7.08649
2006	8	26	238	7.14728	6.39547	5.38397	6.47411	6.63713	2.8876	6.41414	6.58777
2006	8	27	239	5.60148	5.04797	4.24497	5.10918	5.25593	2.37089	5.09185	5.27021
2006	8	28	240	6.18961	5.55622	4.67458	5.62493	5.77398	2.54686	5.57542	5.7643
2006	8	29	241	4.88567	4.3984	3.69661	4.45452	4.57319	2.02116	4.39056	4.61144
2006	8	30	242	5.13204	4.67323	3.92679	4.72039	4.89024	2.35676	4.81893	4.62163
2006	8	31	243	6.82729	6.12677	5.15597	6.2016	6.36785	2.81752	6.14824	6.34073
2006	9	1	244	5.06238	4.62747	3.88474	4.67308	4.84654	2.36163	4.7664	4.62163
2006	9	2	245	6.67928	6.13547	5.14893	6.18599	6.43785	3.23159	6.38095	6.16217
2006	9	3	246	5.10396	4.6541	3.90916	4.70108	4.87144	2.35423	4.77995	4.62163
2006	9	4	247	6.12605	5.58988	4.69588	5.64374	5.85392	2.85192	5.77521	5.54595
2006	9	5	248	6.24728	5.89547	4.93197	5.87907	6.21374	3.54912	6.39525	6.16217
2006	9	6	249	6.12605	5.58988	4.69588	5.64374	5.85392	2.85192	5.78642	5.54595
2006	9	7	250	4.86593	4.63556	3.87179	4.60434	4.88337	2.88683	5.07693	4.92973
2006	9	8	251	6.4435	5.94846	4.99025	5.98576	6.25169	3.23148	6.26995	6.00811
2006	9	9	252	5.34607	4.85653	4.08292	4.9065	5.07871	2.42767	5.00667	4.77568
2006	9	10	253	5.95303	5.51072	4.62595	5.53027	5.80029	3.09027	5.92593	5.54595
2006	9	11	254	5.26488	4.73997	3.98644	4.79781	4.93291	2.21279	4.75471	4.94083
2006	9	12	255	5.31693	4.90119	4.11338	4.93241	5.15027	2.65416	5.17018	4.92973
2006	9	13	256	6.38955	6.09574	5.09314	6.04153	6.42171	3.8516	6.69598	6.47028
2006	9	14	257	6.4676	6.032	5.05676	6.03989	6.35471	3.47983	6.47179	6.16217
2006	9	15	258	4.25012	4.0684	3.40051	4.0153	4.28451	2.63963	4.53444	4.31352
2006	9	16	259	4.5672	4.3665	3.65019	4.31299	4.59941	2.81825	4.86318	4.62163
2006	9	17	260	4.39533	4.38919	3.65053	4.19182	4.52144	3.33155	5.1621	4.41005
2006	9	18	261	4.52608	4.4656	3.71997	4.30686	4.64397	3.26016	5.18411	4.41005
2006	9	19	262	6.08004	5.5728	4.68126	5.61621	5.84782	2.94133	5.82189	5.54595
2006	9	20	263	5.76797	5.26147	4.41807	5.31577	5.50642	2.65402	5.37939	5.23784
2006	9	21	264	4.58968	4.17382	3.50357	4.22281	4.35934	2.03828	4.17938	4.15946
2006	9	22	265	6.78637	5.94401	5.01478	6.00103	6.08293	2.28319	5.60487	5.92899
2006	9	23	266	2.64081	2.37993	2.00273	2.40733	2.48021	1.13499	2.39908	2.47041
2006	9	24	267	3.95361	3.58798	3.01469	3.62842	3.74747	1.75733	3.61165	3.54325
2006	9	25	268	4.07618	3.57545	3.01926	3.61186	3.66902	1.42951	3.43587	3.54093
2006	9	26	269	1.47473	1.34056	1.12797	1.35263	1.40375	0.68538	1.39175	1.30946
2006	9	27	270	3.4498	3.136	2.63686	3.16696	3.28122	1.58115	3.22476	3.08108
2006	9	28	271	3.63325	3.30383	2.77915	3.33429	3.45911	1.68458	3.43451	3.23514
2006	9	29	272	3.09237	2.75251	2.3197	2.78554	2.84995	1.21322	2.72588	2.7998
2006	9	30	273	3.07599	2.79154	2.34385	2.82514	2.91315	1.34695	2.79006	2.9645
2006	10	1	274	2.94646	2.6106	2.20133	2.64118	2.69564	1.11539	2.56526	2.63511
2006	10	2	275	3.27731	2.9792	2.50502	3.00861	3.11716	1.50209	3.06503	2.92703
2006	10	3	276	3.4588	3.141	2.64138	3.17266	3.28514	1.57454	3.22791	3.08108
2006	10	4	277	2.59482	2.419	2.02849	2.42144	2.54873	1.39857	2.59855	2.46487
2006	10	5	278	3.2968	3.051	2.56002	3.06484	3.20979	1.69361	3.23009	3.08108
2006	10	6	279	3.25324	3.03151	2.54285	3.03365	3.19447	1.75651	3.26928	3.08108
2006	10	7	280	3.83437	3.53799	2.97106	3.55497	3.72119	1.95152	3.75744	3.54325
2006	10	8	281	3.4228	3.121	2.6233	3.14965	3.26929	1.601	3.22381	3.08108
2006	10	9	282	3.5488	3.191	2.68658	3.22782	3.32283	1.50838	3.22603	3.29388
2006	10	10	283	4.16222	3.77851	3.17834	3.8158	3.95244	1.8994	3.89649	3.6973
2006	10	11	284	3.39796	3.11426	2.61789	3.13522	3.27026	1.66558	3.29476	3.08108
2006	10	12	285	2.75869	2.50439	2.10514	2.53116	2.61754	1.24106	2.55037	2.46487
2006	10	13	286	3.34936	3.07549	2.5817	3.10004	3.22748	1.62409	3.18528	3.08108
2006	10	14	287	3.50452	3.16875	2.6667	3.20236	3.30909	1.55637	3.24083	3.29388
2006	10	15	288	2.9539	2.63544	2.21789	2.66866	2.72803	1.14877	2.51627	2.71745
2006	10	16	289	1.86937	1.73837	1.45745	1.74369	1.83019	0.984269	1.82412	1.77162
2006	10	17	290	3.40685	3.0185	2.54529	3.05386	3.11683	1.28968	2.92259	3.04684
2006	10	18	291	2.49015	2.28917	1.91999	2.30919	2.40136	1.1994	2.32318	2.31081
2006	10	19	292	2.1262	1.99799	1.67186	1.99779	2.10512	1.17437	2.12355	2.07973
2006	10	20	293	2.43043	2.1686	1.82624	2.19523	2.24704	0.961169	2.10003	2.22337
2006	10	21	294	1.69826	1.55438	1.30623	1.56658	1.63075	0.817877	1.60935	1.54054
2006	10	22	295	3.01983	2.74882	2.31201	2.7735	2.87911	1.4096	2.84134	2.69595
2006	10	23	296	2.79996	2.62873	2.20365	2.6195	2.77243	1.58472	2.8683	2.69595
2006	10	24	297	2.58646	2.4106	2.02053	2.41568	2.53884	1.38	2.56045	2.46487
2006	10	25	298	1.953	1.78753	1.50216	1.80156	1.87537	0.940559	1.8556	1.77162
2006	10	26	299	1.83553	1.66242	1.39907	1.67914	1.73775	0.828398	1.70537	1.61757
2006	10	27	300	1.54922	1.45509	1.21488	1.46223	1.53066	0.819331	1.43846	1.54054
2006	10	28	301	3.24897	3.02112	2.52479	3.04818	3.17184	1.6101	2.92398	3.15811
2006	10	29	302	2.41385	2.19134	1.842	2.21477	2.29034	1.08593	2.18877	2.15676
2006	10	30	303	2.04054	1.80303	1.52087	1.82363	1.85862	0.755919	1.7364	1.81164
2006	10	31	304	1.03343	0.935015	0.78535	0.946601	0.974454	0.443028	0.908144	0.988165
2007	4	1	91	1.80453	1.63654	1.37484	1.65558	1.70832	0.794431	1.59242	1.72929
2007	4	2	92	2.08651	1.89225	1.59188	1.91131	1.97855	0.945731	1.91066	1.84865
2007	4	3	93	3.06419	2.82378	2.36884	2.84427	2.96568	1.51297	2.82762	2.85
2007	4	4	94	1.96426	1.81303	1.51917	1.82814	1.90315	0.96147	1.77482	1.84865
2007	4	5	95	6.13966	5.58896	4.69423	5.64897	5.8446	2.78633	5.47364	5.54595
2007	4	6	96	2.18493	1.95981	1.6463	1.98609	2.03132	0.860887	1.82481	2.05868
2007	4	7	97	2.73046	2.4906	2.09285	2.51402	2.60859	1.27416	2.5325	2.46487
2007	4	8	98	3.34036	3.07049	2.57718	3.09402	3.22325	1.63071	3.13268	3.08108
2007	4	9	99	3.45411	3.12417	2.62479	3.16232	3.25641	1.48474	3.01585	3.29388
2007	4	10	100	3.53836	3.18049	2.67662	3.21848	3.30935	1.48517	3.1167	3.29388
2007	4	11	101	3.8031	3.44904	2.89954	3.48651	3.60336	1.69918	3.42837	3.38919
2007	4	12	102	3.95609	3.59748	3.02406	3.63377	3.76357	1.80878	3.6216	3.54325
2007	4	13	103	3.6447	3.36104	2.81999	3.38335	3.5314	1.81561	3.44743	3.38919
2007	4	14	104	3.98169	3.7001	3.10168	3.7142	3.89429	2.07865	3.83699	3.77433
2007	4	15	105	4.43607	4.04364	3.39735	4.08354	4.23304	2.05112	4.02589	4.00541
2007	4	16	106	3.19708	2.99324	2.50758	2.99338	3.15427	1.75146	3.10817	3.08108
2007	4	17	107	3.47711	3.24516	2.72093	3.24676	3.4197	1.88644	3.40939	3.31217
2007	4	18	108	2.46046	2.26384	1.89624	2.28721	2.37242	1.16332	2.16629	2.31081
2007	4	19	109	3.51229	3.32113	2.77137	3.32593	3.49618	1.93965	3.2754	3.54325
2007	4	20	110	3.27233	3.01621	2.52652	3.04485	3.16336	1.57262	2.92859	3.08108
2007	4	21	111	4.203	3.91722	3.28336	3.92547	4.12562	2.2425	4.07573	4.00541
2007	4	22	112	4.44971	4.17269	3.49415	4.17191	4.3971	2.44969	4.38575	4.31352
2007	4	23	113	3.76738	3.53937	2.96025	3.54325	3.72788	2.05991	3.68852	3.6973
2007	4	24	114	4.35561	4.28422	3.54763	4.22932	4.4809	2.81721	4.24743	3.70349
2007	4	25	115	6.44802	6.19898	5.1775	6.10492	6.52239	4.07854	6.74618	6.62433
2007	4	26	116	4.32068	4.09112	3.41946	4.07736	4.31098	2.47967	4.27843	4.31352
2007	4	27	117	3.42809	3.21221	2.68269	3.23095	3.37797	1.78797	3.23545	3.38919
2007	4	28	118	4.61653	4.27526	3.58783	4.29163	4.49936	2.39193	4.5154	4.31352
2007	4	29	119	5.06537	4.57546	3.84833	4.62788	4.77189	2.20146	4.54304	4.77613
2007	4	30	120	4.0053	3.63864	3.05471	3.68191	3.79878	1.76629	3.52242	3.62027
2007	5	1	121	3.79399	3.44657	2.89755	3.48203	3.60424	1.72286	3.49049	3.38919
2007	5	2	122	2.73882	2.499	2.10081	2.52073	2.61905	1.29273	2.57874	2.46487
2007	5	3	123	4.87445	4.5605	3.81992	4.56456	4.80467	2.64824	4.85283	4.69865
2007	5	4	124	4.50767	4.1884	3.50677	4.21408	4.40353	2.299	4.35391	4.31352
2007	5	5	125	6.07874	5.56784	4.67637	5.61425	5.83992	2.91449	5.7655	5.54595
2007	5	6	126	4.72348	4.47662	3.74409	4.45111	4.71871	2.75921	4.89502	4.69865
2007	5	7	127	5.89809	5.67792	4.73303	5.61574	5.97187	3.65137	6.24891	6.16217
2007	5	8	128	6.59216	6.09649	5.1146	6.12833	6.41142	3.35739	6.44291	6.16217
2007	5	9	129	6.47	5.79844	4.87821	5.87129	6.01875	2.61672	5.68362	6.01134
2007	5	10	130	3.02771	2.7532	2.31596	2.77857	2.88259	1.40382	2.84787	2.69595
2007	5	11	131	3.56801	3.1407	2.65101	3.17477	3.23057	1.28842	3.04823	3.12919
2007	5	12	132	1.78574	1.59474	1.34192	1.6149	1.65164	0.699531	1.53299	1.64694
2007	5	13	133	2.52146	2.25277	1.89769	2.2799	2.33741	1.01765	2.22905	2.30572
2007	5	14	134	3.0223	2.70957	2.2805	2.74278	2.8148	1.23848	2.6759	2.7998
2007	5	15	135	5.83528	5.31888	4.47191	5.3665	5.57234	2.7358	5.5099	5.23784
2007	5	16	136	4.63568	4.26612	3.57766	4.30213	4.47662	2.24814	4.38649	4.31352
2007	5	17	137	6.2434	5.56397	4.68735	5.63152	5.7631	2.45922	5.46593	5.68195
2007	5	18	138	2.26925	1.99095	1.68083	2.01126	2.04269	0.792886	1.90947	1.97633
2007	5	19	139	2.15657	1.96172	1.64974	1.98023	2.05364	0.99754	2.02659	1.92568
2007	5	20	140	4.49205	4.16983	3.48903	4.20228	4.38018	2.24562	4.2875	4.31352
2007	5	21	141	6.23557	5.63801	4.73816	5.70575	5.87753	2.68804	5.59947	5.92899
2007	5	22	142	5.94265	5.4355	4.56704	5.48105	5.6999	2.83647	5.62223	5.3919
2007	5	23	143	6.12346	5.57996	4.6861	5.63874	5.83749	2.79824	5.62614	5.54595
2007	5	24	144	3.3598	3.086	2.59166	3.10807	3.24037	1.6473	3.22092	3.08108
2007	5	25	145	4.69011	4.30954	3.61819	4.34146	4.52453	2.29461	4.50309	4.31352
2007	5	26	146	5.54503	5.02038	4.22039	5.0775	5.23979	2.43709	5.05022	5.27021
2007	5	27	147	6.22325	5.64388	4.7447	5.7052	5.89641	2.78048	5.72301	5.54595
2007	5	28	148	5.87018	5.30223	4.45338	5.36985	5.51999	2.4739	5.19562	5.5996
2007	5	29	149	5.49203	5.00601	4.20886	5.05082	5.24455	2.57487	5.18347	4.92973
2007	5	30	150	3.85637	3.59728	3.01342	3.60704	3.78773	2.05009	3.83176	3.6973
2007	5	31	151	7.5571	6.83972	5.74331	6.92577	7.12717	3.23062	6.77905	7.24654
2007	6	1	152	5.54273	5.01156	4.2117	5.07177	5.22447	2.38937	4.9986	5.27021
2007	6	2	153	5.90934	5.35202	4.50109	5.40999	5.5899	2.62887	5.447	5.5996
2007	6	3	154	5.79375	5.22306	4.39405	5.28409	5.44235	2.48328	5.24868	5.43491
2007	6	4	155	7.07816	6.36649	5.35868	6.44101	6.62855	3.00017	6.39321	6.58777
2007	6	5	156	6.2104	5.58425	4.70151	5.64869	5.81496	2.63967	5.6483	5.7643
2007	6	6	157	6.37164	5.7348	4.82771	5.80043	5.97452	2.727	5.82516	5.92899
2007	6	7	158	6.22085	5.67695	4.76212	5.74192	5.93563	2.81389	5.68245	5.70001
2007	6	8	159	7.52541	6.84802	5.75332	6.92005	7.16222	3.42377	6.95717	6.77838
2007	6	9	160	6.87254	6.00884	5.07503	6.0651	6.14996	2.33103	5.74465	5.92899
2007	6	10	161	4.18555	3.79712	3.19571	3.83302	3.97297	1.91931	3.9511	3.6973
2007	6	11	162	4.18412	3.78948	3.18025	3.8386	3.94758	1.77854	3.71891	4.03501
[truncated: 2,710 more rows]

## Sheet: Pan coefficients & z-test
MO	DAY	DOY	1998	1999	2000	2001	2002	2003	2004	2005	2006	2007	2008	2009	2010	2011	2012	2013	2014	2015	2016	2017	2018	2019	Kp-Snyder	Kp-FAO56-PM							MO	DAY	DOY	1998	1999	2000	2001	2002	2003	2004	2005	2006	2007	2008	2009	2010	2011
4	1	91	0.833919	0.879145	0.838959	0.775511	0.855165	0.82213	0.773529	0.820064	0.809441	0.859301	0.9187	0.865419	0.852731	0.722862	0.824472	0.720612	0.759761	0.838511	0.82159	0.822761	0.84184	0.90241	0.825402	0.927909							4	1	91	1.1	0.516667	0.45	0.862745	0.393939	0.933333	0.878788	1.1	1.16667	1.1	1.1	0.90625	0.5	1
4	2	92	0.8692	0.881877	0.751121	0.92941	0.904121	0.808362	0.786042	0.871362	0.935801	0.86938	0.836981	0.817989	0.848231	0.781003	0.779832	0.822402	0.757871	0.876761	0.719801	0.859301	0.84391	0.895121	0.838449	0.869866							4	2	92	0.875	0.5	1.05	0.6	1.1	0.589744	0.916667	0.733333	0.481481	0.833333	0.794118	0.75	1.15385	0.675
4	3	93	0.88441	0.90691	0.90781	0.84184	0.87802	0.826003	0.664542	0.885761	0.82888	0.82816	0.84913	0.83581	0.814301	0.813582	0.820871	0.89341	0.827131	0.883871	0.760481	0.838511	0.805121	0.899801	0.840653	0.885078							4	3	93	1	0.833333	0.615385	1.1	1.1	0.769231	0.88	0.615385	1.1	0.783784	0.84375	0.857143	1.15625	0.775
4	4	94	0.80116	0.942099	0.946779	0.87109	0.899801	0.780551	0.604064	0.8107	0.847871	0.818441	0.872981	0.85138	0.796121	0.877481	0.798651	0.854441	0.872082	0.870011	0.769481	0.83284	0.687042	0.845621	0.829577	0.892517							4	4	94	0.825	1	0.642857	1.1	0.9375	1.1	0.657895	1.1	1.16667	1.1	0.483333	0.75	0.678571	0.394737
4	5	95	0.863529	0.886029	0.940064	0.86902	0.863801	0.775871	0.706481	0.787481	0.892871	0.852731	0.876042	0.898989	0.712332	0.867941	0.701621	0.870551	0.856691	0.795222	0.742301	0.770652	0.76327	0.815832	0.823151	0.850662							4	5	95	0.9375	0.595238	1.1	0.725	1.1	1.1	0.642857	1.13333	0.611111	0.291667	0.5	0.490566	0.734375	1.1
4	6	96	0.863349	0.836261	0.888099	0.873972	0.928511	0.775783	0.778064	0.762191	0.8872	0.873972	0.815472	0.840222	0.765792	0.872261	0.723761	0.877301	0.780551	0.809981	0.721332	0.720612	0.75841	0.826362	0.817248	0.902761							4	6	96	1.1	0.861111	1.1	0.7	0.75	0.660714	0.5625	0.925	1.13043	1.08	0.75	0.9375	0.6875	0.84375
4	7	97	0.863709	0.94534	0.865691	0.850121	0.86884	0.848051	0.813669	0.80152	0.93238	0.85327	0.814213	0.838963	0.852011	0.827801	0.786941	0.841481	0.752832	0.791082	0.832301	0.839682	0.76084	0.823121	0.836539	0.881945							4	7	97	0.583333	0.466667	1.0625	1	1.1	0.75	1	1.125	0.65	0.9375	1.1	0.764706	0.367647	1.03448
4	8	98	0.861279	0.914919	0.879011	0.83716	0.883871	0.78109	0.798459	0.715573	0.908169	0.83509	0.858582	0.865691	0.828792	0.854261	0.798191	0.822402	0.791353	0.870551	0.82627	0.875862	0.83716	0.816731	0.839112	0.822579							4	8	98	0.75	1.1	0.553571	1.1	1.07407	0.925	0.75	1.09091	1.1	0.85	0.416667	0.622222	1.1	1.1
4	9	99	0.847779	0.90781	0.910871	0.893231	0.811871	0.829511	0.764564	0.762011	0.786222	0.863528	0.893231	0.8647	0.818801	0.859753	0.781542	0.831761	0.844758	0.779924	0.755441	0.808542	0.902231	0.822134	0.833646	0.839593							4	9	99	0.9375	0.625	0.533333	1.1	0.972222	0.708333	0.535714	0.693548	1.1	0.85	0.431818	0.96875	1.09091	0.83871
4	10	100	0.850209	0.917349	0.81556	0.87766	0.75877	0.83959	0.74788	0.8062	0.90259	0.88459	0.910239	0.83545	0.822582	0.849853	0.795222	0.863261	0.867761	0.836082	0.821503	0.769481	0.910511	0.825823	0.84128	0.906924							4	10	100	0.604167	0.966667	1.1	0.84375	1.1	0.634615	0.95	0.660714	0.652174	0.75	1	0.861111	1	0.78125
4	11	101	0.815919	0.915279	0.887919	0.843371	0.76966	0.79702	0.77713	0.76759	0.8917	0.86434	0.794051	0.84913	0.834283	0.799542	0.861011	0.836441	0.852371	0.801432	0.874511	0.721332	0.88477	0.859121	0.831724	0.889757							4	11	101	1.05714	1.03333	1.04167	0.916667	0.851064	1	0.770833	0.767857	1	0.840909	1.1	0.725	0.642857	0.651163
4	12	102	0.7837	0.979989	0.782981	0.831941	0.86695	0.7927	0.80431	0.76345	0.93445	0.86002	0.85363	0.868209	0.817275	0.761384	0.859121	0.83716	0.802871	0.721152	0.90241	0.706753	0.90295	0.852731	0.831188	0.938682							4	12	102	0.925	0.366667	1.1	1.1	1.1	1	1.08333	0.78	0.625	0.652174	0.75	0.71875	1.03846	1.03448
4	13	103	0.77713	0.89845	0.818533	0.86209	0.90313	0.85291	0.83563	0.727722	0.923739	0.82834	0.865779	0.7657	0.802511	0.791801	0.854621	0.79666	0.843011	0.769121	0.871397	0.835362	0.89359	0.771463	0.831304	0.843122							4	13	103	0.385417	1.1	0.583333	1.1	0.35	0.886364	0.75	1.04167	0.607143	0.863636	0.75	0.755556	0.791667	1.125
4	14	104	0.816459	0.890981	0.899261	0.879191	0.88981	0.91645	0.87163	0.815832	0.778481	0.81259	0.818169	0.81277	0.823301	0.795761	0.87559	0.845621	0.836981	0.778301	0.857051	0.89566	0.88927	0.769033	0.844009	0.830732							4	14	104	0.3875	1.1	0.6	0.375	1.1	0.512195	1	0.625	1.6	0.755102	0.854167	0.453125	0.642857	1.1
4	15	105	0.845349	0.87856	0.928419	0.843551	0.85741	0.95056	0.832121	0.845261	0.803503	0.85309	0.76759	0.873972	0.80791	0.790722	0.84859	0.829511	0.794051	0.780551	0.921941	0.9322	0.81241	0.843283	0.847298	0.814525							4	15	105	0.35	1.1	0.644444	0.8	0.806452	1.08333	0.853659	0.8	1.0625	0.35	1	0.605263	0.672414	0.875
4	16	106	0.821115	0.871989	0.901814	0.877121	0.89827	0.90088	0.718182	0.910691	0.908981	0.79927	0.879191	0.89827	0.727542	0.834191	0.847332	0.860652	0.816191	0.732402	0.863801	0.886481	0.708731	0.911051	0.844279	0.946186							4	16	106	1.1	1.1	0.875	1.1	1.11765	1.1	0.75	0.619048	1.1	0.675	0.464286	0.571429	1.0625	0.738095
4	17	107	0.917441	0.872529	0.76327	0.856871	0.831941	0.88477	0.72466	0.88738	0.903761	0.80863	0.807551	0.914739	0.786582	0.775511	0.85291	0.850121	0.743112	0.842472	0.850481	0.86434	0.77659	0.854353	0.835001	0.827246							4	17	107	0.5	0.923077	0.557143	1.1	1.1	0.588235	0.607143	0.659091	0.47619	0.44186	0.66	0.826087	0.65625	1.1
4	18	108	0.8377	0.868029	0.745902	0.845621	0.892511	0.872441	0.90502	0.899981	0.92752	0.820152	0.84256	0.82213	0.852011	0.747972	0.796121	0.872981	0.846612	0.856691	0.821231	0.840761	0.77227	0.860832	0.843048	0.897588							4	18	108	1.1	0.761905	0.833333	1	1.1	0.5	0.666667	0.708333	0.571429	1.06667	0.586957	1.1	0.616667	1.1
4	19	109	0.87334	0.90331	0.891253	0.847152	0.929231	0.818713	0.7927	0.853722	0.86938	0.763542	0.8647	0.819996	0.825371	0.835902	0.775696	0.893051	0.913121	0.876582	0.760301	0.845441	0.818801	0.846432	0.846261	0.873048							4	19	109	0.90625	0.925	0.666667	0.975	0.62069	1.13333	1.1	1.1	1.1	0.782609	1	0.72	0.826923	0.59375
4	20	110	0.854082	0.90934	0.930941	0.8602	0.868301	0.890621	0.93859	0.833472	0.894849	0.818082	0.87595	0.810996	0.797832	0.814932	0.853902	0.89116	0.818261	0.838511	0.737441	0.856871	0.897551	0.823033	0.855224	0.849498							4	20	110	1	0.644444	0.454545	1.1	1.1	0.525	0.7	0.825	0.833333	0.775	0.589286	1.09375	0.732143	1.1
4	21	111	0.807011	0.889989	0.951279	0.851739	0.8827	0.894582	0.928599	0.83095	0.90466	0.80827	0.87595	0.80652	0.880542	0.814301	0.868301	0.879371	0.845261	0.858222	0.768941	0.86866	0.82141	0.716296	0.852434	0.8782							4	21	111	1.1	0.789474	1.1	1.02564	1.1	1.1	0.382353	1.05882	0.8125	0.596154	0.645833	0.791667	0.534483	1.1
4	22	112	0.83545	0.81934	0.967029	0.775691	0.93841	0.87127	0.87163	0.899261	0.8872	0.79459	0.876669	0.83356	0.836082	0.92716	0.854441	0.859301	0.849941	0.782174	0.662292	0.775511	0.736362	0.693437	0.833946	0.906996							4	22	112	0.658537	1.1	1.1	1.125	0.933333	1.29167	1.1	0.372093	0.6	0.642857	0.484848	0.461538	1.15625	0.35
4	23	113	0.820239	0.842919	0.940209	0.825643	0.94345	0.88288	0.886481	0.861731	0.793332	0.784871	0.836349	0.865871	0.782082	0.890621	0.803231	0.852731	0.852371	0.778033	0.706121	0.759314	0.825191	0.713327	0.829409	0.900465							4	23	113	0.775	0.666667	1.1	0.938776	1.1	0.527778	0.742857	1.1	1.1	0.854167	0.85	0.507246	0.846154	1.1
4	24	114	0.779739	0.820599	0.944529	0.801792	0.91816	0.790902	0.86641	0.834551	0.94291	0.680564	0.75634	0.883871	0.766511	0.877301	0.827441	0.814301	0.798551	0.786761	0.76516	0.734472	0.82834	0.764174	0.817426	0.912394							4	24	114	0.864865	0.62069	1.1	0.88	1.1	1.1	1.07407	1.1	0.35	0.75	0.785714	0.566667	0.71875	1.1
4	25	115	0.825279	0.772989	0.919779	0.816011	0.88009	0.935441	0.878919	0.875231	0.693612	0.74977	0.856239	0.876761	0.773621	0.832121	0.813941	0.757332	0.734472	0.800981	0.758909	0.791981	0.732761	0.760033	0.81074	0.830703							4	25	115	0.6	1.1	1.1	1.04651	1.1	0.25641	0.775	0.698113	1.1	0.395349	0.3375	0.770833	0.65625	1.1
4	26	116	0.897463	0.799989	0.910959	0.843371	0.877301	0.872981	0.80359	0.86191	0.646003	0.771551	0.83095	0.88702	0.752472	0.840941	0.849761	0.741941	0.810253	0.748332	0.813582	0.762731	0.711972	0.788652	0.810169	0.867773							4	26	116	0.541667	0.84	1.1	0.633333	1.1	1.1	1.1	0.770833	0.764706	0.553571	0.622951	0.813953	0.772727	1.1
4	27	117	0.97081	0.84859	0.817989	0.84859	0.84427	0.750222	0.761744	0.890801	0.762731	0.779112	0.868481	0.88063	0.820691	0.798191	0.825551	0.737261	0.845261	0.767051	0.808722	0.701082	0.85984	0.793871	0.817341	0.859806							4	27	117	1.1	0.714286	1.1	0.796296	1.1	1.1	0.722222	0.607143	0.625	1	0.645833	1.05556	0.689655	1.1
4	28	118	0.923739	0.85363	0.93031	0.708371	0.84616	0.80359	0.81952	0.89602	0.85345	0.82438	0.85759	0.85741	0.836893	0.772182	0.787301	0.710155	0.852011	0.746621	0.856332	0.716832	0.886301	0.762643	0.822793	0.790871							4	28	118	1.1	0.7	0.35	1.1	1.1	0.714286	0.4875	0.765957	0.7	0.607143	0.6	0.649123	0.595745	0.765957
4	29	119	0.879279	0.88756	0.923919	0.732761	0.87784	0.86416	0.75184	0.83995	0.754542	0.87334	0.82591	0.87181	0.858402	0.837253	0.775871	0.721871	0.816643	0.76309	0.845621	0.798551	0.86659	0.759042	0.823902	0.786832							4	29	119	0.78125	0.66	0.560976	1	0.6875	0.54	0.785714	0.770833	0.931818	0.448276	0.484375	0.474576	1.125	1.06667
4	30	120	0.883599	0.858489	0.906099	0.714761	0.87127	0.84706	0.87559	0.901871	0.871542	0.852191	0.8467	0.89566	0.899801	0.847332	0.775871	0.728621	0.824652	0.840222	0.857051	0.80791	0.84877	0.754542	0.841346	0.758158							4	30	120	1.1	0.597222	1.1	0.725	1	0.787234	0.40625	0.520833	0.645833	0.744681	0.371429	0.534483	0.522727	1.1
5	1	121	0.883779	0.838599	0.897279	0.800893	0.85777	0.75859	0.85552	0.925722	0.874511	0.86227	0.85291	0.90691	0.89341	0.872082	0.771551	0.758051	0.818261	0.828972	0.768582	0.774972	0.757152	0.819073	0.835312	0.90516							5	1	121	1.06667	0.703704	1.1	0.625	0.888889	0.895833	1.1	0.965517	0.85	0.704545	0.603774	0.681818	1.1	1.03125
5	2	122	0.795669	0.825099	0.899709	0.673182	0.89827	0.688121	0.811691	0.82888	0.87091	0.85588	0.8872	0.845621	0.863082	0.839682	0.863801	0.708371	0.815652	0.844902	0.831582	0.839051	0.779652	0.790362	0.820744	0.854409							5	2	122	1.1	0.911111	0.837209	1.1	0.525	0.777778	0.925	0.945946	0.553571	1.0625	0.5	0.770833	1.1	1.1
5	3	123	0.786849	0.8692	0.886029	0.78541	0.86434	0.73438	0.94516	0.78091	0.86452	0.79909	0.87766	0.844989	0.849042	0.856511	0.902051	0.766871	0.843551	0.881801	0.851832	0.875051	0.729792	0.819792	0.837038	0.735723							5	3	123	0.708333	0.535714	0.925	0.356436	0.970588	0.684211	0.5625	0.629032	0.85	0.672131	0.517857	0.625	0.84	0.886364
5	4	124	0.76795	0.849489	0.859301	0.803051	0.872981	0.73195	0.90484	0.756432	0.83302	0.804941	0.83527	0.853362	0.856511	0.845441	0.935877	0.811871	0.818981	0.830231	0.795853	0.861551	0.737441	0.802424	0.825853	0.907655							5	4	124	1.1	1.125	1.1	0.978261	0.75	0.606742	1.06667	0.696429	0.755102	0.803571	0.68	0.595745	0.909091	1.0625
5	5	125	0.76741	0.815919	0.922481	0.8197	0.859301	0.75427	0.88927	0.79234	0.839231	0.84427	0.88459	0.813766	0.854261	0.860832	0.888371	0.816191	0.713862	0.800621	0.853542	0.877301	0.845261	0.814121	0.833041	0.821132							5	5	125	0.732143	0.955556	0.45	1.1	0.785714	0.8125	1.1	1.025	0.666667	0.541667	0.55102	1.17647	0.745098	0.9
5	6	126	0.849849	0.808989	0.957849	0.82816	0.79459	0.76777	0.860919	0.91816	0.85516	0.77434	0.85534	0.940481	0.861371	0.863441	0.872801	0.809504	0.85966	0.791621	0.881801	0.883152	0.870371	0.708463	0.846082	0.774759							5	6	126	0.535714	0.5625	1.3125	0.725	0.979167	0.736111	0.75	0.365385	0.75	0.721311	0.6	0.35	1.1	0.45
5	7	127	0.841029	0.897191	0.917709	0.869472	0.79459	0.612073	0.84895	0.880989	0.83284	0.737261	0.76102	0.90241	0.863441	0.861731	0.852551	0.809441	0.84166	0.764981	0.858761	0.850033	0.890981	0.784424	0.830615	0.818628							5	7	127	0.575	0.4375	1.1	0.880952	0.678571	0.875	0.785714	1.1	0.8125	0.6125	0.708333	1.1	0.625	1.1
5	8	128	0.804489	0.81052	0.863529	0.93841	0.78541	0.664542	0.893051	0.85309	0.835722	0.82402	0.94309	0.87838	0.861371	0.800801	0.845801	0.822941	0.901871	0.749682	0.85966	0.876402	0.884231	0.766783	0.839264	0.779543							5	8	128	1.1	1.02222	1.1	0.552632	0.609375	0.690722	0.58	0.645833	0.555556	0.5	0.35	1.1	0.552632	1.1
5	9	129	0.78388	0.9007	0.854349	0.926621	0.767231	0.690191	0.88252	0.863441	0.812051	0.886301	0.89395	0.85831	0.88216	0.820871	0.81466	0.840941	0.890261	0.83041	0.81259	0.86191	0.886481	0.786222	0.843002	0.885284							5	9	129	0.571429	0.8125	1.1	1.16667	1.09302	1.1	0.6875	0.825	0.875	0.356164	1.1	0.777778	0.714286	1
5	10	130	0.84634	0.87163	0.771279	0.926169	0.75184	0.686231	0.756432	0.8602	0.83959	0.86506	0.822761	0.83077	0.782441	0.814121	0.781182	0.834731	0.857231	0.811511	0.785231	0.758862	0.88927	0.808722	0.815982	0.852138							5	10	130	0.9	0.5375	0.803571	1	0.785714	0.725	1	0.7	0.729167	0.657143	0.925	1.1	1.1	0.923077
5	11	131	0.90052	0.842739	0.809529	0.97684	0.76066	0.70441	0.872533	0.7792	0.85759	0.93895	0.84859	0.83977	0.772542	0.836082	0.804941	0.874511	0.848231	0.852551	0.867941	0.853722	0.845801	0.827261	0.841587	0.750169							5	11	131	1.14815	0.716667	0.716667	0.952381	0.640625	0.636364	0.402778	0.803571	0.875	0.35	0.645833	0.573529	0.7	0.766667
5	12	132	0.832481	0.822849	0.820959	0.87091	0.85525	0.7297	0.890801	0.77713	0.80152	0.892871	0.85606	0.82177	0.826902	0.797652	0.861011	0.886481	0.849941	0.811871	0.854261	0.839051	0.870551	0.769932	0.833634	0.857878							5	12	132	1	0.716667	1.075	0.928571	0.45	0.611765	0.9	0.767857	0.666667	1.05	0.553571	0.611111	0.541667	0.866667
5	13	133	0.90484	0.879551	0.890349	0.837253	0.87766	0.74113	0.854261	0.852731	0.86659	0.90052	0.80431	0.813669	0.847332	0.865511	0.832301	0.836261	0.858582	0.841121	0.865511	0.829871	0.845261	0.736003	0.844574	0.858547							5	13	133	1.1	0.7	0.681818	1.1	1.12903	0.708333	0.8125	0.444444	0.696429	1	0.857143	0.611111	0.720588	0.756098
5	14	134	0.92131	0.91159	0.890349	0.841393	0.89791	0.796121	0.832481	0.81052	0.78334	0.88891	0.8602	0.7792	0.850121	0.870371	0.847871	0.845801	0.860652	0.83941	0.85291	0.838511	0.843191	0.722323	0.844749	0.843144							5	14	134	1.1	0.458824	0.775862	1.07692	0.75	0.675	0.59375	0.839286	0.632353	1.02941	0.546875	0.661765	0.839286	1.1
5	15	135	0.90313	0.880989	0.917709	0.926801	0.87127	0.86434	0.893231	0.76984	0.73816	0.85813	0.850481	0.79702	0.85966	0.848051	0.854261	0.836621	0.870731	0.822222	0.83491	0.816371	0.870731	0.717643	0.845559	0.826279							5	15	135	1.1	0.683333	0.822222	0.688889	0.882353	0.642857	0.666667	0.625	0.642857	0.573529	0.589286	0.625	0.5	1.1
5	16	136	0.896893	0.896919	0.906099	0.91402	0.82591	0.85084	0.8242	0.88927	0.852371	0.827801	0.892871	0.84634	0.87163	0.816731	0.842472	0.845441	0.852731	0.857231	0.830051	0.825551	0.834731	0.699463	0.84998	0.856515							5	16	136	1.1	0.733333	0.925	0.923077	1.1	0.941176	0.637931	0.642857	0.420455	0.696429	0.535714	0.625	0.366667	1.1
5	17	137	0.897099	0.90538	0.97306	0.80827	0.82231	0.75706	0.91231	0.8197	0.949481	0.90484	0.90763	0.81277	0.845981	0.725292	0.830231	0.865871	0.856332	0.82438	0.849402	0.776231	0.787301	0.771463	0.845563	0.813382							5	17	137	1	0.733333	0.545455	1.1	1.08333	0.71875	0.479167	0.916667	0.303571	0.347826	0.618182	0.722222	1.08889	1.1
5	18	138	0.87766	0.874239	0.867849	0.77677	0.896652	0.75427	0.819972	0.73402	0.88027	0.94552	0.88963	0.80431	0.834371	0.738432	0.784152	0.863621	0.803862	0.79027	0.819612	0.78109	0.744551	0.767415	0.820388	0.779761							5	18	138	0.5	0.716667	1.1	1.04	0.375	0.883333	1.11429	0.666667	0.785714	0.833333	0.735849	0.47	0.9	0.625
5	19	139	0.90259	0.83131	0.88495	0.76102	0.88252	0.82609	0.86209	0.80359	0.83545	0.86263	0.91888	0.798551	0.831941	0.831222	0.816011	0.861371	0.838332	0.718902	0.835902	0.811332	0.733301	0.827261	0.830693	0.869613							5	19	139	1.1	0.793103	1	1.06	1.1	0.6625	0.673077	0.602564	0.732143	1.1	0.655172	0.641026	0.5625	0.68254
5	20	140	0.896472	0.618103	0.901599	0.76534	0.89566	0.83077	0.78316	0.79477	0.87559	0.802152	0.905919	0.86866	0.84166	0.786402	0.820152	0.827621	0.833832	0.742932	0.831582	0.896472	0.77416	0.852011	0.824774	0.768444							5	20	140	0.827586	0.663462	0.596491	0.87037	0.785714	1	1.09302	0.638889	0.84	0.910714	0.53125	0.45	0.733333	1.1
5	21	141	0.881981	0.730239	0.904029	0.77227	0.857051	0.88216	0.76552	0.84202	0.881801	0.866051	0.88756	0.861731	0.834551	0.819792	0.863261	0.825191	0.834011	0.809621	0.861551	0.861191	0.78784	0.836082	0.839341	0.73818							5	21	141	0.734694	0.438776	0.909091	0.916667	0.735849	0.71875	0.6875	0.65625	0.616667	0.5	0.803571	0.958333	0.625	0.6875
5	22	142	0.92959	0.773349	0.899529	0.74545	0.854981	0.875051	0.86452	0.845981	0.88702	0.84895	0.90952	0.8872	0.798011	0.811691	0.847691	0.840761	0.800441	0.833112	0.841481	0.897551	0.850301	0.775783	0.846271	0.757685							5	22	142	0.9	0.733333	0.88	0.6375	0.955556	0.738462	0.583333	0.903846	0.769231	0.571429	0.597222	0.475	0.75	1.01923
5	23	143	0.924279	0.79981	0.905919	0.76363	0.888191	0.825731	0.866051	0.868121	0.87802	0.850481	0.883691	0.86641	0.828612	0.789371	0.847152	0.830051	0.782621	0.846253	0.835542	0.872441	0.764441	0.816551	0.842426	0.717349							5	23	143	1.1	0.676471	0.275	0.581395	0.4	0.597561	0.807692	0.666667	0.655738	0.541667	0.555556	0.688525	0.767857	1
5	24	144	0.877209	0.8467	0.899169	0.735191	0.83941	0.83563	0.83959	0.85516	0.76327	0.83995	0.90241	0.888731	0.813582	0.791621	0.823033	0.84166	0.806652	0.870551	0.826722	0.863261	0.874332	0.715393	0.834056	0.782728							5	24	144	0.857143	0.555556	1.1	0.819444	1.09756	0.6125	0.5125	0.655172	0.941176	1.05	0.525641	0.5	0.65	1.14583
5	25	145	0.863529	0.857862	0.88531	0.614862	0.83734	0.807011	0.83977	0.870731	0.70009	0.83752	0.92041	0.866231	0.818441	0.807011	0.830323	0.775332	0.815652	0.844902	0.826182	0.863981	0.867222	0.752025	0.822806	0.831865							5	25	145	1.11429	0.6375	1.025	0.471429	0.844828	0.794118	0.895833	0.75	0.652778	0.785714	0.388889	1.1	1.1	1.14583
5	26	146	0.836564	0.94966	0.834279	0.7657	0.77002	0.813761	0.82609	0.87091	0.868481	0.86641	0.89359	0.803051	0.8242	0.822402	0.833472	0.836082	0.856871	0.825643	0.845261	0.832121	0.820511	0.822582	0.837166	0.730991							5	26	146	0.729167	0.342857	0.8	0.416667	0.928571	0.652778	0.611111	0.75	0.571429	0.609375	0.569444	0.684211	1.125	0.791045
5	27	147	0.800529	0.809169	0.825099	0.7747	0.83716	0.83716	0.85516	0.777582	0.867761	0.86434	0.88702	0.710441	0.766691	0.851832	0.847691	0.856511	0.874871	0.836621	0.827621	0.860832	0.80845	0.748783	0.82391	0.688312							5	27	147	0.625	1.1	0.626667	0.485981	0.465909	0.6125	0.767857	0.875	0.54878	0.569444	0.546875	0.639535	0.69697	0.525
5	28	148	0.85777	0.773349	0.827349	0.77434	0.854621	0.861731	0.85795	0.861191	0.866051	0.863261	0.83752	0.721691	0.841301	0.860652	0.857051	0.836082	0.832301	0.822402	0.872801	0.829871	0.789731	0.734112	0.828779	0.76193							5	28	148	0.816327	0.48	0.833333	0.722222	0.65625	0.57971	0.758621	0.678571	0.597222	0.602941	0.733333	0.695122	0.783333	0.5
5	29	149	0.89827	0.87145	0.895029	0.789371	0.86416	0.87631	0.86641	0.877121	0.8062	0.85813	0.87766	0.721871	0.857231	0.849761	0.804941	0.838871	0.845261	0.809533	0.868481	0.856871	0.804941	0.725924	0.839264	0.775264							5	29	149	1.025	0.366667	0.875	0.564356	0.975	0.55	0.609375	0.673913	0.767857	0.59375	0.5375	0.57	0.686567	1.1
5	30	150	0.9007	0.884051	0.885849	0.843551	0.834371	0.877213	0.84634	0.929231	0.85345	0.80341	0.706481	0.76966	0.828972	0.843551	0.787753	0.778121	0.856871	0.881801	0.890441	0.834011	0.881801	0.749682	0.839423	0.753812							5	30	150	0.9	0.48913	0.585714	1.1	0.895833	0.6	0.55	0.627907	0.785714	0.958333	0.625	0.490909	0.78125	0.705882
5	31	151	0.925989	0.88963	0.858669	0.84409	0.832121	0.920051	0.901419	0.97252	0.80791	0.858761	0.74977	0.77866	0.809801	0.841301	0.829152	0.795582	0.857103	0.85795	0.876941	0.865332	0.87559	0.792612	0.851862	0.700487							5	31	151	0.5	0.6125	0.753846	1.1	0.5375	0.615385	0.53125	0.862069	0.666667	0.477273	0.511364	0.6125	0.625	0.716216
6	1	152	0.914739	0.89656	0.822849	0.7252	0.906731	0.87541	0.843191	0.92581	0.886481	0.866051	0.84895	0.814481	0.795849	0.825011	0.834011	0.844722	0.847152	0.789371	0.886301	0.859481	0.859301	0.772003	0.847257	0.774004							6	1	152	0.904762	0.383333	0.9	1.1	0.535714	1.1	0.791667	0.35	0.4875	0.625	0.444444	0.613636	0.608108	0.694444
6	2	153	0.912489	0.86938	0.870279	0.70702	0.81259	0.89584	0.88441	0.8962	0.84391	0.86902	0.90241	0.798731	0.809261	0.835362	0.814121	0.852551	0.847032	0.808722	0.879371	0.861371	0.86866	0.824292	0.848319	0.737889							6	2	153	0.642857	0.555556	0.913793	0.613636	0.977778	0.833333	0.770833	0.791667	0.597222	0.544118	0.443182	0.777778	0.655556	0.511364
6	3	154	0.908349	0.86416	0.8557	0.81934	0.76309	0.85327	0.872621	0.87613	0.8602	0.87784	0.90484	0.84409	0.851832	0.829332	0.780551	0.831222	0.820511	0.861011	0.93445	0.859301	0.863981	0.849402	0.853692	0.796476							6	3	154	0.875	0.85	0.8	0.814286	0.910714	0.933333	0.640625	0.931818	0.583333	0.621212	0.506024	0.6125	0.5375	0.613333
6	4	155	0.88306	0.89188	0.874779	0.86209	0.80359	0.85345	0.86002	0.88945	0.8782	0.88477	0.91591	0.865871	0.829511	0.852191	0.859301	0.819972	0.805301	0.855792	0.856511	0.857051	0.868481	0.844362	0.859616	0.681514							6	4	155	1.1	0.489583	0.733333	0.6625	0.477273	0.821429	0.671875	0.736842	0.611111	0.4125	0.45	0.552083	0.569767	0.631579
6	5	156	0.789891	0.875231	0.892599	0.852011	0.859481	0.780551	0.83581	0.854981	0.89377	0.8872	0.88945	0.851472	0.856152	0.847511	0.789278	0.806292	0.768853	0.863441	0.849761	0.872621	0.867582	0.819792	0.845624	0.745815							6	5	156	1.1	0.544444	0.98	0.666667	0.486111	1	0.45	0.821429	0.55	0.6	0.575	0.556818	0.71875	0.765625
6	6	157	0.890169	0.89827	0.89206	0.807823	0.825731	0.66166	0.86002	0.841121	0.865332	0.88495	0.90241	0.832121	0.854082	0.824652	0.789278	0.831402	0.906011	0.871902	0.863082	0.849402	0.834731	0.795222	0.84461	0.740936							6	6	157	0.82	0.361538	0.866667	1.08	0.824561	0.681818	0.71875	0.611111	0.703125	0.583333	0.5	0.728571	0.541667	0.725
6	7	158	0.889989	0.91213	0.8962	0.78766	0.80152	0.71395	0.827981	0.80827	0.871902	0.840655	0.922301	0.823481	0.819073	0.843011	0.792253	0.786222	0.885941	0.858941	0.862722	0.870551	0.81916	0.779112	0.836956	0.746649							6	7	158	0.75	0.443478	0.671875	1.1	0.8125	0.611111	0.652778	0.626667	0.611111	0.72973	0.46988	0.520833	0.734375	0.848485
6	8	159	0.904029	0.8962	0.894489	0.839231	0.763989	0.90727	0.858761	0.870731	0.865332	0.85516	0.911051	0.78316	0.831582	0.840582	0.762191	0.836801	0.859301	0.845621	0.852731	0.823301	0.76741	0.743112	0.841456	0.708193							6	8	159	0.866667	0.532609	0.657895	0.6375	0.666667	0.241667	0.512821	0.803279	0.5375	0.454545	0.458333	0.654762	0.958333	0.654762
6	9	160	0.901599	0.90745	0.80863	0.81466	0.72952	0.881981	0.83041	0.863981	0.795941	0.95452	0.90052	0.77002	0.835902	0.844722	0.798371	0.766511	0.861731	0.815112	0.857051	0.827441	0.838691	0.772542	0.835332	0.743919							6	9	160	0.472222	0.342857	0.933333	0.791667	0.981481	0.35	0.821429	0.5625	0.625	0.361111	0.512821	0.579545	0.8125	0.785714
6	10	161	0.910599	0.90331	0.820419	0.77641	0.7252	0.90502	0.79684	0.88891	0.78766	0.871989	0.924551	0.77209	0.844542	0.836082	0.805121	0.831402	0.863441	0.829783	0.858582	0.849042	0.862362	0.813314	0.839849	0.753833							6	10	161	0.975	0.444444	0.35	1.03333	0.568182	0.672131	0.892857	0.5	0.703125	0.708333	0.352273	0.647059	0.816667	0.784314
6	11	162	0.935529	0.90088	0.802419	0.75634	0.824652	0.893231	0.79891	0.875051	0.787121	0.853902	0.85795	0.88009	0.811691	0.808362	0.842472	0.829511	0.860472	0.846792	0.867402	0.826722	0.857862	0.814753	0.842369	0.754029							6	11	162	0.75	0.352941	0.6625	0.64	0.590909	0.758621	0.625	1.05263	0.597222	0.816327	0.895833	0.380952	0.828125	0.683333
6	12	163	0.917529	0.8782	0.845709	0.73402	0.829332	0.87352	0.83752	0.861011	0.81916	0.866231	0.812231	0.886121	0.760121	0.858042	0.849582	0.827261	0.853722	0.835902	0.88666	0.856511	0.847332	0.831582	0.843968	0.744294							6	12	163	0.516667	0.522222	0.742857	0.764706	0.703125	0.84	0.6125	0.8125	0.594595	0.488095	0.652778	0.6875	0.828125	0.395349
6	13	164	0.912849	0.868481	0.616301	0.7477	0.83941	0.86695	0.85102	0.879731	0.856691	0.85552	0.85327	0.881981	0.791082	0.872082	0.847691	0.847332	0.836441	0.852011	0.87766	0.863082	0.874511	0.849761	0.842798	0.727806							6	13	164	0.9375	0.424528	0.66	0.6	0.451923	0.910714	0.765625	0.767857	0.475	0.916667	0.477778	0.7	0.583333	0.666667
6	14	165	0.894489	0.99313	0.616753	0.80377	0.81934	0.86209	0.87109	0.83734	0.849941	0.88027	0.906551	0.893231	0.830503	0.858582	0.849941	0.822582	0.820511	0.856332	0.859301	0.890441	0.897731	0.841393	0.852514	0.765							6	14	165	0.625	0.300971	0.686441	0.670588	0.8125	0.948276	0.666667	0.830508	0.625	0.767857	0.5	0.632353	0.625	1.1
6	15	166	0.91006	0.901419	0.70216	0.829871	0.852731	0.86866	0.843731	0.877481	0.82366	0.87802	0.913481	0.86884	0.833112	0.856691	0.81709	0.822222	0.858582	0.837792	0.825371	0.870371	0.881621	0.828073	0.850047	0.788429							6	15	166	0.733333	0.9	0.507812	0.637363	0.928571	0.861538	0.694444	0.696429	0.671875	0.77193	0.482353	1	0.821429	0.741935
6	16	167	0.894849	0.881169	0.739779	0.854621	0.854801	0.87541	0.872621	0.85291	0.86416	0.88477	0.881082	0.74266	0.822042	0.849941	0.809901	0.831222	0.844902	0.845261	0.861011	0.857051	0.84166	0.848862	0.84594	0.738155							6	16	167	0.640625	0.8	0.35	0.488636	0.5	0.675	0.638889	0.734375	0.636364	0.436782	0.478261	0.675	0.890625	0.6125
6	17	168	0.879459	0.860739	0.868209	0.696222	0.872261	0.875231	0.852191	0.798731	0.85552	0.88234	0.90916	0.773981	0.768402	0.858582	0.805401	0.808722	0.847511	0.838332	0.771103	0.836261	0.870191	0.858402	0.83577	0.777296							6	17	168	0.525	0.722222	0.5875	1.1	0.71875	0.535714	0.638889	0.675676	0.611111	0.660714	0.535714	0.659091	0.957143	0.928571
6	18	169	0.899529	0.8692	0.90727	0.83041	0.843191	0.861731	0.86866	0.88666	0.830231	0.88945	0.85291	0.870731	0.804402	0.837659	0.725112	0.784332	0.852011	0.853722	0.652033	0.867402	0.890801	0.886121	0.843799	0.718831							6	18	169	0.541667	0.55	0.531915	0.666667	1.08333	0.6625	0.734375	0.666667	0.75	0.546875	0.694444	0.6375	0.704545	0.828125
6	19	170	0.897459	0.88945	0.751481	0.857231	0.628182	0.86659	0.88684	0.890082	0.81052	0.88477	0.742121	0.800981	0.837792	0.854082	0.798011	0.653025	0.835902	0.819073	0.715121	0.864432	0.874691	0.861551	0.819063	0.765461							6	19	170	1.05	0.495238	0.814286	0.7375	0.784091	0.743243	0.555556	0.628571	0.618421	0.733333	0.482759	0.625	0.613636	0.6
6	20	171	0.919599	0.8692	0.690191	0.86641	0.671652	0.870371	0.847511	0.883332	0.84184	0.85291	0.85534	0.872981	0.838152	0.831761	0.829332	0.685152	0.826003	0.826362	0.737801	0.794503	0.865511	0.881441	0.825334	0.673799							6	20	171	0.571429	0.54	0.491667	0.7	0.753086	0.609756	0.942308	0.576923	0.734375	0.575	0.48	0.490385	0.55	0.678571
6	21	172	0.89656	0.88513	0.798279	0.832481	0.671924	0.888371	0.88216	0.888371	0.848051	0.76741	0.87595	0.888191	0.840582	0.829511	0.792792	0.737261	0.830503	0.840222	0.829871	0.843011	0.853902	0.855972	0.835296	0.705481							6	21	172	0.95	0.510204	0.6125	0.805556	0.633333	0.692308	0.597222	0.527778	0.534091	0.6625	0.362903	0.593023	1.1	0.847222
6	22	173	0.88441	0.90052	0.818349	0.804222	0.85552	0.883691	0.88234	0.847871	0.87316	0.742301	0.83806	0.903941	0.807011	0.802691	0.819972	0.757871	0.847332	0.842832	0.831761	0.805301	0.855972	0.874871	0.84	0.697045							6	22	173	0.732143	0.47	0.6	0.688889	0.8125	0.676923	0.672131	0.680556	0.583333	0.491071	0.383333	0.5875	0.717949	0.984615
6	23	174	0.874239	0.861011	0.831489	0.854981	0.848051	0.85534	0.861731	0.685871	0.876941	0.80395	0.705042	0.91402	0.788564	0.793691	0.824652	0.795582	0.820511	0.835542	0.856691	0.848051	0.863441	0.844362	0.829262	0.717192							6	23	174	0.55	0.49	0.454545	0.626506	0.7125	0.8	0.5125	0.875	0.59375	0.662338	0.566667	0.833333	0.625	0.694737
6	24	175	0.834099	0.879731	0.836349	0.87316	0.85984	0.83266	0.86434	0.79684	0.888731	0.76102	0.76966	0.87316	0.760932	0.813941	0.833832	0.761652	0.813582	0.830862	0.851832	0.836441	0.874691	0.828073	0.830701	0.694349							6	24	175	0.86	0.419048	0.544444	0.589474	0.650602	0.7125	0.737705	0.614458	0.647059	0.480769	0.509615	0.84375	0.75	0.590476
6	25	176	0.910599	0.877301	0.878919	0.852371	0.879731	0.71827	0.88009	0.866051	0.89116	0.8287	0.86245	0.86416	0.817542	0.817758	0.843011	0.842832	0.811332	0.840402	0.849761	0.827441	0.849761	0.839682	0.847697	0.713418							6	25	176	0.55	0.544444	0.675	0.6875	0.625	0.835616	0.6875	0.694444	0.506329	0.471154	0.384615	0.714286	0.98	0.775
6	26	177	0.88081	0.85759	0.905739	0.866051	0.88216	0.85516	0.87109	0.861371	0.902051	0.735191	0.86209	0.883332	0.826362	0.816639	0.811332	0.840402	0.815832	0.817362	0.858222	0.852371	0.888371	0.842472	0.851455	0.701457							6	26	177	0.611111	0.456522	0.6625	0.642857	0.640625	0.482143	0.857143	0.8125	0.597222	0.647727	0.490385	0.625	0.609756	0.722222
6	27	178	0.883239	0.867669	0.901239	0.88234	0.87109	0.886481	0.877481	0.830231	0.899441	0.82834	0.86641	0.853902	0.815472	0.802032	0.833292	0.847152	0.786941	0.842832	0.801432	0.845261	0.854621	0.834823	0.850533	0.721469							6	27	178	0.585714	0.6	0.577778	0.51087	0.875	0.75	0.684211	0.964286	0.573529	0.552083	0.504762	0.6625	0.590909	0.657143
6	28	179	0.838599	0.867619	0.919419	0.88909	0.870731	0.88909	0.870551	0.872981	0.885941	0.85741	0.91834	0.888551	0.831042	0.818082	0.835902	0.826722	0.769301	0.822761	0.826902	0.860472	0.863441	0.823033	0.856635	0.647736							6	28	179	0.597222	0.581081	0.75	0.54	0.6875	0.584416	0.714286	0.579545	0.626866	0.435185	0.336538	0.476744	0.65	0.788462
6	29	180	0.854529	0.88981	0.901419	0.823481	0.861551	0.87541	0.677051	0.856871	0.926981	0.87766	0.91159	0.897551	0.831761	0.813042	0.780191	0.824292	0.786941	0.822402	0.829511	0.862902	0.837972	0.788204	0.842324	0.771544							6	29	180	0.55	0.705128	0.9	1.07143	0.6375	0.8125	0.725	0.575	0.418919	0.511364	0.613333	0.479167	0.9	1
6	30	181	0.872349	0.8602	0.881529	0.75184	0.848231	0.870371	0.7297	0.861011	0.88477	0.881621	0.89152	0.88891	0.822582	0.826722	0.764621	0.835542	0.854082	0.820152	0.836261	0.847511	0.801612	0.726196	0.834424	0.769558							6	30	181	0.575	0.736111	0.607143	0.765432	0.835821	0.7	0.579545	0.65625	0.754717	0.541667	0.556818	0.910714	0.777778	0.981132
7	1	182	0.885489	0.88738	0.858849	0.847871	0.87316	0.863801	0.85795	0.885941	0.893051	0.85516	0.83266	0.881981	0.859121	0.833652	0.712511	0.776682	0.835722	0.838511	0.825011	0.772362	0.859301	0.595608	0.833263	0.693883							7	1	182	0.575	0.54	0.52	0.6625	0.568182	0.694118	0.568182	0.75	0.638889	0.661765	0.448276	0.52	0.684211	0.675
7	2	183	0.867669	0.90052	0.895029	0.874691	0.87109	0.85966	0.78577	0.886301	0.874871	0.877121	0.90709	0.897551	0.829152	0.845082	0.640603	0.777761	0.849582	0.858582	0.829152	0.735731	0.863801	0.771103	0.840814	0.693069							7	2	183	0.692308	0.479167	0.625	0.710526	0.686567	0.613636	0.701299	0.617647	0.647887	0.625	0.488636	0.613636	0.90625	0.576923
7	3	184	0.82663	0.90934	0.852099	0.883691	0.87109	0.84202	0.82141	0.867761	0.863441	0.866051	0.90916	0.899801	0.842832	0.845131	0.652753	0.798011	0.831582	0.843011	0.826362	0.838511	0.861371	0.836082	0.844916	0.668761							7	3	184	0.6125	0.458333	0.8	0.51	0.534091	0.666667	0.579545	0.895833	0.476744	0.579545	0.424528	0.5	0.818182	0.8
7	4	185	0.87163	0.90538	0.820779	0.849941	0.85741	0.89341	0.857231	0.856152	0.897191	0.877481	0.87352	0.881801	0.835902	0.835542	0.714582	0.811332	0.844722	0.842292	0.840042	0.856152	0.840941	0.840941	0.850199	0.692928							7	4	185	0.534091	0.454545	0.490909	0.609756	0.964286	0.612903	0.708333	0.71875	0.791667	0.5	0.556818	0.6	0.814286	0.734375
7	5	186	0.917801	0.8917	0.836709	0.863441	0.854981	0.881981	0.84859	0.847871	0.895481	0.867941	0.90916	0.924731	0.833652	0.840761	0.791261	0.836082	0.840222	0.855972	0.831282	0.853722	0.845082	0.823213	0.858711	0.655312							7	5	186	0.609375	0.416	0.45	0.6125	0.636364	0.791667	0.675	0.625	0.603175	0.5125	0.431373	0.352381	0.7	0.77193
7	6	187	0.937419	0.90502	0.850029	0.856332	0.84841	0.895481	0.8107	0.866051	0.88441	0.863981	0.92077	0.899981	0.837792	0.834011	0.776862	0.844722	0.810972	0.854082	0.828972	0.860112	0.836082	0.795494	0.855349	0.765681							7	6	187	0.46875	0.552083	0.728571	0.7125	0.774648	0.444444	0.743243	0.958333	1.1	0.703125	0.5	0.890909	1.1	0.595238
7	7	188	0.946959	0.86677	0.877209	0.867761	0.86416	0.88891	0.84652	0.888371	0.82852	0.870191	0.88027	0.886121	0.835182	0.840582	0.820332	0.826902	0.822222	0.842472	0.865152	0.825011	0.854082	0.788204	0.855996	0.736938							7	7	188	1.1	0.519231	0.65	0.6625	0.625	0.94	0.6625	0.703125	0.6875	0.522727	0.48	0.609756	0.6	0.671875
7	8	189	0.903669	0.890981	0.852279	0.847871	0.854441	0.877481	0.87091	0.897731	0.84409	0.841481	0.767231	0.90916	0.840222	0.854441	0.790542	0.843191	0.820152	0.835542	0.846972	0.793511	0.863261	0.793424	0.847208	0.759695							7	8	189	1.1	0.4	0.495238	0.830986	0.75	0.641975	0.6125	0.734375	0.839286	0.619048	0.435484	1.1	1.02381	0.96
7	9	190	0.88495	0.8872	0.836529	0.823481	0.852371	0.867941	0.879551	0.879731	0.85741	0.82159	0.91195	0.91159	0.833292	0.836261	0.822222	0.835902	0.840222	0.821682	0.816011	0.789011	0.860832	0.826182	0.849814	0.695459							7	9	190	0.555556	0.574468	0.481818	0.581818	0.575	0.625	0.525	0.875	0.625	0.757143	0.385246	0.555556	0.680556	1.1
7	10	191	0.867489	0.89656	0.919419	0.866231	0.843191	0.8827	0.8422	0.892871	0.886481	0.85552	0.91888	0.92077	0.834371	0.819972	0.831941	0.828792	0.835722	0.849042	0.826902	0.804761	0.854441	0.834643	0.859677	0.737591							7	10	191	0.5625	0.509091	0.51	0.682353	0.680556	0.806452	0.696203	0.857143	0.628571	0.796875	0.5625	0.534091	0.85	0.693182
7	11	192	0.883239	0.89395	0.926529	0.870551	0.863801	0.86866	0.848231	0.888551	0.895481	0.866231	0.90295	0.911231	0.827621	0.815472	0.804761	0.835542	0.847152	0.853722	0.809261	0.836082	0.849582	0.829963	0.860389	0.721957							7	11	192	0.92	0.581633	0.742857	0.791667	0.785714	0.675	0.763889	0.653333	0.525	0.489583	0.489583	0.480769	0.890625	0.763889
7	12	193	0.85381	0.89395	0.908709	0.868301	0.877481	0.870371	0.872981	0.893231	0.877301	0.872981	0.91159	0.901691	0.829152	0.831402	0.827261	0.842112	0.849402	0.846792	0.782441	0.835902	0.828612	0.835362	0.859583	0.732889							7	12	193	0.71875	0.483333	0.72	0.7	0.814815	0.675	0.78125	0.910714	0.71875	0.55	0.560976	0.647059	0.805556	0.75641
7	13	194	0.876489	0.88513	0.897279	0.863801	0.86884	0.863082	0.877481	0.886121	0.874691	0.87109	0.924191	0.883511	0.820152	0.845082	0.809621	0.842472	0.826003	0.826902	0.789191	0.838152	0.813402	0.837432	0.85546	0.747561							7	13	194	0.766667	0.57732	0.6	0.816667	0.724138	0.694444	0.892857	0.75	0.625	0.75	0.355769	0.536082	0.7	0.825397
7	14	195	0.896919	0.88477	0.919779	0.886121	0.88027	0.885941	0.881981	0.885402	0.890441	0.87316	0.908801	0.962621	0.835902	0.840582	0.822582	0.849402	0.835182	0.829381	0.849582	0.847152	0.860652	0.864432	0.872321	0.699742							7	14	195	1.1	0.55102	0.525	0.555556	0.933333	0.534091	0.641791	0.6	0.637931	0.583333	0.547619	0.364583	0.75	0.595238
7	15	196	0.878739	0.88927	0.912669	0.888551	0.87127	0.893051	0.815112	0.876402	0.888731	0.85759	0.890801	0.86002	0.840582	0.853902	0.811332	0.844902	0.831042	0.834191	0.856332	0.853902	0.844722	0.842159	0.860694	0.711751							7	15	196	0.703125	0.49	0.8	0.625	0.634146	0.6	0.982143	0.6875	0.640625	0.666667	0.571429	0.809524	0.7	0.75
7	16	197	0.905739	0.89827	0.888279	0.893051	0.87541	0.879551	0.83059	0.856511	0.89791	0.730871	0.89584	0.91366	0.809082	0.831042	0.804941	0.851292	0.806112	0.838332	0.862902	0.858941	0.833832	0.833832	0.854363	0.702154							7	16	197	0.683333	0.416667	0.5	0.714286	1.1	0.722222	0.625	0.958333	0.703125	0.636364	0.516484	0.525	0.5875	0.743243
7	17	198	0.901239	0.878919	0.894849	0.886481	0.85516	0.879551	0.80584	0.84634	0.899801	0.622516	0.897551	0.91888	0.831582	0.781722	0.832121	0.830503	0.810792	0.829405	0.858222	0.834371	0.835542	0.815292	0.843031	0.68407							7	17	198	0.557143	0.505263	0.488889	0.883333	0.647727	0.708333	0.541667	0.806452	0.625	0.643939	0.479167	0.505882	0.617284	0.928571
7	18	199	0.908529	0.92131	0.901599	0.867941	0.86209	0.861731	0.83509	0.875231	0.890981	0.683533	0.906191	0.91591	0.822222	0.824112	0.859481	0.829963	0.833652	0.818131	0.833652	0.838691	0.855432	0.888191	0.856076	0.669867							7	18	199	0.683333	0.545455	0.716667	0.53	0.696203	0.706667	0.796875	0.78125	0.734375	0.5625	0.52381	0.710145	0.818182	0.709302
7	19	200	0.904209	0.87352	0.899529	0.868301	0.879731	0.859301	0.78766	0.881981	0.886481	0.734832	0.890621	0.908981	0.835542	0.830909	0.845528	0.788472	0.817362	0.802405	0.846972	0.824652	0.830862	0.851112	0.84768	0.708519							7	19	200	0.709677	0.521277	0.671429	0.694444	0.65	0.633333	0.574468	0.764706	0.727273	0.445312	0.5	0.6125	0.7125	0.75
7	20	201	0.910779	0.89395	0.883419	0.88009	0.84391	0.83959	0.85777	0.85516	0.877121	0.84427	0.904301	0.911051	0.815112	0.824652	0.780823	0.826902	0.819792	0.829871	0.808542	0.797832	0.844902	0.819884	0.848624	0.728536							7	20	201	0.5375	0.675	0.564706	0.823529	0.828125	0.736111	0.621951	0.684211	0.78125	0.46875	0.522222	0.611765	1.1	0.659091
7	21	202	0.899709	0.86956	0.872709	0.865871	0.86902	0.88045	0.856871	0.88891	0.883511	0.881801	0.904481	0.874871	0.828432	0.824112	0.844902	0.826542	0.812682	0.838381	0.839862	0.825011	0.858761	0.784696	0.855961	0.669483							7	21	202	0.583333	1.03636	0.533333	0.725	0.625	0.6375	0.534091	0.708333	0.534091	0.411765	0.529412	0.785714	0.607143	0.72
7	22	203	0.910959	0.835989	0.883959	0.880373	0.87109	0.880989	0.84841	0.895301	0.899621	0.879731	0.920231	0.883871	0.819432	0.831222	0.781542	0.817902	0.822222	0.836155	0.795042	0.847332	0.804582	0.737538	0.84925	0.675015							7	22	203	0.6	0.55	0.49	0.588889	0.54023	0.722222	0.60241	0.734375	0.511111	0.611111	0.488636	0.590909	1.1	0.52381
7	23	204	0.899349	0.87577	0.881529	0.86677	0.877301	0.860919	0.84184	0.885941	0.906551	0.87766	0.915731	0.881981	0.821503	0.829008	0.830051	0.820152	0.840402	0.840655	0.838332	0.843011	0.855792	0.785775	0.858001	0.678472							7	23	204	0.716667	0.429825	0.75	0.625	0.680556	0.710526	0.689189	0.586667	0.5	0.625	0.445652	0.65	0.746667	0.556818
7	24	205	0.928779	0.88288	0.897459	0.87091	0.739152	0.829599	0.86659	0.876941	0.90241	0.88477	0.90934	0.90466	0.814573	0.831582	0.843011	0.813222	0.842292	0.832004	0.795222	0.824652	0.857862	0.827174	0.853413	0.681487							7	24	205	0.4	0.53	0.6125	0.6	1.1	0.568182	0.5875	0.671875	0.583333	0.71875	0.43956	0.602273	0.611111	0.647727
7	25	206	0.931029	0.90295	0.879314	0.857051	0.728801	0.881529	0.847871	0.902051	0.88459	0.87352	0.915731	0.870731	0.815292	0.836082	0.856691	0.806652	0.831042	0.80575	0.802152	0.838332	0.850753	0.831222	0.852233	0.686832							7	25	206	0.7	0.870968	0.625	0.577778	0.435115	0.631579	0.605263	0.716667	0.647059	0.638889	0.416667	0.436364	0.684211	0.694444
7	26	207	0.928419	0.921489	0.888639	0.866051	0.841301	0.867849	0.88027	0.904481	0.904481	0.88252	0.872621	0.879371	0.840222	0.834191	0.841028	0.777582	0.817542	0.822631	0.833832	0.842832	0.833472	0.762375	0.856509	0.67525							7	26	207	0.72	0.5	0.7	0.556818	0.568182	0.675676	0.538462	0.88	0.628571	0.5625	0.523256	0.602273	0.8125	0.725
7	27	208	0.910779	0.914739	0.879279	0.87316	0.84616	0.872709	0.88909	0.895301	0.890801	0.88027	0.87766	0.884231	0.835722	0.825191	0.805393	0.811511	0.828253	0.841004	0.851652	0.851652	0.820152	0.785595	0.857741	0.691759							7	27	208	0.72	0.5	0.408333	0.833333	0.5875	0.6	0.696429	0.875	0.611111	0.5625	0.456522	0.62069	0.983333	0.791667
7	28	209	0.890709	0.90484	0.888099	0.90052	0.86434	0.883419	0.89152	0.895481	0.876941	0.88288	0.91159	0.88891	0.802152	0.847511	0.824303	0.750761	0.838332	0.852254	0.851832	0.812682	0.821862	0.827533	0.859476	0.685484							7	28	209	0.466667	0.391667	0.577778	0.45977	0.828125	0.666667	0.513514	0.71875	0.55	0.703125	0.430108	0.6375	0.6875	0.625
7	29	210	0.906279	0.87838	0.895064	0.88009	0.84913	0.865779	0.86434	0.890981	0.850121	0.77695	0.91627	0.730871	0.806652	0.840941	0.816651	0.687042	0.835542	0.847381	0.843191	0.802152	0.842472	0.823753	0.838638	0.73342							7	29	210	0.7	0.671233	0.575	0.525	0.828125	0.734375	0.77193	0.803571	0.705882	0.661972	0.541667	0.436364	0.6875	0.541667
7	30	211	0.906279	0.89206	0.892814	0.91141	0.84652	0.883779	0.8872	0.899621	0.845621	0.84859	0.90952	0.872981	0.811691	0.836621	0.8125	0.762191	0.833472	0.828253	0.847152	0.807011	0.858402	0.849941	0.856529	0.671301							7	30	211	0.4625	0.5125	0.5875	0.733333	0.697368	0.576471	0.625	0.65	0.680556	0.432203	0.5	0.555556	0.796875	0.6
7	31	212	0.915459	0.89881	0.883599	0.87991	0.8242	0.917709	0.88459	0.898902	0.879731	0.886481	0.88927	0.888731	0.820511	0.831941	0.807747	0.797472	0.837972	0.835758	0.834011	0.847332	0.844722	0.860832	0.862077	0.632091							7	31	212	0.4	0.4	0.555556	0.66129	0.6625	0.608108	0.518072	0.642857	0.55	0.5125	0.44898	0.574713	0.65	0.785714
8	1	213	0.897279	0.88288	0.849849	0.865691	0.85966	0.917709	0.872981	0.908441	0.888371	0.88477	0.90052	0.886481	0.884231	0.836261	0.765612	0.833472	0.860881	0.834371	0.814481	0.897551	0.862722	0.833472	0.865349	0.625102							8	1	213	0.475	0.5625	0.49	0.588889	0.722222	0.538462	0.5	0.773585	0.458333	0.5625	0.443299	0.53125	0.392308	0.520833
8	2	214	0.910959	0.914739	0.77902	0.870731	0.824292	0.899709	0.861731	0.879551	0.902231	0.888731	0.90484	0.87316	0.815472	0.824832	0.81691	0.829332	0.853758	0.814481	0.779832	0.835722	0.860832	0.850121	0.854136	0.713448							8	2	214	0.975	0.6875	0.9	0.765625	0.763889	0.564706	0.785714	0.625	0.65625	0.617647	0.625	0.5	0.619565	0.473214
8	3	215	0.906459	0.89413	0.68452	0.87334	0.850481	0.922029	0.88216	0.86659	0.90259	0.875231	0.90727	0.868481	0.840761	0.808902	0.756432	0.813402	0.821862	0.771731	0.844722	0.842112	0.858402	0.835182	0.846672	0.661205							8	3	215	0.5	0.447917	0.415385	0.65	0.578947	0.734375	0.526316	0.705882	0.676923	0.6875	0.488636	0.5	0.765625	0.481481
8	4	216	0.890709	0.90088	0.719981	0.88441	0.87145	0.919959	0.86659	0.85309	0.9187	0.872621	0.901691	0.83266	0.849582	0.822042	0.820332	0.804402	0.833292	0.760121	0.835722	0.826722	0.855612	0.839862	0.84911	0.630157							8	4	216	0.475	0.6	0.327778	0.54878	0.704918	0.567901	0.597222	0.666667	0.602941	0.511905	0.35	0.75	0.552632	0.602273
8	5	217	0.868064	0.90295	0.825314	0.881621	0.875231	0.913209	0.87802	0.89791	0.91141	0.876941	0.897731	0.90277	0.824832	0.819073	0.816011	0.775152	0.826902	0.829511	0.860832	0.833832	0.847152	0.824112	0.858572	0.675575							8	5	217	0.557143	0.75	0.366667	0.5	0.839286	0.609375	0.714286	0.65625	0.544118	0.541667	0.447917	0.325	0.8	0.768116
8	6	218	0.827709	0.88756	0.865814	0.890801	0.848051	0.901814	0.884231	0.879191	0.879731	0.876941	0.902231	0.908801	0.817902	0.799902	0.811511	0.784332	0.818155	0.835362	0.859573	0.816011	0.851112	0.762735	0.85043	0.658337							8	6	218	0.4625	0.547619	0.321429	0.638889	0.761905	0.666667	0.57971	0.821429	0.625	0.569444	0.578947	0.369048	0.605263	0.859375
8	7	219	0.800709	0.86938	0.890709	0.87559	0.84859	0.865814	0.88909	0.852011	0.901871	0.852191	0.89584	0.913121	0.791441	0.813582	0.825371	0.831402	0.842832	0.812682	0.837612	0.821231	0.842472	0.721336	0.845222	0.667123							8	7	219	0.45	0.625	0.478723	0.772727	0.761194	0.652778	0.58209	0.615385	0.416667	0.71875	0.55	0.5	0.796875	0.725
8	8	220	0.703779	0.88531	0.897279	0.90241	0.860652	0.922029	0.886301	0.863621	0.901871	0.859481	0.90016	0.899981	0.795402	0.804402	0.760573	0.807011	0.826182	0.843191	0.817003	0.794231	0.828972	0.755805	0.84162	0.668639							8	8	220	0.3	0.738462	0.45	0.592593	0.734375	0.387755	0.696429	0.597222	0.550725	0.431818	0.446809	0.5	0.6375	0.857143
8	9	221	0.811814	0.88702	0.879279	0.87784	0.858941	0.924459	0.87784	0.893231	0.870731	0.87766	0.90916	0.89152	0.817902	0.820152	0.806832	0.804761	0.842472	0.835542	0.846792	0.849941	0.813941	0.814213	0.855093	0.672589							8	9	221	0.284615	0.46875	0.75	0.6125	0.628571	0.75	0.630769	0.821429	0.678571	0.65625	0.465909	0.4375	0.736111	0.805556
8	10	222	0.867849	0.88756	0.899709	0.86695	0.86209	0.913029	0.89566	0.895301	0.89809	0.87784	0.911231	0.773981	0.809082	0.835902	0.815832	0.815832	0.833472	0.830682	0.867402	0.863082	0.820691	0.809174	0.856838	0.635623							8	10	222	0.285714	0.7	0.666667	0.928571	0.734375	0.494505	0.521127	0.621212	0.65625	0.465909	0.421053	0.375	0.720588	0.6625
8	11	223	0.897459	0.897099	0.890709	0.88441	0.86884	0.874239	0.874332	0.884231	0.904481	0.87991	0.906731	0.749051	0.831761	0.837792	0.817902	0.849402	0.824472	0.819253	0.853182	0.829152	0.823121	0.765617	0.85287	0.692284							8	11	223	0.633333	0.546667	0.433333	0.577778	0.722222	0.652778	0.513889	0.767857	0.683333	0.6875	0.465909	0.465517	0.839286	0.71875
8	12	224	0.883779	0.88756	0.908709	0.88441	0.81484	0.883959	0.82816	0.87316	0.90241	0.89827	0.917981	0.77659	0.818082	0.809893	0.817722	0.835722	0.844722	0.835542	0.837792	0.838511	0.813761	0.802244	0.850628	0.676057							8	12	224	0.557143	0.533333	1.1	0.511111	0.7	0.569444	0.872727	0.821429	0.5125	0.474359	0.395604	0.509804	0.568182	0.796875
8	13	225	0.883814	0.89638	0.904064	0.88216	0.85741	0.874959	0.83302	0.863981	0.893231	0.87091	0.924551	0.85534	0.829511	0.779652	0.774792	0.840582	0.833832	0.833652	0.847511	0.840222	0.797832	0.851832	0.853147	0.667333							8	13	225	0.557143	0.595238	0.39	0.505747	0.6625	0.523256	1	0.666667	0.4875	0.640625	0.475	0.464286	0.657895	0.982143
8	14	226	0.856959	0.89656	0.906459	0.85966	0.862722	0.843459	0.86452	0.875231	0.897551	0.88234	0.91384	0.87091	0.836261	0.813402	0.806472	0.816011	0.843011	0.834011	0.838511	0.828972	0.840761	0.867941	0.857071	0.712442							8	14	226	0.528571	0.816667	0.84	0.544444	0.758065	0.511364	0.6	0.875	0.732143	0.428571	0.416667	0.75	0.595238	0.816667
8	15	227	0.899349	0.91231	0.841064	0.87127	0.843551	0.802959	0.875051	0.875231	0.88459	0.88927	0.91402	0.89584	0.811152	0.820332	0.817722	0.818261	0.847511	0.844722	0.856152	0.856511	0.858941	0.842292	0.858095	0.690976							8	15	227	0.514286	0.796296	0.614286	0.588235	0.619718	0.569444	0.583333	0.839286	0.66129	0.578125	0.41	0.702703	0.75	0.757576
8	16	228	0.859209	0.89881	0.814209	0.86659	0.883871	0.823209	0.861731	0.897551	0.90052	0.87334	0.88009	0.89791	0.807011	0.831582	0.791082	0.815832	0.840402	0.836621	0.854893	0.835902	0.861191	0.830862	0.852837	0.616909							8	16	228	0.433333	0.6	0.43	0.522222	0.4875	0.47619	0.540541	0.637681	0.5125	0.541667	0.346939	0.666667	0.590909	0.833333
8	17	229	0.843314	0.910419	0.892959	0.859121	0.859121	0.888459	0.87766	0.875231	0.87577	0.87991	0.89413	0.895481	0.797832	0.815472	0.789011	0.806652	0.908981	0.802511	0.843823	0.824652	0.858582	0.829963	0.855866	0.698461							8	17	229	0.366667	0.7	0.375	0.720588	1.1	0.652778	0.577465	0.732143	0.5	0.640625	0.4625	0.590909	0.577778	1
8	18	230	0.859209	0.890349	0.906459	0.843191	0.924731	0.890709	0.85516	0.870551	0.87127	0.866231	0.88756	0.90259	0.804222	0.797472	0.786582	0.808902	0.803503	0.834011	0.834191	0.842832	0.847332	0.833112	0.852735	0.677407							8	18	230	0.45	0.763636	0.44	0.551282	0.462687	0.803571	0.5375	0.6875	0.583333	0.716667	0.475	0.736111	0.613636	0.791667
8	19	231	0.923919	0.865599	0.903849	0.87559	0.88063	0.868064	0.88909	0.877481	0.89566	0.870731	0.88738	0.90034	0.822761	0.792972	0.789011	0.789011	0.837792	0.829871	0.852191	0.815472	0.836261	0.817182	0.855494	0.668087							8	19	231	0.36	0.652778	0.416667	0.66129	0.875	0.525641	0.5125	0.632353	0.567568	0.625	0.609375	0.577778	0.680556	0.890625
8	20	232	0.917349	0.90106	0.904209	0.859481	0.88009	0.906459	0.86884	0.888731	0.83527	0.886301	0.865419	0.85534	0.798191	0.813761	0.759761	0.806832	0.792972	0.840582	0.850121	0.816191	0.849761	0.796573	0.849695	0.74266							8	20	232	0.37	0.706897	1.025	0.903846	1	0.638889	0.565789	0.660714	0.55	0.475	0.473684	0.675	0.657895	0.84375
8	21	233	0.910599	0.892419	0.890564	0.86659	0.87091	0.919419	0.85966	0.87766	0.86659	0.86209	0.86695	0.782981	0.791261	0.789011	0.673542	0.827082	0.838511	0.822402	0.836441	0.811691	0.858761	0.792792	0.84127	0.723216							8	21	233	0.38	0.38	1.1	0.98	0.588235	0.714286	0.554054	0.541667	0.597222	0.617647	0.671875	0.548077	0.510204	0.818182
8	22	234	0.917349	0.89431	0.868064	0.84877	0.86884	0.899349	0.87316	0.86452	0.88216	0.88477	0.87316	0.81502	0.778121	0.788832	0.764441	0.840402	0.849761	0.817902	0.816371	0.816011	0.867761	0.777674	0.845761	0.718185							8	22	234	0.4625	0.5	1.1	0.943396	0.671875	0.597222	0.671875	0.785714	0.423077	0.513514	0.488095	0.602273	0.543478	0.848485
8	23	235	0.924459	0.901239	0.917709	0.86434	0.87577	0.877209	0.88216	0.886481	0.86866	0.81052	0.87802	0.81934	0.757511	0.791082	0.777761	0.833652	0.827082	0.829511	0.830051	0.824832	0.863261	0.721516	0.843735	0.729479							8	23	235	0.616667	0.583333	0.621212	0.816667	0.75	0.628571	0.714286	0.75	0.5375	0.638889	0.391304	0.6	0.722222	0.59375
8	24	236	0.922209	0.82906	0.913029	0.86416	0.84877	0.877029	0.88252	0.888551	0.87784	0.74284	0.890621	0.83302	0.790722	0.791082	0.784332	0.851832	0.845441	0.865511	0.816371	0.854441	0.870191	0.717915	0.843522	0.649032							8	24	236	0.388889	0.645161	0.402439	0.69863	0.685714	0.583333	0.56	0.854167	0.455556	0.477778	0.348837	0.530612	0.828125	0.859375
8	25	237	0.922209	0.88027	0.899709	0.88009	0.83734	0.910779	0.8422	0.868301	0.86695	0.8152	0.889989	0.890981	0.792972	0.809261	0.815652	0.834191	0.830051	0.802871	0.820511	0.854441	0.863621	0.799362	0.851225	0.716508							8	25	237	0.68	0.7	0.84	0.710145	0.705882	0.474359	0.616438	0.82	0.423913	0.454545	0.291667	0.708333	0.785714	0.6625
8	26	238	0.926709	0.804849	0.871989	0.87316	0.83302	0.901419	0.83509	0.839231	0.89341	0.8422	0.860919	0.88909	0.811152	0.789191	0.825191	0.834191	0.845441	0.735011	0.861371	0.843731	0.863441	0.856871	0.847122	0.704226							8	26	238	1.03333	0.551282	0.68	0.643836	0.857143	0.625	0.818182	0.730769	0.475	0.443182	0.916667	0.597222	0.6375	0.6625
8	27	239	0.917709	0.782169	0.895209	0.83302	0.78595	0.922029	0.87559	0.852371	0.875231	0.86866	0.829599	0.84616	0.777761	0.800261	0.813941	0.836261	0.856511	0.771731	0.845441	0.829511	0.829511	0.836261	0.84004	0.703668							8	27	239	0.5	0.614286	0.6	0.625	1	0.642857	0.785714	0.803571	0.59375	0.59375	0.5625	0.618421	0.742857	0.736111
8	28	240	0.940029	0.74734	0.732669	0.87766	0.76327	0.924279	0.87091	0.877301	0.884231	0.87802	0.89377	0.86227	0.790902	0.824652	0.820511	0.849941	0.831761	0.784871	0.841121	0.838152	0.854621	0.788564	0.839857	0.641968							8	28	240	0.566667	0.694444	0.854545	0.5875	0.5	0.666667	0.512821	0.61194	0.514286	0.475	0.3875	0.575	0.579545	0.75
8	29	241	0.926709	0.74356	0.771314	0.861731	0.827621	0.908709	0.861551	0.88009	0.872441	0.83302	0.88738	0.88684	0.824652	0.820511	0.771371	0.852011	0.836082	0.776051	0.825551	0.828792	0.834731	0.842472	0.83969	0.686054							8	29	241	0.8	0.43	0.575	0.583333	0.575	0.75	0.609375	0.807692	0.642857	0.833333	0.5	0.557143	0.511905	0.735294
8	30	242	0.928779	0.802599	0.825314	0.863441	0.85966	0.913029	0.88927	0.80584	0.85534	0.8737	0.88909	0.90709	0.829332	0.797292	0.780191	0.863621	0.838405	0.764261	0.841301	0.835902	0.83941	0.854082	0.848043	0.682176							8	30	242	0.553571	0.401961	0.505882	0.7	0.666667	0.9375	0.625	0.9375	0.666667	0.552632	0.409091	0.527778	0.443182	0.942308
8	31	243	0.933279	0.880989	0.766419	0.839051	0.85966	0.915279	0.88909	0.726191	0.88666	0.85066	0.87316	0.89791	0.786222	0.808902	0.754902	0.863261	0.845528	0.794103	0.863261	0.838691	0.865871	0.791533	0.842301	0.681564							8	31	243	0.3875	0.48	0.82	0.6375	0.609375	0.666667	0.513514	0.722222	0.480519	0.734375	0.660714	0.56	0.671429	0.734375
9	1	244	0.895209	0.88045	0.76831	0.85588	0.84616	0.922029	0.86677	0.843371	0.843731	0.86245	0.86434	0.90934	0.814753	0.811332	0.780011	0.833832	0.847691	0.825371	0.825011	0.845441	0.834551	0.794143	0.844099	0.709244							9	1	244	0.8	0.7	0.865385	0.602564	0.5	0.671875	0.642857	0.632353	0.633333	0.630769	0.544118	0.5	0.808824	0.657143
9	2	245	0.901959	0.874239	0.84013	0.85156	0.85534	0.919599	0.88927	0.877301	0.83491	0.88252	0.87334	0.888731	0.835902	0.817902	0.791441	0.831941	0.833652	0.834371	0.829152	0.829691	0.858941	0.793783	0.852076	0.698188							9	2	245	0.53125	0.56	0.330769	0.734375	0.792453	0.770833	0.660714	0.75	0.425	0.578125	0.537313	0.526316	0.628571	0.821429
9	3	246	0.816459	0.87631	0.88045	0.87334	0.87091	0.910599	0.8782	0.886301	0.85066	0.88495	0.87631	0.87388	0.800082	0.815832	0.778121	0.824472	0.815652	0.845261	0.853722	0.913121	0.863441	0.833292	0.855517	0.708043							9	3	246	0.6	0.5875	0.411111	0.616438	0.875	0.74	0.689655	0.589286	0.616667	0.546875	0.515625	0.583333	0.625	0.775862
9	4	247	0.748959	0.89431	0.88981	0.86677	0.875231	0.907989	0.86452	0.79495	0.85084	0.8782	0.874239	0.86227	0.815652	0.827801	0.775871	0.784152	0.847332	0.838691	0.811332	0.823481	0.854621	0.836441	0.841975	0.675319							9	4	247	0.45	0.542857	0.7	0.5375	0.640625	0.589286	0.696429	0.634615	0.527778	0.875	0.589286	0.513889	0.479167	0.671875
9	5	248	0.865959	0.88081	0.89431	0.836801	0.86902	0.938231	0.86677	0.710261	0.78091	0.87127	0.876489	0.89584	0.824832	0.776051	0.745902	0.714042	0.840761	0.818441	0.852191	0.863261	0.871902	0.795402	0.835884	0.674885							9	5	248	0.35	0.706897	0.716667	0.5625	0.5	0.542373	0.740741	0.765625	0.5375	0.708333	0.432432	0.525	0.578947	0.98
9	6	249	0.867849	0.883239	0.88891	0.845801	0.85759	0.75166	0.679301	0.692801	0.85084	0.87109	0.867669	0.90259	0.822402	0.760301	0.833832	0.746504	0.822582	0.800981	0.843371	0.833472	0.783073	0.838511	0.820199	0.6504							9	6	249	0.3875	0.6	0.6	0.716667	0.795918	0.581081	0.5625	0.586667	0.555556	0.607143	0.4125	0.727273	0.635135	0.734375
9	7	250	0.906314	0.852099	0.845082	0.886301	0.86884	0.713051	0.70234	0.80359	0.760301	0.87577	0.860739	0.897731	0.813402	0.797652	0.827082	0.740151	0.815652	0.81727	0.850121	0.899441	0.827441	0.849222	0.827709	0.656468							9	7	250	0.483333	0.660714	0.758621	0.566667	0.53125	0.5875	0.465116	0.8125	0.6875	0.5	0.416667	0.609375	0.5125	0.638889
9	8	251	0.836564	0.870099	0.84706	0.854441	0.85534	0.75931	0.77263	0.85084	0.82609	0.844722	0.87163	0.897551	0.793332	0.820152	0.822582	0.715377	0.813582	0.726551	0.820871	0.749051	0.848231	0.758595	0.816118	0.709647							9	8	251	0.464286	0.650794	0.727273	0.955556	0.62069	0.8125	0.59375	0.696429	0.5	0.546875	0.7	0.5	0.45	0.671875
9	9	252	0.861314	0.869739	0.85381	0.877481	0.85966	0.86281	0.814121	0.79288	0.86227	0.843551	0.88252	0.877301	0.804761	0.822222	0.789191	0.705582	0.822402	0.758051	0.856691	0.758231	0.813941	0.765345	0.825176	0.695673							9	9	252	0.35	0.5	0.533333	0.629032	0.701754	0.7	0.65	0.696429	0.596774	0.5	0.551724	0.471429	0.638889	1.05
9	10	253	0.859064	0.887919	0.79756	0.86677	0.87145	0.881169	0.82816	0.78991	0.82681	0.83059	0.88027	0.886481	0.829332	0.802691	0.775691	0.74266	0.806472	0.78541	0.854621	0.818877	0.809981	0.755713	0.826709	0.660711							9	10	253	0.58	0.634615	0.7	0.785714	0.53125	0.589286	0.546875	0.711538	0.5	0.660377	0.566667	0.425	0.52439	0.711864
9	11	254	0.883959	0.88756	0.833739	0.8602	0.814481	0.921489	0.689832	0.83509	0.877481	0.84688	0.85588	0.88909	0.827261	0.748778	0.800621	0.775871	0.827261	0.77866	0.868121	0.836082	0.80116	0.799003	0.829932	0.707232							9	11	254	0.527273	0.65	0.709091	0.72	0.610169	0.9375	0.55	0.678571	0.6	0.583333	0.428571	0.578125	0.767857	0.676471
9	12	255	0.892959	0.982239	0.86002	0.85552	0.859301	0.89845	0.636103	0.82591	0.83077	0.85327	0.84877	0.96127	0.822222	0.786582	0.799902	0.766871	0.836261	0.807371	0.825011	0.861371	0.753551	0.761384	0.83296	0.694864							9	12	255	0.385714	0.35	0.683333	0.65	0.66	0.894737	0.833333	0.76	0.578125	0.76087	0.5625	0.35	0.895833	0.691176
9	13	256	0.903849	0.892239	0.8782	0.87127	0.84634	0.90016	0.73177	0.77884	0.76066	0.86002	0.86713	0.89566	0.778932	0.809082	0.790902	0.769301	0.838691	0.800441	0.829332	0.867941	0.780191	0.789463	0.82911	0.652498							9	13	256	0.4	0.62	0.514286	0.7	1.02778	0.52381	0.5625	0.770833	0.488095	0.6	0.416667	0.44898	0.783333	0.9
9	14	257	0.908564	0.930489	0.89359	0.88252	0.86695	0.88981	0.78352	0.85552	0.80845	0.81556	0.88945	0.92716	0.784152	0.827082	0.786582	0.764621	0.831761	0.818801	0.845082	0.868301	0.833652	0.779292	0.845041	0.655514							9	14	257	0.35	1	0.55	0.584615	0.777778	0.64	0.578125	0.666667	0.4375	0.642857	0.375	0.72	0.540541	0.875
9	15	258	0.910814	0.90331	0.887739	0.85066	0.83491	0.921669	0.79738	0.870731	0.75895	0.75706	0.86731	0.89359	0.798191	0.838332	0.796121	0.828972	0.807011	0.791801	0.865871	0.848231	0.807371	0.688937	0.832953	0.69993							9	15	258	0.416667	0.756757	0.607143	0.714286	0.75	0.690476	0.804348	0.708333	0.607143	0.5	0.432432	0.507246	0.5125	0.769231
9	16	259	0.908709	0.861279	0.887739	0.84445	0.85588	0.885669	0.85741	0.87595	0.7612	0.82834	0.88477	0.847871	0.816191	0.834191	0.795761	0.813402	0.840761	0.814301	0.83959	0.904301	0.83716	0.775064	0.844091	0.671645							9	16	259	0.52	0.8	0.566667	0.571429	0.642857	0.775	0.5625	0.603774	0.566667	0.5625	0.458333	0.59375	0.420455	0.555556
9	17	260	0.899529	0.811599	0.88495	0.85588	0.82402	0.88684	0.87145	0.87334	0.68677	0.72934	0.88009	0.735191	0.815832	0.834191	0.840761	0.857682	0.811332	0.829691	0.79666	0.868121	0.80359	0.797652	0.827023	0.734377							9	17	260	0.54	0.9	0.775	0.597015	0.637931	0.541667	0.729167	0.775	0.546875	0.928571	0.388889	0.632353	0.8125	0.8
9	18	261	0.863709	0.843279	0.849489	0.8692	0.834551	0.731051	0.81763	0.8737	0.7072	0.73681	0.854621	0.773621	0.804761	0.827441	0.845981	0.846432	0.862902	0.834551	0.780731	0.838691	0.73888	0.772722	0.813998	0.678753							9	18	261	0.482143	0.66	1.1	0.625	0.660714	0.86	0.840909	0.603774	0.5	0.515625	0.425	0.420455	0.683333	0.909091
9	19	262	0.897279	0.905739	0.856239	0.86227	0.695051	0.72313	0.79531	0.87541	0.84445	0.81745	0.85291	0.85102	0.816371	0.818261	0.841377	0.901871	0.831761	0.816371	0.832121	0.879731	0.80566	0.741042	0.830038	0.650065							9	19	262	0.418182	0.822222	0.633333	0.78	0.597222	0.660714	0.589286	0.708333	0.430556	0.5	0.4	0.35	0.555556	0.722222
9	20	263	0.861279	0.91681	0.824739	0.87613	0.75913	0.68659	0.77263	0.88909	0.848231	0.8647	0.88459	0.85327	0.805121	0.815652	0.841401	0.850301	0.814481	0.814301	0.88216	0.872441	0.848051	0.789823	0.835042	0.687539							9	20	263	0.48	0.516667	0.78	0.869565	0.5625	0.640625	0.6	0.708333	0.485294	0.589286	0.375	0.818182	0.475	0.711538
9	21	264	0.856959	0.885669	0.804669	0.87613	0.75652	0.666612	0.8062	0.86866	0.849941	0.84031	0.8917	0.854801	0.776231	0.829511	0.749682	0.870371	0.794051	0.859301	0.838691	0.872441	0.854801	0.739875	0.824688	0.712695							9	21	264	0.458333	0.825	0.583333	0.696429	0.535211	0.779412	0.53125	0.704545	0.555556	0.72093	0.389831	0.83871	0.714286	1.1
9	22	265	0.879279	0.818349	0.687941	0.84706	0.74734	0.692621	0.88666	0.843551	0.942551	0.85327	0.88666	0.807731	0.802691	0.838511	0.818261	0.8485	0.784691	0.87091	0.858402	0.808542	0.845621	0.598937	0.816731	0.716179							9	22	265	0.525	1.13333	0.51	0.6	0.696429	0.5625	0.645833	0.729167	0.35	0.615385	0.590909	1.1	0.666667	0.72
9	23	266	0.933279	0.778029	0.829239	0.867489	0.84877	0.699731	0.87559	0.87541	0.88027	0.88945	0.859481	0.746261	0.787121	0.820152	0.803051	0.812231	0.824832	0.83959	0.815472	0.793332	0.848051	0.731323	0.825371	0.729114							9	23	266	0.38	0.761905	0.4625	0.9	0.571429	0.525	0.690476	0.837838	0.766667	0.462963	0.458333	0.854167	0.7	1.1
9	24	267	0.852314	0.818529	0.86452	0.86695	0.86281	0.849669	0.84481	0.857231	0.859481	0.85759	0.876941	0.78316	0.771551	0.838871	0.791621	0.803051	0.828432	0.857103	0.643213	0.84409	0.82834	0.770112	0.825927	0.727171							9	24	267	0.349206	0.535714	0.66	0.770833	0.604167	0.533333	0.596154	0.54717	0.673913	0.535714	0.636364	0.5625	0.95	1.125
9	25	268	0.805029	0.870279	0.8827	0.87388	0.88288	0.880989	0.8647	0.863082	0.94795	0.809981	0.86677	0.77434	0.784871	0.775871	0.827621	0.795582	0.784511	0.848051	0.646902	0.83266	0.832481	0.838871	0.831364	0.665469							9	25	268	0.381818	0.35	0.4	0.528571	0.627451	0.7	0.563636	0.55	0.372093	0.6875	0.481481	0.4125	0.973684	0.975
9	26	269	0.814064	0.823029	0.84427	0.88288	0.89863	0.876669	0.85606	0.83509	0.867489	0.82195	0.85363	0.791981	0.809621	0.762731	0.840941	0.823121	0.751121	0.859301	0.746981	0.860832	0.854801	0.833292	0.832204	0.722983							9	26	269	0.35	0.6	0.35	0.85	0.645833	0.75	0.604167	0.909091	1.1	0.666667	0.648649	0.708333	0.918919	0.77551
9	27	270	0.820814	0.782709	0.82456	0.88927	0.8782	0.869739	0.89206	0.85102	0.86245	0.83356	0.8287	0.81241	0.809261	0.769121	0.821231	0.852371	0.872441	0.859301	0.778301	0.809441	0.77659	0.838152	0.833259	0.713232							9	27	270	0.35	0.545455	0.6	0.9	0.725	0.725	0.630435	1.1	0.775	0.508475	0.337838	0.64	0.660714	1
9	28	271	0.780459	0.787209	0.87784	0.85291	0.86641	0.890169	0.85831	0.88702	0.86506	0.80863	0.758051	0.587954	0.816191	0.764801	0.76516	0.852191	0.870011	0.867941	0.789731	0.852371	0.834731	0.821682	0.820674	0.737757							9	28	271	0.4	0.783784	0.55	0.791667	0.711111	0.625	0.75	0.520833	0.619048	0.553571	0.75	0.828571	0.642857	0.544118
9	29	272	0.834459	0.759849	0.91231	0.823301	0.85381	0.87631	0.84031	0.9187	0.90952	0.86434	0.88459	0.720432	0.831761	0.791621	0.708371	0.834371	0.761744	0.89827	0.782801	0.841301	0.84391	0.768494	0.830026	0.63624							9	29	272	0.35	0.516667	0.42	0.567164	0.744186	0.7	0.535714	0.439024	0.470588	0.574074	0.372881	0.384615	0.472222	0.8
9	30	273	0.84706	0.72502	0.84931	0.77659	0.818169	0.88288	0.8737	0.86038	0.854441	0.85588	0.816731	0.77659	0.829332	0.755441	0.80566	0.852551	0.654823	0.849761	0.78577	0.877481	0.88234	0.806292	0.819827	0.766773							9	30	273	0.35	0.888889	1.1	0.642857	0.535714	0.681818	0.725	1.1	0.861111	0.681818	0.833333	0.625	0.447368	1.1
10	1	274	0.710801	0.858669	0.833919	0.73402	0.871989	0.89188	0.89152	0.83077	0.92077	0.82906	0.800981	0.76291	0.822042	0.631603	0.789731	0.856691	0.723402	0.84409	0.72709	0.845082	0.795941	0.829152	0.809187	0.72808							10	1	274	0.62	1.07407	0.62	0.48	0.625	0.407407	0.707317	0.636364	0.65625	0.583333	0.364865	0.58	0.637931	0.946429
10	2	275	0.795849	0.92806	0.78145	0.79513	0.86416	0.887919	0.872082	0.87838	0.86245	0.76138	0.81763	0.726731	0.829511	0.74491	0.753551	0.875051	0.78316	0.845441	0.710801	0.807551	0.843731	0.828792	0.817896	0.69093							10	2	275	0.4	0.482759	0.85	0.566667	0.525	0.54	0.576271	0.581395	0.710526	0.520833	0.54	0.625	0.636364	0.5
10	3	276	0.843279	0.90781	0.802419	0.76606	0.780731	0.815739	0.84913	0.88702	0.8647	0.77191	0.84184	0.748871	0.809261	0.751121	0.761472	0.865691	0.809981	0.85552	0.695051	0.75841	0.818981	0.812862	0.809903	0.776496							10	3	276	0.327586	0.54	0.966667	0.68	1.03125	0.9	0.5	1.08696	0.7	0.588235	0.413793	0.4375	0.704545	0.8
10	4	277	0.852099	0.903849	0.74059	0.7837	0.75913	0.84445	0.80881	0.80188	0.81088	0.86866	0.88963	0.825551	0.755261	0.767051	0.802691	0.740143	0.829691	0.823481	0.73609	0.67741	0.82141	0.840582	0.803775	0.693711							10	4	277	0.35	0.805556	0.6	0.461538	0.604167	0.7	0.794118	0.828571	0.84375	0.625	0.459459	0.604167	0.923077	0.725
10	5	278	0.867849	0.910959	0.74041	0.85066	0.81295	0.869739	0.692621	0.717731	0.8242	0.86902	0.87352	0.841301	0.758051	0.778121	0.809801	0.673182	0.848051	0.852551	0.843011	0.726731	0.78541	0.843011	0.808586	0.689182							10	5	278	0.5	0.736842	0.485714	0.630435	0.416667	0.7	0.678571	0.9	0.7	0.685714	0.46	0.75	0.825	0.72
10	6	279	0.888279	0.901599	0.76588	0.834371	0.7882	0.829599	0.84409	0.69613	0.81331	0.86281	0.849941	0.847871	0.726731	0.827441	0.88891	0.647713	0.859301	0.868301	0.868481	0.84841	0.73609	0.830323	0.819263	0.683836							10	6	279	0.525	0.742857	0.3875	0.729167	0.810811	0.75	0.418182	0.5	0.65	1.04348	0.604167	0.519231	0.62	0.611111
10	7	280	0.845529	0.906099	0.8512	0.86902	0.853989	0.847419	0.87163	0.79981	0.83356	0.86452	0.87595	0.82591	0.747792	0.820511	0.82159	0.664003	0.83059	0.866051	0.834551	0.749524	0.77452	0.881441	0.828873	0.645557							10	7	280	0.38	0.575	0.375	0.85	0.594595	0.5625	0.475	0.519231	0.543478	0.52	0.35	0.509434	0.75	0.96875
10	8	281	0.739871	0.906099	0.90916	0.78163	0.85102	0.9007	0.839231	0.72727	0.8557	0.83338	0.87406	0.81241	0.899082	0.829332	0.839051	0.673362	0.80809	0.800981	0.845801	0.751481	0.76741	0.813042	0.820826	0.740717							10	8	281	0.62	0.675676	0.787879	0.55	0.6	0.78125	0.5625	0.75	0.6	0.65	0.395833	0.7	0.56	0.942857
10	9	282	0.576073	0.953529	0.86416	0.680652	0.84706	0.877029	0.84652	0.784239	0.8872	0.758231	0.867489	0.76084	0.834011	0.841121	0.847871	0.74941	0.787481	0.818981	0.854801	0.870011	0.86263	0.784152	0.816068	0.781885							10	9	282	0.5	0.5	1.1	0.575	0.84375	0.733333	0.595238	0.410714	0.6	0.815789	0.475	0.483333	1.1	1.1
10	10	283	0.691989	0.881349	0.968739	0.86263	0.829239	0.876669	0.84859	0.74095	0.86713	0.82402	0.817989	0.773981	0.784511	0.776051	0.836621	0.737981	0.843731	0.83059	0.852551	0.854981	0.79891	0.792792	0.822363	0.787315							10	10	283	0.35	1.1	0.428571	0.422535	0.4375	0.6	0.5625	0.642857	0.458333	0.482143	0.611111	0.5	1.1	1.14286
10	11	284	0.760029	0.899169	0.89863	0.87406	0.77281	0.83581	0.80863	0.82456	0.849489	0.86038	0.829419	0.76516	0.800441	0.778301	0.901152	0.726371	0.824652	0.80863	0.875051	0.863981	0.823301	0.793783	0.826082	0.686309							10	11	284	0.35	0.8	1.1	0.75	0.5625	0.875	0.65	0.555556	0.575	0.5	0.352941	0.3625	0.725	1
10	12	285	0.71431	0.676871	0.847419	0.865239	0.781989	0.770739	0.76759	0.83509	0.86209	0.86731	0.79945	0.771371	0.809621	0.788472	0.83302	0.796301	0.848231	0.758231	0.87766	0.74491	0.825551	0.709187	0.797757	0.794275							10	12	285	0.35	1.1	0.766667	0.90625	0.6	0.638889	0.725	0.916667	0.71875	0.71875	0.785714	0.62	0.675	1.03125
10	13	286	0.692621	0.784239	0.83527	0.746169	0.74788	0.761919	0.8152	0.813669	0.83734	0.86056	0.74977	0.821231	0.840941	0.790902	0.80827	0.80566	0.85066	0.825371	0.877301	0.758151	0.823481	0.706932	0.797888	0.733221							10	13	286	0.8	0.574468	0.6	0.75	0.604167	0.5	0.520833	0.55	0.55	0.764706	0.357143	0.416667	0.675	0.64
10	14	287	0.81484	0.834279	0.719441	0.88063	0.86677	0.784599	0.8377	0.8557	0.87613	0.89359	0.748511	0.84841	0.861191	0.825731	0.767231	0.701261	0.872621	0.845981	0.852651	0.744371	0.83059	0.690371	0.816027	0.702288							10	14	287	0.433333	0.6	0.6	0.466667	0.35	0.525	0.625	0.609756	0.55	0.65	0.772727	0.5	0.866667	0.446429
10	15	288	0.84481	0.878739	0.771011	0.86713	0.86641	0.793239	0.81781	0.85777	0.895121	0.883871	0.910511	0.78784	0.906371	0.775871	0.77884	0.79216	0.845981	0.82609	0.75391	0.76516	0.80809	0.704862	0.824164	0.680349							10	15	288	0.35	0.733333	0.7	0.787879	0.35	0.705882	0.605263	0.916667	0.636364	0.594595	0.173913	0.5	0.541667	0.9375
10	16	289	0.8557	0.87631	0.82231	0.85984	0.87181	0.85831	0.797739	0.924731	0.81277	0.657704	0.88495	0.726551	0.829332	0.813761	0.77191	0.832301	0.823481	0.78352	0.73384	0.726371	0.84202	0.734472	0.810897	0.754024							10	16	289	0.35	0.575	0.574468	0.7	0.6875	0.575	0.555556	0.9375	0.913043	0.977273	0.774194	0.775	1.1	0.777778
10	17	290	0.73591	0.896919	0.85363	0.84913	0.825099	0.876489	0.75481	0.863981	0.92077	0.667244	0.851739	0.79045	0.825191	0.820332	0.76084	0.79909	0.861371	0.78406	0.717731	0.691902	0.856511	0.815472	0.80994	0.639271							10	17	290	0.421053	0.6875	0.65	0.5	0.75	0.65625	0.479167	1.1	0.351351	0.517647	0.545455	0.357143	0.964286	0.75
10	18	291	0.76363	0.9142	0.88216	0.7387	0.76588	0.878739	0.76138	0.9187	0.830051	0.737621	0.860919	0.76813	0.807731	0.824112	0.77452	0.872441	0.850301	0.77452	0.77902	0.86695	0.753191	0.806292	0.814963	0.657418							10	18	291	0.333333	0.92	0.433333	0.481481	0.69697	0.555556	0.479167	0.358974	0.833333	0.535714	0.5625	0.541667	0.833333	1.07143
10	19	292	0.847779	0.840849	0.849489	0.717731	0.79531	0.892239	0.77938	0.904481	0.787481	0.746981	0.81745	0.686051	0.736902	0.684432	0.73609	0.82366	0.786853	0.76966	0.77884	0.74284	0.748511	0.870191	0.788327	0.727147							10	19	292	0.433333	1.1	0.55	0.775	0.575	0.527778	0.468085	1.1	0.962963	0.56	0.416667	0.4	1.1	0.925
10	20	293	0.841029	0.892419	0.95281	0.77956	0.8692	0.896919	0.86695	0.789191	0.90016	0.773621	0.78352	0.701981	0.732582	0.748871	0.721332	0.761652	0.681283	0.827981	0.81934	0.706481	0.744011	0.866051	0.802588	0.698654							10	20	293	0.433333	0.733333	0.35	0.375	0.71875	0.75	0.575	1.1	0.555556	0.590909	0.65625	0.805556	0.6	0.604167
10	21	294	0.820599	0.894849	0.8107	0.77245	0.688753	0.901599	0.79216	0.76795	0.84913	0.82645	0.78181	0.87091	0.83941	0.749051	0.681463	0.728621	0.78766	0.86884	0.80359	0.767231	0.827082	0.806112	0.801656	0.718218		z-Test: Two Sample for Means	Alpha=0.01				10	21	294	0.325	0.7	1.1	0.625	0.975	0.863636	0.75	1.1	0.95	0.55	0.35	0.35	0.527778	0.6
10	22	295	0.816279	0.903849	0.83788	0.8152	0.74284	0.897279	0.79513	0.719981	0.86281	0.856239	0.876849	0.85084	0.83266	0.735551	0.793603	0.760301	0.81241	0.89359	0.76534	0.834371	0.823481	0.809082	0.819798	0.695404							10	22	295	0.366667	1.05	0.375	0.536585	0.375	0.791667	0.466667	0.84375	0.514286	0.5625	0.35	0.88	0.916667	0.852941
10	23	296	0.807099	0.935709	0.829419	0.816731	0.78181	0.867849	0.78163	0.74491	0.799989	0.831489	0.841029	0.79027	0.843551	0.762551	0.848051	0.78991	0.773082	0.883332	0.836981	0.84634	0.770472	0.759941	0.815552	0.695621			Snyder	FAO56-PM			10	23	296	0.466667	0.6	0.5	0.833333	0.625	0.833333	0.525	0.8125	0.657143	0.5625	0.35	0.35	1.1	1
10	24	297	0.816459	0.88738	0.872801	0.816551	0.768489	0.924099	0.74266	0.75652	0.80827	0.8332	0.849669	0.703691	0.812231	0.751481	0.816191	0.740862	0.82402	0.865032	0.841481	0.82159	0.861371	0.755441	0.81225	0.722193		Mean	0.836819	0.740266			10	24	297	0.35	1.1	0.65	0.634146	0.475	0.538462	0.78125	0.958333	0.625	0.588235	0.4375	1.1	0.46	0.75
10	25	298	0.88081	0.887919	0.87406	0.714582	0.766239	0.88081	0.742121	0.78595	0.84913	0.8827	0.829419	0.703871	0.825731	0.751301	0.879191	0.723761	0.87541	0.93184	0.803231	0.85516	0.938231	0.771191	0.825121	0.704315		Known Variance	0.000248	0.005545			10	25	298	0.4	0.566667	0.904762	0.638298	0.76	0.612903	0.823529	0.6875	0.782609	0.47619	0.35	0.466667	0.5	1.1
10	26	299	0.883599	0.759669	0.870099	0.630792	0.845169	0.90034	0.724121	0.79081	0.87406	0.85345	0.82906	0.754722	0.827621	0.76741	0.87595	0.78559	0.863981	0.86659	0.695151	0.83284	0.752924	0.777761	0.80735	0.736273		Observations	214	214			10	26	299	0.35	0.7	0.85	0.528571	0.59375	0.708333	0.583333	0.625	0.809524	0.5	0.46875	0.566667	1	0.857143
10	27	300	0.903849	0.796209	0.871989	0.746441	0.82681	0.753731	0.698832	0.81106	0.774612	0.802239	0.92338	0.875682	0.845801	0.634573	0.86866	0.782981	0.84625	0.80377	0.719801	0.82384	0.76966	0.770472	0.802302	0.721889		Hypothesized Mean Difference	0				10	27	300	0.35	0.653846	0.76	0.617021	0.689655	1.1	0.589286	0.580645	1.1	0.354167	0.35	0.35	0.625	1.1
10	28	301	0.991779	0.862989	0.88288	0.881621	0.813489	0.79684	0.742481	0.86281	0.792432	0.81313	0.894669	0.83941	0.816551	0.656533	0.87352	0.77677	0.812231	0.741042	0.745782	0.757511	0.77416	0.856511	0.817507	0.630709		z	18.5623				10	28	301	0.5	0.703704	1.1	0.35	0.59375	0.45	0.462963	0.666667	0.560976	0.529412	0.545455	0.558824	0.958333	0.544118
10	29	302	0.791801	0.74356	0.93895	0.86038	0.83995	0.639972	0.779652	0.769932	0.86209	0.847239	0.883419	0.88927	0.790003	0.629893	0.81484	0.77209	0.777941	0.789731	0.807551	0.902051	0.79702	0.848051	0.807972	0.70925		P(Z<=z) one-tail	0				10	29	302	0.947368	0.785714	0.4	1.1	0.633333	0.508772	0.694444	0.833333	0.5	0.365854	0.363636	0.52	0.65	0.8
10	30	303	0.879279	0.766239	0.84634	0.86506	0.614862	0.7702	0.87181	0.710533	0.92752	0.88459	0.883599	0.91663	0.770472	0.634033	0.796301	0.710261	0.870551	0.81016	0.856871	0.87559	0.77452	0.863621	0.813593	0.706783		z Critical one-tail	2.32635				10	30	303	0.35	0.625	0.454545	1.1	0.729167	0.5	0.432432	0.914286	0.545455	0.4375	0.75	0.6875	0.8125	0.735849
10	31	304	0.892419	0.668862	0.77677	0.775239	0.72988	0.93409	0.82609	0.79027	0.861191	0.869919	0.858489	0.9187	0.712511	0.689112	0.793871	0.714941	0.87316	0.793778	0.812051	0.832481	0.78802	0.835722	0.806708	0.71285		P(Z<=z) two-tail	0				10	31	304	0.55	0.975	0.466667	0.85	0.4	0.35	0.7	0.414634	1.1	0.384615	0.375	1.1	0.446429	0.55
																								ymean=	0.836819	0.740266		z Critical two-tail	2.57583
																								var1	0.000247828
																								var2		0.00554491
MO	DAY	DOY	1998	1999	2000	2001	2002	2003	2004	2005	2006	2007	2008	2009	2010	2011	2012	2013	2014	2015	2016	2017	2018	2019	Kp-Mod-Snyder	Kp-FAO56-PM
4	1	91	0.770505	0.794049	0.775071	0.73099	0.763467	0.762189	0.738132	0.74691	0.750429	0.779306	0.81525	0.788005	0.776245	0.698797	0.756424	0.697547	0.72224	0.76599	0.760122	0.75724	0.771372	0.804434	0.760214	0.927909
4	2	92	0.78775	0.791867	0.718618	0.819434	0.803618	0.746297	0.734486	0.781297	0.821806	0.788439	0.767495	0.761066	0.773745	0.72992	0.732802	0.755863	0.722368	0.78724	0.701806	0.779306	0.771934	0.798618	0.767081	0.869866
4	3	93	0.794434	0.806934	0.810377	0.771372	0.792061	0.75492	0.666986	0.79224	0.765939	0.763184	0.777189	0.770377	0.754306	0.751552	0.757368	0.799434	0.759091	0.792368	0.724995	0.76599	0.748618	0.801806	0.769161	0.885078
4	4	94	0.748184	0.831193	0.834382	0.787622	0.801806	0.735556	0.62691	0.75525	0.772368	0.755429	0.787495	0.778439	0.743618	0.789995	0.746181	0.775429	0.784052	0.78349	0.729995	0.766372	0.679486	0.771118	0.762926	0.892517
4	5	95	0.788132	0.800632	0.83175	0.787061	0.781806	0.732368	0.694995	0.739995	0.797368	0.776245	0.784486	0.806066	0.695302	0.782929	0.691118	0.785556	0.776679	0.740174	0.714306	0.727113	0.728311	0.752802	0.759782	0.850662
4	6	96	0.787443	0.76474	0.801193	0.783924	0.81599	0.724665	0.74175	0.724179	0.79775	0.783924	0.751424	0.765174	0.723236	0.78474	0.70224	0.789306	0.735556	0.752495	0.700302	0.697547	0.724434	0.756297	0.754923	0.902761
4	7	97	0.788821	0.828872	0.781679	0.773618	0.786372	0.773056	0.759255	0.749561	0.823439	0.778311	0.746603	0.760353	0.77349	0.761806	0.737929	0.769995	0.717802	0.739052	0.764306	0.763108	0.726372	0.758618	0.766474	0.881945
4	8	98	0.786882	0.815505	0.78849	0.768184	0.792368	0.737622	0.752571	0.692981	0.811755	0.767622	0.776552	0.781679	0.758236	0.77474	0.744179	0.755863	0.732726	0.785556	0.763311	0.783797	0.768184	0.756245	0.767957	0.822579
4	9	99	0.779382	0.810377	0.807368	0.798745	0.752368	0.76099	0.73425	0.72349	0.735174	0.781043	0.798745	0.78525	0.756806	0.77367	0.731986	0.76224	0.767703	0.725787	0.720429	0.746986	0.803745	0.747471	0.763818	0.839593
4	10	100	0.781321	0.817443	0.759127	0.790684	0.725811	0.770122	0.720939	0.75275	0.805122	0.795122	0.812316	0.769	0.756552	0.765226	0.740174	0.77974	0.78224	0.764052	0.75242	0.729995	0.80599	0.754231	0.769563	0.906924
4	11	101	0.760505	0.816882	0.800505	0.769868	0.730684	0.747061	0.737189	0.730122	0.80025	0.783872	0.743056	0.777189	0.757165	0.741986	0.77849	0.765429	0.774868	0.741858	0.78599	0.700302	0.795811	0.778618	0.764441	0.889757
4	12	102	0.74025	0.851066	0.737495	0.762929	0.7865	0.74525	0.752877	0.729	0.824	0.782061	0.779689	0.791321	0.743594	0.713721	0.778618	0.768184	0.747368	0.699613	0.804434	0.68867	0.8065	0.776245	0.764063	0.938682
4	13	103	0.737189	0.804	0.748415	0.782622	0.807189	0.776934	0.769689	0.702674	0.819816	0.763872	0.789382	0.73025	0.74599	0.741806	0.776118	0.745684	0.76849	0.728618	0.788957	0.761297	0.800122	0.722853	0.76418	0.843122
4	14	104	0.762571	0.797495	0.79974	0.789179	0.800377	0.814	0.789689	0.752802	0.734995	0.755122	0.761755	0.755811	0.759306	0.74224	0.790122	0.771118	0.767495	0.734306	0.778056	0.800684	0.798311	0.720915	0.77164	0.830732
4	15	105	0.777443	0.794127	0.823005	0.770556	0.779434	0.834127	0.763618	0.76974	0.74242	0.777622	0.730122	0.783924	0.751934	0.737674	0.775122	0.76099	0.743056	0.735556	0.812929	0.82275	0.754434	0.762165	0.772852	0.814525
4	16	106	0.765195	0.791066	0.8105	0.788618	0.803311	0.805939	0.695608	0.806679	0.807495	0.748311	0.789179	0.803311	0.701986	0.764179	0.770302	0.777113	0.754179	0.705863	0.781806	0.794995	0.696245	0.808056	0.771361	0.946186
4	17	107	0.810429	0.793132	0.728311	0.777368	0.762929	0.795811	0.705684	0.798439	0.80224	0.754689	0.750556	0.814816	0.736552	0.73099	0.776934	0.773618	0.710047	0.766424	0.774995	0.783872	0.735122	0.767726	0.76594	0.827246
4	18	108	0.77025	0.790632	0.713363	0.771118	0.79599	0.785429	0.807061	0.802495	0.819561	0.754613	0.774127	0.762189	0.77349	0.713924	0.743618	0.787495	0.767547	0.776679	0.758745	0.76724	0.733311	0.777802	0.770304	0.897588
4	19	109	0.788872	0.807877	0.79117	0.769613	0.818745	0.749103	0.74525	0.772674	0.788439	0.721986	0.78525	0.761031	0.759868	0.763363	0.716962	0.798056	0.808618	0.786552	0.724306	0.770429	0.756806	0.766858	0.770538	0.873048
4	20	110	0.774052	0.808872	0.817929	0.78275	0.784306	0.796118	0.825122	0.761424	0.804943	0.754052	0.7915	0.756031	0.742802	0.749358	0.773363	0.798184	0.75474	0.76599	0.710429	0.777368	0.800556	0.750915	0.7764	0.849498
4	21	111	0.74849	0.801066	0.836882	0.779816	0.79525	0.796552	0.823693	0.7665	0.805684	0.753311	0.7915	0.754095	0.786986	0.754306	0.784306	0.789868	0.76974	0.775174	0.727929	0.785684	0.759434	0.681018	0.775786	0.8782
4	22	112	0.769	0.758872	0.845632	0.731679	0.824434	0.788311	0.789689	0.79974	0.79775	0.745122	0.794255	0.769127	0.764052	0.818184	0.775429	0.779306	0.772929	0.727037	0.665736	0.73099	0.706297	0.667141	0.764578	0.906996
4	23	113	0.762316	0.775505	0.831321	0.753542	0.829	0.795939	0.794995	0.781245	0.740302	0.737368	0.772443	0.782368	0.734052	0.796118	0.748745	0.776245	0.774868	0.725915	0.693618	0.71316	0.759179	0.677014	0.761602	0.900465
4	24	114	0.739816	0.763693	0.833132	0.743236	0.813184	0.738363	0.784434	0.765556	0.826934	0.66941	0.723872	0.792368	0.72599	0.789306	0.760429	0.754306	0.745556	0.73724	0.728184	0.706424	0.763872	0.717037	0.755561	0.912394
4	25	115	0.766882	0.736066	0.819382	0.75349	0.792622	0.820429	0.795505	0.788745	0.682547	0.720811	0.782316	0.78724	0.731118	0.763618	0.752929	0.720302	0.706424	0.747495	0.719379	0.742495	0.70724	0.715915	0.752407	0.830703
4	26	116	0.792853	0.751066	0.815071	0.769868	0.789306	0.787495	0.750122	0.781934	0.65492	0.730556	0.7665	0.797061	0.716424	0.767929	0.77224	0.712929	0.74617	0.715302	0.751552	0.726245	0.693924	0.737113	0.751208	0.867773
4	27	117	0.845377	0.775122	0.761066	0.775122	0.773311	0.715174	0.715099	0.796806	0.726245	0.730047	0.784995	0.794689	0.756679	0.744179	0.760556	0.70974	0.76974	0.728056	0.747674	0.689052	0.781372	0.742368	0.755567	0.859806
4	28	118	0.819816	0.779689	0.822877	0.694868	0.773184	0.750122	0.759561	0.802061	0.779	0.763439	0.780122	0.779434	0.759792	0.725608	0.739306	0.694655	0.77349	0.716118	0.775302	0.697802	0.794306	0.718542	0.75905	0.790871
4	29	119	0.796882	0.799127	0.820505	0.70724	0.791372	0.783184	0.721372	0.7715	0.716986	0.788872	0.761934	0.790377	0.775863	0.76117	0.732368	0.702368	0.748542	0.727622	0.771118	0.745556	0.785122	0.719486	0.759935	0.786832
4	30	120	0.798693	0.783566	0.811193	0.69724	0.788311	0.776627	0.790122	0.802368	0.781986	0.774179	0.77525	0.800684	0.801806	0.770302	0.732368	0.706118	0.757113	0.765174	0.778056	0.751934	0.775811	0.716986	0.769813	0.758158
5	1	121	0.799382	0.773693	0.806882	0.739792	0.780811	0.725122	0.779561	0.812674	0.78599	0.783311	0.776934	0.806934	0.799434	0.784052	0.730556	0.723056	0.75474	0.758924	0.726552	0.728924	0.719613	0.750481	0.765792	0.90516
5	2	122	0.749255	0.766193	0.808821	0.670608	0.803311	0.683618	0.751679	0.765939	0.786934	0.780939	0.79775	0.771118	0.779052	0.763108	0.781806	0.694868	0.752113	0.768363	0.761552	0.768056	0.732113	0.736297	0.757886	0.854409
5	3	123	0.744943	0.78775	0.800632	0.739434	0.783872	0.713439	0.828184	0.736934	0.784561	0.747622	0.790684	0.776066	0.769486	0.77599	0.803056	0.727368	0.770556	0.791806	0.772802	0.788056	0.703236	0.753236	0.767714	0.735723
5	4	124	0.7315	0.778566	0.779306	0.748056	0.787495	0.7115	0.806372	0.716858	0.767061	0.747929	0.768311	0.771297	0.77599	0.770429	0.821867	0.752368	0.757495	0.763745	0.735226	0.780556	0.710429	0.738287	0.760029	0.907655
5	5	125	0.729434	0.760505	0.814995	0.76025	0.779306	0.723311	0.798311	0.743872	0.768745	0.773311	0.795122	0.737523	0.77474	0.777802	0.794868	0.754179	0.693797	0.746118	0.771986	0.789306	0.76974	0.753618	0.764129	0.821132
5	6	126	0.779943	0.756066	0.839943	0.763184	0.745122	0.730811	0.785505	0.813184	0.778184	0.733872	0.778872	0.824995	0.779868	0.780429	0.786806	0.750479	0.780684	0.741118	0.791806	0.789613	0.784868	0.687853	0.772873	0.774759
5	7	127	0.775632	0.799179	0.818821	0.781424	0.745122	0.635481	0.7765	0.796066	0.766372	0.70974	0.727061	0.804434	0.780429	0.781245	0.775556	0.750429	0.770684	0.727495	0.77724	0.765915	0.797495	0.728287	0.763209	0.818628
5	8	128	0.753566	0.754561	0.788132	0.824434	0.739434	0.666986	0.798056	0.777622	0.762674	0.762061	0.827622	0.793439	0.779868	0.746806	0.771806	0.757929	0.802368	0.713108	0.780684	0.785863	0.793745	0.719665	0.768201	0.779543
5	9	129	0.740939	0.80525	0.782443	0.816118	0.728745	0.684179	0.794561	0.780429	0.753056	0.794306	0.8015	0.782877	0.793184	0.757368	0.755684	0.767929	0.79474	0.764434	0.755122	0.781934	0.794995	0.735174	0.771135	0.885284
5	10	130	0.773872	0.789689	0.736882	0.821755	0.721372	0.683745	0.716858	0.78275	0.770122	0.786627	0.75724	0.765811	0.735429	0.753618	0.730608	0.766245	0.778745	0.75099	0.738745	0.718797	0.798311	0.747674	0.755722	0.852138
5	11	131	0.804561	0.774816	0.758132	0.846372	0.725684	0.694434	0.778415	0.73775	0.780122	0.8265	0.775122	0.770811	0.726986	0.764052	0.747929	0.78599	0.773745	0.775556	0.782929	0.772674	0.771806	0.75974	0.769733	0.750169
5	12	132	0.764995	0.764943	0.765071	0.786934	0.778255	0.71025	0.796806	0.737189	0.749561	0.797368	0.781627	0.760811	0.758363	0.742113	0.77849	0.794995	0.772929	0.752368	0.77474	0.768056	0.785556	0.724358	0.765717	0.857878
5	13	133	0.806372	0.790556	0.802443	0.76117	0.790684	0.717189	0.77474	0.776245	0.785122	0.804561	0.752877	0.759255	0.770302	0.78099	0.764306	0.76474	0.776552	0.768618	0.78099	0.762368	0.76974	0.70492	0.771125	0.858547
5	14	134	0.817877	0.810122	0.802443	0.762292	0.801934	0.743618	0.764995	0.754561	0.738872	0.796934	0.78275	0.73775	0.773618	0.784868	0.772368	0.771806	0.777113	0.769434	0.776934	0.76599	0.769179	0.696731	0.771463	0.843144
5	15	135	0.807189	0.796066	0.818821	0.816806	0.788311	0.783872	0.798745	0.731372	0.713184	0.782189	0.774995	0.747061	0.780684	0.773056	0.77474	0.766118	0.786245	0.755174	0.766934	0.754868	0.786245	0.693542	0.772555	0.826279
5	16	136	0.805483	0.805505	0.811193	0.812061	0.761934	0.776372	0.76275	0.798311	0.774868	0.761806	0.797368	0.773872	0.789689	0.756245	0.766424	0.770429	0.776245	0.778745	0.763056	0.760556	0.766245	0.682853	0.775091	0.856515
5	17	137	0.806193	0.808439	0.846627	0.753311	0.762877	0.726627	0.812877	0.76025	0.829995	0.806372	0.809689	0.755811	0.772495	0.700736	0.763745	0.782368	0.775302	0.763439	0.770863	0.733745	0.739306	0.722853	0.772905	0.813382
5	18	138	0.790684	0.792316	0.789943	0.735811	0.797113	0.723311	0.753924	0.712061	0.793311	0.829561	0.799689	0.752877	0.764868	0.706858	0.734613	0.781118	0.743797	0.743311	0.752547	0.737622	0.715556	0.714717	0.757528	0.779761
5	19	139	0.805122	0.767877	0.7965	0.727061	0.794561	0.762622	0.782622	0.750122	0.769	0.784689	0.815939	0.745556	0.762929	0.760174	0.75349	0.779868	0.765302	0.698363	0.763363	0.750302	0.709306	0.75974	0.763841	0.869613
5	20	140	0.796424	0.636476	0.808693	0.728872	0.800684	0.765811	0.738184	0.745811	0.790122	0.744613	0.810505	0.785684	0.770684	0.735863	0.754613	0.761118	0.762802	0.709358	0.761552	0.796424	0.733184	0.77349	0.759589	0.768444
5	21	141	0.792495	0.712316	0.810632	0.733311	0.778056	0.793184	0.729561	0.772061	0.791806	0.783056	0.799127	0.781245	0.765556	0.753236	0.77974	0.759179	0.76349	0.751118	0.780556	0.779179	0.741372	0.764052	0.768833	0.73818
5	22	142	0.820122	0.737443	0.808132	0.719	0.777495	0.788056	0.784561	0.772495	0.797061	0.7765	0.809561	0.79775	0.74349	0.751679	0.771679	0.76724	0.745429	0.760047	0.769995	0.800556	0.774306	0.724665	0.772603	0.757685
5	23	143	0.821882	0.750377	0.810505	0.729689	0.794179	0.761245	0.783056	0.783618	0.792061	0.774995	0.791679	0.784434	0.757547	0.739868	0.769613	0.763056	0.736118	0.76617	0.761986	0.785429	0.725429	0.755556	0.769931	0.717349
5	24	144	0.796321	0.77525	0.806755	0.709179	0.769434	0.769689	0.770122	0.778184	0.728311	0.7715	0.804434	0.796245	0.751552	0.741118	0.750915	0.770684	0.747113	0.785556	0.757674	0.77974	0.785302	0.692292	0.765335	0.782728
5	25	145	0.788132	0.773797	0.797877	0.638797	0.768872	0.74849	0.770811	0.786245	0.692622	0.769561	0.814434	0.783745	0.755429	0.74849	0.756731	0.730302	0.752113	0.768363	0.755608	0.782495	0.780174	0.707344	0.757747	0.831865
5	26	146	0.77425	0.830684	0.771882	0.73025	0.732061	0.75224	0.762622	0.786934	0.784995	0.784434	0.800122	0.748056	0.76275	0.755863	0.761424	0.764052	0.777368	0.753542	0.76974	0.763618	0.75599	0.756552	0.767247	0.730991
5	27	147	0.753132	0.756755	0.766193	0.73525	0.768184	0.768184	0.778184	0.731552	0.78224	0.783872	0.797061	0.695429	0.726679	0.772802	0.771679	0.77599	0.787368	0.766118	0.761118	0.777802	0.754	0.709665	0.759966	0.688312
5	28	148	0.780811	0.737443	0.767443	0.733872	0.776118	0.781245	0.7815	0.779179	0.783056	0.77974	0.769561	0.701679	0.769306	0.777113	0.778056	0.764052	0.764306	0.755863	0.786806	0.762368	0.741245	0.705047	0.762537	0.76193
5	29	149	0.803311	0.789	0.805632	0.739868	0.783184	0.792877	0.784434	0.788618	0.75275	0.782189	0.790684	0.702368	0.778745	0.77224	0.747929	0.767368	0.76974	0.743415	0.784995	0.777368	0.747929	0.695787	0.768201	0.775264
5	30	150	0.80525	0.793056	0.799943	0.770556	0.764868	0.781603	0.773872	0.818745	0.779	0.749434	0.694995	0.730684	0.758924	0.770556	0.73367	0.733618	0.777368	0.791806	0.795429	0.76349	0.791806	0.713108	0.767808	0.753812
5	31	151	0.821066	0.799689	0.784255	0.770556	0.763618	0.813056	0.808005	0.844561	0.751934	0.77724	0.720811	0.735684	0.751806	0.769306	0.759613	0.741552	0.777553	0.7815	0.787929	0.780302	0.790122	0.737547	0.775805	0.700487
6	1	152	0.814816	0.804127	0.764943	0.70775	0.806245	0.789434	0.769179	0.820377	0.794995	0.783056	0.7765	0.754995	0.749943	0.75849	0.76349	0.767674	0.769613	0.739868	0.794306	0.779995	0.779306	0.72492	0.773365	0.774004
6	2	153	0.813566	0.788439	0.791882	0.697061	0.755122	0.801372	0.794434	0.80275	0.771934	0.787061	0.804434	0.746245	0.74974	0.761297	0.753618	0.775556	0.769517	0.747674	0.789868	0.779868	0.785684	0.755736	0.773766	0.737889
6	3	154	0.812443	0.783184	0.78025	0.758872	0.727622	0.778311	0.786118	0.792189	0.78275	0.791372	0.806372	0.772622	0.772802	0.760302	0.735556	0.760174	0.75599	0.77849	0.824	0.779306	0.782495	0.770863	0.776913	0.796476
6	4	155	0.796627	0.800939	0.794382	0.782622	0.750122	0.779	0.782061	0.799	0.79275	0.795811	0.811934	0.782368	0.76099	0.774179	0.779306	0.753924	0.749306	0.773236	0.77599	0.778056	0.784995	0.766297	0.780177	0.681514
6	5	156	0.746825	0.788745	0.803693	0.77349	0.779995	0.735556	0.770377	0.777495	0.800811	0.79775	0.799	0.771424	0.774613	0.77099	0.739793	0.745736	0.720226	0.780429	0.77224	0.786118	0.781552	0.753236	0.771368	0.745815
6	6	157	0.801755	0.803311	0.801627	0.744231	0.761245	0.670684	0.782061	0.768618	0.780302	0.7965	0.804434	0.763618	0.774052	0.757113	0.739793	0.760863	0.80349	0.783363	0.779052	0.770863	0.766245	0.740174	0.770609	0.740936
6	7	158	0.801066	0.812189	0.80275	0.740684	0.749561	0.7015	0.762495	0.753311	0.783363	0.767155	0.814306	0.759995	0.750481	0.76849	0.73617	0.735174	0.792929	0.777929	0.777674	0.785556	0.758184	0.730047	0.76641	0.746649
6	8	159	0.810632	0.80275	0.803566	0.768745	0.731066	0.808311	0.77724	0.786245	0.780302	0.778184	0.808056	0.738184	0.761552	0.766552	0.724179	0.766806	0.779306	0.771118	0.776245	0.759306	0.729434	0.710047	0.769901	0.708193
6	9	160	0.808693	0.809	0.754689	0.755684	0.709561	0.792495	0.764434	0.782495	0.742929	0.834561	0.804561	0.732061	0.763363	0.767674	0.744868	0.72599	0.781245	0.750047	0.778056	0.760429	0.766679	0.726986	0.766205	0.743919
6	10	161	0.813693	0.807877	0.763005	0.734434	0.70775	0.807061	0.746372	0.796934	0.740684	0.791066	0.815556	0.732622	0.766986	0.764052	0.748618	0.760863	0.780429	0.754665	0.776552	0.769486	0.776297	0.74316	0.768098	0.753833
6	11	162	0.828132	0.805939	0.753005	0.723872	0.757113	0.798745	0.746934	0.788056	0.738618	0.773363	0.7815	0.792622	0.751679	0.746297	0.766424	0.76099	0.776424	0.768236	0.780863	0.757674	0.773797	0.74867	0.769043	0.754029
6	12	163	0.818132	0.79275	0.778821	0.712061	0.760302	0.789561	0.769561	0.77849	0.758184	0.783745	0.753745	0.793618	0.723618	0.774486	0.771552	0.75974	0.772674	0.763363	0.795684	0.77599	0.770302	0.761552	0.770815	0.744294
6	13	164	0.814943	0.784995	0.644306	0.72025	0.769434	0.7865	0.777061	0.791245	0.776679	0.779561	0.778311	0.792495	0.739052	0.784052	0.771679	0.770302	0.765429	0.77349	0.790684	0.779052	0.78599	0.77224	0.770352	0.727806
6	14	165	0.803566	0.857189	0.63867	0.750811	0.758872	0.782622	0.787622	0.768872	0.772929	0.793311	0.805556	0.798745	0.75742	0.776552	0.772929	0.756552	0.75599	0.775302	0.779306	0.795429	0.801245	0.762292	0.775081	0.765
6	15	166	0.811627	0.808005	0.693184	0.762368	0.776245	0.785684	0.771245	0.789995	0.760684	0.792061	0.809995	0.786372	0.760047	0.776679	0.757622	0.755174	0.776552	0.763236	0.759868	0.784868	0.791118	0.755481	0.774005	0.788429
6	16	167	0.804943	0.796755	0.719382	0.776118	0.776806	0.789434	0.786118	0.776934	0.783184	0.795811	0.789052	0.715684	0.754486	0.772929	0.752431	0.760174	0.768363	0.76974	0.77849	0.778056	0.770684	0.768797	0.772017	0.738155
6	17	168	0.797571	0.784816	0.791321	0.685174	0.78474	0.788745	0.774179	0.746245	0.779561	0.793872	0.808184	0.732495	0.725863	0.776552	0.749931	0.747674	0.77099	0.765302	0.721476	0.76474	0.784179	0.775863	0.765885	0.777296
6	18	169	0.808132	0.78775	0.808311	0.764434	0.769179	0.781245	0.785684	0.795684	0.763745	0.799	0.776934	0.786245	0.745863	0.763129	0.700047	0.735302	0.77349	0.772674	0.655915	0.780863	0.796806	0.793618	0.770184	0.718831
6	19	170	0.807571	0.799	0.719995	0.778745	0.645608	0.785122	0.796372	0.794052	0.754561	0.795811	0.713618	0.747495	0.763236	0.774052	0.74349	0.652344	0.763363	0.750481	0.698618	0.776858	0.786679	0.780556	0.755801	0.765461
6	20	171	0.818693	0.78775	0.684179	0.784434	0.672113	0.784868	0.77099	0.790302	0.771372	0.776934	0.778872	0.787495	0.764613	0.76224	0.760302	0.679613	0.75492	0.756297	0.711806	0.73742	0.78099	0.790429	0.759392	0.673799
6	21	172	0.804127	0.797189	0.751882	0.764995	0.665787	0.794868	0.793184	0.794868	0.773056	0.729434	0.7915	0.794179	0.766552	0.76099	0.738236	0.70974	0.75742	0.765174	0.762368	0.76849	0.773363	0.773924	0.76506	0.705481
6	22	173	0.794434	0.804561	0.762443	0.745174	0.779561	0.791679	0.793872	0.772368	0.788184	0.714306	0.771627	0.802929	0.74849	0.746679	0.753924	0.722368	0.770302	0.767802	0.76224	0.749306	0.773924	0.787368	0.768343	0.697045
6	23	174	0.792316	0.77849	0.768566	0.777495	0.773056	0.778872	0.781245	0.682368	0.787929	0.7515	0.689486	0.812061	0.72941	0.741679	0.757113	0.741552	0.75599	0.761986	0.776679	0.773056	0.780429	0.766297	0.761708	0.717192
6	24	175	0.771193	0.791245	0.772443	0.788184	0.781372	0.765684	0.783872	0.746372	0.796245	0.727061	0.730684	0.788184	0.719358	0.752929	0.762802	0.722113	0.751552	0.758797	0.772802	0.765429	0.786679	0.755481	0.763204	0.694349
6	25	176	0.813693	0.789306	0.795505	0.774868	0.791245	0.703311	0.792622	0.783056	0.798184	0.76525	0.784	0.783184	0.751986	0.752703	0.76849	0.767802	0.750302	0.765863	0.77224	0.760429	0.77224	0.763108	0.772699	0.713418
6	26	177	0.795377	0.780122	0.809816	0.783056	0.793184	0.778184	0.787622	0.779868	0.803056	0.709179	0.782622	0.790302	0.756297	0.748539	0.750302	0.765863	0.752802	0.751297	0.775174	0.774868	0.794868	0.766424	0.774037	0.701457
6	27	178	0.797316	0.789255	0.807316	0.793872	0.787622	0.794995	0.789995	0.763745	0.800429	0.763872	0.784434	0.773363	0.751424	0.744517	0.760736	0.769613	0.737929	0.767802	0.741858	0.76974	0.776118	0.759231	0.773872	0.721469
6	28	179	0.773693	0.788669	0.818005	0.797622	0.786245	0.797622	0.785556	0.787495	0.792929	0.779434	0.813872	0.795556	0.759486	0.754052	0.763363	0.757674	0.729306	0.75724	0.758363	0.776424	0.780429	0.750915	0.777452	0.647736
6	29	180	0.783132	0.800377	0.808005	0.759995	0.780556	0.789434	0.678056	0.777368	0.817495	0.790684	0.810122	0.800556	0.76224	0.749486	0.734179	0.755736	0.737929	0.755863	0.76099	0.778363	0.763924	0.728033	0.769206	0.771544
6	30	181	0.792443	0.78275	0.798132	0.721372	0.773745	0.784868	0.71025	0.77849	0.795811	0.791118	0.799561	0.796934	0.756552	0.757674	0.726118	0.761986	0.774052	0.754613	0.76474	0.77099	0.742547	0.689462	0.764737	0.769558
7	1	182	0.798566	0.798439	0.784943	0.772368	0.788184	0.781806	0.7815	0.792929	0.798056	0.778184	0.765684	0.792495	0.778618	0.762113	0.69599	0.728108	0.762674	0.76599	0.75849	0.726297	0.779306	0.609259	0.763636	0.693883
7	2	183	0.789255	0.804561	0.805632	0.786679	0.787622	0.780684	0.740811	0.794306	0.787368	0.788618	0.807622	0.800556	0.759613	0.769052	0.648976	0.73224	0.771552	0.776552	0.759613	0.711245	0.781806	0.721476	0.768447	0.693069
7	3	184	0.764689	0.808872	0.781193	0.791679	0.787622	0.772061	0.759434	0.78224	0.780429	0.783056	0.808184	0.801806	0.767802	0.769091	0.65867	0.74349	0.761552	0.76849	0.756297	0.76599	0.779868	0.764052	0.770753	0.668761
7	4	185	0.789689	0.808439	0.764382	0.772929	0.779434	0.799434	0.778745	0.774613	0.799179	0.789995	0.789561	0.791806	0.763363	0.761986	0.696552	0.750302	0.767674	0.765736	0.764486	0.774613	0.767929	0.767929	0.773581	0.692928
7	5	186	0.811806	0.80025	0.773821	0.780429	0.777495	0.792495	0.775122	0.772368	0.799995	0.782929	0.808184	0.816245	0.762113	0.76724	0.73974	0.764052	0.765174	0.773924	0.760767	0.772674	0.769052	0.751603	0.778067	0.655312
7	6	187	0.828005	0.807061	0.780632	0.775302	0.774434	0.799995	0.75525	0.783056	0.794434	0.782495	0.815811	0.802495	0.763236	0.76349	0.728797	0.767674	0.748924	0.774052	0.758924	0.775047	0.764052	0.733849	0.776228	0.765681
7	7	188	0.835071	0.785811	0.796321	0.78224	0.783184	0.796934	0.774561	0.794868	0.764561	0.784179	0.793311	0.793618	0.760608	0.766552	0.755302	0.758363	0.755174	0.766424	0.779613	0.75849	0.774052	0.728033	0.776694	0.736938
7	8	189	0.809255	0.797495	0.781882	0.772368	0.775429	0.789995	0.786934	0.801245	0.772622	0.769995	0.728745	0.808184	0.765174	0.775429	0.736986	0.769179	0.754613	0.761986	0.768924	0.74099	0.77974	0.733287	0.771839	0.759695
7	9	190	0.7965	0.79775	0.773132	0.759995	0.774868	0.782929	0.790556	0.791245	0.779434	0.760122	0.8115	0.810122	0.760736	0.76474	0.755174	0.763363	0.765174	0.753108	0.75349	0.73849	0.777802	0.755608	0.773447	0.695459
7	10	191	0.788566	0.804127	0.818005	0.783745	0.769179	0.79525	0.77275	0.797368	0.794995	0.779561	0.815939	0.815811	0.764868	0.753924	0.762929	0.758236	0.762674	0.769486	0.758363	0.74724	0.775429	0.758542	0.779408	0.737591
7	11	192	0.797316	0.8015	0.823132	0.785556	0.781806	0.785684	0.773745	0.795556	0.799995	0.783745	0.8065	0.808745	0.761118	0.751424	0.74724	0.761986	0.769613	0.772674	0.74974	0.764052	0.771552	0.755353	0.779456	0.721957
7	12	193	0.780377	0.8015	0.813821	0.784306	0.789995	0.784868	0.787495	0.798745	0.789306	0.787495	0.810122	0.801679	0.759613	0.760863	0.75974	0.765047	0.770863	0.768236	0.735429	0.763363	0.757547	0.761297	0.778714	0.732889
7	13	194	0.793566	0.797189	0.806882	0.781806	0.786372	0.779052	0.789995	0.793618	0.786679	0.787622	0.814179	0.79099	0.754613	0.769052	0.751118	0.766424	0.75492	0.758363	0.739179	0.764613	0.750863	0.761858	0.776316	0.747561
7	14	195	0.805505	0.795811	0.819382	0.793618	0.793311	0.792929	0.792495	0.790863	0.795429	0.788184	0.806806	0.836118	0.763363	0.766552	0.756552	0.770863	0.760608	0.760341	0.771552	0.769613	0.777113	0.776858	0.78563	0.699742
7	15	196	0.794816	0.798311	0.814255	0.795556	0.788311	0.798056	0.750047	0.785863	0.796245	0.780122	0.796806	0.782061	0.766552	0.773363	0.750302	0.768363	0.759486	0.764179	0.775302	0.773363	0.767674	0.765629	0.779303	0.711751
7	16	197	0.809816	0.803311	0.801882	0.798056	0.789434	0.790556	0.765122	0.77599	0.801934	0.707368	0.801372	0.810684	0.749052	0.759486	0.747929	0.770736	0.745047	0.765302	0.778363	0.777929	0.762802	0.762802	0.776135	0.702154
7	17	198	0.807316	0.795505	0.804943	0.794995	0.778184	0.790556	0.751372	0.773872	0.801806	0.631273	0.800556	0.815939	0.761552	0.732674	0.763618	0.75742	0.748236	0.760905	0.775174	0.764868	0.761986	0.750736	0.769249	0.68407
7	18	199	0.813132	0.817877	0.808693	0.782929	0.782622	0.781245	0.767622	0.788745	0.797495	0.673415	0.804179	0.811934	0.755174	0.755047	0.779995	0.755353	0.762113	0.754091	0.762113	0.766679	0.771858	0.794179	0.776659	0.669867
7	19	200	0.811321	0.789561	0.808132	0.784306	0.791245	0.779306	0.740684	0.792495	0.794995	0.707802	0.796118	0.807495	0.761986	0.759379	0.771043	0.736424	0.751297	0.745905	0.768924	0.757113	0.758797	0.770047	0.772017	0.708519
7	20	201	0.814382	0.8015	0.798005	0.792622	0.771934	0.770122	0.780811	0.778184	0.788618	0.773311	0.804306	0.808056	0.750047	0.757113	0.729231	0.758363	0.753236	0.762368	0.746986	0.742802	0.768363	0.746221	0.772572	0.728536
7	21	202	0.808821	0.789127	0.793821	0.782368	0.787061	0.794	0.777368	0.796934	0.79099	0.791806	0.804995	0.787368	0.756858	0.755047	0.768363	0.756986	0.748108	0.765341	0.763797	0.75849	0.77724	0.721962	0.77622	0.669483
7	22	203	0.815071	0.771066	0.800071	0.793393	0.787622	0.796066	0.774434	0.799306	0.801118	0.791245	0.813745	0.792368	0.751858	0.760174	0.731986	0.753363	0.755174	0.764655	0.739486	0.770302	0.746552	0.688698	0.772625	0.675015
7	23	204	0.807443	0.790811	0.798132	0.785811	0.789306	0.785505	0.771372	0.792929	0.805556	0.790684	0.811245	0.792495	0.75242	0.758953	0.763056	0.754613	0.765863	0.767155	0.765302	0.76849	0.773236	0.726094	0.778021	0.678472
7	24	205	0.824382	0.795939	0.807571	0.786934	0.709613	0.768693	0.785122	0.787929	0.804434	0.795811	0.808872	0.805684	0.747981	0.761552	0.76849	0.750174	0.765736	0.762979	0.740174	0.757113	0.773797	0.752037	0.775501	0.681487
7	25	206	0.825632	0.8065	0.798	0.778056	0.706806	0.798132	0.772368	0.803056	0.795122	0.789561	0.811245	0.786245	0.750736	0.764052	0.776679	0.747113	0.759486	0.750755	0.744613	0.765302	0.76867	0.760174	0.775377	0.686832
7	26	207	0.823005	0.818566	0.803259	0.783056	0.769306	0.789943	0.793311	0.804995	0.804995	0.794561	0.786118	0.789868	0.765174	0.764179	0.768543	0.731552	0.751986	0.756591	0.762802	0.767802	0.761424	0.71015	0.777327	0.67525
7	27	208	0.814382	0.814816	0.796882	0.788184	0.773184	0.793821	0.797622	0.799306	0.796806	0.793311	0.790684	0.793745	0.762674	0.759179	0.742292	0.75099	0.75617	0.767979	0.772113	0.772113	0.754613	0.725405	0.778012	0.691759
7	28	209	0.803821	0.806372	0.801193	0.804561	0.783872	0.798005	0.799561	0.799995	0.787929	0.795939	0.810122	0.796934	0.744613	0.77099	0.759016	0.71724	0.765302	0.774229	0.772802	0.748108	0.753797	0.753415	0.779446	0.685484
7	29	210	0.811882	0.793439	0.80675	0.792622	0.777189	0.789382	0.783872	0.797495	0.773618	0.7365	0.813311	0.707368	0.747113	0.767929	0.756181	0.679486	0.761986	0.770341	0.769179	0.744613	0.766424	0.75367	0.768198	0.73342
7	30	211	0.811882	0.801627	0.8055	0.809434	0.774561	0.799382	0.79775	0.801118	0.771118	0.775122	0.809561	0.787495	0.751679	0.766118	0.754505	0.724179	0.761424	0.75617	0.769613	0.74849	0.775863	0.772929	0.778433	0.671301
7	31	212	0.817571	0.805377	0.801193	0.791934	0.76275	0.818821	0.795122	0.798363	0.791245	0.794995	0.798311	0.796245	0.75599	0.762929	0.753439	0.741424	0.763924	0.762703	0.76349	0.770302	0.767674	0.777802	0.781437	0.632091
8	1	213	0.806882	0.795939	0.779943	0.781679	0.780684	0.818821	0.787495	0.805429	0.794868	0.795811	0.804561	0.794995	0.793745	0.76474	0.722547	0.761424	0.777841	0.764868	0.754995	0.800556	0.777674	0.761424	0.783042	0.625102
8	2	214	0.815071	0.814816	0.737061	0.786245	0.755736	0.808821	0.781245	0.790556	0.803745	0.796245	0.806372	0.788184	0.751424	0.757802	0.756934	0.760302	0.772703	0.754995	0.732802	0.762674	0.777802	0.773618	0.776598	0.713448
8	3	215	0.812571	0.802189	0.684561	0.788872	0.774995	0.820632	0.793184	0.785122	0.805122	0.788745	0.808311	0.784995	0.76724	0.748363	0.716858	0.750863	0.753797	0.731245	0.767674	0.765047	0.775863	0.760608	0.77213	0.661205
8	4	216	0.803821	0.805939	0.702495	0.794434	0.789	0.820071	0.785122	0.777622	0.81525	0.786118	0.801679	0.765684	0.771552	0.754486	0.755302	0.745863	0.760736	0.723618	0.762674	0.757674	0.772547	0.763797	0.773431	0.630157
8	5	217	0.79175	0.8065	0.768	0.791118	0.788745	0.816321	0.792061	0.801934	0.809434	0.787929	0.801245	0.805811	0.757802	0.750481	0.75349	0.729613	0.758363	0.76099	0.777802	0.762802	0.769613	0.755047	0.778948	0.675575
8	6	218	0.768821	0.799127	0.7905	0.796806	0.773056	0.8105	0.793745	0.789179	0.791245	0.787929	0.803745	0.806806	0.753363	0.743363	0.75099	0.735302	0.754655	0.761297	0.772981	0.75349	0.770047	0.711528	0.773567	0.658337
8	7	219	0.753821	0.788439	0.803821	0.790122	0.775122	0.7905	0.797622	0.77349	0.802368	0.774179	0.801372	0.808618	0.740429	0.751552	0.759868	0.760863	0.767802	0.748108	0.762547	0.758745	0.766424	0.685584	0.770973	0.667123
8	8	220	0.699382	0.797877	0.806882	0.804434	0.777113	0.820632	0.794306	0.781118	0.802368	0.779995	0.803184	0.802495	0.740863	0.745863	0.717981	0.74849	0.755608	0.769179	0.74992	0.743745	0.758924	0.707089	0.76852	0.668639
8	9	221	0.7605	0.797061	0.796882	0.791372	0.777929	0.822571	0.791372	0.798745	0.786245	0.790684	0.808184	0.799561	0.753363	0.754613	0.747802	0.74724	0.766424	0.761986	0.768236	0.772929	0.752929	0.746603	0.776965	0.672589
8	10	222	0.789943	0.799127	0.808821	0.7865	0.782622	0.815632	0.800684	0.799306	0.802622	0.791372	0.808745	0.732495	0.749052	0.763363	0.752802	0.752802	0.761424	0.758108	0.780863	0.779052	0.756679	0.742037	0.777911	0.635623
8	11	223	0.807571	0.806193	0.803821	0.794434	0.786372	0.792316	0.785302	0.793745	0.804995	0.791934	0.806245	0.718056	0.76224	0.763236	0.753363	0.770863	0.756424	0.75117	0.770608	0.759613	0.758618	0.70783	0.77477	0.692284
8	12	224	0.799382	0.799127	0.813821	0.794434	0.756372	0.800071	0.763184	0.788184	0.804434	0.803311	0.812495	0.735122	0.754052	0.744792	0.752674	0.762674	0.767674	0.761986	0.763236	0.76599	0.75224	0.737599	0.774221	0.676057
8	13	225	0.8005	0.803439	0.81175	0.793184	0.779434	0.795071	0.767061	0.782495	0.798745	0.786934	0.815556	0.778872	0.76099	0.732113	0.728236	0.766552	0.762802	0.762113	0.77099	0.765174	0.742802	0.772802	0.776255	0.667333
8	14	226	0.785071	0.804127	0.812571	0.780684	0.777674	0.777571	0.784561	0.788745	0.800556	0.793872	0.811372	0.786934	0.76474	0.750863	0.746424	0.75349	0.76849	0.76349	0.76599	0.758924	0.76724	0.782929	0.778469	0.712442
8	15	227	0.807443	0.812877	0.77675	0.788311	0.770556	0.755071	0.788056	0.788745	0.795122	0.798311	0.812061	0.801372	0.749613	0.755302	0.752674	0.75474	0.77099	0.767674	0.774613	0.77599	0.777929	0.765736	0.779088	0.690976
8	16	228	0.786321	0.805377	0.761321	0.785122	0.792368	0.766321	0.781245	0.800556	0.804561	0.788872	0.792622	0.801934	0.74849	0.761552	0.739052	0.752802	0.765863	0.766118	0.769792	0.763363	0.779179	0.758797	0.775983	0.616909
8	17	229	0.778	0.813005	0.805071	0.778618	0.778618	0.802571	0.790684	0.788745	0.790811	0.791934	0.802189	0.799995	0.742802	0.751424	0.73849	0.747113	0.807495	0.74599	0.764231	0.757113	0.776552	0.755353	0.777582	0.698461
8	18	230	0.786321	0.802443	0.812571	0.769179	0.816245	0.803821	0.778184	0.785556	0.788311	0.783745	0.799127	0.805122	0.745174	0.741424	0.736552	0.748363	0.74242	0.76349	0.764179	0.767802	0.770302	0.760047	0.775926	0.677407
8	19	231	0.820505	0.788693	0.809943	0.790122	0.794689	0.79175	0.797622	0.789995	0.800684	0.786245	0.798439	0.803872	0.75724	0.738924	0.73849	0.73849	0.763236	0.762368	0.774179	0.751424	0.76474	0.750608	0.77783	0.668087
8	20	232	0.817443	0.806627	0.811321	0.779995	0.792622	0.812571	0.786372	0.796245	0.768311	0.794306	0.788005	0.778872	0.744179	0.75224	0.72224	0.747802	0.738924	0.766552	0.773618	0.754179	0.77224	0.737981	0.774666	0.74266
8	21	233	0.813693	0.803005	0.80425	0.785122	0.786934	0.818005	0.780684	0.790684	0.785122	0.782622	0.7865	0.737495	0.73974	0.73849	0.671986	0.759052	0.76599	0.755863	0.765429	0.751679	0.77724	0.738236	0.769901	0.723216
8	22	234	0.817443	0.802877	0.79175	0.775811	0.786372	0.807443	0.788184	0.784561	0.793184	0.795811	0.788184	0.757061	0.733618	0.737802	0.725429	0.765863	0.77224	0.753363	0.754868	0.75349	0.78224	0.724537	0.77237	0.718185
8	23	235	0.822571	0.807316	0.818821	0.783872	0.790811	0.796321	0.793184	0.794995	0.785684	0.754561	0.792061	0.758872	0.72099	0.739052	0.73224	0.762113	0.759052	0.76099	0.763056	0.757802	0.77974	0.686273	0.770926	0.729479
8	24	236	0.821321	0.766627	0.815632	0.783184	0.775811	0.795632	0.794561	0.795556	0.791372	0.716372	0.796118	0.767061	0.737674	0.739052	0.735302	0.772802	0.770429	0.78099	0.754868	0.775429	0.784179	0.687217	0.770781	0.649032
8	25	237	0.821321	0.793311	0.808821	0.792622	0.768872	0.814382	0.77275	0.784306	0.7865	0.75775	0.801066	0.797495	0.738924	0.74974	0.752113	0.764179	0.763056	0.747368	0.75599	0.775429	0.781118	0.741297	0.775837	0.716508
8	26	238	0.823821	0.754943	0.791066	0.788184	0.767061	0.808005	0.767622	0.768745	0.799434	0.77275	0.785505	0.797622	0.749613	0.739179	0.759179	0.764179	0.770429	0.70849	0.779868	0.771245	0.780429	0.777368	0.773852	0.704226
8	27	239	0.818821	0.741755	0.806321	0.767061	0.7415	0.820632	0.790122	0.774868	0.788745	0.785684	0.768693	0.773184	0.73224	0.74474	0.752929	0.76474	0.77599	0.731245	0.770429	0.76099	0.76099	0.76474	0.769837	0.703668
8	28	240	0.830632	0.718872	0.714255	0.790684	0.728311	0.821882	0.786934	0.789306	0.793745	0.792061	0.800811	0.783311	0.738363	0.757113	0.75599	0.772929	0.76224	0.737368	0.768618	0.764613	0.776118	0.72941	0.768798	0.641968
8	29	241	0.823821	0.719127	0.738	0.781245	0.761118	0.813821	0.780556	0.792622	0.785429	0.767061	0.798439	0.796372	0.757113	0.75599	0.729868	0.77349	0.764052	0.733056	0.760556	0.758236	0.766245	0.766424	0.769211	0.686054
8	30	242	0.824382	0.753693	0.768	0.780429	0.780684	0.815632	0.798311	0.751372	0.778872	0.79025	0.797622	0.807622	0.760302	0.740736	0.734179	0.781118	0.765905	0.72474	0.769306	0.763363	0.769434	0.774052	0.774091	0.682176
8	31	243	0.826882	0.796066	0.733005	0.768056	0.780684	0.816882	0.797622	0.704179	0.795684	0.775684	0.788184	0.801934	0.735174	0.748363	0.718363	0.77974	0.771043	0.742553	0.77974	0.766679	0.782368	0.733415	0.770105	0.681564
9	1	244	0.806321	0.794	0.732877	0.780939	0.773184	0.820632	0.785811	0.769868	0.771245	0.784	0.783872	0.808872	0.74867	0.750302	0.73349	0.762802	0.771679	0.759868	0.75849	0.770429	0.765556	0.736042	0.771316	0.709244
9	2	245	0.810071	0.792316	0.772189	0.779127	0.778872	0.818693	0.798311	0.789306	0.766934	0.794561	0.788872	0.796245	0.763363	0.753363	0.740429	0.762929	0.762113	0.764868	0.759613	0.761679	0.777929	0.734665	0.775748	0.698188
9	3	246	0.762571	0.792877	0.794	0.788872	0.786934	0.813693	0.79275	0.794306	0.775684	0.7965	0.792877	0.790939	0.744052	0.752802	0.733618	0.756424	0.752113	0.76974	0.772674	0.808618	0.780429	0.760736	0.777873	0.708043
9	4	247	0.725071	0.802877	0.800377	0.785811	0.788745	0.811066	0.784561	0.7465	0.776372	0.79275	0.792316	0.783311	0.752113	0.761806	0.732368	0.734613	0.770302	0.766679	0.750302	0.759995	0.776118	0.765429	0.770886	0.675319
9	5	248	0.790071	0.795377	0.802877	0.766806	0.787061	0.823745	0.785811	0.69474	0.736934	0.788311	0.793566	0.801372	0.757802	0.733056	0.713363	0.694486	0.76724	0.755429	0.774179	0.77974	0.783363	0.740863	0.766645	0.674885
9	6	249	0.789943	0.797316	0.796934	0.771806	0.780122	0.720684	0.679306	0.686806	0.776372	0.787622	0.789255	0.805122	0.755863	0.724306	0.762802	0.715479	0.756552	0.747495	0.769868	0.761424	0.730481	0.76599	0.757798	0.6504
9	7	250	0.813	0.781193	0.769052	0.794306	0.786372	0.698056	0.693872	0.750122	0.724306	0.790811	0.784816	0.801245	0.750863	0.742113	0.759052	0.713681	0.752113	0.758311	0.773618	0.800429	0.760429	0.770174	0.762179	0.656468
9	8	251	0.77425	0.791193	0.776627	0.775429	0.778872	0.727877	0.734689	0.776372	0.762622	0.767674	0.789689	0.800556	0.740302	0.754613	0.756552	0.699367	0.751552	0.705556	0.757368	0.718056	0.773745	0.710405	0.755608	0.709647
9	9	252	0.788	0.789816	0.780377	0.789995	0.780684	0.785377	0.753618	0.745939	0.783311	0.770556	0.794561	0.789306	0.74724	0.755174	0.739179	0.691552	0.755863	0.723056	0.776679	0.723745	0.752929	0.714155	0.760505	0.695673
9	10	253	0.78675	0.800505	0.749127	0.785811	0.789	0.796755	0.763184	0.741934	0.765377	0.765122	0.793311	0.794995	0.760302	0.746679	0.731679	0.715684	0.746424	0.739434	0.776118	0.756867	0.752495	0.714103	0.762348	0.660711
9	11	254	0.800071	0.799127	0.769816	0.78275	0.754995	0.818566	0.682802	0.767622	0.789995	0.775939	0.780939	0.797622	0.75974	0.717293	0.746118	0.732368	0.75974	0.735684	0.783618	0.764052	0.748184	0.73992	0.763953	0.707232
9	12	255	0.805071	0.852316	0.782061	0.779561	0.779306	0.804	0.646476	0.761934	0.765811	0.778311	0.775811	0.838311	0.755174	0.736552	0.743363	0.727368	0.76474	0.749868	0.75849	0.779868	0.720556	0.713721	0.764485	0.694864
9	13	256	0.809943	0.802316	0.79275	0.788311	0.773872	0.803184	0.710811	0.736372	0.725684	0.782061	0.787189	0.800684	0.729358	0.749052	0.738363	0.729306	0.766679	0.745429	0.760302	0.782929	0.734179	0.732853	0.762801	0.652498
9	14	257	0.81425	0.823566	0.800122	0.794561	0.7865	0.800377	0.739561	0.779561	0.754	0.759127	0.799	0.818184	0.734613	0.759052	0.736552	0.726118	0.76224	0.756806	0.769052	0.784306	0.762113	0.730736	0.772291	0.655514
9	15	258	0.8155	0.807877	0.799816	0.775684	0.766934	0.819255	0.748439	0.786245	0.7265	0.726627	0.787877	0.800122	0.744179	0.765302	0.743618	0.758924	0.74849	0.741806	0.782368	0.773745	0.749868	0.664641	0.765173	0.69993
9	16	259	0.813821	0.786882	0.799816	0.774	0.780939	0.799255	0.779434	0.7915	0.72775	0.763872	0.795811	0.772368	0.754179	0.764179	0.74224	0.750863	0.76724	0.754306	0.770122	0.804306	0.768184	0.72191	0.771954	0.671645
9	17	260	0.808132	0.758693	0.7965	0.780939	0.762061	0.796372	0.789	0.788872	0.685811	0.708872	0.792622	0.709179	0.752802	0.764179	0.76724	0.773108	0.750302	0.761679	0.745684	0.783618	0.750122	0.742113	0.762177	0.734377
9	18	261	0.788821	0.776882	0.778566	0.78775	0.765556	0.708056	0.759689	0.79025	0.69775	0.715377	0.776118	0.731118	0.74724	0.760429	0.772495	0.766858	0.778363	0.765556	0.736245	0.766679	0.715939	0.727674	0.755155	0.678753
9	19	262	0.806882	0.809816	0.782316	0.783311	0.688056	0.707189	0.747877	0.789434	0.774	0.759	0.776934	0.777061	0.754868	0.75474	0.769367	0.802368	0.76224	0.754868	0.763618	0.791245	0.750684	0.709486	0.764334	0.650065
9	20	263	0.786882	0.815377	0.764816	0.792189	0.727189	0.685122	0.734689	0.797622	0.773745	0.78525	0.795122	0.778311	0.748618	0.752113	0.769931	0.774306	0.754995	0.754306	0.793184	0.785429	0.773056	0.734231	0.767113	0.687539
9	21	264	0.785071	0.799255	0.754255	0.792189	0.724561	0.667547	0.75275	0.785684	0.772929	0.772877	0.80025	0.776806	0.733745	0.76099	0.713108	0.784868	0.743056	0.779306	0.766679	0.785429	0.776806	0.69765	0.760264	0.712695
9	22	265	0.796882	0.762443	0.682929	0.776627	0.718872	0.686118	0.795684	0.770556	0.825556	0.778311	0.795684	0.751245	0.746679	0.76599	0.75474	0.774505	0.736679	0.786934	0.775863	0.746986	0.771118	0.614641	0.755229	0.716179
9	23	266	0.826882	0.740632	0.767316	0.788566	0.775811	0.691245	0.790122	0.789434	0.793311	0.799	0.779995	0.71474	0.738618	0.754613	0.748056	0.753745	0.757802	0.770122	0.751424	0.740302	0.773056	0.701731	0.761206	0.729114
9	24	267	0.783	0.763132	0.784561	0.7865	0.785377	0.779255	0.775377	0.778745	0.779995	0.780122	0.787929	0.738184	0.730556	0.767368	0.741118	0.748056	0.756858	0.777553	0.651603	0.772622	0.763872	0.725047	0.761674	0.727171
9	25	268	0.755632	0.791882	0.79525	0.790939	0.795939	0.796066	0.78525	0.779052	0.8315	0.752495	0.785811	0.733872	0.737368	0.732368	0.761118	0.741552	0.73599	0.773056	0.658363	0.765684	0.764995	0.767368	0.76507	0.665469
9	26	269	0.76175	0.765632	0.773311	0.795939	0.804689	0.794255	0.781627	0.767622	0.788566	0.7615	0.779689	0.742495	0.751118	0.726245	0.767929	0.758618	0.718618	0.779306	0.717495	0.777802	0.776806	0.760736	0.765988	0.722983
9	27	270	0.7655	0.743821	0.764127	0.798311	0.79275	0.789816	0.801627	0.777061	0.784	0.769127	0.76525	0.754434	0.74974	0.728618	0.758745	0.774868	0.785429	0.779306	0.734306	0.750429	0.735122	0.764613	0.766682	0.713232
9	28	271	0.742571	0.746321	0.791372	0.776934	0.784434	0.801755	0.782877	0.797061	0.786627	0.754689	0.723056	0.616783	0.754179	0.726806	0.728184	0.774179	0.78349	0.782929	0.741245	0.774868	0.766245	0.753108	0.758623	0.737757
9	29	272	0.772571	0.729943	0.812877	0.759306	0.780377	0.792877	0.772877	0.81525	0.809561	0.783872	0.795122	0.696858	0.76224	0.741118	0.694868	0.764868	0.715099	0.803311	0.736806	0.769306	0.771934	0.718849	0.763631	0.63624
9	30	273	0.776627	0.707061	0.777877	0.735122	0.761755	0.795939	0.79025	0.783439	0.775429	0.780939	0.756245	0.735122	0.760302	0.720429	0.750684	0.775556	0.659231	0.77224	0.740811	0.789995	0.793872	0.745736	0.758394	0.766773
10	1	274	0.696806	0.784255	0.770505	0.712061	0.791066	0.800939	0.799561	0.765811	0.815811	0.766627	0.747495	0.726934	0.754486	0.643976	0.741245	0.776679	0.700863	0.772622	0.707622	0.769052	0.742929	0.759613	0.752134	0.72808
10	2	275	0.749943	0.821627	0.739	0.747189	0.783184	0.800505	0.784052	0.793439	0.784	0.728439	0.759689	0.706245	0.76099	0.716934	0.720556	0.788056	0.738184	0.770429	0.696806	0.750556	0.771245	0.758236	0.757696	0.69093
10	3	276	0.776882	0.810377	0.753005	0.731627	0.736245	0.759816	0.777189	0.797061	0.78525	0.731934	0.771372	0.717368	0.74974	0.718618	0.721424	0.781679	0.752495	0.779561	0.688056	0.724434	0.757495	0.748797	0.753201	0.776496
10	4	277	0.781193	0.809943	0.715122	0.74025	0.727189	0.774	0.755377	0.750939	0.755939	0.785684	0.799689	0.760556	0.71974	0.728056	0.746679	0.706042	0.761679	0.759995	0.712622	0.679434	0.759434	0.766552	0.749823	0.693711
10	5	278	0.789943	0.815071	0.714434	0.775684	0.7565	0.789816	0.686118	0.701245	0.76275	0.787061	0.789561	0.769306	0.723056	0.733618	0.751806	0.670608	0.773056	0.775556	0.76849	0.706245	0.739434	0.76849	0.752175	0.689182
10	6	279	0.801882	0.808693	0.730939	0.764868	0.74275	0.768693	0.772622	0.692189	0.757877	0.785377	0.772929	0.772368	0.706245	0.760429	0.796934	0.654103	0.779306	0.784306	0.784995	0.774434	0.712622	0.756731	0.758241	0.683836
10	7	280	0.778132	0.811193	0.77775	0.787061	0.781066	0.778005	0.789689	0.750377	0.769127	0.784561	0.7915	0.761934	0.713236	0.75599	0.760122	0.66492	0.765122	0.783056	0.765556	0.720069	0.734561	0.790429	0.764248	0.645557
10	8	281	0.712368	0.811193	0.808184	0.739689	0.777061	0.80525	0.768745	0.708311	0.78025	0.768439	0.791627	0.754434	0.799052	0.760302	0.768056	0.671297	0.752622	0.747495	0.771806	0.719995	0.729434	0.749486	0.758868	0.740717
10	9	282	0.615481	0.838132	0.783184	0.677113	0.776627	0.795632	0.774561	0.742316	0.79775	0.723745	0.788566	0.726372	0.76349	0.768618	0.772368	0.719434	0.739995	0.757495	0.776806	0.78349	0.784689	0.734613	0.756385	0.781885
10	10	283	0.691066	0.797443	0.844816	0.784689	0.767316	0.794255	0.775122	0.7165	0.787189	0.762061	0.761066	0.732495	0.73599	0.733056	0.766118	0.712495	0.771245	0.765122	0.775556	0.777495	0.746934	0.738236	0.760739	0.787315
10	11	284	0.730632	0.806755	0.804689	0.791627	0.735377	0.770377	0.754689	0.764127	0.778566	0.783439	0.768005	0.728184	0.745429	0.734306	0.799613	0.704868	0.757113	0.754689	0.788056	0.782495	0.759306	0.734665	0.762591	0.686309
10	12	285	0.702877	0.677368	0.778005	0.787316	0.741066	0.734816	0.730122	0.767622	0.782622	0.787877	0.749	0.729868	0.751118	0.736424	0.767061	0.744306	0.773745	0.723745	0.790684	0.716934	0.760556	0.675891	0.745865	0.794275
10	13	286	0.686118	0.742316	0.768311	0.721755	0.720939	0.730505	0.75775	0.759255	0.768872	0.784127	0.720811	0.758745	0.767929	0.738363	0.753311	0.750684	0.775684	0.759868	0.789306	0.723681	0.759995	0.689358	0.746713	0.733221
10	14	287	0.756372	0.771882	0.700429	0.794689	0.785811	0.743693	0.77025	0.78025	0.792189	0.800122	0.71599	0.774434	0.779179	0.761245	0.728745	0.68974	0.786118	0.772495	0.776181	0.714868	0.765122	0.684868	0.756576	0.702288
10	15	288	0.775377	0.794816	0.72849	0.787189	0.784434	0.747316	0.760377	0.780811	0.798618	0.792368	0.80599	0.741372	0.804868	0.732368	0.736372	0.743184	0.772495	0.762622	0.721934	0.728184	0.752622	0.688797	0.760937	0.680349
10	16	289	0.78025	0.792877	0.762877	0.781372	0.790377	0.782877	0.749816	0.816245	0.755811	0.655533	0.7965	0.705556	0.760302	0.75224	0.731934	0.764306	0.759995	0.739561	0.711372	0.704868	0.772061	0.706424	0.753325	0.754024
10	17	290	0.711934	0.805505	0.779689	0.777189	0.766193	0.793566	0.725377	0.782495	0.815811	0.662599	0.779816	0.744	0.759179	0.755302	0.726372	0.747622	0.779868	0.741627	0.701245	0.683363	0.77599	0.751424	0.753008	0.639271
10	18	291	0.729689	0.81275	0.793184	0.71525	0.730939	0.794816	0.728439	0.81525	0.763056	0.711118	0.785505	0.732189	0.751245	0.755047	0.734561	0.785429	0.774306	0.734561	0.737061	0.7865	0.719179	0.745736	0.756173	0.657418
10	19	292	0.779382	0.774943	0.778566	0.701245	0.747877	0.802316	0.738439	0.804995	0.739995	0.717495	0.759	0.683056	0.708363	0.676858	0.712622	0.760684	0.730226	0.730684	0.736372	0.716372	0.71599	0.784179	0.740894	0.727147
10	20	293	0.775632	0.803005	0.835377	0.739127	0.78775	0.805505	0.7865	0.739179	0.803184	0.731118	0.739561	0.692495	0.706552	0.717368	0.700302	0.722113	0.672165	0.762495	0.758872	0.694995	0.71349	0.783056	0.748629	0.698654
10	21	294	0.763693	0.804943	0.75525	0.734	0.67867	0.808693	0.743184	0.7315	0.777189	0.764	0.740377	0.786934	0.769434	0.718056	0.672853	0.706118	0.740684	0.786372	0.750122	0.728745	0.759052	0.745047	0.748405	0.718218		z-Test: Two Sample for Means	Alpha=0.01
10	22	295	0.761882	0.809943	0.770939	0.75775	0.716372	0.806882	0.747189	0.702495	0.785377	0.782316	0.794943	0.776372	0.765684	0.710556	0.733976	0.724306	0.754434	0.800122	0.728872	0.764868	0.759995	0.749052	0.759288	0.695404
10	23	296	0.756193	0.828821	0.768005	0.756245	0.740377	0.789943	0.739689	0.716934	0.751066	0.768566	0.775632	0.743311	0.770556	0.725556	0.773056	0.741934	0.729052	0.790302	0.767495	0.773872	0.726424	0.722929	0.757089	0.695621			Modified Snyder	FAO56-PM
10	24	297	0.762571	0.798439	0.786806	0.755556	0.733566	0.821193	0.715684	0.724561	0.753311	0.76775	0.779255	0.691679	0.753745	0.719995	0.754179	0.708797	0.762061	0.779517	0.769995	0.760122	0.779868	0.720429	0.754504	0.722193		Mean	0.767023	0.740266
10	25	298	0.795377	0.800505	0.791627	0.696552	0.732316	0.795377	0.713618	0.7415	0.777189	0.79525	0.768005	0.692368	0.761245	0.719306	0.789179	0.70224	0.789434	0.821372	0.748745	0.778184	0.823745	0.729179	0.761923	0.704315		Known Variance	7.2e-05	0.005545
10	26	299	0.798693	0.729255	0.791193	0.648236	0.776755	0.803872	0.703618	0.745377	0.791627	0.779	0.766627	0.717674	0.761118	0.729434	0.7915	0.740122	0.782495	0.785122	0.688681	0.766372	0.710787	0.73224	0.751809	0.736273		Observations	214	214
10	27	300	0.809943	0.751321	0.791066	0.715429	0.765377	0.721245	0.687802	0.756627	0.727547	0.752316	0.818439	0.783108	0.771806	0.647981	0.785684	0.737495	0.773255	0.750811	0.701806	0.761372	0.730684	0.726424	0.748525	0.721889		Hypothesized Mean Difference	0
10	28	301	0.859382	0.786066	0.795939	0.791118	0.758566	0.746372	0.714995	0.785377	0.736858	0.757189	0.804255	0.769434	0.755556	0.658415	0.789561	0.735811	0.753745	0.709486	0.713267	0.72099	0.733184	0.77599	0.756889	0.630709		z	5.22591
10	29	302	0.741806	0.719127	0.8265	0.783439	0.7715	0.653924	0.732113	0.724358	0.782622	0.777316	0.798005	0.798311	0.73492	0.644792	0.756372	0.732622	0.732929	0.741245	0.750556	0.803056	0.747061	0.773056	0.751165	0.70925		P(Z<=z) one-tail	8.66483e-08
10	30	303	0.796882	0.732316	0.773872	0.786627	0.638797	0.73275	0.790377	0.688415	0.819561	0.795122	0.798693	0.814689	0.726424	0.645915	0.744306	0.69474	0.785556	0.753184	0.777368	0.790122	0.734561	0.781118	0.754609	0.706783		z Critical one-tail	2.32635
10	31	304	0.803005	0.668797	0.735811	0.737316	0.710939	0.822622	0.762622	0.743311	0.779179	0.790505	0.783566	0.81525	0.69599	0.680047	0.742368	0.697929	0.788184	0.742293	0.753056	0.764995	0.742061	0.762674	0.751024	0.71285		P(Z<=z) two-tail	1.73297e-07
																								ymean=	0.767023	0.740266		z Critical two-tail	2.57583
																								var1	7.18559e-05
																								var2		0.00554491
MO	DAY	DOY	1998	1999	2000	2001	2002	2003	2004	2005	2006	2007	2008	2009	2010	2011	2012	2013	2014	2015	2016	2017	2018	2019	Kp-Wahed-Snyder	Kp-FAO56-PM
4	1	91	0.647242	0.668374	0.651541	0.610839	0.63906	0.639554	0.618091	0.624377	0.628469	0.654687	0.687465	0.663062	0.651977	0.581452	0.633661	0.580322	0.602929	0.642479	0.637516	0.634569	0.647686	0.677516	0.637403	0.927909
4	2	92	0.662605	0.666044	0.599768	0.691076	0.676608	0.624392	0.613771	0.656032	0.693107	0.663284	0.644067	0.638653	0.649717	0.609473	0.61242	0.63321	0.603158	0.661689	0.584627	0.654687	0.648136	0.672088	0.643573	0.869866
4	3	93	0.668476	0.679776	0.683174	0.647686	0.666445	0.632073	0.552751	0.666209	0.642944	0.640226	0.653114	0.647014	0.632087	0.62937	0.634798	0.672996	0.636186	0.666438	0.605647	0.642479	0.626888	0.675027	0.645537	0.885078
4	4	94	0.626666	0.702162	0.705101	0.662376	0.675027	0.615137	0.515897	0.633225	0.648358	0.632989	0.662147	0.654244	0.622368	0.664407	0.624797	0.651069	0.65875	0.658299	0.610167	0.643166	0.564051	0.647228	0.639892	0.892517
4	5	95	0.663291	0.674591	0.702828	0.661925	0.656947	0.612198	0.578527	0.619207	0.670958	0.651977	0.658971	0.679333	0.57852	0.657849	0.574908	0.660337	0.652199	0.618971	0.595927	0.60722	0.608815	0.6305	0.637091	0.850662
4	6	96	0.662612	0.641349	0.675042	0.658521	0.687679	0.604495	0.621468	0.604739	0.671645	0.658521	0.629141	0.641571	0.603601	0.659429	0.584849	0.663727	0.615137	0.630507	0.58304	0.580322	0.605196	0.633432	0.632546	0.902761
4	7	97	0.663971	0.699666	0.656719	0.649488	0.661246	0.649037	0.637072	0.628025	0.694924	0.654015	0.624385	0.636815	0.649259	0.638867	0.617169	0.646327	0.59886	0.61807	0.641127	0.639532	0.607006	0.635928	0.643069	0.881945
4	8	98	0.662161	0.687922	0.662819	0.644746	0.666438	0.617176	0.631201	0.576024	0.684532	0.644296	0.65197	0.656719	0.635241	0.650389	0.622819	0.63321	0.611726	0.660337	0.640455	0.658292	0.644746	0.633897	0.644414	0.822579
4	9	99	0.655381	0.683174	0.679998	0.672317	0.630278	0.637959	0.614688	0.604059	0.614451	0.656199	0.672317	0.660345	0.634347	0.649023	0.611511	0.639089	0.643858	0.605396	0.601349	0.625071	0.676837	0.624828	0.640567	0.839593
4	10	100	0.657191	0.689732	0.636844	0.665086	0.606555	0.646556	0.602264	0.630965	0.678196	0.669156	0.684983	0.645655	0.63389	0.641106	0.618971	0.654909	0.657169	0.64067	0.629813	0.610167	0.678639	0.631394	0.645905	0.906924
4	11	101	0.638202	0.689281	0.674362	0.646098	0.610846	0.625765	0.616954	0.610396	0.673905	0.658986	0.621917	0.653114	0.633875	0.620551	0.653779	0.642029	0.650618	0.620322	0.660559	0.58304	0.669835	0.654008	0.641293	0.889757
4	12	102	0.619665	0.720013	0.616947	0.639769	0.661475	0.624185	0.631194	0.609495	0.695375	0.657405	0.655374	0.666231	0.621209	0.594318	0.654008	0.644746	0.625758	0.58236	0.677516	0.572183	0.679555	0.651977	0.640943	0.938682
4	13	103	0.616954	0.677295	0.625965	0.657856	0.680234	0.652656	0.646334	0.585071	0.691763	0.640906	0.664421	0.610625	0.624399	0.620787	0.651748	0.624406	0.644739	0.608808	0.663695	0.637952	0.673676	0.602915	0.641055	0.843122
4	14	104	0.640241	0.671187	0.672989	0.663499	0.674134	0.686335	0.664414	0.6305	0.614687	0.632996	0.639332	0.633675	0.636607	0.621009	0.664636	0.647228	0.644067	0.614007	0.653557	0.674126	0.672095	0.601105	0.647838	0.830732
4	15	105	0.653572	0.668484	0.694702	0.646777	0.654916	0.704644	0.640448	0.645869	0.620773	0.653336	0.610396	0.658521	0.630056	0.616711	0.651076	0.637959	0.621917	0.615137	0.684969	0.694245	0.632316	0.638395	0.648874	0.814525
4	16	106	0.642617	0.665773	0.683618	0.663048	0.676615	0.679104	0.578512	0.679319	0.680227	0.626895	0.663499	0.676615	0.584391	0.640899	0.64632	0.65242	0.631859	0.58801	0.656947	0.668927	0.579657	0.680677	0.647543	0.946186
4	17	107	0.682709	0.667811	0.608815	0.652878	0.639769	0.669835	0.588246	0.672324	0.675249	0.632774	0.628697	0.687243	0.61581	0.610839	0.652656	0.649488	0.591622	0.642701	0.650847	0.658986	0.614916	0.643366	0.642617	0.827246
4	18	108	0.646785	0.665551	0.59479	0.647228	0.669599	0.660109	0.680005	0.675707	0.691305	0.63208	0.650404	0.639554	0.649259	0.595241	0.622368	0.662147	0.643602	0.652199	0.636157	0.643609	0.613335	0.6531	0.646551	0.897588
4	19	109	0.663506	0.680914	0.664843	0.64564	0.690397	0.626645	0.624185	0.648351	0.663284	0.602471	0.660345	0.63851	0.637058	0.63999	0.596792	0.671637	0.681128	0.66101	0.604967	0.646549	0.634347	0.642922	0.646613	0.873048
4	20	110	0.64971	0.681586	0.689489	0.658085	0.659207	0.669828	0.696276	0.638181	0.678432	0.63163	0.665995	0.63399	0.62146	0.627102	0.64903	0.671866	0.632309	0.642479	0.592309	0.652878	0.673897	0.628225	0.651998	0.849498
4	21	111	0.626659	0.674813	0.707361	0.655603	0.669385	0.67005	0.695382	0.643395	0.678646	0.631415	0.665995	0.632294	0.661231	0.632087	0.659207	0.664178	0.645869	0.650611	0.608129	0.660566	0.636836	0.564015	0.651533	0.8782
4	22	112	0.645655	0.636386	0.715271	0.611519	0.695596	0.663055	0.664414	0.672989	0.671645	0.623956	0.668712	0.645884	0.64067	0.689946	0.651069	0.654687	0.648809	0.606526	0.551621	0.610839	0.588232	0.551356	0.641311	0.906996
4	23	113	0.639783	0.651762	0.702391	0.630714	0.699895	0.670064	0.668927	0.656497	0.6192	0.616718	0.649052	0.657398	0.61355	0.669828	0.627117	0.651977	0.650618	0.605625	0.577168	0.593867	0.636379	0.560167	0.638577	0.900465
4	24	114	0.619443	0.641142	0.703971	0.621681	0.685426	0.61739	0.659436	0.642257	0.697856	0.554317	0.604746	0.666438	0.606319	0.663727	0.637509	0.632087	0.624177	0.616489	0.608586	0.588461	0.640906	0.597486	0.633175	0.912394
4	25	115	0.644081	0.616053	0.691541	0.631179	0.666896	0.691749	0.669842	0.663277	0.566762	0.602035	0.657863	0.661689	0.611068	0.640448	0.630729	0.60112	0.588461	0.625987	0.600112	0.621467	0.589369	0.596585	0.630378	0.830703
4	26	116	0.666195	0.629613	0.687701	0.646098	0.663727	0.662147	0.628476	0.657176	0.541673	0.610617	0.643395	0.670965	0.597501	0.644289	0.648129	0.594569	0.624163	0.5966	0.62937	0.606777	0.577161	0.61626	0.629209	0.867773
4	27	117	0.714814	0.651076	0.638653	0.651076	0.649495	0.596371	0.595677	0.670507	0.606777	0.609702	0.659887	0.668934	0.634119	0.622819	0.637737	0.591629	0.645869	0.608357	0.625751	0.57287	0.656726	0.621238	0.633186	0.859806
4	28	118	0.691763	0.655374	0.694474	0.578298	0.649266	0.628476	0.637065	0.675485	0.654695	0.640684	0.655596	0.654916	0.636364	0.605632	0.618527	0.57799	0.649259	0.597508	0.65084	0.58078	0.668247	0.599074	0.636378	0.790871
4	29	119	0.671201	0.673004	0.692442	0.589369	0.665766	0.658306	0.602486	0.647915	0.597951	0.663506	0.639096	0.665094	0.65129	0.637723	0.612198	0.585078	0.626194	0.608136	0.647228	0.624177	0.660116	0.600211	0.637204	0.786832
4	30	120	0.672782	0.658993	0.684082	0.580329	0.663055	0.652664	0.664636	0.675478	0.656711	0.649939	0.651305	0.674126	0.675027	0.64632	0.612198	0.588468	0.63434	0.641571	0.653557	0.630056	0.651755	0.597951	0.646152	0.758158
5	1	121	0.673461	0.650182	0.680241	0.618284	0.656275	0.605876	0.655145	0.684511	0.660559	0.658535	0.652656	0.679776	0.672996	0.65875	0.610617	0.603837	0.632309	0.635921	0.60677	0.608801	0.60044	0.628004	0.642452	0.90516
5	2	122	0.628032	0.643402	0.682051	0.555912	0.676615	0.568128	0.629599	0.642944	0.661696	0.656504	0.671645	0.647228	0.65423	0.639532	0.656947	0.578298	0.62982	0.64451	0.63841	0.644517	0.61174	0.615352	0.635323	0.854409
5	3	123	0.624192	0.662605	0.674591	0.618756	0.658986	0.595484	0.698986	0.616496	0.659665	0.626216	0.665086	0.652213	0.645411	0.651519	0.676157	0.607678	0.646777	0.665987	0.64858	0.662597	0.585521	0.630721	0.644283	0.735723
5	4	124	0.611755	0.654473	0.654687	0.626437	0.662147	0.593675	0.679326	0.597722	0.643845	0.626209	0.644975	0.646992	0.651519	0.646549	0.693164	0.630278	0.635027	0.640677	0.613986	0.655817	0.592309	0.616696	0.637194	0.907655
5	5	125	0.609716	0.638202	0.687007	0.637745	0.654687	0.604295	0.672095	0.622826	0.645197	0.649495	0.669156	0.615323	0.650389	0.6531	0.668698	0.631859	0.576932	0.624628	0.647671	0.663727	0.645869	0.631408	0.64091	0.821132
5	6	126	0.655832	0.634133	0.710072	0.640226	0.623956	0.611075	0.660802	0.685426	0.653786	0.613786	0.654466	0.696047	0.655138	0.655589	0.661467	0.628515	0.656046	0.620108	0.665987	0.66372	0.659658	0.571275	0.64896	0.774759
5	7	127	0.651991	0.672539	0.691091	0.656261	0.623956	0.524044	0.652435	0.670293	0.643166	0.591629	0.607685	0.677516	0.655589	0.656497	0.651297	0.628469	0.647006	0.607907	0.652649	0.641785	0.671187	0.607656	0.64012	0.818628
5	8	128	0.631873	0.632545	0.663291	0.695596	0.618756	0.552751	0.671637	0.653336	0.639311	0.639325	0.698536	0.667804	0.655138	0.625307	0.647907	0.635249	0.675478	0.594332	0.656046	0.66033	0.667797	0.599975	0.644651	0.779543
5	9	129	0.620344	0.678425	0.658092	0.687908	0.609037	0.568579	0.668705	0.655589	0.630957	0.668247	0.675035	0.658314	0.667346	0.634798	0.633446	0.644289	0.668469	0.641356	0.632996	0.657176	0.668927	0.614451	0.647386	0.885284
5	10	130	0.649946	0.664414	0.616961	0.693572	0.602486	0.568357	0.597722	0.658085	0.646556	0.661704	0.634569	0.642715	0.614909	0.631408	0.610152	0.642937	0.654237	0.628919	0.618077	0.599532	0.672095	0.625751	0.633414	0.852138
5	11	131	0.677745	0.651083	0.636171	0.715486	0.606326	0.578076	0.653085	0.617405	0.655596	0.697635	0.651076	0.647235	0.606991	0.64067	0.626209	0.660559	0.649717	0.651297	0.657849	0.648351	0.647907	0.636829	0.646059	0.750169
5	12	132	0.641807	0.642272	0.642501	0.661696	0.653853	0.592545	0.670507	0.616954	0.628025	0.670958	0.657184	0.638195	0.63547	0.62078	0.653779	0.668927	0.648809	0.630278	0.650389	0.644517	0.660337	0.604502	0.642468	0.857878
5	13	133	0.679326	0.664857	0.676172	0.637723	0.665086	0.598874	0.650389	0.651977	0.660116	0.677745	0.631194	0.637072	0.64632	0.656039	0.641127	0.641349	0.65197	0.644968	0.656039	0.639318	0.645869	0.586873	0.647291	0.858547
5	14	134	0.689954	0.682716	0.676172	0.638624	0.675256	0.622368	0.641807	0.632545	0.618306	0.670736	0.658085	0.617405	0.649488	0.659658	0.648358	0.647907	0.65242	0.645876	0.652656	0.642479	0.645419	0.579414	0.64762	0.843144
5	15	135	0.680234	0.670293	0.691091	0.688587	0.663055	0.658986	0.672317	0.611526	0.595026	0.657634	0.650847	0.625765	0.656046	0.649037	0.650389	0.642708	0.661017	0.632531	0.643616	0.632538	0.661017	0.576474	0.64867	0.826279
5	16	136	0.678863	0.678882	0.684082	0.684525	0.639096	0.652206	0.640005	0.672095	0.650618	0.638867	0.670958	0.649946	0.664414	0.633897	0.642701	0.646549	0.651977	0.654237	0.639997	0.637737	0.642937	0.566755	0.65097	0.856515
5	17	137	0.679562	0.681364	0.715944	0.631415	0.640234	0.607464	0.685434	0.637745	0.700567	0.679326	0.682494	0.633675	0.648587	0.583261	0.640677	0.657398	0.65084	0.640684	0.64677	0.613557	0.618527	0.602915	0.64902	0.813382
5	18	138	0.665086	0.666903	0.664872	0.615595	0.6705	0.604295	0.631401	0.594125	0.667575	0.700345	0.673454	0.631194	0.641578	0.588682	0.614	0.656268	0.622132	0.622375	0.630042	0.617176	0.597057	0.59499	0.634984	0.779761
5	19	139	0.678196	0.644754	0.670515	0.607685	0.668705	0.639776	0.657856	0.628476	0.645655	0.659894	0.688144	0.624177	0.639769	0.637051	0.631179	0.655138	0.6418	0.58123	0.63999	0.62824	0.591407	0.636829	0.640748	0.869613
5	20	140	0.669821	0.524716	0.681822	0.609266	0.674126	0.642715	0.617626	0.624635	0.664636	0.62304	0.683402	0.660566	0.647006	0.61513	0.63208	0.638188	0.63954	0.590942	0.63841	0.669821	0.613106	0.649259	0.636812	0.768444
5	21	141	0.666667	0.594583	0.683631	0.613335	0.653557	0.667346	0.609945	0.648365	0.665987	0.658077	0.673004	0.656497	0.642257	0.630721	0.654909	0.636379	0.640219	0.629148	0.655817	0.654459	0.620566	0.64067	0.645279	0.73818
5	22	142	0.691756	0.617412	0.681371	0.600455	0.653107	0.662597	0.659665	0.648587	0.670965	0.652435	0.682265	0.671645	0.622139	0.629599	0.647679	0.643609	0.623949	0.636822	0.646327	0.673897	0.650167	0.604495	0.648679	0.757685
5	23	143	0.693801	0.628934	0.683402	0.610174	0.668019	0.638417	0.658077	0.658528	0.666445	0.650847	0.665759	0.659436	0.634562	0.618978	0.64564	0.639997	0.615588	0.642243	0.638631	0.660109	0.605869	0.633217	0.646212	0.717349
5	24	144	0.670751	0.651305	0.680012	0.591179	0.645876	0.646334	0.646556	0.653786	0.608815	0.647915	0.677516	0.670057	0.62937	0.620108	0.628225	0.647006	0.6253	0.660337	0.634791	0.654909	0.65988	0.575344	0.642062	0.782728
5	25	145	0.663291	0.649252	0.671874	0.527212	0.645426	0.626659	0.647235	0.661017	0.576496	0.646105	0.686556	0.658757	0.632989	0.626659	0.633654	0.61016	0.62982	0.64451	0.632752	0.657627	0.655131	0.588439	0.635074	0.831865
5	26	146	0.650848	0.701246	0.648601	0.610625	0.612205	0.630049	0.639776	0.661696	0.659887	0.659436	0.673676	0.626437	0.640005	0.63321	0.638181	0.64067	0.652878	0.630714	0.645869	0.640448	0.633439	0.63389	0.643808	0.730991
5	27	147	0.631651	0.634812	0.643402	0.615145	0.644746	0.644746	0.653786	0.61129	0.657169	0.658986	0.670965	0.578749	0.606999	0.64858	0.647679	0.651519	0.661918	0.642708	0.638188	0.6531	0.632095	0.590935	0.637235	0.688312
5	28	148	0.656275	0.617412	0.644532	0.613786	0.651748	0.656497	0.656955	0.654459	0.658077	0.654909	0.646105	0.584399	0.645647	0.65242	0.653557	0.64067	0.641127	0.63321	0.661467	0.639318	0.620337	0.587102	0.639546	0.76193
5	29	149	0.676615	0.663735	0.679111	0.618978	0.658306	0.667354	0.659436	0.663048	0.630965	0.657634	0.665086	0.585078	0.654237	0.648129	0.626209	0.643838	0.645869	0.621445	0.659887	0.652878	0.626209	0.578276	0.644651	0.775264
5	30	150	0.678425	0.667117	0.673912	0.646777	0.641578	0.656025	0.649946	0.690397	0.654695	0.627796	0.578527	0.610846	0.635921	0.646777	0.612863	0.613328	0.652878	0.665987	0.669149	0.640219	0.665987	0.594332	0.644249	0.753812
5	31	151	0.692893	0.673454	0.659672	0.648816	0.640448	0.685197	0.681142	0.713905	0.630056	0.652649	0.6	0.615366	0.629827	0.645647	0.6366	0.62078	0.653051	0.656955	0.662369	0.65536	0.664636	0.616482	0.651605	0.700487
6	1	152	0.687243	0.677524	0.642272	0.590285	0.679097	0.663956	0.645419	0.692214	0.668927	0.658077	0.652435	0.632767	0.628712	0.635699	0.640219	0.643831	0.64564	0.618978	0.668247	0.655367	0.654687	0.604953	0.649389	0.774004
6	2	153	0.686113	0.663284	0.666681	0.580565	0.632996	0.674806	0.668476	0.676165	0.648136	0.661925	0.677516	0.624857	0.627789	0.637952	0.631408	0.651297	0.645551	0.625751	0.664178	0.655138	0.660566	0.632981	0.649733	0.737889
6	3	154	0.685212	0.658306	0.655825	0.636386	0.608136	0.654015	0.660788	0.666674	0.658085	0.665766	0.679326	0.648816	0.64858	0.63728	0.615137	0.637051	0.633439	0.653779	0.695375	0.654687	0.657627	0.64677	0.652594	0.796476
6	4	155	0.670744	0.674584	0.668941	0.657856	0.628476	0.654695	0.657405	0.672775	0.667125	0.669835	0.684296	0.657398	0.637959	0.649939	0.654687	0.631401	0.627567	0.648801	0.651519	0.653557	0.659887	0.642472	0.655542	0.681514
6	5	156	0.625912	0.663277	0.677302	0.649259	0.655367	0.615137	0.647014	0.653107	0.674355	0.671645	0.672775	0.647221	0.65016	0.646999	0.618909	0.623941	0.600426	0.655589	0.648129	0.660788	0.65649	0.630721	0.647478	0.745815
6	6	157	0.675492	0.676615	0.675264	0.622354	0.638417	0.556606	0.657405	0.644968	0.65536	0.670515	0.677516	0.640448	0.64971	0.63434	0.618909	0.63773	0.676379	0.65807	0.65423	0.64677	0.642937	0.618971	0.646773	0.740936
6	7	158	0.674813	0.684754	0.676165	0.619886	0.628025	0.584635	0.639547	0.631415	0.65807	0.64353	0.686327	0.637287	0.628004	0.644739	0.615123	0.614451	0.666889	0.653329	0.652871	0.660337	0.635706	0.609702	0.642982	0.746649
6	8	159	0.683631	0.676165	0.677073	0.645197	0.611533	0.681135	0.652649	0.661017	0.65536	0.653786	0.680677	0.617626	0.63841	0.64293	0.604739	0.643387	0.654687	0.647228	0.651977	0.636607	0.609716	0.591622	0.646234	0.708193
6	9	160	0.681822	0.681815	0.632774	0.633446	0.591865	0.666667	0.641356	0.657627	0.621689	0.704865	0.677745	0.612205	0.63999	0.643831	0.623498	0.606319	0.656497	0.627782	0.653557	0.637509	0.643159	0.606991	0.642864	0.743919
6	10	161	0.686342	0.680914	0.640462	0.614236	0.590285	0.680005	0.625086	0.670736	0.619886	0.665773	0.687457	0.612656	0.643151	0.64067	0.626888	0.63773	0.655589	0.631615	0.65197	0.645411	0.651512	0.620987	0.644516	0.753833
6	11	162	0.699451	0.679104	0.631422	0.604746	0.63434	0.672317	0.625536	0.662597	0.617848	0.64903	0.656955	0.666896	0.629599	0.624392	0.642701	0.637959	0.651741	0.644281	0.65581	0.634791	0.649252	0.626423	0.645327	0.754029
6	12	163	0.690411	0.667125	0.654931	0.594125	0.63728	0.664185	0.646105	0.653779	0.635706	0.658757	0.631637	0.667568	0.604288	0.649931	0.64745	0.636829	0.648351	0.63999	0.669606	0.651519	0.64632	0.63841	0.647014	0.744294
6	13	164	0.687472	0.659887	0.532647	0.601585	0.645876	0.661475	0.652885	0.665537	0.652199	0.655145	0.654015	0.666667	0.61807	0.65875	0.647679	0.64632	0.642029	0.649259	0.665086	0.65423	0.660559	0.648129	0.646614	0.727806
6	14	165	0.677073	0.725434	0.526983	0.629155	0.636386	0.657856	0.662376	0.645426	0.648809	0.667575	0.678417	0.672317	0.634333	0.65197	0.648809	0.63389	0.633439	0.65084	0.654687	0.669149	0.674577	0.638624	0.650824	0.765
6	15	166	0.684304	0.681142	0.576946	0.639318	0.651977	0.660566	0.647457	0.664407	0.637966	0.666445	0.682487	0.661246	0.636822	0.652199	0.635256	0.632531	0.65197	0.639761	0.637058	0.659658	0.665308	0.632524	0.649879	0.788429
6	16	167	0.678432	0.670972	0.601141	0.651748	0.652427	0.663956	0.660788	0.652656	0.658306	0.669835	0.66327	0.597286	0.631851	0.648809	0.630447	0.637051	0.64451	0.645869	0.653779	0.653557	0.647006	0.644732	0.648111	0.738155
6	17	168	0.671881	0.660123	0.666231	0.569251	0.659429	0.663277	0.649939	0.624857	0.655145	0.668026	0.680906	0.612427	0.60609	0.65197	0.628187	0.625751	0.646999	0.6418	0.601556	0.641349	0.658979	0.65129	0.642521	0.777296
6	18	169	0.681371	0.662605	0.681135	0.641356	0.645419	0.656497	0.660566	0.669606	0.640677	0.672775	0.652656	0.661017	0.62417	0.639662	0.582582	0.61468	0.649259	0.648351	0.542345	0.65581	0.670507	0.667568	0.646392	0.718831
6	19	170	0.680921	0.672775	0.601127	0.654237	0.533312	0.660116	0.670286	0.66779	0.632545	0.669835	0.595248	0.625987	0.639761	0.64971	0.622139	0.538719	0.63999	0.628004	0.581688	0.651962	0.661239	0.655817	0.633328	0.765461
6	20	171	0.690862	0.662605	0.568579	0.659436	0.5575	0.659658	0.646999	0.6644	0.647686	0.652656	0.654466	0.662147	0.64112	0.639089	0.63728	0.56428	0.632073	0.633432	0.593667	0.616253	0.656039	0.664629	0.636584	0.673799
6	21	172	0.677524	0.671194	0.630521	0.641807	0.551156	0.668698	0.667346	0.668698	0.649037	0.609716	0.665995	0.668019	0.64293	0.637959	0.617161	0.591629	0.634333	0.641571	0.639318	0.644739	0.64903	0.649481	0.641721	0.705481
6	22	173	0.668476	0.677745	0.640012	0.623491	0.655145	0.665759	0.668026	0.648358	0.662826	0.595927	0.648144	0.675929	0.626659	0.625079	0.631401	0.603158	0.64632	0.64406	0.639089	0.627567	0.649481	0.661918	0.644753	0.697045
6	23	174	0.666903	0.653779	0.645433	0.653107	0.649037	0.654466	0.656497	0.566998	0.662369	0.629835	0.573091	0.684525	0.608557	0.620559	0.63434	0.62033	0.633439	0.638631	0.652199	0.649037	0.655589	0.642472	0.638691	0.717192
6	24	175	0.647922	0.665537	0.649052	0.662826	0.656726	0.642486	0.658986	0.625086	0.670057	0.607685	0.610846	0.662826	0.599982	0.630729	0.63954	0.6027	0.62937	0.635692	0.64858	0.642029	0.661239	0.632524	0.64011	0.694349
6	25	176	0.686342	0.663727	0.669842	0.650618	0.665537	0.586215	0.666896	0.658077	0.671866	0.642265	0.659215	0.658306	0.629591	0.630298	0.644739	0.64406	0.62824	0.64225	0.648129	0.637509	0.648129	0.639532	0.648699	0.713418
6	26	177	0.669614	0.655596	0.682723	0.658077	0.667346	0.653786	0.662376	0.655138	0.676157	0.591179	0.657856	0.6644	0.633432	0.626191	0.62824	0.64225	0.6305	0.628912	0.650611	0.650618	0.668698	0.642701	0.649836	0.701457
6	27	178	0.671423	0.664192	0.680463	0.668026	0.662376	0.668927	0.664407	0.640677	0.673669	0.640906	0.659436	0.64903	0.629141	0.622951	0.637501	0.64564	0.617169	0.64406	0.620322	0.645869	0.651748	0.635914	0.64972	0.721469
6	28	179	0.650182	0.663609	0.690182	0.671416	0.661017	0.671416	0.660337	0.662147	0.666889	0.654916	0.686106	0.669377	0.636371	0.63163	0.63999	0.634791	0.609487	0.634569	0.63547	0.651741	0.655589	0.628225	0.652975	0.647736
6	29	180	0.658771	0.674134	0.681142	0.637287	0.655817	0.663956	0.563157	0.652878	0.689267	0.665086	0.682716	0.673897	0.639089	0.627331	0.613779	0.632981	0.617169	0.63321	0.637959	0.65355	0.640441	0.607199	0.645492	0.771544
6	30	181	0.667132	0.658085	0.672331	0.602486	0.649717	0.659658	0.592545	0.653779	0.669835	0.665308	0.673225	0.670736	0.63389	0.634791	0.606548	0.638631	0.64971	0.63208	0.641349	0.646999	0.621002	0.571932	0.641444	0.769558
7	1	182	0.672553	0.672324	0.660352	0.648358	0.662826	0.656947	0.656955	0.666889	0.671637	0.653786	0.642486	0.666667	0.654008	0.63886	0.579199	0.607892	0.639311	0.642479	0.635699	0.606312	0.654687	0.49869	0.640405	0.693883
7	2	183	0.664192	0.677745	0.679111	0.661239	0.662376	0.656046	0.620115	0.668247	0.661918	0.663048	0.680456	0.673897	0.6366	0.64519	0.536016	0.611969	0.64745	0.65197	0.6366	0.593217	0.656947	0.601556	0.644814	0.693069
7	3	184	0.641814	0.681586	0.656962	0.665759	0.662376	0.648365	0.636836	0.657169	0.655589	0.658077	0.680906	0.675027	0.64406	0.645226	0.545063	0.622139	0.63841	0.644739	0.633432	0.642479	0.655138	0.64067	0.646901	0.668761
7	4	185	0.664414	0.681364	0.641821	0.648809	0.654916	0.672996	0.654237	0.65016	0.672539	0.664407	0.664185	0.665987	0.63999	0.638631	0.57965	0.62824	0.643831	0.642021	0.640891	0.65016	0.644289	0.644289	0.649447	0.692928
7	5	186	0.684067	0.673905	0.650411	0.655589	0.653107	0.666667	0.651076	0.648358	0.673447	0.657849	0.680906	0.688137	0.63886	0.643609	0.618749	0.64067	0.641571	0.649481	0.637641	0.648351	0.64519	0.628905	0.653479	0.655312
7	6	187	0.699222	0.680005	0.656511	0.65084	0.650396	0.673447	0.633225	0.658077	0.668476	0.657627	0.687915	0.675707	0.639761	0.640219	0.608572	0.643831	0.626881	0.64971	0.635921	0.650382	0.64067	0.612627	0.651819	0.765681
7	7	188	0.705781	0.660795	0.670751	0.657169	0.658306	0.670736	0.650625	0.668698	0.641585	0.658979	0.667575	0.667568	0.637272	0.64293	0.63276	0.63547	0.632531	0.642701	0.65468	0.635699	0.64971	0.607199	0.652251	0.736938
7	8	189	0.682272	0.671187	0.657641	0.648358	0.651069	0.664407	0.661696	0.674577	0.648816	0.646327	0.609037	0.680906	0.641571	0.651069	0.616031	0.645419	0.63208	0.638631	0.644961	0.619879	0.654909	0.612176	0.647864	0.759695
7	9	190	0.670515	0.671645	0.649731	0.637287	0.650618	0.657849	0.664857	0.665537	0.654916	0.637516	0.684075	0.682716	0.637501	0.641349	0.632531	0.63999	0.641571	0.630492	0.631179	0.617619	0.6531	0.632752	0.649334	0.695459
7	10	191	0.663513	0.677524	0.690182	0.658757	0.645419	0.669385	0.649045	0.670958	0.668927	0.655145	0.688144	0.687915	0.641578	0.631401	0.639769	0.635241	0.639311	0.645411	0.63547	0.625529	0.651069	0.635234	0.654769	0.737591
7	11	192	0.671423	0.675035	0.694931	0.660337	0.656947	0.660566	0.649717	0.669377	0.673447	0.658757	0.679555	0.681357	0.638188	0.629141	0.625529	0.638631	0.64564	0.648351	0.627789	0.64067	0.64745	0.632295	0.654779	0.721957
7	12	193	0.656054	0.675035	0.686571	0.659207	0.664407	0.659658	0.662147	0.672317	0.663727	0.662147	0.682716	0.674799	0.6366	0.63773	0.636829	0.641342	0.64677	0.644281	0.614909	0.63999	0.634562	0.637952	0.654079	0.732889
7	13	194	0.668033	0.671194	0.680241	0.656947	0.661246	0.65423	0.664407	0.667568	0.661239	0.662376	0.686099	0.665079	0.63208	0.64519	0.629148	0.642701	0.632073	0.63547	0.618299	0.64112	0.62869	0.638402	0.651901	0.747561
7	14	195	0.678882	0.669835	0.691541	0.667568	0.667575	0.666889	0.666667	0.66485	0.669149	0.662826	0.679547	0.705988	0.63999	0.64293	0.63389	0.64677	0.637272	0.637316	0.64745	0.64564	0.65242	0.651962	0.660316	0.699742
7	15	196	0.669163	0.672095	0.686792	0.669377	0.663055	0.671637	0.627782	0.66033	0.670057	0.655596	0.670507	0.657405	0.64293	0.64903	0.62824	0.64451	0.636371	0.640899	0.65084	0.64903	0.643831	0.641922	0.654609	0.711751
7	16	197	0.682723	0.676615	0.675721	0.671637	0.663956	0.664857	0.642036	0.651519	0.675256	0.589598	0.674806	0.683166	0.62711	0.636371	0.626209	0.646541	0.623262	0.6418	0.65355	0.653329	0.63954	0.63954	0.651779	0.702154
7	17	198	0.680463	0.669842	0.678432	0.668927	0.653786	0.664857	0.629606	0.649946	0.675027	0.519273	0.673897	0.688144	0.63841	0.612191	0.640448	0.634333	0.626201	0.63788	0.650611	0.641578	0.638631	0.628461	0.645498	0.68407
7	18	199	0.685891	0.689954	0.681822	0.657849	0.657856	0.656497	0.644296	0.663277	0.671187	0.558165	0.677059	0.684296	0.632531	0.632302	0.655367	0.632295	0.63886	0.631666	0.63886	0.643159	0.647442	0.668019	0.652211	0.669867
7	19	200	0.684311	0.664185	0.681371	0.659207	0.665537	0.654687	0.619886	0.666667	0.668927	0.58982	0.669828	0.680227	0.638631	0.636272	0.647159	0.615581	0.628912	0.62432	0.644961	0.63434	0.635692	0.645862	0.648017	0.708519
7	20	201	0.687021	0.675035	0.672102	0.666896	0.648136	0.646556	0.656275	0.653786	0.663048	0.649495	0.677287	0.680677	0.627782	0.63434	0.608794	0.63547	0.630721	0.639318	0.625071	0.62146	0.64451	0.623698	0.648522	0.728536
7	21	202	0.682051	0.663964	0.668491	0.657398	0.661925	0.668255	0.652878	0.670736	0.665079	0.665987	0.677967	0.661918	0.633882	0.632302	0.64451	0.634111	0.625972	0.641836	0.640212	0.635699	0.652649	0.601312	0.651779	0.669483
7	22	203	0.687701	0.647693	0.674141	0.667652	0.662376	0.670293	0.650396	0.672767	0.674348	0.665537	0.685877	0.666438	0.629362	0.637051	0.611511	0.63095	0.632531	0.64127	0.618291	0.64632	0.62485	0.570559	0.648542	0.675015
7	23	204	0.680692	0.665315	0.672331	0.660795	0.663727	0.660802	0.647686	0.666889	0.678417	0.665086	0.683617	0.666667	0.629813	0.635948	0.639997	0.63208	0.64225	0.64353	0.6418	0.644739	0.648801	0.605389	0.653471	0.678472
7	24	205	0.696061	0.670064	0.680921	0.661696	0.5914	0.645662	0.660116	0.662369	0.677516	0.669835	0.681586	0.678646	0.625744	0.63841	0.644739	0.628011	0.642021	0.639815	0.618971	0.63434	0.649252	0.629126	0.651196	0.681487
7	25	206	0.697191	0.679555	0.672318	0.653557	0.589147	0.672331	0.648358	0.676157	0.669156	0.664185	0.683617	0.661017	0.628461	0.64067	0.652199	0.6253	0.636371	0.628993	0.62304	0.6418	0.644503	0.637051	0.651135	0.686832
7	26	207	0.694702	0.690633	0.67708	0.658077	0.645647	0.664872	0.667575	0.677967	0.677967	0.668705	0.660788	0.664178	0.641571	0.640899	0.644899	0.61129	0.629591	0.633926	0.63954	0.64406	0.638181	0.590692	0.652856	0.67525
7	27	208	0.687021	0.687243	0.671201	0.662826	0.649266	0.668491	0.671416	0.672767	0.670507	0.667575	0.665086	0.667797	0.639311	0.636379	0.620544	0.628919	0.633203	0.644335	0.6479	0.6479	0.63208	0.60471	0.653476	0.691759
7	28	209	0.677531	0.679326	0.675042	0.677745	0.658986	0.672102	0.673225	0.673447	0.662369	0.670064	0.682716	0.670736	0.62304	0.646999	0.636263	0.598409	0.6418	0.649985	0.64858	0.625972	0.631172	0.630485	0.654818	0.685484
7	29	210	0.684761	0.667804	0.680228	0.666896	0.653114	0.664421	0.658986	0.671187	0.649488	0.616275	0.685655	0.589598	0.6253	0.644289	0.633837	0.564051	0.638631	0.646356	0.645419	0.62304	0.642701	0.630943	0.644681	0.73342
7	30	211	0.684761	0.675264	0.679098	0.682036	0.650625	0.673461	0.671645	0.674348	0.647228	0.651076	0.682265	0.662147	0.629599	0.642708	0.632383	0.604739	0.638181	0.633203	0.64564	0.626659	0.65129	0.648809	0.653962	0.671301
7	31	212	0.689961	0.678654	0.672782	0.666216	0.640005	0.691091	0.669156	0.67163	0.665537	0.668927	0.672095	0.670057	0.633439	0.639769	0.631571	0.620101	0.640441	0.639338	0.640219	0.64632	0.643831	0.6531	0.656556	0.632091
8	1	213	0.680241	0.670064	0.655832	0.656719	0.656046	0.691091	0.662147	0.678189	0.668698	0.669835	0.677745	0.668927	0.667797	0.641349	0.602922	0.638181	0.653136	0.641578	0.632767	0.673897	0.652871	0.638181	0.658101	0.625102
8	2	214	0.687701	0.687243	0.616725	0.661017	0.632981	0.682051	0.656497	0.664857	0.676837	0.670057	0.679326	0.662826	0.629141	0.63502	0.634576	0.63728	0.648378	0.632767	0.61242	0.639311	0.6531	0.649488	0.652254	0.713448
8	3	215	0.685441	0.675714	0.569265	0.663506	0.650847	0.692671	0.667346	0.660116	0.678196	0.663277	0.681135	0.659887	0.643609	0.62643	0.597722	0.62869	0.631172	0.611297	0.643831	0.641342	0.65129	0.637272	0.648184	0.661205
8	4	216	0.677531	0.679104	0.585307	0.668476	0.663735	0.692221	0.660116	0.653336	0.687465	0.660788	0.674799	0.642486	0.64745	0.631851	0.63276	0.62417	0.637501	0.604288	0.639311	0.634791	0.648122	0.640212	0.649355	0.630157
8	5	217	0.666668	0.679555	0.645198	0.665308	0.663277	0.688831	0.666445	0.675256	0.682036	0.662369	0.674577	0.678875	0.63502	0.628004	0.631179	0.60948	0.63547	0.637959	0.6531	0.63954	0.64564	0.632302	0.654368	0.675575
8	6	218	0.645891	0.673004	0.665538	0.670507	0.649037	0.683618	0.667797	0.663499	0.665537	0.662369	0.676837	0.679547	0.63095	0.62191	0.628919	0.61468	0.63223	0.637952	0.648344	0.631179	0.645862	0.592051	0.649421	0.658337
8	7	219	0.632331	0.663284	0.677531	0.664636	0.651076	0.665538	0.671416	0.649259	0.675478	0.649939	0.674806	0.681128	0.619429	0.62937	0.637058	0.63773	0.64406	0.625972	0.639082	0.636157	0.642701	0.568314	0.647104	0.667123
8	8	220	0.583061	0.671874	0.680241	0.677516	0.65242	0.692671	0.668247	0.656268	0.675478	0.655367	0.676386	0.675707	0.61965	0.62417	0.598624	0.626659	0.632752	0.645419	0.627553	0.622597	0.635921	0.587981	0.644844	0.668639
8	9	221	0.638418	0.670965	0.671201	0.665766	0.653329	0.694481	0.665766	0.672317	0.661017	0.665086	0.680906	0.673225	0.63095	0.63208	0.62598	0.625529	0.642701	0.638631	0.644281	0.648809	0.630729	0.624385	0.652571	0.672589
8	10	222	0.664872	0.673004	0.682051	0.661475	0.657856	0.688151	0.674126	0.672767	0.675936	0.665766	0.681357	0.612427	0.62711	0.63999	0.6305	0.6305	0.638181	0.635012	0.65581	0.65423	0.634119	0.620086	0.653424	0.635623
8	11	223	0.680921	0.679562	0.677531	0.668476	0.661246	0.666903	0.65988	0.667797	0.677967	0.666216	0.679097	0.599317	0.639089	0.639761	0.63095	0.64677	0.633661	0.628683	0.646312	0.6366	0.635928	0.588196	0.650494	0.692284
8	12	224	0.673461	0.673004	0.686571	0.668476	0.634126	0.674141	0.640226	0.662826	0.677516	0.676615	0.684747	0.614916	0.63163	0.622804	0.630271	0.639311	0.643831	0.638631	0.639761	0.642479	0.630049	0.616017	0.650064	0.676057
8	13	225	0.674578	0.676844	0.684748	0.667346	0.654916	0.669621	0.643845	0.657627	0.672317	0.661696	0.687457	0.654466	0.637959	0.61174	0.608121	0.64293	0.63954	0.63886	0.646999	0.641571	0.62146	0.64858	0.651965	0.667333
8	14	226	0.660581	0.677524	0.685441	0.656046	0.652871	0.653801	0.659665	0.663277	0.673897	0.668026	0.683846	0.661696	0.641349	0.62869	0.624621	0.631179	0.644739	0.640219	0.642479	0.635921	0.643609	0.657849	0.653969	0.712442
8	15	227	0.680692	0.685434	0.653108	0.663055	0.646777	0.633461	0.662597	0.663277	0.669156	0.672095	0.684525	0.674806	0.62756	0.63276	0.630271	0.632309	0.646999	0.643831	0.65016	0.651519	0.653329	0.642021	0.654534	0.690976
8	16	228	0.661711	0.678654	0.639111	0.660116	0.666438	0.643631	0.656497	0.673897	0.677745	0.663506	0.666896	0.675256	0.626659	0.63841	0.61807	0.6305	0.64225	0.642708	0.645404	0.63999	0.654459	0.635692	0.651709	0.616909
8	17	229	0.654238	0.685662	0.678661	0.654008	0.654008	0.676401	0.665086	0.663277	0.665315	0.666216	0.675714	0.673447	0.62146	0.629141	0.617619	0.6253	0.680227	0.624399	0.640434	0.63434	0.65197	0.632295	0.653146	0.698461
8	18	230	0.661711	0.676172	0.685441	0.645419	0.688137	0.677531	0.653786	0.660337	0.663055	0.658757	0.673004	0.678196	0.623491	0.620101	0.61581	0.62643	0.620773	0.640219	0.640899	0.64406	0.64632	0.636822	0.651658	0.677407
8	19	231	0.692442	0.663742	0.682952	0.664636	0.668934	0.666668	0.671416	0.664407	0.674126	0.661017	0.672324	0.677066	0.634569	0.617841	0.617619	0.617619	0.639761	0.639318	0.649939	0.629141	0.641349	0.628232	0.653414	0.668087
8	20	232	0.689732	0.679784	0.684311	0.655367	0.666896	0.685441	0.661246	0.670057	0.644975	0.668247	0.663062	0.654466	0.622819	0.630049	0.602929	0.62598	0.617841	0.64293	0.649488	0.631859	0.648129	0.616704	0.650559	0.74266
8	21	233	0.686342	0.676622	0.677968	0.660116	0.661696	0.690182	0.656046	0.665086	0.660116	0.657856	0.661475	0.616947	0.618749	0.617619	0.557271	0.63615	0.642479	0.63321	0.642029	0.629599	0.652649	0.617161	0.646244	0.723216
8	22	234	0.689732	0.676394	0.666668	0.651755	0.661246	0.680692	0.662826	0.659665	0.667346	0.669835	0.662826	0.634805	0.613328	0.61694	0.605869	0.64225	0.648129	0.63095	0.632538	0.631179	0.657169	0.604266	0.648473	0.718185
8	23	235	0.694481	0.680463	0.691091	0.658986	0.665315	0.670751	0.667346	0.668927	0.660566	0.632545	0.666445	0.636386	0.601799	0.61807	0.611969	0.63886	0.63615	0.637959	0.639997	0.63502	0.654909	0.568993	0.647138	0.729479
8	24	236	0.693351	0.643624	0.688151	0.658306	0.651755	0.670071	0.668705	0.669377	0.665766	0.597966	0.669828	0.643845	0.616711	0.61807	0.61468	0.64858	0.646549	0.656039	0.632538	0.651069	0.658979	0.57013	0.647004	0.649032
8	25	237	0.693351	0.667575	0.682051	0.666896	0.645426	0.687021	0.649045	0.659207	0.661475	0.635485	0.674813	0.671187	0.617841	0.627789	0.62982	0.640899	0.639997	0.625758	0.633439	0.651069	0.656268	0.619872	0.651649	0.716508
8	26	238	0.695611	0.633232	0.665773	0.662826	0.643845	0.681142	0.644296	0.645197	0.672996	0.649045	0.660802	0.671416	0.62756	0.618299	0.636379	0.640899	0.646549	0.590499	0.655138	0.647457	0.655589	0.652878	0.649883	0.704226
8	27	239	0.691091	0.621252	0.679791	0.643845	0.620795	0.692671	0.664636	0.650618	0.663277	0.660566	0.645662	0.649266	0.611969	0.623269	0.630729	0.641349	0.651519	0.611297	0.646549	0.637959	0.637959	0.641349	0.646246	0.703668
8	28	240	0.701711	0.600226	0.596392	0.665086	0.608815	0.693801	0.661696	0.663727	0.667797	0.666445	0.674355	0.658535	0.61739	0.63434	0.633439	0.648809	0.639089	0.616718	0.644968	0.64112	0.651748	0.608557	0.645217	0.641968
8	29	241	0.695611	0.600684	0.618078	0.656497	0.638188	0.686571	0.655817	0.666896	0.660109	0.643845	0.672324	0.670286	0.63434	0.633439	0.609938	0.649259	0.64067	0.612877	0.637737	0.635241	0.642937	0.642701	0.645638	0.686054
8	30	242	0.696061	0.632102	0.645198	0.655589	0.656046	0.688151	0.672095	0.629606	0.654466	0.664865	0.671416	0.680456	0.63728	0.619421	0.613779	0.656268	0.6424	0.605189	0.645647	0.63999	0.645876	0.64971	0.650073	0.682176
8	31	243	0.698321	0.670293	0.613342	0.644517	0.656046	0.689281	0.671416	0.586659	0.669606	0.651526	0.662826	0.675256	0.614451	0.62643	0.59931	0.654909	0.647159	0.621411	0.654909	0.643159	0.655589	0.612405	0.64631	0.681564
9	1	244	0.679791	0.668255	0.613114	0.656504	0.649266	0.692671	0.660795	0.646098	0.647457	0.659215	0.658986	0.681586	0.626423	0.62824	0.613099	0.63954	0.647679	0.637058	0.635699	0.646549	0.642257	0.614894	0.647508	0.709244
9	2	245	0.683181	0.666903	0.648594	0.654924	0.654466	0.690862	0.672095	0.663727	0.643616	0.668705	0.663506	0.670057	0.63999	0.63095	0.619429	0.639769	0.63886	0.641578	0.6366	0.638639	0.653329	0.613535	0.651514	0.698188
9	3	246	0.640241	0.667354	0.668255	0.663506	0.661696	0.686342	0.667125	0.668247	0.651526	0.670515	0.667354	0.665544	0.62259	0.6305	0.613328	0.633661	0.62982	0.645869	0.648351	0.681128	0.655589	0.637501	0.653456	0.708043
9	4	247	0.606341	0.676394	0.674134	0.660795	0.663277	0.683853	0.659665	0.625315	0.652206	0.667125	0.666903	0.658535	0.62982	0.638867	0.612198	0.614	0.64632	0.643159	0.62824	0.637287	0.651748	0.642029	0.647191	0.675319
9	5	248	0.665101	0.669614	0.676394	0.643387	0.661925	0.694917	0.660795	0.578069	0.616496	0.663055	0.668033	0.674806	0.63502	0.612877	0.59479	0.577611	0.643609	0.632989	0.649939	0.654909	0.65807	0.61965	0.643275	0.674885
9	6	249	0.664872	0.671423	0.670736	0.647907	0.655596	0.601806	0.564287	0.571067	0.652206	0.662376	0.664192	0.678196	0.63321	0.604967	0.63954	0.596875	0.63389	0.625987	0.646098	0.638181	0.609924	0.642479	0.635264	0.6504
9	7	250	0.685878	0.656962	0.64519	0.668247	0.661246	0.581237	0.577626	0.628476	0.604967	0.665315	0.660123	0.674577	0.62869	0.62078	0.63615	0.595417	0.62982	0.635935	0.649488	0.673669	0.637509	0.646091	0.639245	0.656468
9	8	251	0.650848	0.666002	0.652664	0.651069	0.654466	0.608594	0.614694	0.652206	0.639776	0.643831	0.664414	0.673897	0.6192	0.63208	0.63389	0.582424	0.62937	0.588017	0.634798	0.599317	0.649717	0.59115	0.633292	0.709647
9	9	252	0.663278	0.664643	0.656054	0.664407	0.656046	0.660574	0.631408	0.624864	0.658535	0.646777	0.668705	0.663727	0.625529	0.632531	0.618299	0.57513	0.63321	0.603837	0.652199	0.604517	0.630729	0.59454	0.637706	0.695673
9	10	253	0.662148	0.674362	0.627804	0.660795	0.663735	0.670972	0.640226	0.621016	0.642494	0.642036	0.667575	0.668927	0.63728	0.625079	0.611519	0.597286	0.624621	0.618756	0.651748	0.634404	0.630507	0.595005	0.639468	0.660711
9	11	254	0.674141	0.673004	0.646563	0.658085	0.632767	0.690633	0.56722	0.644296	0.664407	0.651984	0.656504	0.671416	0.636829	0.598569	0.624628	0.612198	0.636829	0.615366	0.658528	0.64067	0.626666	0.618513	0.640901	0.707232
9	12	255	0.678661	0.721143	0.657405	0.655145	0.654687	0.677295	0.533756	0.639096	0.642715	0.654015	0.651755	0.708255	0.632531	0.61581	0.62191	0.607678	0.641349	0.628018	0.635699	0.655138	0.601577	0.594318	0.641271	0.694864
9	13	256	0.682952	0.675943	0.667125	0.663055	0.649946	0.676386	0.592995	0.616046	0.606326	0.657405	0.662154	0.674126	0.609022	0.62711	0.61739	0.609487	0.643159	0.623949	0.63728	0.657849	0.613779	0.611955	0.639793	0.652498
9	14	257	0.687008	0.695153	0.673676	0.668705	0.661475	0.674134	0.618985	0.655145	0.632095	0.636844	0.672775	0.689946	0.614	0.63615	0.61581	0.606548	0.639089	0.634347	0.64519	0.659207	0.63886	0.610381	0.648433	0.655514
9	15	258	0.688138	0.680914	0.673683	0.651526	0.643616	0.691312	0.627124	0.661017	0.607235	0.607464	0.662834	0.673676	0.622819	0.6418	0.622368	0.635921	0.626659	0.620787	0.657398	0.649717	0.628018	0.549096	0.64196	0.69993
9	16	259	0.686571	0.662161	0.673683	0.650175	0.656504	0.673232	0.654916	0.665995	0.608365	0.640906	0.669835	0.648358	0.631859	0.640899	0.621009	0.62869	0.643609	0.632087	0.646556	0.677287	0.644746	0.601777	0.648146	0.671645
9	17	260	0.681371	0.636622	0.670515	0.656504	0.639325	0.670286	0.663735	0.663506	0.570395	0.591186	0.666896	0.591179	0.6305	0.640899	0.643609	0.648572	0.62824	0.638639	0.624406	0.658528	0.628476	0.62078	0.63928	0.734377
9	18	261	0.663971	0.653121	0.654473	0.662605	0.642257	0.590277	0.637294	0.664865	0.581245	0.597294	0.651748	0.611068	0.625529	0.637509	0.648587	0.642922	0.65355	0.642257	0.615817	0.643159	0.597744	0.607671	0.632953	0.678753
9	19	262	0.680241	0.682723	0.657863	0.658535	0.572197	0.589834	0.626674	0.663956	0.650175	0.636615	0.652656	0.652885	0.632538	0.632309	0.645704	0.675478	0.639089	0.632538	0.640448	0.665537	0.628926	0.591171	0.641277	0.650065
9	20	263	0.662161	0.687694	0.642043	0.666674	0.607914	0.569716	0.614694	0.671416	0.649717	0.660345	0.669156	0.654015	0.626888	0.62982	0.646267	0.650167	0.632767	0.632087	0.667346	0.660109	0.649037	0.613314	0.643789	0.687539
9	21	264	0.660581	0.673232	0.632552	0.666674	0.605425	0.553202	0.630965	0.660566	0.648809	0.649274	0.673905	0.652427	0.613557	0.637959	0.594332	0.659658	0.621917	0.654687	0.643159	0.660109	0.652427	0.579392	0.637491	0.712695
9	22	265	0.671201	0.640012	0.567449	0.652664	0.600226	0.570388	0.669606	0.646777	0.696497	0.654015	0.669606	0.629377	0.625079	0.642479	0.632309	0.650463	0.616039	0.661696	0.65129	0.625071	0.647228	0.503896	0.63288	0.716179
9	23	266	0.698321	0.620351	0.644303	0.663513	0.651755	0.575137	0.664636	0.663956	0.667575	0.672775	0.655367	0.596149	0.617848	0.63208	0.626437	0.631637	0.63502	0.646556	0.629141	0.6192	0.649037	0.583934	0.638397	0.729114
9	24	267	0.658758	0.640691	0.659665	0.661475	0.660574	0.655152	0.651534	0.654237	0.655367	0.655596	0.662369	0.617626	0.610617	0.643838	0.620108	0.626437	0.633882	0.653051	0.538505	0.648816	0.640906	0.605182	0.638836	0.727171
9	25	268	0.633911	0.666681	0.669385	0.665544	0.670064	0.670293	0.660345	0.65423	0.702155	0.630507	0.660795	0.613786	0.616718	0.612198	0.638188	0.62033	0.615359	0.649037	0.54507	0.642486	0.641807	0.643838	0.641942	0.665469
9	26	269	0.639548	0.642951	0.649495	0.670064	0.677974	0.668712	0.657184	0.644296	0.663513	0.638875	0.655374	0.621467	0.629148	0.606777	0.644289	0.635928	0.599768	0.654687	0.598867	0.6531	0.652427	0.637501	0.642816	0.722983
9	27	270	0.642938	0.623291	0.641364	0.672095	0.667125	0.664643	0.675264	0.652885	0.659215	0.645884	0.642265	0.632316	0.627789	0.608808	0.636157	0.650618	0.660109	0.654687	0.614007	0.628469	0.614916	0.64112	0.643453	0.713232
9	28	271	0.622161	0.625551	0.665766	0.652656	0.659436	0.675492	0.658314	0.670965	0.661704	0.632774	0.603837	0.506629	0.631859	0.607227	0.608586	0.649939	0.658299	0.657849	0.620337	0.650618	0.642937	0.630492	0.636065	0.737757
9	29	272	0.649281	0.610632	0.685434	0.636607	0.656054	0.667354	0.649274	0.687465	0.682265	0.658986	0.669156	0.579642	0.639089	0.620108	0.578298	0.641578	0.595677	0.676615	0.616267	0.645647	0.648136	0.599067	0.640574	0.63624
9	30	273	0.652664	0.589605	0.653794	0.614916	0.639332	0.670064	0.664865	0.658764	0.651069	0.656504	0.633897	0.614916	0.63728	0.601349	0.628926	0.651297	0.545514	0.648129	0.620115	0.664407	0.668026	0.623941	0.635881	0.766773
10	1	274	0.580107	0.659672	0.647242	0.594125	0.665773	0.674584	0.673225	0.642715	0.687915	0.643624	0.625987	0.607456	0.631851	0.531496	0.620337	0.652199	0.58349	0.648816	0.590056	0.64519	0.621689	0.6366	0.630189	0.72808
10	2	275	0.628712	0.693344	0.618535	0.625994	0.658306	0.674362	0.65875	0.667804	0.659215	0.609044	0.637294	0.588697	0.637959	0.598416	0.601577	0.662597	0.617626	0.646549	0.580107	0.628697	0.647457	0.635241	0.635286	0.69093
10	3	276	0.653121	0.683174	0.631422	0.611984	0.615817	0.637523	0.653114	0.670965	0.660345	0.611976	0.647686	0.598638	0.627789	0.599768	0.602021	0.656719	0.630507	0.655145	0.572197	0.605196	0.635027	0.626652	0.631218	0.776496
10	4	277	0.656962	0.682952	0.596836	0.619665	0.607914	0.650175	0.633454	0.629384	0.633904	0.660566	0.673454	0.637737	0.600669	0.608357	0.625079	0.587774	0.638639	0.637287	0.594576	0.564516	0.636836	0.64293	0.628167	0.693711
10	5	278	0.664872	0.687701	0.596156	0.651526	0.634355	0.664643	0.570388	0.584177	0.640005	0.661925	0.664185	0.645647	0.603837	0.613328	0.629827	0.555912	0.649037	0.651297	0.644739	0.588697	0.618756	0.644739	0.630261	0.689182
10	6	279	0.675721	0.681822	0.611304	0.641578	0.621925	0.645662	0.648816	0.576274	0.635714	0.660574	0.648809	0.648358	0.588697	0.637509	0.670736	0.540765	0.654687	0.659207	0.659887	0.650396	0.594576	0.633654	0.635758	0.683836
10	7	280	0.654251	0.684082	0.653565	0.661925	0.656733	0.654022	0.664414	0.628934	0.645884	0.659665	0.665995	0.639096	0.594561	0.633439	0.637516	0.550713	0.642036	0.658077	0.642257	0.601306	0.614465	0.664629	0.641253	0.645557
10	8	281	0.594118	0.684082	0.680906	0.619214	0.652885	0.678425	0.645197	0.590735	0.655825	0.645204	0.666224	0.632316	0.67231	0.63728	0.644517	0.556592	0.630736	0.625987	0.647907	0.601127	0.609716	0.627331	0.636302	0.740717
10	9	282	0.505964	0.708491	0.658306	0.56202	0.652664	0.670071	0.650625	0.621703	0.671645	0.604517	0.663513	0.607006	0.640219	0.644968	0.648358	0.600676	0.619207	0.635027	0.652427	0.658299	0.659894	0.614	0.634073	0.781885
10	10	283	0.575373	0.671652	0.714363	0.659894	0.644303	0.668712	0.651076	0.598195	0.662154	0.639325	0.638653	0.612427	0.615359	0.612877	0.642708	0.594347	0.647457	0.642036	0.651297	0.653107	0.625536	0.617161	0.638091	0.787315
10	11	284	0.611311	0.680012	0.677974	0.666224	0.615374	0.647014	0.632774	0.641364	0.654473	0.658764	0.644982	0.608586	0.623949	0.614007	0.67276	0.587338	0.63434	0.632774	0.662597	0.657627	0.636607	0.613535	0.639745	0.686309
10	12	285	0.585994	0.562478	0.654022	0.662383	0.620573	0.614923	0.610396	0.644296	0.657856	0.662834	0.627575	0.609938	0.629148	0.615581	0.643845	0.623047	0.649717	0.604517	0.665086	0.598416	0.637737	0.559266	0.624529	0.794275
10	13	286	0.570388	0.621703	0.644975	0.603172	0.602264	0.611082	0.635485	0.637072	0.645426	0.659444	0.602035	0.636157	0.644289	0.61739	0.631415	0.628926	0.651526	0.637058	0.663727	0.604457	0.637287	0.572862	0.62537	0.733221
10	14	287	0.634126	0.648601	0.583269	0.668934	0.660795	0.623062	0.646785	0.655825	0.666674	0.673676	0.597279	0.650396	0.654459	0.638417	0.609037	0.573549	0.660788	0.648587	0.651917	0.596378	0.642036	0.569258	0.634266	0.702288
10	15	288	0.651534	0.669163	0.608579	0.662154	0.659436	0.626223	0.637974	0.656275	0.672088	0.666438	0.678639	0.620566	0.677738	0.612198	0.616046	0.622146	0.648587	0.639776	0.602936	0.608586	0.630736	0.572412	0.638192	0.680349
10	16	289	0.655825	0.667354	0.640234	0.656726	0.665094	0.658314	0.628483	0.688137	0.633675	0.541659	0.670515	0.588017	0.63728	0.630049	0.611976	0.641127	0.637287	0.618985	0.593446	0.587338	0.648365	0.588461	0.631288	0.754024
10	17	290	0.593896	0.678882	0.655374	0.653114	0.643402	0.668033	0.606334	0.657627	0.687915	0.548217	0.655603	0.623055	0.636379	0.63276	0.607006	0.626216	0.655138	0.621024	0.584177	0.56767	0.651519	0.629141	0.631022	0.639271
10	18	291	0.610174	0.685205	0.667346	0.597065	0.611304	0.669163	0.609044	0.687465	0.639997	0.592988	0.660802	0.612434	0.629377	0.632302	0.614465	0.660109	0.650167	0.614465	0.616725	0.661475	0.600219	0.623941	0.63392	0.657418
10	19	292	0.655381	0.651312	0.654473	0.584177	0.626674	0.675943	0.618084	0.677967	0.619207	0.598867	0.636615	0.567677	0.59027	0.561562	0.594576	0.637966	0.609466	0.610846	0.616046	0.597966	0.597279	0.658979	0.620061	0.727147
10	20	293	0.651991	0.676622	0.705774	0.618764	0.662605	0.678882	0.661475	0.618299	0.676386	0.611068	0.618985	0.576267	0.58869	0.598638	0.58304	0.6027	0.557035	0.639547	0.636386	0.578527	0.595019	0.658077	0.627035	0.698654
10	21	294	0.641142	0.678432	0.633225	0.614015	0.563143	0.681822	0.622146	0.611755	0.653114	0.641135	0.619894	0.661696	0.645876	0.599317	0.557715	0.588468	0.619886	0.661246	0.628476	0.609037	0.63615	0.623262	0.626861	0.718218
10	22	295	0.639561	0.682952	0.647464	0.635485	0.597966	0.680241	0.625994	0.585307	0.660574	0.657863	0.669392	0.652206	0.642486	0.592537	0.612856	0.604967	0.632316	0.673676	0.609266	0.641578	0.637287	0.62711	0.636777	0.695404
10	23	296	0.634362	0.700131	0.644982	0.633897	0.619894	0.664872	0.619214	0.598416	0.629613	0.645433	0.651991	0.622375	0.646777	0.606097	0.649037	0.621016	0.60903	0.6644	0.644067	0.649946	0.606541	0.603609	0.634805	0.695621		z-Test: Two Sample for Means	Alpha=0.01
10	24	297	0.640241	0.672324	0.661467	0.633217	0.613793	0.693122	0.597286	0.605425	0.631415	0.644525	0.655152	0.575359	0.631637	0.601127	0.631859	0.590492	0.639325	0.654591	0.646327	0.637516	0.655138	0.601349	0.632395	0.722193
10	25	298	0.669614	0.674362	0.666224	0.57965	0.612663	0.669614	0.595248	0.620795	0.653114	0.669385	0.644982	0.576038	0.638417	0.600447	0.663499	0.584849	0.663956	0.692886	0.627117	0.653786	0.694917	0.609259	0.639128	0.704315			Wahed-Snyder	FAO56-PM
10	26	299	0.672782	0.609952	0.666002	0.535801	0.652892	0.677066	0.586208	0.624414	0.666224	0.654695	0.643624	0.598631	0.638188	0.609716	0.665995	0.619436	0.657627	0.660116	0.572817	0.643166	0.591836	0.611969	0.629962	0.736273		Mean	0.643603	0.740266
10	27	300	0.682952	0.630071	0.665773	0.596829	0.642494	0.602257	0.57174	0.634584	0.607442	0.630743	0.690404	0.657612	0.647907	0.535344	0.660566	0.616947	0.649333	0.629155	0.584627	0.638646	0.610846	0.606541	0.626946	0.721889		Known Variance	5.8e-05	0.005545
10	28	301	0.727701	0.661253	0.670064	0.665308	0.636393	0.625086	0.596607	0.660574	0.615802	0.635034	0.677752	0.645876	0.633217	0.544605	0.664185	0.615595	0.631637	0.591171	0.594701	0.601799	0.613106	0.651519	0.634499	0.630709		Observations	214	214
10	29	302	0.620787	0.600684	0.697635	0.658764	0.647915	0.541001	0.61174	0.604502	0.657856	0.653343	0.672102	0.672095	0.613993	0.532404	0.634126	0.612656	0.612649	0.620337	0.628697	0.676157	0.625765	0.649037	0.629284	0.70925		Hypothesized Mean Difference	0
10	30	303	0.671201	0.612663	0.649946	0.661704	0.527212	0.612885	0.665094	0.571725	0.691305	0.669156	0.672782	0.687014	0.606541	0.533305	0.623047	0.578069	0.660337	0.631186	0.652878	0.664636	0.614465	0.656268	0.632428	0.706783		z	-18.8963
10	31	304	0.676622	0.554332	0.615595	0.617183	0.593224	0.694016	0.639776	0.622375	0.654459	0.665322	0.658993	0.687465	0.579199	0.564502	0.621238	0.581009	0.662826	0.621169	0.630957	0.641807	0.621245	0.639311	0.62921	0.71285		P(Z<=z) one-tail	0
																								ymean=	0.643603	0.740266		z Critical one-tail	2.32635
																								var1	5.83601e-05			P(Z<=z) two-tail	0
																								var2		0.00554491		z Critical two-tail	2.57583
MO	DAY	DOY	1998	1999	2000	2001	2002	2003	2004	2005	2006	2007	2008	2009	2010	2011	2012	2013	2014	2015	2016	2017	2018	2019	Kp-Cuenca	Kp-FAO56-PM
4	1	91	0.773145	0.802548	0.776748	0.731468	0.774221	0.764773	0.726951	0.7585	0.755619	0.788369	0.824843	0.79453	0.784579	0.691899	0.764984	0.690089	0.719624	0.774598	0.764304	0.764452	0.777991	0.814293	0.764479	0.927909
4	2	92	0.795991	0.801777	0.71246	0.82856	0.813527	0.754188	0.739184	0.79196	0.830257	0.796379	0.774459	0.761763	0.78173	0.735577	0.734709	0.763862	0.717758	0.797471	0.686434	0.788369	0.779166	0.808684	0.772467	0.869866
4	3	93	0.804099	0.816756	0.819822	0.777991	0.801088	0.764889	0.641525	0.802488	0.769516	0.768723	0.783289	0.774379	0.759093	0.758224	0.763473	0.809264	0.767119	0.802437	0.719336	0.774598	0.752678	0.811782	0.774662	0.885078
4	4	94	0.749847	0.840365	0.84347	0.796543	0.811782	0.734882	0.592499	0.756615	0.780999	0.761724	0.796975	0.784777	0.746319	0.799635	0.748078	0.784761	0.794353	0.793616	0.726334	0.771993	0.661539	0.779586	0.766213	0.892517
4	5	95	0.793624	0.808216	0.840926	0.795587	0.791108	0.731509	0.674468	0.739921	0.807452	0.784579	0.795043	0.815126	0.681813	0.79283	0.671235	0.795152	0.786127	0.745591	0.705107	0.728075	0.720773	0.759723	0.761999	0.850662
4	6	96	0.793348	0.773175	0.809224	0.794436	0.82443	0.731744	0.730041	0.721301	0.806956	0.794436	0.759174	0.774814	0.724683	0.79491	0.690958	0.799118	0.734882	0.756133	0.689318	0.690089	0.717448	0.765683	0.758014	0.902761
4	7	97	0.793885	0.837179	0.791507	0.782403	0.795167	0.781372	0.758533	0.749996	0.832737	0.785632	0.756768	0.771457	0.782957	0.768237	0.739752	0.777393	0.714489	0.742765	0.771216	0.773472	0.719111	0.764981	0.772319	0.881945
4	8	98	0.792119	0.824826	0.798738	0.774741	0.802437	0.734864	0.746545	0.686946	0.820933	0.773505	0.786537	0.791507	0.767466	0.784319	0.747794	0.763862	0.741895	0.795152	0.767599	0.794394	0.774741	0.76083	0.77417	0.822579
4	9	99	0.782915	0.819822	0.817069	0.808677	0.757356	0.768852	0.718869	0.721342	0.739327	0.79058	0.808677	0.793165	0.762175	0.784551	0.736023	0.770302	0.777571	0.734282	0.716088	0.754464	0.813655	0.759252	0.769773	0.839593
4	10	100	0.784661	0.826687	0.760047	0.800136	0.717174	0.776504	0.707594	0.753349	0.814914	0.80462	0.821679	0.773972	0.764165	0.776543	0.745591	0.789684	0.792314	0.772815	0.762117	0.726334	0.815573	0.764468	0.775043	0.906924
4	11	101	0.76019	0.825946	0.808802	0.778164	0.726273	0.746686	0.731215	0.724438	0.809613	0.792389	0.744798	0.783289	0.768347	0.748457	0.788356	0.773519	0.783799	0.749476	0.796194	0.689318	0.805126	0.787935	0.769197	0.889757
4	12	102	0.736514	0.85763	0.736576	0.770622	0.794582	0.743349	0.751791	0.720638	0.833165	0.789949	0.786257	0.796893	0.755615	0.721576	0.787935	0.774741	0.751101	0.68953	0.814293	0.679478	0.816107	0.784579	0.76786	0.938682
4	13	103	0.731215	0.813535	0.759087	0.790988	0.816678	0.784945	0.774182	0.695201	0.829266	0.768943	0.79512	0.722436	0.750784	0.743167	0.785187	0.746582	0.777419	0.726417	0.797351	0.77122	0.809835	0.728853	0.769019	0.843122
4	14	104	0.760299	0.807411	0.809755	0.799316	0.809268	0.82362	0.797791	0.759723	0.733196	0.758	0.761839	0.758125	0.765223	0.746072	0.799269	0.779586	0.774459	0.733199	0.786987	0.810534	0.807775	0.727131	0.777663	0.830732
4	15	105	0.781168	0.802398	0.832387	0.778513	0.787784	0.842731	0.770926	0.778816	0.750675	0.785296	0.724438	0.794436	0.754681	0.742477	0.7824	0.768852	0.744798	0.734882	0.821995	0.832002	0.757861	0.773442	0.779226	0.814525
4	16	106	0.763765	0.798545	0.818603	0.798585	0.812971	0.815384	0.68844	0.81633	0.817299	0.748345	0.799316	0.812971	0.695354	0.772075	0.779785	0.78735	0.760211	0.698661	0.791108	0.804853	0.676436	0.817791	0.776099	0.946186
4	17	107	0.819755	0.79956	0.720773	0.786565	0.770622	0.805126	0.689693	0.807441	0.812108	0.75506	0.754405	0.824242	0.739569	0.731468	0.784945	0.782403	0.707799	0.776183	0.783159	0.792389	0.731423	0.778957	0.77062	0.827246
4	18	108	0.775499	0.796609	0.70933	0.779586	0.806161	0.79545	0.81678	0.812424	0.828923	0.762402	0.779004	0.764773	0.782957	0.711144	0.746319	0.796975	0.777943	0.786127	0.763919	0.776013	0.72787	0.787861	0.776548	0.897588
4	19	109	0.79791	0.817234	0.801107	0.779348	0.827769	0.759519	0.743349	0.782899	0.796379	0.723028	0.793165	0.763257	0.766481	0.77244	0.729115	0.808073	0.818232	0.796888	0.719428	0.779209	0.762175	0.777442	0.777929	0.873048
4	20	110	0.783862	0.818634	0.826373	0.790305	0.793813	0.806211	0.833868	0.770653	0.813379	0.761212	0.800166	0.756781	0.747494	0.758236	0.783388	0.807986	0.761476	0.774598	0.701805	0.786565	0.810554	0.761778	0.784052	0.849498
4	21	111	0.753882	0.809733	0.845841	0.785317	0.804265	0.806684	0.83303	0.770892	0.815529	0.754899	0.800166	0.753431	0.797467	0.759093	0.793813	0.799878	0.778816	0.785524	0.726437	0.794731	0.764119	0.690072	0.782892	0.8782
4	22	112	0.773972	0.762741	0.853876	0.731495	0.833042	0.796975	0.797791	0.809755	0.806956	0.744984	0.80177	0.77282	0.772815	0.827418	0.784761	0.788369	0.782002	0.73576	0.639475	0.731468	0.702578	0.674114	0.769315	0.906996
4	23	113	0.763392	0.779422	0.840524	0.764031	0.837734	0.804726	0.804853	0.790174	0.74435	0.738177	0.774879	0.791994	0.736338	0.806211	0.751359	0.784579	0.783799	0.733264	0.675155	0.720244	0.766212	0.687759	0.767235	0.900465
4	24	114	0.732789	0.763552	0.842272	0.749972	0.822765	0.742628	0.793359	0.772692	0.835232	0.660831	0.715516	0.802437	0.724752	0.799118	0.76769	0.759093	0.748035	0.739668	0.722768	0.700594	0.768943	0.723687	0.758563	0.912394
4	25	115	0.766911	0.727424	0.828549	0.759974	0.801962	0.828509	0.803193	0.798309	0.667675	0.709874	0.788316	0.797471	0.72982	0.770926	0.758689	0.717946	0.700594	0.749751	0.719599	0.743232	0.698332	0.720856	0.753996	0.830703
4	26	116	0.801885	0.74843	0.823821	0.778164	0.799118	0.796975	0.75156	0.790589	0.626415	0.7281	0.770892	0.806455	0.714591	0.776381	0.781585	0.705428	0.755032	0.710998	0.758224	0.721098	0.682312	0.741046	0.753141	0.867773
4	27	117	0.852524	0.7824	0.761763	0.7824	0.779757	0.712872	0.721966	0.806819	0.721098	0.734307	0.79428	0.803356	0.763228	0.747794	0.766734	0.701968	0.778816	0.724657	0.754725	0.672237	0.789578	0.744708	0.758999	0.859806
4	28	118	0.829266	0.786257	0.832258	0.677102	0.780623	0.75156	0.7629	0.811685	0.785952	0.766362	0.788159	0.787784	0.770682	0.729407	0.739879	0.679565	0.782957	0.708884	0.785204	0.685583	0.804287	0.722679	0.762229	0.790871
4	29	119	0.803926	0.807911	0.8299	0.698332	0.80062	0.791978	0.711888	0.777017	0.71632	0.79791	0.767197	0.798176	0.786038	0.771664	0.731509	0.688604	0.758551	0.720895	0.779586	0.748035	0.793782	0.719692	0.763615	0.786832
4	30	120	0.806412	0.789802	0.820137	0.683445	0.796975	0.782046	0.799269	0.81233	0.792583	0.783386	0.781523	0.810534	0.811782	0.779785	0.731509	0.694238	0.765314	0.774814	0.786987	0.754681	0.782711	0.71632	0.775299	0.758158
5	1	121	0.806795	0.776464	0.815201	0.748618	0.788518	0.717318	0.787079	0.820704	0.796194	0.791371	0.784945	0.816756	0.809264	0.794353	0.7281	0.717668	0.761476	0.767836	0.726436	0.7313	0.717981	0.760334	0.771123	0.90516
5	2	122	0.744977	0.76683	0.817024	0.650421	0.812971	0.659269	0.757158	0.769516	0.796095	0.787728	0.806956	0.779586	0.789177	0.773472	0.791108	0.677102	0.759456	0.777984	0.769966	0.77562	0.73463	0.742129	0.760872	0.854409
5	3	123	0.737905	0.795991	0.808216	0.738269	0.792389	0.696211	0.836315	0.734884	0.792785	0.748289	0.800136	0.780757	0.779758	0.785673	0.813001	0.724702	0.778513	0.80172	0.782511	0.797805	0.69715	0.761775	0.772034	0.735723
5	4	124	0.724225	0.783806	0.788369	0.751237	0.796975	0.694582	0.816163	0.717983	0.772222	0.752515	0.773746	0.781871	0.785673	0.779209	0.830318	0.757356	0.762379	0.769993	0.744775	0.789743	0.701805	0.748653	0.764709	0.907655
5	5	125	0.724525	0.76019	0.824356	0.763045	0.788369	0.713541	0.807775	0.743319	0.77593	0.779757	0.80462	0.750151	0.784319	0.787861	0.804962	0.760211	0.684604	0.749516	0.782393	0.799118	0.778816	0.758898	0.769376	0.821132
5	6	126	0.784263	0.755163	0.848545	0.768723	0.744984	0.724339	0.791575	0.822765	0.786369	0.72969	0.786732	0.833286	0.789297	0.790175	0.796483	0.755664	0.789191	0.743088	0.80172	0.79999	0.794656	0.681845	0.778115	0.774759
5	7	127	0.778201	0.809245	0.827799	0.791934	0.744984	0.594788	0.783007	0.804206	0.771993	0.701968	0.718978	0.814293	0.790175	0.790174	0.784197	0.755619	0.777699	0.722852	0.787019	0.777168	0.807411	0.737228	0.766861	0.818628
5	8	128	0.751813	0.756516	0.793624	0.833042	0.738269	0.641525	0.808073	0.785296	0.772049	0.766041	0.836084	0.801978	0.789297	0.749641	0.779947	0.764724	0.81233	0.712954	0.789191	0.79629	0.803561	0.725576	0.773083	0.779543
5	9	129	0.736464	0.814825	0.787325	0.825032	0.724598	0.661683	0.803788	0.790175	0.757539	0.804287	0.810928	0.789504	0.802786	0.763473	0.759438	0.776381	0.804945	0.77024	0.758	0.790589	0.804853	0.739327	0.77619	0.885284
5	10	130	0.780938	0.797791	0.725114	0.831148	0.711888	0.656371	0.717983	0.790305	0.776504	0.793878	0.764452	0.770689	0.736475	0.758898	0.735741	0.772979	0.787393	0.756945	0.738252	0.719673	0.807775	0.754725	0.758451	0.852138
5	11	131	0.814249	0.779221	0.755214	0.85162	0.71923	0.672119	0.78901	0.733045	0.788159	0.835467	0.7824	0.776768	0.729596	0.772815	0.752515	0.796194	0.78173	0.784197	0.79283	0.782899	0.779947	0.767394	0.774392	0.750169
5	12	132	0.77149	0.765195	0.763655	0.796095	0.786435	0.692657	0.806819	0.731215	0.749996	0.807452	0.788029	0.764475	0.766756	0.747322	0.788356	0.804853	0.782002	0.757356	0.784319	0.77562	0.795152	0.727801	0.770593	0.857878
5	13	133	0.816163	0.800423	0.810617	0.771664	0.800136	0.701941	0.784319	0.784579	0.793782	0.814249	0.751791	0.758533	0.779785	0.791003	0.771216	0.773175	0.786537	0.776734	0.791003	0.769453	0.778816	0.702728	0.777666	0.858547
5	14	134	0.827384	0.819857	0.810617	0.77328	0.811796	0.746319	0.77149	0.756516	0.736572	0.806699	0.790305	0.733045	0.782403	0.794656	0.780999	0.779947	0.78735	0.776225	0.784945	0.774598	0.777799	0.692304	0.777959	0.843144
5	15	135	0.816678	0.804206	0.827799	0.825844	0.796975	0.792389	0.808677	0.726197	0.701025	0.789191	0.783159	0.746686	0.789191	0.781372	0.784319	0.773847	0.795632	0.763544	0.773249	0.760432	0.795632	0.688871	0.778405	0.826279
5	16	136	0.814257	0.814277	0.820137	0.821739	0.767197	0.783852	0.766209	0.807775	0.783799	0.768237	0.807452	0.780938	0.797791	0.76083	0.776183	0.779209	0.784579	0.787393	0.769731	0.766734	0.772979	0.674558	0.782084	0.856515
5	17	137	0.814747	0.817964	0.85357	0.754899	0.7649	0.71482	0.822376	0.763045	0.837545	0.816163	0.819242	0.758125	0.780293	0.69355	0.769993	0.791994	0.785204	0.766362	0.780704	0.731493	0.739879	0.728853	0.777533	0.813382
5	18	138	0.800136	0.799973	0.796309	0.731367	0.807156	0.713541	0.762096	0.696772	0.802443	0.838026	0.808786	0.751791	0.772391	0.704398	0.737856	0.790649	0.751226	0.741656	0.761438	0.734864	0.706928	0.724981	0.760672	0.779761
5	19	139	0.814914	0.771253	0.805615	0.718978	0.803788	0.767405	0.790988	0.75156	0.773972	0.792091	0.825502	0.748035	0.770622	0.769249	0.759974	0.789297	0.774226	0.687678	0.77244	0.756718	0.697741	0.767394	0.768611	0.869613
5	20	140	0.806425	0.603695	0.817459	0.722671	0.810534	0.770689	0.736581	0.745018	0.799269	0.750408	0.819618	0.794731	0.777699	0.739455	0.762402	0.767971	0.771395	0.707847	0.769966	0.806425	0.729743	0.782957	0.763316	0.768444
5	21	141	0.802261	0.691698	0.819293	0.72787	0.786987	0.802786	0.72256	0.778267	0.80172	0.792465	0.807911	0.790174	0.772692	0.761775	0.789684	0.766212	0.771743	0.755805	0.789743	0.788834	0.739962	0.772815	0.774239	0.73818
5	22	142	0.829334	0.727122	0.816574	0.705952	0.78599	0.797805	0.792785	0.780293	0.806455	0.783007	0.819276	0.806956	0.747651	0.757158	0.78061	0.776013	0.749376	0.769849	0.777393	0.810554	0.782789	0.731744	0.778849	0.757685
5	23	143	0.831119	0.748429	0.819618	0.72049	0.80435	0.766973	0.792465	0.793329	0.801088	0.783159	0.80185	0.793359	0.76708	0.74146	0.779348	0.769731	0.736523	0.776925	0.771642	0.79545	0.723022	0.760639	0.776275	0.717349
5	24	144	0.80281	0.781523	0.815625	0.699981	0.776225	0.774182	0.776504	0.786369	0.720773	0.777017	0.814293	0.806136	0.758224	0.743088	0.761778	0.777699	0.753459	0.795152	0.766414	0.789684	0.795625	0.687088	0.770893	0.782728
5	25	145	0.793624	0.784446	0.806545	0.595071	0.775009	0.753882	0.776768	0.795632	0.667714	0.775261	0.823941	0.79292	0.761724	0.753882	0.76718	0.731426	0.759456	0.777984	0.765294	0.791551	0.790669	0.715078	0.761593	0.831865
5	26	146	0.775018	0.838454	0.773412	0.722436	0.726108	0.758464	0.767405	0.796095	0.79428	0.793359	0.809835	0.751237	0.766209	0.763862	0.770653	0.772815	0.786565	0.764031	0.778816	0.770926	0.762968	0.764165	0.773051	0.730991
5	27	147	0.748348	0.755194	0.76683	0.729542	0.774741	0.774741	0.786369	0.733072	0.792314	0.792389	0.806455	0.679345	0.724734	0.782511	0.78061	0.785673	0.797284	0.773847	0.767971	0.787861	0.754986	0.71281	0.763983	0.688312
5	28	148	0.788518	0.727122	0.768456	0.72969	0.785187	0.790174	0.788862	0.788834	0.792465	0.789684	0.775261	0.688855	0.777071	0.78735	0.786987	0.772815	0.771216	0.763862	0.796483	0.769453	0.741581	0.70082	0.767307	0.76193
5	29	149	0.812971	0.797391	0.813821	0.74146	0.791978	0.800999	0.793359	0.798585	0.753349	0.789191	0.800136	0.688604	0.787393	0.781585	0.752515	0.775295	0.778816	0.753599	0.79428	0.786565	0.752515	0.696121	0.77457	0.775264
5	30	150	0.814825	0.803007	0.807822	0.778513	0.772391	0.792035	0.780938	0.827769	0.785952	0.751467	0.674468	0.726273	0.767836	0.778513	0.740199	0.733189	0.786565	0.80172	0.805587	0.771743	0.80172	0.712954	0.773431	0.753812
5	31	151	0.830501	0.808786	0.790085	0.779469	0.770926	0.822445	0.816964	0.850664	0.754681	0.787019	0.709874	0.733179	0.755977	0.777071	0.76819	0.745926	0.786737	0.788862	0.798036	0.790484	0.799269	0.743667	0.782219	0.700487
6	1	152	0.824242	0.813289	0.765195	0.688783	0.816093	0.798797	0.777799	0.829838	0.804853	0.792465	0.783007	0.759273	0.744927	0.765928	0.771743	0.777544	0.779348	0.74146	0.804287	0.788788	0.788369	0.72929	0.779333	0.774004
6	2	153	0.822965	0.796379	0.798089	0.673345	0.758	0.811118	0.804099	0.812236	0.779166	0.795587	0.814293	0.748134	0.755418	0.77122	0.758898	0.784197	0.779259	0.754725	0.799878	0.789297	0.794731	0.764638	0.780258	0.737889
6	3	154	0.821464	0.791978	0.787411	0.762741	0.720895	0.785632	0.795975	0.800591	0.790305	0.80062	0.816163	0.779469	0.782511	0.768529	0.734882	0.769249	0.762968	0.788356	0.833165	0.788369	0.791551	0.780704	0.784251	0.796476
6	4	155	0.805171	0.810123	0.801024	0.790988	0.75156	0.785952	0.789949	0.808289	0.801541	0.805126	0.82158	0.791994	0.768852	0.783386	0.788369	0.762096	0.752826	0.783697	0.785673	0.786987	0.79428	0.776616	0.788458	0.681514
6	5	156	0.740219	0.798309	0.812002	0.782957	0.788788	0.734882	0.774379	0.78599	0.81039	0.806956	0.808289	0.781573	0.784718	0.780205	0.741394	0.752975	0.726953	0.790175	0.781585	0.795975	0.791782	0.761775	0.77874	0.745815
6	6	157	0.810183	0.812971	0.810616	0.753266	0.766973	0.632747	0.789949	0.776734	0.790484	0.805615	0.814293	0.770926	0.783862	0.765314	0.741394	0.769616	0.813272	0.793779	0.789177	0.780704	0.772979	0.745591	0.776838	0.740936
6	7	158	0.809733	0.821771	0.812236	0.739949	0.749996	0.678948	0.768487	0.754899	0.793779	0.775935	0.823586	0.76545	0.760334	0.777419	0.743237	0.739327	0.803104	0.787485	0.788114	0.795152	0.762567	0.734307	0.772083	0.746649
6	8	159	0.819293	0.812236	0.812447	0.77593	0.720154	0.818032	0.787019	0.795632	0.790484	0.786369	0.817791	0.736581	0.769966	0.775629	0.721301	0.774161	0.788369	0.779586	0.784579	0.765223	0.724525	0.707799	0.775596	0.708193
6	9	160	0.817459	0.818645	0.75506	0.759438	0.692952	0.802261	0.77024	0.791551	0.746203	0.842374	0.814249	0.726108	0.77244	0.777544	0.747922	0.724752	0.790174	0.758564	0.786987	0.76769	0.774954	0.729596	0.771235	0.743919
6	10	161	0.822782	0.817234	0.763479	0.731465	0.688783	0.81678	0.746641	0.806699	0.739949	0.798545	0.82472	0.727948	0.777088	0.772815	0.752678	0.769616	0.790175	0.765746	0.786537	0.779758	0.786986	0.754575	0.773682	0.753833
6	11	162	0.837398	0.815384	0.750123	0.715516	0.765314	0.808677	0.748219	0.797805	0.739823	0.783388	0.788862	0.801962	0.757158	0.754188	0.776183	0.768852	0.786823	0.778427	0.791234	0.766414	0.784446	0.757893	0.776095	0.754029
6	12	163	0.827252	0.801541	0.781521	0.696772	0.768529	0.798354	0.775261	0.788356	0.762567	0.79292	0.757708	0.803704	0.719507	0.784993	0.781152	0.767394	0.782899	0.77244	0.805403	0.785673	0.779785	0.769966	0.777441	0.744294
6	13	164	0.824092	0.79428	0.589477	0.707817	0.776225	0.794582	0.784176	0.800952	0.786127	0.787079	0.785632	0.802261	0.742765	0.794353	0.78061	0.779785	0.773519	0.782957	0.800136	0.789177	0.796194	0.781585	0.775172	0.727806
6	14	165	0.812447	0.861536	0.598566	0.751639	0.762741	0.790988	0.796543	0.775009	0.782002	0.802443	0.815413	0.808677	0.767625	0.786537	0.782002	0.764165	0.762968	0.785204	0.788369	0.805587	0.811183	0.77328	0.781133	0.765
6	15	166	0.821103	0.816964	0.670123	0.769453	0.784579	0.794731	0.778847	0.799635	0.765662	0.801088	0.819686	0.795167	0.769849	0.786127	0.761169	0.763544	0.786537	0.773017	0.766481	0.794656	0.801162	0.765828	0.781155	0.788429
6	16	167	0.813379	0.804608	0.698525	0.785187	0.785596	0.798797	0.795975	0.784945	0.791978	0.805126	0.799389	0.704735	0.763211	0.782002	0.756077	0.769249	0.777984	0.778816	0.788356	0.786987	0.777699	0.779261	0.77854	0.738155
6	17	168	0.804269	0.79128	0.796893	0.668994	0.79491	0.798309	0.783386	0.748134	0.787079	0.803295	0.817975	0.729782	0.726415	0.786537	0.752903	0.754725	0.780205	0.774226	0.728487	0.773175	0.794144	0.786038	0.771871	0.777296
6	18	169	0.816574	0.795991	0.818032	0.77024	0.777799	0.790174	0.794731	0.805403	0.769993	0.808289	0.784945	0.795632	0.751938	0.772918	0.693701	0.737958	0.782957	0.782899	0.634382	0.791234	0.806819	0.803704	0.776651	0.718831
6	19	170	0.81564	0.808289	0.7122	0.787393	0.608874	0.793782	0.805937	0.804287	0.756516	0.805126	0.705274	0.749751	0.773017	0.783862	0.747651	0.638913	0.77244	0.760334	0.682892	0.787641	0.796748	0.789743	0.758469	0.765461
6	20	171	0.827973	0.795991	0.661683	0.793359	0.646767	0.794656	0.780205	0.800627	0.777991	0.784945	0.786732	0.796975	0.773839	0.770302	0.768529	0.658848	0.764889	0.765683	0.701441	0.744742	0.791003	0.800588	0.76308	0.673799
6	21	172	0.813289	0.806088	0.74661	0.77149	0.652776	0.804962	0.802786	0.804962	0.781372	0.724525	0.800166	0.80435	0.775629	0.768852	0.74386	0.701968	0.767625	0.774814	0.769453	0.777419	0.783388	0.784216	0.770936	0.705481
6	22	173	0.804099	0.814249	0.7619	0.751715	0.787079	0.80185	0.803295	0.780999	0.79745	0.705107	0.775929	0.812826	0.753882	0.75095	0.762096	0.717758	0.779785	0.777023	0.770302	0.752826	0.784216	0.797284	0.774665	0.697045
6	23	174	0.799973	0.788356	0.771411	0.78599	0.781372	0.786732	0.790174	0.657245	0.798036	0.751704	0.676919	0.821739	0.739487	0.744603	0.765314	0.745926	0.762968	0.771642	0.786127	0.781372	0.790175	0.776616	0.766995	0.717192
6	24	175	0.773286	0.800952	0.774879	0.79745	0.789578	0.771749	0.792389	0.746641	0.806136	0.718978	0.726273	0.79745	0.721291	0.758689	0.771395	0.721381	0.758224	0.768469	0.782511	0.773519	0.796748	0.765828	0.76881	0.694349
6	25	176	0.822782	0.799118	0.803193	0.783799	0.800952	0.683254	0.801962	0.792465	0.807986	0.769339	0.791739	0.791978	0.76033	0.760666	0.777419	0.777023	0.756718	0.775229	0.781585	0.76769	0.781585	0.773472	0.780013	0.713418
6	26	177	0.803789	0.788159	0.819083	0.792465	0.802786	0.786369	0.796543	0.789297	0.813001	0.699981	0.790988	0.800627	0.765683	0.758548	0.756718	0.775229	0.759723	0.760006	0.785524	0.783799	0.804962	0.776183	0.782248	0.701457
6	27	178	0.805601	0.795994	0.816454	0.803295	0.796543	0.804853	0.799635	0.769993	0.810448	0.768943	0.793359	0.783388	0.759174	0.750322	0.770259	0.779348	0.739752	0.777023	0.749476	0.778816	0.785187	0.769856	0.782169	0.721469
6	28	179	0.776464	0.795759	0.82738	0.807245	0.795632	0.807245	0.795152	0.796975	0.803104	0.787784	0.823474	0.805557	0.768867	0.761212	0.77244	0.766414	0.726382	0.764452	0.766756	0.786823	0.790175	0.761778	0.785776	0.647736
6	29	180	0.787554	0.809268	0.816964	0.76545	0.789743	0.798797	0.648589	0.786565	0.82664	0.800136	0.819857	0.810554	0.770302	0.757415	0.734824	0.764638	0.739752	0.763862	0.768852	0.788654	0.773436	0.738773	0.775483	0.771544
6	30	181	0.799237	0.790305	0.805364	0.711888	0.78173	0.794656	0.692657	0.788356	0.805126	0.801162	0.809087	0.806699	0.764165	0.766414	0.722979	0.771642	0.783862	0.762402	0.773175	0.780205	0.749732	0.697069	0.770814	0.769558
7	1	182	0.806987	0.807441	0.790353	0.780999	0.79745	0.791108	0.788862	0.803104	0.808073	0.786369	0.771749	0.802261	0.787935	0.771032	0.681545	0.732591	0.772049	0.774598	0.765928	0.729508	0.788369	0.598602	0.76986	0.693883
7	2	183	0.795994	0.814249	0.813821	0.796748	0.796543	0.789191	0.73826	0.804287	0.797284	0.798585	0.817402	0.810554	0.76819	0.778408	0.62465	0.733125	0.781152	0.786537	0.76819	0.699383	0.791108	0.728487	0.774189	0.693069
7	3	184	0.767943	0.818634	0.785798	0.80185	0.796543	0.778267	0.764119	0.792314	0.790175	0.792465	0.817975	0.811782	0.777023	0.778444	0.632629	0.747651	0.769966	0.777419	0.765683	0.774598	0.789297	0.772815	0.777427	0.668761
7	4	185	0.797791	0.817964	0.76361	0.782002	0.787784	0.809264	0.787393	0.784718	0.809245	0.799635	0.798354	0.80172	0.77244	0.771642	0.683703	0.756718	0.777544	0.77574	0.774383	0.784718	0.776381	0.776381	0.781324	0.692928
7	5	186	0.821294	0.809613	0.77514	0.790175	0.78599	0.802261	0.7824	0.780999	0.809934	0.79283	0.817975	0.825502	0.771032	0.776013	0.742887	0.772815	0.774814	0.784216	0.769528	0.782899	0.778408	0.762234	0.786771	0.655312
7	6	187	0.837261	0.81678	0.78447	0.785204	0.782073	0.809934	0.756615	0.792465	0.804099	0.791551	0.825369	0.812424	0.773017	0.771743	0.732716	0.777544	0.756217	0.783862	0.767836	0.78572	0.772815	0.744081	0.784718	0.765681
7	7	188	0.844179	0.79419	0.80281	0.792314	0.791978	0.806699	0.781238	0.804962	0.769149	0.794144	0.802443	0.803704	0.770781	0.775629	0.762693	0.766756	0.763544	0.776183	0.789948	0.765928	0.783862	0.738773	0.785541	0.736938
7	8	189	0.818295	0.807411	0.786016	0.780999	0.784761	0.799635	0.796095	0.811183	0.779469	0.777393	0.724598	0.817975	0.774814	0.784761	0.74231	0.777799	0.762402	0.771642	0.778896	0.744484	0.789684	0.743012	0.779711	0.759695
7	9	190	0.805615	0.806956	0.775017	0.76545	0.783799	0.79283	0.800423	0.800952	0.787784	0.764304	0.82115	0.819857	0.770259	0.773175	0.763544	0.77244	0.774814	0.762497	0.759974	0.741282	0.787861	0.765294	0.781603	0.695459
7	10	191	0.795664	0.813289	0.82738	0.79292	0.777799	0.804265	0.778528	0.807452	0.804853	0.787079	0.825502	0.825369	0.772391	0.762096	0.770622	0.767466	0.772049	0.779758	0.766756	0.752337	0.784761	0.769369	0.788078	0.737591
7	11	192	0.805601	0.810928	0.832391	0.795152	0.791108	0.794731	0.78173	0.805557	0.809934	0.79292	0.816107	0.818497	0.767971	0.759174	0.752337	0.771642	0.779348	0.782899	0.755418	0.772815	0.781152	0.76624	0.788348	0.721957
7	12	193	0.786546	0.810928	0.822478	0.793813	0.799635	0.794656	0.796975	0.808677	0.799118	0.796975	0.819857	0.811641	0.76819	0.769616	0.767394	0.77528	0.780704	0.778427	0.736475	0.77244	0.76708	0.77122	0.787642	0.732889
7	13	194	0.801393	0.806088	0.815201	0.791108	0.795167	0.789177	0.799635	0.803704	0.796748	0.796543	0.823103	0.801247	0.762402	0.778408	0.755805	0.776183	0.764889	0.766756	0.741378	0.773839	0.75797	0.772131	0.784949	0.747561
7	14	195	0.814277	0.805126	0.828549	0.803704	0.802443	0.803104	0.802261	0.801206	0.805587	0.79745	0.816607	0.841647	0.77244	0.775629	0.764165	0.780704	0.770781	0.768565	0.781152	0.779348	0.78735	0.787641	0.794988	0.699742
7	15	196	0.802804	0.807775	0.823537	0.805557	0.796975	0.808073	0.758564	0.79629	0.806136	0.788159	0.806819	0.789949	0.775629	0.783388	0.756718	0.777984	0.768867	0.772075	0.785204	0.783388	0.777544	0.775641	0.788503	0.711751
7	16	197	0.819083	0.812971	0.80963	0.808073	0.798797	0.800423	0.770472	0.785673	0.811796	0.696099	0.811118	0.820387	0.755202	0.768867	0.752515	0.78108	0.752711	0.774226	0.788654	0.787485	0.771395	0.771395	0.784002	0.702154
7	17	198	0.816454	0.803193	0.813379	0.804853	0.786369	0.800423	0.753183	0.780938	0.811782	0.615919	0.810554	0.825502	0.769966	0.736143	0.770926	0.767625	0.755944	0.768775	0.785524	0.772391	0.771642	0.758877	0.77638	0.68407
7	18	199	0.821979	0.827384	0.817459	0.79283	0.790988	0.790174	0.773505	0.798309	0.807411	0.661733	0.814003	0.82158	0.763544	0.764277	0.788788	0.76624	0.771032	0.761248	0.771032	0.774954	0.782612	0.80435	0.784792	0.669867
7	19	200	0.819768	0.798354	0.816574	0.793813	0.800952	0.788369	0.739949	0.802261	0.804853	0.700314	0.806211	0.817299	0.771642	0.768769	0.779517	0.740906	0.760006	0.750708	0.778896	0.765314	0.768469	0.78057	0.779705	0.708519
7	20	201	0.82331	0.810928	0.806014	0.801962	0.779166	0.776504	0.788518	0.786369	0.798585	0.779757	0.814211	0.817791	0.758564	0.765314	0.735399	0.766756	0.761775	0.769453	0.754464	0.747494	0.777984	0.757975	0.780832	0.728536
7	21	202	0.817024	0.796752	0.799868	0.791994	0.795587	0.802907	0.786565	0.806699	0.801247	0.80172	0.814878	0.797284	0.766679	0.764277	0.777984	0.766056	0.756798	0.774263	0.773935	0.765928	0.787019	0.734459	0.785451	0.669483
7	22	203	0.823821	0.77456	0.807161	0.80252	0.796543	0.804206	0.782073	0.809318	0.811123	0.800952	0.823201	0.802437	0.761086	0.769249	0.736023	0.760933	0.763544	0.773097	0.745401	0.779785	0.752145	0.70247	0.780984	0.675015
7	23	204	0.816107	0.799726	0.805364	0.79419	0.799118	0.791575	0.777991	0.803104	0.815413	0.800136	0.820866	0.802261	0.762117	0.767862	0.769731	0.762402	0.775229	0.775935	0.774226	0.777419	0.783697	0.737004	0.786885	0.678472
7	24	205	0.833655	0.804726	0.81564	0.796095	0.704035	0.770074	0.793782	0.798036	0.814293	0.805126	0.818634	0.815529	0.757533	0.769966	0.777419	0.7577	0.77574	0.770667	0.745591	0.765314	0.784446	0.763421	0.783519	0.681487
7	25	206	0.834911	0.816107	0.804358	0.786987	0.694006	0.805364	0.780999	0.813001	0.80462	0.798354	0.820866	0.795632	0.758877	0.772815	0.786127	0.753459	0.768867	0.753141	0.750408	0.774226	0.779502	0.769249	0.782813	0.686832
7	26	207	0.832387	0.828022	0.810396	0.792465	0.777071	0.796309	0.802443	0.814878	0.814878	0.803788	0.795975	0.799878	0.774814	0.772075	0.776666	0.733072	0.76033	0.764201	0.771395	0.777023	0.770653	0.721159	0.785904	0.67525
7	27	208	0.82331	0.824242	0.803926	0.79745	0.780623	0.799868	0.807245	0.809318	0.806819	0.802443	0.800136	0.803561	0.772049	0.766212	0.7515	0.756945	0.766262	0.776427	0.78205	0.78205	0.762402	0.73662	0.786884	0.691759
7	28	209	0.811438	0.816163	0.809224	0.814249	0.792389	0.806014	0.809087	0.809934	0.798036	0.804726	0.819857	0.806699	0.750408	0.780205	0.765709	0.712665	0.774226	0.783432	0.782511	0.756798	0.762862	0.764432	0.787776	0.685484
7	29	210	0.82064	0.801978	0.814416	0.801962	0.783289	0.79512	0.792389	0.807411	0.782403	0.731298	0.822957	0.696099	0.753459	0.776381	0.760773	0.661539	0.771642	0.779821	0.777799	0.750408	0.776183	0.763507	0.773703	0.73342
7	30	211	0.82064	0.810616	0.813004	0.819185	0.781238	0.806795	0.806956	0.811123	0.779586	0.7824	0.819276	0.796975	0.757158	0.773847	0.757925	0.721301	0.770653	0.766262	0.779348	0.753882	0.786038	0.782002	0.786191	0.671301
7	31	212	0.826481	0.814612	0.806412	0.801465	0.766209	0.827799	0.80462	0.80832	0.800952	0.804853	0.807775	0.806136	0.762968	0.770622	0.754491	0.747135	0.773436	0.772075	0.771743	0.779785	0.777544	0.787861	0.789695	0.632091
8	1	213	0.815201	0.804726	0.784263	0.791507	0.789191	0.827799	0.796975	0.81517	0.804962	0.805126	0.814249	0.804853	0.803561	0.773175	0.72463	0.770653	0.787898	0.772391	0.759273	0.810554	0.788114	0.770653	0.791588	0.625102
8	2	214	0.823821	0.824242	0.733103	0.795632	0.764638	0.817024	0.790174	0.800423	0.813655	0.806136	0.816163	0.79745	0.759174	0.765628	0.761007	0.768529	0.782926	0.759273	0.734709	0.772049	0.787861	0.782403	0.784365	0.713448
8	3	215	0.821127	0.811451	0.652889	0.79791	0.783159	0.829838	0.802786	0.793782	0.814914	0.798309	0.818032	0.79428	0.776013	0.754971	0.717983	0.75797	0.762862	0.728063	0.777544	0.77528	0.786038	0.770781	0.778454	0.661205
8	4	216	0.811438	0.815384	0.686147	0.804099	0.797391	0.829109	0.793782	0.785296	0.824843	0.795975	0.811641	0.771749	0.781152	0.763211	0.762693	0.751938	0.770259	0.719507	0.772049	0.766414	0.783163	0.773935	0.780508	0.630157
8	5	217	0.796926	0.816107	0.766802	0.801162	0.798309	0.825155	0.801088	0.811796	0.819185	0.798036	0.811183	0.815519	0.765628	0.760334	0.759974	0.73137	0.766756	0.768852	0.787861	0.771395	0.779348	0.764277	0.787139	0.675575
8	6	218	0.768627	0.807911	0.795415	0.806819	0.781372	0.818603	0.803561	0.799316	0.800952	0.798036	0.813655	0.816607	0.760933	0.748869	0.756945	0.737958	0.761399	0.77122	0.783942	0.759974	0.78057	0.721788	0.781567	0.658337
8	7	219	0.748293	0.796379	0.811438	0.799269	0.7824	0.795415	0.807245	0.782957	0.81233	0.783386	0.811118	0.818232	0.742995	0.758224	0.766481	0.769616	0.777023	0.756798	0.772582	0.763919	0.776183	0.693654	0.778452	0.667123
8	8	220	0.666144	0.806545	0.815201	0.814293	0.78735	0.829838	0.804287	0.790649	0.81233	0.788788	0.813049	0.812424	0.745766	0.751938	0.72116	0.753882	0.765294	0.777799	0.75931	0.744874	0.767836	0.717134	0.774813	0.668639
8	9	221	0.75667	0.806455	0.803926	0.80062	0.787485	0.831704	0.80062	0.808677	0.795632	0.800136	0.817975	0.809087	0.760933	0.762402	0.753678	0.752337	0.776183	0.771642	0.778427	0.782002	0.758689	0.756768	0.785093	0.672589
8	10	222	0.796309	0.807911	0.817024	0.794582	0.790988	0.824632	0.810534	0.809318	0.812392	0.80062	0.818497	0.729782	0.755202	0.77244	0.759723	0.759723	0.770653	0.768055	0.791234	0.789177	0.763228	0.752788	0.786128	0.635623
8	11	223	0.81564	0.814747	0.811438	0.804099	0.795167	0.799973	0.795625	0.803561	0.814878	0.801465	0.816093	0.710542	0.770302	0.773017	0.760933	0.780704	0.764984	0.760718	0.781333	0.76819	0.764981	0.721107	0.783159	0.692284
8	12	224	0.806795	0.807911	0.822478	0.804099	0.759589	0.807161	0.768723	0.79745	0.814293	0.812971	0.822038	0.731423	0.761212	0.754347	0.76064	0.772049	0.777544	0.771642	0.773017	0.774598	0.758464	0.748261	0.782123	0.676057
8	13	225	0.807273	0.81277	0.819982	0.802786	0.787784	0.801343	0.772222	0.791551	0.808677	0.796095	0.82472	0.786732	0.768852	0.73463	0.731216	0.775629	0.771395	0.771032	0.780205	0.774814	0.747494	0.782511	0.784078	0.667333
8	14	226	0.78931	0.813289	0.821127	0.789191	0.788114	0.779938	0.792785	0.798309	0.810554	0.803295	0.821071	0.796095	0.773175	0.75797	0.753225	0.759974	0.777419	0.771743	0.774598	0.767836	0.776013	0.79283	0.786721	0.712442
8	15	227	0.816107	0.822376	0.778247	0.796975	0.778513	0.750033	0.797805	0.798309	0.80462	0.807775	0.821739	0.811118	0.756475	0.762693	0.76064	0.761476	0.780205	0.777544	0.784718	0.785673	0.787485	0.77574	0.787103	0.690976
8	16	228	0.790843	0.814612	0.758609	0.793782	0.802437	0.765321	0.790174	0.810554	0.814249	0.79791	0.801962	0.811796	0.753882	0.769966	0.742765	0.759723	0.775229	0.773847	0.78086	0.77244	0.788834	0.768469	0.783557	0.616909
8	17	229	0.779849	0.822239	0.812847	0.787935	0.787935	0.810021	0.800136	0.798309	0.799726	0.801465	0.811451	0.809934	0.747494	0.759174	0.741282	0.753459	0.817299	0.750784	0.775102	0.765314	0.786537	0.76624	0.785661	0.698461
8	18	230	0.790843	0.810617	0.821127	0.777799	0.825502	0.811438	0.786369	0.795152	0.796975	0.79292	0.807911	0.814914	0.751715	0.747135	0.739569	0.754971	0.750675	0.771743	0.772075	0.777023	0.779785	0.769849	0.783914	0.677407
8	19	231	0.8299	0.794833	0.818802	0.799269	0.803356	0.796926	0.807245	0.799635	0.810534	0.795632	0.807441	0.813657	0.764452	0.744038	0.741282	0.741282	0.773017	0.769453	0.783386	0.759174	0.773175	0.759665	0.785734	0.668087
8	20	232	0.826687	0.815927	0.819768	0.788788	0.801962	0.821127	0.795167	0.806136	0.773746	0.804287	0.79453	0.786732	0.747794	0.758464	0.719624	0.753678	0.744038	0.775629	0.782403	0.760211	0.781585	0.745977	0.782012	0.74266
8	21	233	0.822782	0.811556	0.811584	0.793782	0.796095	0.82738	0.789191	0.800136	0.793782	0.790988	0.794582	0.736576	0.742887	0.741282	0.649636	0.767083	0.774598	0.763862	0.773519	0.757158	0.787019	0.74386	0.775879	0.723216
8	22	234	0.826687	0.811957	0.796926	0.782711	0.795167	0.816107	0.79745	0.792785	0.802786	0.805126	0.79745	0.759725	0.733189	0.741171	0.723022	0.775229	0.781585	0.760933	0.760432	0.759974	0.792314	0.732796	0.779342	0.718185
8	23	235	0.831704	0.816454	0.827799	0.792389	0.799726	0.80281	0.802786	0.804853	0.794731	0.756516	0.801088	0.762741	0.717897	0.742765	0.733125	0.771032	0.767083	0.768852	0.769731	0.765628	0.789684	0.693801	0.777873	0.729479
8	24	236	0.83041	0.769677	0.824632	0.791978	0.782711	0.802479	0.803788	0.805557	0.80062	0.704529	0.806211	0.772222	0.742477	0.742765	0.737958	0.782511	0.779209	0.791003	0.760432	0.784761	0.794144	0.691043	0.777324	0.649032
8	25	237	0.83041	0.802443	0.817024	0.801962	0.775009	0.82331	0.778528	0.793813	0.794582	0.759847	0.809733	0.807411	0.744038	0.755418	0.759456	0.772075	0.769731	0.751101	0.762968	0.784761	0.790649	0.748229	0.783295	0.716508
8	26	238	0.832988	0.751817	0.798545	0.79745	0.772222	0.816964	0.773505	0.77593	0.809264	0.778528	0.791575	0.807245	0.756475	0.741378	0.766212	0.772075	0.779209	0.700154	0.789297	0.778847	0.790175	0.786565	0.780292	0.704226
8	27	239	0.827799	0.734459	0.814248	0.772222	0.738235	0.829838	0.799269	0.783799	0.798309	0.794731	0.770074	0.780623	0.733125	0.749222	0.758689	0.773175	0.785673	0.728063	0.779209	0.768852	0.768852	0.773175	0.775529	0.703668
8	28	240	0.839852	0.708225	0.69332	0.800136	0.720773	0.831119	0.796095	0.799118	0.803561	0.801088	0.81039	0.791371	0.742628	0.765314	0.762968	0.782002	0.770302	0.738177	0.776734	0.773839	0.785187	0.739487	0.774168	0.641968
8	29	241	0.832988	0.703576	0.724492	0.790174	0.767971	0.822478	0.789743	0.801962	0.79545	0.772222	0.807441	0.805937	0.765314	0.762968	0.728123	0.782957	0.772815	0.731508	0.766734	0.767466	0.772979	0.776183	0.774613	0.686054
8	30	242	0.833655	0.750107	0.766802	0.790175	0.789191	0.824632	0.807775	0.753183	0.786732	0.798783	0.807245	0.817402	0.768529	0.746934	0.734824	0.790649	0.77452	0.723051	0.777071	0.77244	0.776225	0.783862	0.780627	0.682176
8	31	243	0.836159	0.804206	0.721808	0.77562	0.789191	0.825946	0.807245	0.692598	0.805403	0.783513	0.79745	0.811796	0.739327	0.754971	0.716269	0.789684	0.779517	0.744871	0.789684	0.774954	0.791994	0.742194	0.776109	0.681564
9	1	244	0.814248	0.802907	0.723959	0.787728	0.780623	0.829838	0.79419	0.778164	0.778847	0.791739	0.792389	0.818634	0.757893	0.756718	0.734774	0.771395	0.78061	0.766481	0.765928	0.779209	0.772692	0.744227	0.778327	0.709244
9	2	245	0.8184	0.799973	0.777252	0.785055	0.786732	0.827973	0.807775	0.799118	0.773249	0.803788	0.79791	0.806136	0.77244	0.760933	0.742995	0.770622	0.771032	0.772391	0.76819	0.76916	0.787485	0.743651	0.783739	0.698188
9	3	246	0.760299	0.800999	0.802907	0.79791	0.796095	0.822782	0.801541	0.804287	0.783513	0.805615	0.800999	0.799195	0.749053	0.759723	0.733189	0.764984	0.759456	0.778816	0.782899	0.818232	0.790175	0.770259	0.785588	0.708043
9	4	247	0.705989	0.811957	0.809268	0.79419	0.798309	0.820385	0.792785	0.745037	0.783852	0.801541	0.799973	0.791371	0.759456	0.768237	0.731509	0.737856	0.779785	0.774954	0.756718	0.76545	0.785187	0.773519	0.776697	0.675319
9	5	248	0.795393	0.803789	0.811957	0.774161	0.795587	0.832199	0.79419	0.679637	0.734884	0.796975	0.801393	0.811118	0.765628	0.731508	0.70933	0.684398	0.776013	0.761724	0.783386	0.789684	0.793779	0.745766	0.771477	0.674885
9	6	249	0.796309	0.805601	0.806699	0.779947	0.788159	0.71205	0.650658	0.662892	0.783852	0.796543	0.795994	0.814914	0.763862	0.719428	0.771395	0.709059	0.764165	0.749751	0.778164	0.770653	0.736937	0.774598	0.760529	0.6504
9	7	250	0.821353	0.785798	0.778408	0.804287	0.795167	0.680664	0.669728	0.75156	0.719428	0.799726	0.79128	0.811183	0.75797	0.747322	0.767083	0.703034	0.759456	0.761317	0.782403	0.810448	0.76769	0.780239	0.765707	0.656468
9	8	251	0.775018	0.797777	0.782046	0.784761	0.786732	0.716665	0.727674	0.783852	0.767405	0.777544	0.797791	0.810554	0.74435	0.762402	0.764165	0.682647	0.758224	0.692126	0.763473	0.710542	0.78173	0.719392	0.758494	0.709647
9	9	252	0.792368	0.797109	0.786546	0.799635	0.789191	0.792428	0.758898	0.743344	0.791371	0.778513	0.803788	0.799118	0.752337	0.763544	0.741378	0.676094	0.763862	0.717668	0.786127	0.717565	0.758689	0.723822	0.765154	0.695673
9	10	253	0.790832	0.808802	0.746736	0.79419	0.797391	0.804608	0.768723	0.74162	0.768093	0.770472	0.802443	0.804853	0.768529	0.75095	0.731495	0.704735	0.753225	0.738269	0.785187	0.76223	0.756133	0.717757	0.766694	0.660711
9	11	254	0.807161	0.807911	0.77299	0.790305	0.759273	0.828022	0.662444	0.773505	0.799635	0.781792	0.787728	0.807245	0.767394	0.710612	0.749516	0.731509	0.767394	0.733179	0.793329	0.772815	0.749847	0.747726	0.768242	0.707232
9	12	255	0.812847	0.858656	0.789949	0.787079	0.788369	0.813535	0.62053	0.767197	0.770689	0.785632	0.782711	0.845547	0.763544	0.739569	0.748869	0.724702	0.773175	0.754246	0.765928	0.789297	0.714122	0.721576	0.768989	0.694864
9	13	256	0.818802	0.811094	0.801541	0.796975	0.780938	0.813049	0.694866	0.733148	0.71923	0.789949	0.794958	0.810534	0.73417	0.755202	0.742628	0.726382	0.774954	0.749376	0.768529	0.79283	0.734824	0.740999	0.767499	0.652498
9	14	257	0.822716	0.832946	0.809835	0.803788	0.794582	0.809268	0.73655	0.787079	0.754986	0.760047	0.808289	0.827418	0.737856	0.767083	0.739569	0.722979	0.770302	0.762175	0.778408	0.793813	0.771032	0.734429	0.778416	0.655514
9	15	258	0.82407	0.817234	0.808364	0.783513	0.773249	0.828644	0.746733	0.795632	0.717017	0.71482	0.795319	0.809835	0.747794	0.774226	0.746319	0.767836	0.753882	0.743167	0.791994	0.78173	0.754246	0.670885	0.770296	0.69993
9	16	259	0.822478	0.792119	0.808364	0.780029	0.787728	0.807412	0.787784	0.800166	0.718832	0.768943	0.805126	0.780999	0.760211	0.772075	0.746072	0.75797	0.776013	0.759093	0.776504	0.814211	0.774741	0.730796	0.77853	0.671645
9	17	260	0.816574	0.756896	0.805615	0.787728	0.766041	0.805937	0.797391	0.79791	0.654972	0.693235	0.801962	0.699981	0.759723	0.772075	0.776013	0.783882	0.756718	0.76916	0.746582	0.793329	0.75156	0.747322	0.765482	0.734377
[truncated: 919 more rows]
[truncated: 9 more columns]

## Sheet: ETo & Statistics-Snyder Model
MO	DAY	DOY	1998	1999	2000	2001	2002	2003	2004	2005	2006	2007	2008	2009	2010	2011	2012	2013	2014	2015	2016	2017	2018	2019	ETo-Snyder (Estimated)	ETo-PM (Observed)		Statistics at monthly scale												ETo-Snyder (Estimated)	ETo-PM (Observed)	Statistics at seasonal scale
[truncated: 221 more rows]

[truncated: 7 more sheets: ETo & Statistics-Mod-Snyder, ETo & Statistics-Wahed-Snyder, ETo & Statistics-Cuenca, ETo & Statistics-Allen-Pruitt, ETo & Statistics-Orang, ETo & Statistics-Pereira, ETo & Statistics-Raghuwanshi-W]
